# Supplementary material for: Comparative Transcriptomics of Fat Bodies between Symbiotic and Quasi-Aposymbiotic Adult Females of Blattella germanica with Emphasis on the Metabolic Integration with Its Endosymbiont Blattabacterium and Its Immune System
Source: MDPI journal article supplement (doi:10.3390/ijms25084228), 2024-04-11
Supplement: s1 [file s1]

**Comparative Transcriptomics of Fat Bodies Between Symbiotic and Quasi-Aposymbiotic Adult Females of *Blattella germanica* with Emphasis on the Metabolic Integration with its Endosymbiont *Blattabacterium* and Its Immune System**

Francisco J. Silva, Rebeca Domínguez-Santos, Amparo Latorre and Carlos García-Ferris

**Table S2.** Endosymbiont load of pooled quasi-aposymbiont and control fat bodies determined by qPCR. *Blattabacterium* load was quantified by the copy number of gene *ureC* (only present in *Blattabacterium*) per ng of fat body DNA of the three fat bodies pooled in each sample. Abbreviation: q-Apo (quasi-aposymbiont).

| Pooled Sample    | Number of Copies of Gene <i>ureC</i> /ng of Fat Body DNA |
|------------------|----------------------------------------------------------|
| q-Apo (pool 1)   | 5.73                                                     |
|                  | 48.53                                                    |
|                  | 13.33                                                    |
| q-Apo (pool 2)   | 4.43                                                     |
|                  | Below the limit of detection                             |
|                  | Below the limit of detection                             |
| q-Apo (pool 3)   | Below the limit of detection                             |
|                  | Below the limit of detection                             |
|                  | Below the limit of detection                             |
| q-Apo (pool 4)   | Below the limit of detection                             |
|                  | Below the limit of detection                             |
|                  | Below the limit of detection                             |
| Control (pool 1) | $1.03 \times 10^5$                                       |
|                  | $1.37 \times 10^5$                                       |
|                  | $1.07 \times 10^5$                                       |
| Control (pool 2) | $1.63 \times 10^5$                                       |
|                  | $1.28 \times 10^5$                                       |
|                  | $1.21 \times 10^5$                                       |
| Control (pool 3) | $1.21 \times 10^5$                                       |
|                  | $2.20 \times 10^5$                                       |
|                  | $2.58 \times 10^5$                                       |
| Control (pool 4) | $2.24 \times 10^5$                                       |
|                  | $1.15 \times 10^5$                                       |
|                  | $1.09 \times 10^5$                                       |
