# Supplementary material for: Comparative Transcriptomics of Fat Bodies between Symbiotic and Quasi-Aposymbiotic Adult Females of Blattella germanica with Emphasis on the Metabolic Integration with Its Endosymbiont Blattabacterium and Its Immune System
Source: MDPI journal article supplement (doi:10.3390/ijms25084228), 2024-04-11
Supplement: s1 [file s1]

# Comparative Transcriptomics of Fat Bodies Between Symbiotic and Quasi-Aposymbiotic Adult Females of *Blattella germanica* with Emphasis on the Metabolic Integration with its Endosymbiont *Blattabacterium* and Its Immune System

Francisco J. Silva, Rebeca Domínguez-Santos, Amparo Latorre and Carlos García-Ferris

|                   |   |                                                           |                                   |                                |     |    |     |   |     |  |
|-------------------|---|-----------------------------------------------------------|-----------------------------------|--------------------------------|-----|----|-----|---|-----|--|
|                   |   | *                                                         | 20                                | *                              | 40  | *  | 60  | * | 80  |  |
| PGRP-LB_Ime       | : | WGARLPK-SVEHFQGEAPYVIIHHSYMPAVCYSTPDCMKSMRDMQDFHQ-LER     | GWN                               | DIGYSFGIGGDMITGRGFNVIGAHAPK    | :   | 83 |     |   |     |  |
| PGRP-SB1_Ime      | : | WGAVSAR-SPSRISGAVDYVIIHHSNDPNGCSTSEQCKRMINKNIQSDHK-GRRNFS | DIGYNFIVAGDGKVEYEGRGFGLQGSHPN     | :                              | 83  |    |     |   |     |  |
| PGRP-SB2_Ime      | : | WCPVPISPRMPRLMPVRLIIHHTVT-APCFNPHQCQLVLRQIRADHM--RRKFRD   | DIGYNFLIGGDGRIYEGLGFGRGEHAPR      | :                              | 82  |    |     |   |     |  |
| PGRP-SC1b_Ime     | : | WGGRGAK-WTVGLGNLYLSYAIHHTAG-SYCETRAQCNAVLQSVQNYHM-DSL     | GWPDIGYNFLIGGDGNVYEGRGWNMGAAHAAE  | :                              | 82  |    |     |   |     |  |
| PGRP-SC2_Ime      | : | WGGRSAT-SKTSLANLYLSYAVIHHTAG-NYCSTKAACITQLQNIQAYHM-DSL    | GWADIGYNFLIGGDGNVYEGRGWNMGAAHATN  | :                              | 82  |    |     |   |     |  |
| PGRP-LB_1_Bge     | : | WGAKAPK-QTANITTPVPFVVIHHTYSPAYCNESDTCKKAMREMCHMHQ-DIR     | GWWDIGYNFCVGGTGKVEYEGRGWDIQGAHAPR | :                              | 83  |    |     |   |     |  |
| PGRP-SB1-like_Zne | : | WSAKPAKQRDNITSLPVPFVILHHTYIPKDCNSSECKEAMRSMQMHMQ-DLR      | GWFDIGYNFCVGETGEVYEGRGWDIQGAHAPR  | :                              | 84  |    |     |   |     |  |
| PGRP-SB1_Cse      | : | WGTKPAKETDNITSLPVPFVVLHHTHRPRFCNSEDCEAMRTMQYMHQ-DLR       | GWFDIGYNFCVGGTGNVYEGRGWDVQGAHAPR  | :                              | 84  |    |     |   |     |  |
| PGRP-LB-like_Sgr  | : | WGARPPT-ARETMKTPVPFVVIHHTYKPGFCATTEDCKKAMRTMQDMHQ-FQH     | KWN                               | DIGYNFVVGDDGKVEYEGRGWGIVGAHAPN | :   | 83 |     |   |     |  |
| PGRP-LB_2_Bge     | : | WKAVSEV-SVKNISNPVPYVVIHHTYQPPACKTRRKCAADMRSMQNFHM-NTK     | QWEDIGYNFLIGNGEVYEGRGWGVVGTHAPN   | :                              | 83  |    |     |   |     |  |
| PGRP-LB-like_Zne  | : | WGAVAAVSIVVLTSLPVPYVVIHHTFLPGFCNTSQTCEAAMRSMQNYHQ-NTN     | QWHDIGYHFCIGGTGKVEYEGRGWDVVGTHTPK | :                              | 84  |    |     |   |     |  |
| PGRP-LB_Cse       | : | WDARAPVSSQTIPSLPVPYVVIHHTYLPFGFCNTSQACEAAMRSMQNYHQ-NTQ    | KWTDIGYNFCIGGTGQVYEGRGWDIVGTHAPN  | :                              | 84  |    |     |   |     |  |
| PGRP-LB-like_Sor  | : | WGAKPPT-DVENLTLPVPYVVIHHSYIPAACTKEECINDMQWMQKYHQ-QNNS     | WCDIGYNFAVGDDNRIYVGRGWDVAVGAHAPR  | :                              | 83  |    |     |   |     |  |
| PGRP-LA-like_Bge  | : | WYGEPPK-FERQLQLPAPFVVISHTVT-QPCYEFKTCAESMRTMQGVQV-TDND    | LPLDLYSFFVVGDDGNVYEGRGWDVTNMHI-G  | :                              | 81  |    |     |   |     |  |
| PGRP-LC-like_Sgr  | : | WGGRPPL-AVEKVGTPVPFVVIHHTYIPGACNTSDDCQAKMRSMQDFHM--AK     | GLNIGYNFIVGGDNRYVYVGRGWDVGAHSPT   | :                              | 82  |    |     |   |     |  |
| PGRP-LA-like_Zne  | : | WYGVAPK-FERQLKHPTPFVVISHTAT-PACYSPVCAARMRNFQDVHMGDSHNF    | PDIGYSFVVGDDGNVYVGRGWDATNMHS-G    | :                              | 82  |    |     |   |     |  |
| PGRP-LA_Cse       | : | WNGAPAK-YERRIQLPTPYVVISHTAS-EACFSYTVCAAKMRNFQDLHIGGDLN    | LPLDIGYSFVVGDDGNVYEGRGWDVTNMHT-G  | :                              | 82  |    |     |   |     |  |
|                   |   | *                                                         | 100                               | *                              | 120 | *  | 140 | * | 160 |  |
| PGRP-LB_Ime       | : | YNDKS-VGIVLIGDWRTLEPPKQMLDAAKNLIAFGVFKGYIDPAYKLLGHRQVR    | DETECPGRLFAELISSWPH-FTHINDTEG     | :                              | 163 |    |     |   |     |  |
| PGRP-SB1_Ime      | : | YNRKS-IGIVFIGNFERSAPSAQMLQNAKDLIELAKQRYLKDNITLFGHRQTKA    | TSCPGDALYNEIKTWPH-WRQN----        | :                              | 158 |    |     |   |     |  |
| PGRP-SB2_Ime      | : | YNSQS-IGIAFIGNFQTGLPPSQMLQAARTLIQIAVQRQVSPNYSVVGHCQTKA    | TACPGIHLNELLKWPW-WRKP----         | :                              | 158 |    |     |   |     |  |
| PGRP-SC1b_Ime     | : | WNPYS-IGISFLGNYNWDTLEPNMISAAQQLINDAVNRGQLSSGYILYGHRQVS    | ATECPGTHIWNEIRGWSH-WSG-----       | :                              | 156 |    |     |   |     |  |
| PGRP-SC2_Ime      | : | WNSKS-IGISFLGNYNNTLTLSAQITAAGLLSDAVSRGQIVSGYILYGHRQVG     | STECPGTNIWNEIRTSWN-WKA-----       | :                              | 156 |    |     |   |     |  |
| PGRP-LB_1_Bge     | : | YNNRS-VGICFIGDYMEDIPTEIMTKAGKELIQLGVDGRSIDKDYKLIGHRQVR    | DTLCPGDKFFEIQSWEH-YDPIRDVVP       | :                              | 163 |    |     |   |     |  |
| PGRP-SB1-like_Zne | : | YNNRS-TGICFIGDFMNSLPTPEMMEAAKDLIKCGVNRSIAEDYKLLGHRQVR     | NLCPGDTFYENITTWPH-WDPLQDVVP       | :                              | 164 |    |     |   |     |  |
| PGRP-SB1_Cse      | : | YNNRS-TGICFIGDFMDSLPTPEMMEAAKDLIKCGVERGSIADVYKLLGHRQVR    | DTLCPGDTFYENITTWSH-WDPLADVVT      | :                              | 164 |    |     |   |     |  |
| PGRP-LB-like_Sgr  | : | YNSRS-IGISFIGDYRTSNVPTPAMLKAGQQLIRCGVARGQIAADYKLLGHRQVR   | ATECPGDAFFASIQKWPW-WSPLRDIVP      | :                              | 163 |    |     |   |     |  |
| PGRP-LB_2_Bge     | : | YNSRS-IGISFIGDYRTELPTAEMLSLAKSMIQCQGVVERGSIADYKLIGHSQVR   | RTECPGQALLNEIKKWPW-WEPIK----      | :                              | 159 |    |     |   |     |  |
| PGRP-LB-like_Zne  | : | YNSNS-TGICFIGDFRTELPTPEMLSAAKSLIECGVERGSIPEYKLLGHSSQTR    | NTECPGAALFNEIKTWPH-WDPLNNTSS      | :                              | 164 |    |     |   |     |  |
| PGRP-LB_Cse       | : | YNNRS-IGICFIGDFRAELPTLEMLATAKSLIECGVERNSTSPDYKLLGHSSQVR   | STECPGTALLNEIKTWPH-WDSLNTKTNT     | :                              | 164 |    |     |   |     |  |
| PGRP-LB-like_Sor  | : | YNSRS-IGIVLIGDWDITLPPESQMLAAQLINMGIRDGYISENYKLIGHRQVR     | ETACPGEALYKEIQMWPH-WIPNPDEEV      | :                              | 163 |    |     |   |     |  |
| PGRP-LA-like_Bge  | : | FVRCNIGIALMGNFVHDEPTIGQINSTQELLELGVLGKGIAPDYKLIPHENATY    | ATLSPGKNVVKIIEKWPHEWEPTR----      | :                              | 159 |    |     |   |     |  |
| PGRP-LC-like_Sgr  | : | YNFKS-VGISFIGDYRTELPTHDMLELAWSLIRCGVARGSISETYKLVGHRQVR    | DETECPGDRLYQEIQTWPH-WVAHRDIIP     | :                              | 162 |    |     |   |     |  |
| PGRP-LA-like_Zne  | : | FVKRCNIGISFIGNFVHDTPTNGQIQAVQELIKLGVSIGKIDKNYKLVAMNET     | FTTLSPGVVLYGIIAKWPHEWKPESHDDIG    | :                              | 164 |    |     |   |     |  |
| PGRP-LA_Cse       | : | FVTRCNIGISFIGNFIRDTPNTNGQIEAVQELIKLGVMKGKIDKYLKLVAMNET    | YNTLSPGVVLYAIIISKWPHEWKPRTREDIG   | :                              | 164 |    |     |   |     |  |

**Figure S3. Alignment of the PGRP domain superfamily (IPR036505) in several insect proteins.** The alignment includes those proteins whose branches were highlighted in colors in the phylogeny of Figure 6, with the addition of several other PGRP proteins, such as *D. melanogaster* PGRP-LB and other *D. melanogaster* PGRP proteins with amidase activity. The residues highlighted in orange are responsible for the Zn<sup>2+</sup> interaction in *D. melanogaster* PGRP-LB. The residue highlighted in red makes a fourth coordination with Zn<sup>2+</sup> through a water molecule in *Drosophila* PGRP-LB. Those residues highlighted in green are responsible for the DAP/Lys specificity. The alignment range was from W38 to G200 of *D. melanogaster* PGRP-LB (NP\_731575.1). Abbreviations: Dme (*D. melanogaster*), Bge (*B. germanica*) Zne (*Zootermopsis nevadensis*), Cse (*Cryptotermes secundus*) and Sgr (*Schistocerca gregaria*).
