# Supplementary material for: Comparative Transcriptomics of Fat Bodies between Symbiotic and Quasi-Aposymbiotic Adult Females of Blattella germanica with Emphasis on the Metabolic Integration with Its Endosymbiont Blattabacterium and Its Immune System
Source: Int J Mol Sci. 2024 Apr 11;25(8):4228. doi: 10.3390/ijms25084228 (PMC11050582; doi:10.3390/ijms25084228)
Supplement: Supplementary file 1 [file ijms-25-04228-s001.zip › Table S1.xlsx]

## Sheet: Table_S1_Title
Comparative Transcriptomics of Fat Bodies Between Symbiotic and Quasi-Aposymbiotic Adult Females of Blattella germanica with Emphasis on the Metabolic Integration with its Endosymbiont Blattabacterium and Its Immune System
Francisco J. Silva, Rebeca Domínguez-Santos, Amparo Latorre and Carlos García-Ferris
Table S1. Analyses of transcripts over- and underexpressed in aposymbiotic fat bodies

## Sheet: Column_headings_info
Column	Description
Code	1. With eggNOG annotation; 2. No eggNOG annotation but BLASTP hit; 3. Neither eggNOG nor BLASTP annotation but a single protein with DeepLoc annotation; 4. Neither eggNOG nor BLASTP annotation but more than one protein with DeepLoc annotation; 5. Noncoding transcripts; 6. Blattabacterium transcripts
Trans numb	Transcript number
Diff. Exp. q-Apo	Differential expression comparing q-Aposymbiont versus Control fat bodies (Overexpression or Underexpression)
Transcript code	Transcript TRINITY code
Trans. Length	Transcript length
Protein code	Transdecoder protein code(s)
Prot. Length	Protein length
Protein type	Transdecoder protein type (5prime, 3prime, complete)
Fold Change (q-Apo /Control OR Control/q-Apo)	Fold Change obtained from log2FoldChange (Higher expressed/Lower expressed)
baseMean	mean normalised counts, averaged over all samples from both conditions. The first column, baseMean, is a just the average of the normalized count values, dividing by size factors, taken over all samples in the DESeqDataSet.
log2FoldChange	the logarithm (to basis 2) of the fold change
lfcSE	standard error estimate for the log2 fold change estimate
stat	Wald statistic
pvalue	p value for the statistical significance of this change
padj	p value adjusted for multiple testing with the Benjamini-Hochberg procedure which controls false discovery rate (FDR)
Mean TPM q-Apob FB	Mean of four TPM (Transcripts Per kilobase Million) samples obtained from Kallisto in q-Aposymbiont Fat Bodies
Mean TPM Control FB	Mean of four TPM (Transcripts Per kilobase Million) samples obtained from Kallisto in Control Fat Bodies
SD TPM q-Apob FB	Standard deviation of four TPM (Transcripts Per kilobase Million) samples obtained from Kallisto in q-Aposymbiont Fat Bodies
SD TPM Control FB	Standard deviation of four TPM (Transcripts Per kilobase Million) samples obtained from Kallisto in Control Fat Bodies
DeepLoc Localizations	Subcellular localizations predicted for the query protein with DeepLoc 2.0
DeepLoc Signals	Sorting signals predicted for the query protein with DeepLoc 2.0
BLASTP Best hit Subject product	Best hit from BLASTP against the non-redundant protein sequences (nr) database from NCBI (e-value cutoff 1.0 E-0.5)
BLASTP Feature comment	Feature comment from BLASTP against the non-redundant protein sequences (nr) database from NCBI (e-value cutoff 1.0 E-0.5)
BLASTP Length subject	Length subject from BLASTP against the non-redundant protein sequences (nr) database from NCBI (e-value cutoff 1.0 E-0.5)
BLASTP subject acc.ver	Subject accession from BLASTP against the non-redundant protein sequences (nr) database from NCBI (e-value cutoff 1.0 E-0.5)
BLASTP %id	Alignment %id from BLASTP against the non-redundant protein sequences (nr) database from NCBI (e-value cutoff 1.0 E-0.5)
BLASTP alignment length	Alignment length from BLASTP against the non-redundant protein sequences (nr) database from NCBI (e-value cutoff 1.0 E-0.5)
seed_ortholog	hit against a target eggNOG sequence
evalue
score
eggNOG_OGs	Orthologous Groups (OGs) identified for this query
max_annot_lvl	Taxonomy annotation
COG_code	COG code
Description
PFAMs	PFAM domain(s)
Preferred_name	Preferred symbol gene name
GOs	GO terms
EC	EC number
KEGG_ko	One or more KO identifiers (or K numbers) assigned to the protein
KEGG ko-1	KO identifier number for ko-1
ko-1 symbol	KO symbol gene name for ko-1
ko-1 name	KO product name for ko-1
KEGG ko-2	KO identifier number for ko-2
ko-2 symbol	KO symbol gene name for ko-2
ko-2 name	KO product name for ko-2
KEGG ko-3	KO identifier number for ko-3
KEGG ko-4	KO identifier number for ko-4
KEGG ko-5	KO identifier number for ko-5
KEGG Pathway	KEGG pathways to which the gene has been mapped through the KO system
KEGG Module	KEGG modules (complete modules only) to which the gene has been mapped through the KO system
KEGG Reaction	KEGG REACTION is a database of chemical reactions, each reaction is identified by the R number
KEGG rclass	KEGG RCLASS contains classification of reactions based on the chemical structure transformation patterns of substrate-product pairs (reactant pairs)
BRITE	Hierarchical classification of gene functions according to the KO system
KEGG_TC	predicted KEGG_TC identifier
CAZy	best hit with Carbohydrate-Active enZYmes Database
BiGG_Reaction	predicted BiGG metabolic reactions
Additional gene information	Additional information obtained from phylogenetic or BLASTP analyses

## Sheet: Apo_Over_FINAL
Code	Trans numb	Diff. Exp. q-Apo	Transcript code	Trans. Length	Protein code	Prot. Length	Protein type	Fold Change (q-Apo /Control)	baseMean	log2FoldChange	lfcSE	stat	pvalue	padj	Mean TPM q-Apob FB	Mean TPM Control FB	SD TPM q-Apob FB	SD TPM Control FB	DeepLoc Localizations	DeepLoc Signals	BLASTP Best hit Subject product	BLASTP Feature comment	BLASTP Length subject	BLASTP subject acc.ver	BLASTP %id	BLASTP alignment length	seed_ortholog	evalue	score	eggNOG_OGs	max_annot_lvl	COG_code	Description	PFAMs	Preferred_name	GOs	EC	KEGG_ko	KEGG ko-1	ko-1 symbol	ko-1 name	KEGG ko-2	ko-2 symbol	ko-2 name	KEGG ko-3	KEGG ko-4	KEGG Pathway	KEGG Module	KEGG Reaction
1	1	Over	Duox_Blatella_germanica	4635	Duox_Blatella_germanica.p1	1544	complete	27.3	69.9864	-4.76861	0.560419	-8.50901	1.75431e-17	2.46755e-14	15	0.4	5.5	0.2	Cell membrane	Signal peptide|Transmembrane domain							7165.AGAP009978-PA	0	2496	KOG0039@1|root,KOG0039@2759|Eukaryota,38CEX@33154|Opisthokonta,3BDMU@33208|Metazoa,3CTQ7@33213|Bilateria,41UZI@6656|Arthropoda,3SH5C@50557|Insecta,450MX@7147|Diptera,45E9X@7148|Nematocera	33208|Metazoa	PQ	Dual oxidase	An_peroxidase,EF-hand_1,EF-hand_5,EF-hand_7,FAD_binding_8,Ferric_reduct,NAD_binding_6	bli-3	GO:0002009,GO:0002119,GO:0002164,GO:0002165,GO:0002251,GO:0002376,GO:0002385,GO:0003674,GO:0003824,GO:0004601,GO:0005488,GO:0005575,GO:0005623,GO:0005886,GO:0006464,GO:0006807,GO:0006950,GO:0006952,GO:0006955,GO:0006979,GO:0007154,GO:0007165,GO:0007166,GO:0007275,GO:0007444,GO:0007472,GO:0007476,GO:0007552,GO:0007560,GO:0007591,GO:0007593,GO:0008150,GO:0008152,GO:0008365,GO:0009605,GO:0009607,GO:…	1.6.3.1	ko:K13411	K13411	DUOX	dual oxidase [EC:1.6.3.1 1.11.1.-]	0	0	0	0	0	ko04013,ko04624,map04013,map04624	-	-
1	2	Over	TRINITY_DN10_c0_g1_i3	4193	TRINITY_DN10_c0_g1_i3.p1	1278	3prime_partial	11.7	1188.31	-3.55446	1.01287	-3.5093	0.00044928	0.0174028	263.7	18.7	243	24.5	Extracellular	Signal peptide							136037.KDR10122	1,35E-310	914	KOG1218@1|root,KOG3510@1|root,KOG1218@2759|Eukaryota,KOG3510@2759|Eukaryota,39NDY@33154|Opisthokonta,3CPYH@33208|Metazoa,3E63S@33213|Bilateria	33208|Metazoa	T	Fibronectin type 3 domain	fn3	-	-	-	-	0	0	0	0	0	0	0	0	-	-	-
1	3	Over	TRINITY_DN10_c0_g1_i4	4193	TRINITY_DN10_c0_g1_i4.p1	1278	3prime_partial	5.9	2434.01	-2.55134	0.708213	-3.60251	0.000315161	0.013208	503.6	66	378.7	56.2	Extracellular	Signal peptide							136037.KDR10122	6,78E-311	914	KOG1218@1|root,KOG3510@1|root,KOG1218@2759|Eukaryota,KOG3510@2759|Eukaryota,39NDY@33154|Opisthokonta,3CPYH@33208|Metazoa,3E63S@33213|Bilateria	33208|Metazoa	T	Fibronectin type 3 domain	fn3	-	-	-	-	0	0	0	0	0	0	0	0	-	-	-
1	4	Over	TRINITY_DN10084_c0_g1_i1	2994	TRINITY_DN10084_c0_g1_i1.p1	421	complete	17.6	31.4328	-4.13629	1.1428	-3.61943	0.000295256	0.0126808	10.6	0.5	7	0.9	Cytoplasm|Nucleus	Peroxisomal targeting signal							132113.XP_003491942.1	4.42e-252	700	KOG0685@1|root,KOG0685@2759|Eukaryota,38DWW@33154|Opisthokonta,3BF08@33208|Metazoa,3CVXC@33213|Bilateria,41WC9@6656|Arthropoda,3SJBH@50557|Insecta,46M69@7399|Hymenoptera	33208|Metazoa	H	Flavin containing amine oxidoreductase	Amino_oxidase	-	GO:0005575,GO:0005622,GO:0005623,GO:0005737,GO:0044424,GO:0044464	-	-	0	0	0	0	0	0	0	0	-	-	-
1	5	Over	TRINITY_DN10085_c0_g2_i1	1602	TRINITY_DN10085_c0_g2_i1.p1	506	3prime_partial	4.9	16.3008	-2.29823	0.610198	-3.76636	0.000165644	0.00847041	9.3	1.3	2.2	1.1	Cell membrane	Transmembrane domain							136037.KDR23340	1.08e-159	469	KOG0254@1|root,KOG0254@2759|Eukaryota,38BKC@33154|Opisthokonta,3BCIB@33208|Metazoa,3CWVB@33213|Bilateria	33208|Metazoa	P	trehalose transmembrane transporter activity	Sugar_tr	-	-	-	ko:K08145,ko:K14258	K08145	SLC2A8	MFS transporter, SP family, solute carrier family 2 (facilitated glucose transporter), member 8	K14258	TRET1	facilitated trehalose transporter	0	0	-	-	-
1	6	Over	TRINITY_DN102_c0_g2_i5	4503	TRINITY_DN102_c0_g2_i5.p1	393	complete	5.1	55.5964	-2.35423	0.416803	-5.64831	1.62036e-08	3.31511e-06	10.6	1.5	2.5	0.6	Cytoplasm|Mitochondrion	Mitochondrial transit peptide							136037.KDR12729	1.88e-215	602	COG0183@1|root,KOG1390@2759|Eukaryota,38C4X@33154|Opisthokonta,3BDQV@33208|Metazoa,3CYAF@33213|Bilateria,41X1F@6656|Arthropoda,3SFYB@50557|Insecta	33208|Metazoa	I	Belongs to the thiolase family	Thiolase_C,Thiolase_N	ACAT2	GO:0001101,GO:0001889,GO:0003674,GO:0003824,GO:0003985,GO:0003988,GO:0005575,GO:0005622,GO:0005623,GO:0005634,GO:0005730,GO:0005737,GO:0005739,GO:0005777,GO:0005829,GO:0006066,GO:0006082,GO:0006091,GO:0006629,GO:0006631,GO:0006635,GO:0006694,GO:0006695,GO:0006720,GO:0007154,GO:0007275,GO:0007399,GO:0007417,GO:0007420,GO:0007584,GO:0008150,GO:0008152,GO:0008202,GO:0008203,GO:0008299,GO:0008610,GO:…	2.3.1.9	ko:K00626	K00626	ACAT	acetyl-CoA C-acetyltransferase [EC:2.3.1.9]	0	0	0	0	0	ko00071,ko00072,ko00280,ko00310,ko00362,ko00380,ko00620,ko00630,ko00640,ko00650,ko00720,ko00900,ko01100,ko01110,ko01120,ko01130,ko01200,ko01212,ko02020,map00071,map00072,map00280,map00310,map00362,map00380,map00620,map00630,map00640,map00650,map00720,map00900,map01100,map01110,map01120,map01130,map01200,map01212,map02020	M00088,M00095,M00373,M00374,M00375	R00238,R01177
1	7	Over	TRINITY_DN10299_c0_g1_i1	1659	TRINITY_DN10299_c0_g1_i1.p1	553	internal	22.7	22.5954	-4.50581	0.763304	-5.90304	3.56873e-09	9.02407e-07	14.4	0.5	4.9	0.5	Nucleus	Nuclear localization signal|Nuclear export signal							13249.RPRC008840-PA	2.33e-32	132	KOG1075@1|root,KOG1075@2759|Eukaryota,3AQ0C@33154|Opisthokonta,3C2M2@33208|Metazoa,3DIDC@33213|Bilateria,422YU@6656|Arthropoda,3SRPW@50557|Insecta,3EE85@33342|Paraneoptera	33208|Metazoa	S	Endonuclease/Exonuclease/phosphatase family	-	-	-	-	-	0	0	0	0	0	0	0	0	-	-	-
1	8	Over	TRINITY_DN10510_c0_g1_i1	1481	TRINITY_DN10510_c0_g1_i1.p1	422	complete	26.2	25.1649	-4.71132	0.915983	-5.14346	2.69727e-07	4.10149e-05	18.3	0.5	11.9	0.6	Cell membrane	Signal peptide							136037.KDR17728	1.27e-114	348	KOG3646@1|root,KOG3646@2759|Eukaryota,39N5V@33154|Opisthokonta,3CPR5@33208|Metazoa,3E5W9@33213|Bilateria,42AZ9@6656|Arthropoda,3T0D5@50557|Insecta	33208|Metazoa	U	Neurotransmitter-gated ion-channel ligand binding domain	Neur_chan_LBD	-	-	-	-	0	0	0	0	0	0	0	0	-	-	-
1	9	Over	TRINITY_DN1092_c0_g1_i11	4140	TRINITY_DN1092_c0_g1_i11.p1	614	complete	3.1	124.934	-1.65521	0.33019	-5.01291	5.36142e-07	7.63663e-05	23.7	5.2	6.5	0.9	Cytoplasm|Nucleus	Nuclear localization signal|Nuclear export signal							7029.ACYPI43115-PA	6.32e-105	337	KOG1075@1|root,KOG1075@2759|Eukaryota,3AB3G@33154|Opisthokonta,3BQKC@33208|Metazoa,3D77Y@33213|Bilateria,42261@6656|Arthropoda,3SSCY@50557|Insecta	33208|Metazoa	S	Reverse transcriptase (RNA-dependent DNA polymerase)	RVT_1	-	-	-	ko:K10577	K10577	UBE2I	ubiquitin-conjugating enzyme E2 I	0	0	0	0	0	ko03013,ko04064,ko04120,ko05206,map03013,map04064,map04120,map05206	M00427	-
1	10	Over	TRINITY_DN1150_c0_g2_i6	1465	TRINITY_DN1150_c0_g2_i6.p2	111	5prime_partial	18.1	5.4692	-4.17552	1.18664	-3.51877	0.000433554	0.0170282	3.8	0.1	1.3	0.3	Cytoplasm	Nuclear localization signal							136037.KDR14784	1e-22	98.6	2AMXB@1|root,2RZD1@2759|Eukaryota,3A3T0@33154|Opisthokonta,3BRAG@33208|Metazoa,3D7BN@33213|Bilateria,42017@6656|Arthropoda,3SNFT@50557|Insecta	33208|Metazoa	S	Transferase activity, transferring phosphorus-containing groups	EcKinase	CHKov1	GO:0003008,GO:0003674,GO:0005488,GO:0005515,GO:0007275,GO:0007423,GO:0007444,GO:0007600,GO:0008092,GO:0008150,GO:0009888,GO:0017022,GO:0019233,GO:0022416,GO:0032501,GO:0032502,GO:0035220,GO:0035295,GO:0048513,GO:0048731,GO:0048856,GO:0050877,GO:0060429	-	-	0	0	0	0	0	0	0	0	-	-	-
1	11	Over	TRINITY_DN11578_c0_g1_i1	1557	TRINITY_DN11578_c0_g1_i1.p1	418	5prime_partial	19.7	17.8251	-4.29699	0.813885	-5.27959	1.2947e-07	2.17442e-05	12.1	0.4	6.1	0.4	Cell membrane	Signal peptide							136037.KDR17733	8.6e-127	379	KOG3645@1|root,KOG3645@2759|Eukaryota,3A20F@33154|Opisthokonta,3BRAT@33208|Metazoa,3D7ZX@33213|Bilateria,41ZD7@6656|Arthropoda,3SMKV@50557|Insecta	33208|Metazoa	T	Acetylcholine Receptor	Neur_chan_LBD	-	-	-	-	0	0	0	0	0	0	0	0	-	-	-
1	12	Over	TRINITY_DN11623_c0_g1_i7	1795	TRINITY_DN11623_c0_g1_i7.p1	498	5prime_partial	41.3	82.8811	-5.36736	0.782897	-6.85577	7.09304e-12	2.70557e-09	48.4	0.9	17.8	0.9	Cytoplasm	Nuclear export signal							136037.KDR13120	2.94e-261	725	COG0076@1|root,KOG0629@2759|Eukaryota,38CT3@33154|Opisthokonta,3BB5R@33208|Metazoa,3CUJ9@33213|Bilateria,41VCP@6656|Arthropoda,3SH5Z@50557|Insecta	33208|Metazoa	E	activity. It is involved in the biological process described with carboxylic acid metabolic process	Pyridoxal_deC	-	GO:0003674,GO:0003824,GO:0004351,GO:0016829,GO:0016830,GO:0016831	4.1.1.11,4.1.1.15,4.1.1.29	ko:K01580,ko:K01594,ko:K18966	K01580	E4.1.1.15	glutamate decarboxylase [EC:4.1.1.15]	K01594	CSAD	sulfinoalanine decarboxylase	K18966	0	ko00250,ko00410,ko00430,ko00650,ko00770,ko01100,ko01110,ko01120,ko02024,ko04727,ko04940,map00250,map00410,map00430,map00650,map00770,map01100,map01110,map01120,map02024,map04727,map04940	M00027	R00261,R00489,R01682,R02466
1	13	Over	TRINITY_DN11811_c0_g1_i1	2577	TRINITY_DN11811_c0_g1_i1.p1	748	complete	2184.2	223.027	-11.0929	1.11967	-9.90727	3.8706e-23	1.2444e-19	91.5	0	28.3	0	Golgi apparatus	Signal peptide|Transmembrane domain							136037.KDR10811	2.03e-130	404	2BXUY@1|root,2SFUM@2759|Eukaryota,3ADT0@33154|Opisthokonta,3BWIY@33208|Metazoa,3DC4R@33213|Bilateria,421KG@6656|Arthropoda,3SQ4B@50557|Insecta	33208|Metazoa	0	-	-	-	-	-	-	0	0	0	0	0	0	0	0	-	-	-
1	14	Over	TRINITY_DN12073_c0_g1_i8	505	TRINITY_DN12073_c0_g1_i8.p1	74	3prime_partial	4.7	10.3606	-2.24086	0.611008	-3.66748	0.000244954	0.0111367	24.3	3.8	6.6	1.7	Cytoplasm								136037.KDR23403	2.17e-24	97.4	29N2G@1|root,2RVCX@2759|Eukaryota,3APNW@33154|Opisthokonta,3CNB1@33208|Metazoa,3DIYV@33213|Bilateria,428BB@6656|Arthropoda,3SRX5@50557|Insecta	33208|Metazoa	0	-	-	-	-	-	-	0	0	0	0	0	0	0	0	-	-	-
1	15	Over	TRINITY_DN12446_c0_g1_i1	2214	TRINITY_DN12446_c0_g1_i1.p1	638	complete	2	326.449	-1.02186	0.180893	-5.64896	1.61424e-08	3.31511e-06	105.6	36.5	11.5	6.5	Nucleus	Nuclear localization signal							136037.KDR12537	0	1082	COG1084@1|root,KOG1490@2759|Eukaryota,39M2V@33154|Opisthokonta,3BDD6@33208|Metazoa,3CX4G@33213|Bilateria,41WBZ@6656|Arthropoda,3SHGQ@50557|Insecta	33208|Metazoa	S	Involved in the biogenesis of the 60S ribosomal subunit	NOG1,NOGCT	GTPBP4	GO:0000079,GO:0000166,GO:0000226,GO:0000278,GO:0000280,GO:0000463,GO:0000470,GO:0001882,GO:0001883,GO:0001932,GO:0003674,GO:0003824,GO:0003924,GO:0005488,GO:0005525,GO:0005575,GO:0005622,GO:0005623,GO:0005634,GO:0005635,GO:0005730,GO:0005737,GO:0005794,GO:0005829,GO:0006139,GO:0006275,GO:0006364,GO:0006396,GO:0006725,GO:0006807,GO:0006996,GO:0007010,GO:0007017,GO:0007049,GO:0007051,GO:0007052,GO:…	-	ko:K06943	K06943	NOG1	nucleolar GTP-binding protein	0	0	0	0	0	ko03008,map03008	-	-
1	16	Over	TRINITY_DN12459_c0_g1_i1	1340	TRINITY_DN12459_c0_g1_i1.p1	311	3prime_partial	4	17.7769	-2.01755	0.619484	-3.25682	0.00112669	0.0342651	11.9	2	3.6	1.3	Cytoplasm	Nuclear export signal							136037.KDR20107	1.57e-146	455	KOG3632@1|root,KOG3632@2759|Eukaryota,38CCB@33154|Opisthokonta,3BEY5@33208|Metazoa,3CSJI@33213|Bilateria,41UX5@6656|Arthropoda,3SIK2@50557|Insecta	33208|Metazoa	T	Src homology 3 domains	SH3_2,SH3_9	BZRAP1	GO:0003674,GO:0005102,GO:0005488,GO:0005515,GO:0005575,GO:0005622,GO:0005623,GO:0005737,GO:0005739,GO:0005829,GO:0005856,GO:0005938,GO:0006629,GO:0006694,GO:0006700,GO:0006996,GO:0007010,GO:0007154,GO:0007267,GO:0007268,GO:0007274,GO:0008150,GO:0008152,GO:0008202,GO:0008207,GO:0008610,GO:0009058,GO:0009892,GO:0009987,GO:0010563,GO:0010817,GO:0010921,GO:0010923,GO:0016043,GO:0019220,GO:0019222,GO:…	-	ko:K17591,ko:K19922	K17591	RIMBP2	RIMS-binding protein 2	K19922	TSPOAP1	peripheral-type benzodiazepine receptor-associated protein 1	0	0	-	-	-
1	17	Over	TRINITY_DN1262_c0_g1_i2	2800	TRINITY_DN1262_c0_g1_i2.p1	576	complete	3.1	657.53	-1.64479	0.366897	-4.48296	7.36133e-06	0.000704965	186	42.9	46.6	15.8	Mitochondrion	Mitochondrial transit peptide							136037.KDR16255	1.44e-244	692	COG0318@1|root,KOG1176@2759|Eukaryota,38D90@33154|Opisthokonta,3BIS4@33208|Metazoa,3CTVC@33213|Bilateria,41VNM@6656|Arthropoda,3SI9W@50557|Insecta	33208|Metazoa	I	catalytic activity. It is involved in the biological process described with metabolic process	AMP-binding,AMP-binding_C	-	GO:0001676,GO:0003674,GO:0003824,GO:0004467,GO:0005575,GO:0005622,GO:0005623,GO:0005737,GO:0005739,GO:0006082,GO:0006139,GO:0006163,GO:0006164,GO:0006629,GO:0006631,GO:0006637,GO:0006638,GO:0006639,GO:0006641,GO:0006725,GO:0006732,GO:0006753,GO:0006790,GO:0006793,GO:0006796,GO:0006807,GO:0008150,GO:0008152,GO:0009056,GO:0009058,GO:0009108,GO:0009117,GO:0009150,GO:0009152,GO:0009165,GO:0009259,GO:…	6.2.1.12	ko:K01904	K01904	4CL	4-coumarate--CoA ligase [EC:6.2.1.12]	0	0	0	0	0	ko00130,ko00360,ko00940,ko01100,ko01110,map00130,map00360,map00940,map01100,map01110	M00039,M00137,M00350	R01616,R01943,R02194,R02221,R02255,R06583
1	18	Over	TRINITY_DN1278_c8_g1_i1	3580	TRINITY_DN1278_c8_g1_i1.p1	858	complete	4.8	69.1701	-2.26346	0.367531	-6.15856	7.34106e-10	2.09127e-07	16.7	2.5	3.8	1.1	Cytoplasm	Nuclear localization signal|Nuclear export signal							136037.KDR15464	0	904	KOG4356@1|root,KOG4356@2759|Eukaryota,38HR9@33154|Opisthokonta,3BBM0@33208|Metazoa,3CUPJ@33213|Bilateria,41VZH@6656|Arthropoda,3SJXB@50557|Insecta	33208|Metazoa	Z	Required for cytoplasmic pre-assembly of axonemal dyneins, thereby playing a central role in motility in cilia and flagella. Involved in pre-assembly of dynein arm complexes in the cytoplasm before intraflagellar transport loads them for the ciliary compartment	PIH1	DNAAF2	GO:0000226,GO:0001101,GO:0001539,GO:0001578,GO:0003674,GO:0005488,GO:0005515,GO:0005575,GO:0005622,GO:0005623,GO:0005737,GO:0005815,GO:0005829,GO:0005856,GO:0005929,GO:0006928,GO:0006996,GO:0007010,GO:0007017,GO:0008150,GO:0008157,GO:0009987,GO:0010033,GO:0015630,GO:0016043,GO:0019899,GO:0019902,GO:0019903,GO:0022607,GO:0030030,GO:0030031,GO:0032526,GO:0033993,GO:0034622,GO:0035082,GO:0036064,GO:…	-	ko:K19751	K19751	DNAAF2	dynein axonemal assembly factor 2	0	0	0	0	0	-	-	-
1	19	Over	TRINITY_DN12915_c0_g2_i1	2872	TRINITY_DN12915_c0_g2_i1.p1	309	complete	4.2	64.7991	-2.07823	0.39765	-5.22629	1.72942e-07	2.73452e-05	19.2	3.1	3.4	0.9	Mitochondrion	Transmembrane domain|Mitochondrial transit peptide							136037.KDR15705	1.87e-198	552	KOG0750@1|root,KOG0750@2759|Eukaryota,38D7X@33154|Opisthokonta,3BAM1@33208|Metazoa,3CWI8@33213|Bilateria,41UCP@6656|Arthropoda,3SKHG@50557|Insecta	33208|Metazoa	C	Belongs to the mitochondrial carrier (TC 2.A.29) family	Mito_carr	SLC25A22	GO:0003333,GO:0003674,GO:0005215,GO:0005280,GO:0005283,GO:0005310,GO:0005313,GO:0005314,GO:0005326,GO:0005328,GO:0005342,GO:0005343,GO:0005416,GO:0005575,GO:0005622,GO:0005623,GO:0005737,GO:0005739,GO:0005740,GO:0005743,GO:0006810,GO:0006811,GO:0006812,GO:0006814,GO:0006820,GO:0006835,GO:0006836,GO:0006839,GO:0006855,GO:0006865,GO:0008150,GO:0008324,GO:0008509,GO:0008514,GO:0015075,GO:0015077,GO:…	-	ko:K15107	K15107	SLC25A18_22	solute carrier family 25 (mitochondrial glutamate transporter), member 18/22	0	0	0	0	0	-	-	-
1	20	Over	TRINITY_DN13405_c0_g1_i1	2860	TRINITY_DN13405_c0_g1_i1.p1	544	complete	8.3	18.7022	-3.04812	0.562905	-5.41499	6.12938e-08	1.10353e-05	6.2	0.5	1.5	0.4	Cytoplasm|Nucleus	Nuclear export signal							136037.KDR18208	0	902	COG2940@1|root,KOG2084@2759|Eukaryota,39SY5@33154|Opisthokonta,3BCSM@33208|Metazoa,3D1KK@33213|Bilateria,41WNP@6656|Arthropoda,3SJNR@50557|Insecta	33208|Metazoa	B	Protein msta, isoform	SET,zf-MYND	-	-	-	-	0	0	0	0	0	0	0	0	-	-	-
1	21	Over	TRINITY_DN135_c0_g1_i7	1616	TRINITY_DN135_c0_g1_i7.p1	108	complete	17.8	16.0866	-4.14984	1.31856	-3.14724	0.00164819	0.0455124	10.6	0.5	6.2	1	Cytoplasm								136037.KDR06407	1.31e-44	150	2E11I@1|root,2S8E8@2759|Eukaryota,3A93Q@33154|Opisthokonta,3BUGN@33208|Metazoa,3DAVW@33213|Bilateria,42190@6656|Arthropoda,3SPGJ@50557|Insecta	33208|Metazoa	0	-	-	-	GO:0008150,GO:0030431,GO:0032501	-	-	0	0	0	0	0	0	0	0	-	-	-
1	22	Over	TRINITY_DN1374_c0_g1_i1	1149	TRINITY_DN1374_c0_g1_i1.p1	204	complete	4.9	99.8243	-2.28437	0.593774	-3.84721	0.000119469	0.00659412	83	11.9	58.4	2.2	Extracellular	Signal peptide							121225.PHUM617050-PA	1.3e-47	162	KOG3160@1|root,KOG3160@2759|Eukaryota,3A65Q@33154|Opisthokonta,3C7Y1@33208|Metazoa,3DNYM@33213|Bilateria,42C8N@6656|Arthropoda,3SY9M@50557|Insecta,3EDN2@33342|Paraneoptera	33208|Metazoa	O	Gamma interferon inducible lysosomal thiol reductase (GILT)	GILT	-	-	-	ko:K08059	K08059	IFI30	interferon, gamma-inducible protein 30	0	0	0	0	0	ko04612,map04612	-	-
1	23	Over	TRINITY_DN139_c0_g1_i20	1932	TRINITY_DN139_c0_g1_i20.p2	149	complete	13.3	10.6384	-3.73117	1.07762	-3.46242	0.00053534	0.0198155	5.5	0.3	3.5	0.4	Cytoplasm|Nucleus	Nuclear localization signal							12957.ACEP19523-PA	6.95e-25	101	KOG4205@1|root,KOG4205@2759|Eukaryota,3AMG2@33154|Opisthokonta,3C09Q@33208|Metazoa,3DGSX@33213|Bilateria,41TX7@6656|Arthropoda,3SFZZ@50557|Insecta,46EPB@7399|Hymenoptera	33208|Metazoa	A	RNA recognition motif	RRM_1	-	GO:0000003,GO:0000184,GO:0000226,GO:0000375,GO:0000377,GO:0000398,GO:0000578,GO:0000785,GO:0000956,GO:0001667,GO:0002009,GO:0002064,GO:0002065,GO:0002066,GO:0003002,GO:0003006,GO:0003674,GO:0003676,GO:0003723,GO:0003729,GO:0003730,GO:0005488,GO:0005575,GO:0005622,GO:0005623,GO:0005634,GO:0005654,GO:0005694,GO:0005700,GO:0005703,GO:0005737,GO:0006139,GO:0006396,GO:0006397,GO:0006401,GO:0006402,GO:…	-	ko:K03102,ko:K14411	K03102	SQD	squid	K14411	MSI	RNA-binding protein Musashi	0	0	ko03015,ko04320,map03015,map04320	-	-
1	24	Over	TRINITY_DN139_c0_g1_i25	3600	TRINITY_DN139_c0_g1_i25.p1	127	complete	2.3	125.432	-1.18546	0.309293	-3.8328	0.000126691	0.00682102	25.1	8	1.6	4	Cytoplasm|Nucleus	Nuclear localization signal							12957.ACEP19523-PA	3.23e-25	101	KOG4205@1|root,KOG4205@2759|Eukaryota,3AMG2@33154|Opisthokonta,3C09Q@33208|Metazoa,3DGSX@33213|Bilateria,41TX7@6656|Arthropoda,3SFZZ@50557|Insecta,46EPB@7399|Hymenoptera	33208|Metazoa	A	RNA recognition motif	RRM_1	-	GO:0000003,GO:0000184,GO:0000226,GO:0000375,GO:0000377,GO:0000398,GO:0000578,GO:0000785,GO:0000956,GO:0001667,GO:0002009,GO:0002064,GO:0002065,GO:0002066,GO:0003002,GO:0003006,GO:0003674,GO:0003676,GO:0003723,GO:0003729,GO:0003730,GO:0005488,GO:0005575,GO:0005622,GO:0005623,GO:0005634,GO:0005654,GO:0005694,GO:0005700,GO:0005703,GO:0005737,GO:0006139,GO:0006396,GO:0006397,GO:0006401,GO:0006402,GO:…	-	ko:K03102,ko:K14411	K03102	SQD	squid	K14411	MSI	RNA-binding protein Musashi	0	0	ko03015,ko04320,map03015,map04320	-	-
1	25	Over	TRINITY_DN139_c0_g1_i30	2001	TRINITY_DN139_c0_g1_i30.p2	172	complete	12.1	15.2357	-3.59396	0.997501	-3.60296	0.000314613	0.013208	7.4	0.5	3.8	0.6	Cytoplasm|Nucleus	Nuclear localization signal							12957.ACEP19523-PA	1.48e-24	101	KOG4205@1|root,KOG4205@2759|Eukaryota,3AMG2@33154|Opisthokonta,3C09Q@33208|Metazoa,3DGSX@33213|Bilateria,41TX7@6656|Arthropoda,3SFZZ@50557|Insecta,46EPB@7399|Hymenoptera	33208|Metazoa	A	RNA recognition motif	RRM_1	-	GO:0000003,GO:0000184,GO:0000226,GO:0000375,GO:0000377,GO:0000398,GO:0000578,GO:0000785,GO:0000956,GO:0001667,GO:0002009,GO:0002064,GO:0002065,GO:0002066,GO:0003002,GO:0003006,GO:0003674,GO:0003676,GO:0003723,GO:0003729,GO:0003730,GO:0005488,GO:0005575,GO:0005622,GO:0005623,GO:0005634,GO:0005654,GO:0005694,GO:0005700,GO:0005703,GO:0005737,GO:0006139,GO:0006396,GO:0006397,GO:0006401,GO:0006402,GO:…	-	ko:K03102,ko:K14411	K03102	SQD	squid	K14411	MSI	RNA-binding protein Musashi	0	0	ko03015,ko04320,map03015,map04320	-	-
1	26	Over	TRINITY_DN140_c0_g1_i7	4037	TRINITY_DN140_c0_g1_i7.p1	393	5prime_partial	69.2	7.06246	-6.11193	1.85042	-3.303	0.000956567	0.0303632	1.8	0	1.4	0	Cytoplasm	Nuclear export signal							136037.KDR23715	1.94e-45	174	2CYXM@1|root,2S72I@2759|Eukaryota,39N02@33154|Opisthokonta,3CPJ8@33208|Metazoa,3E5QA@33213|Bilateria,42ARY@6656|Arthropoda,3T058@50557|Insecta	33208|Metazoa	0	-	-	-	-	-	-	0	0	0	0	0	0	0	0	-	-	-
1	27	Over	TRINITY_DN1421_c0_g1_i4	2120	TRINITY_DN1421_c0_g1_i4.p1	522	complete	670.9	68.5054	-9.39005	1.11818	-8.39764	4.55542e-17	5.69554e-14	34.8	0	10	0	Endoplasmic reticulum	Signal peptide|Transmembrane domain							136037.KDR20744	2.17e-201	577	KOG1192@1|root,KOG1192@2759|Eukaryota,38B62@33154|Opisthokonta,3BDT1@33208|Metazoa,3CY8Z@33213|Bilateria,41XIT@6656|Arthropoda,3SZAE@50557|Insecta	33208|Metazoa	G	UDP-glucoronosyl and UDP-glucosyl transferase	UDPGT	UGT2A1	GO:0001523,GO:0001889,GO:0001972,GO:0002237,GO:0002526,GO:0003008,GO:0003674,GO:0003824,GO:0004857,GO:0005080,GO:0005488,GO:0005496,GO:0005501,GO:0005504,GO:0005515,GO:0005575,GO:0005622,GO:0005623,GO:0005634,GO:0005635,GO:0005640,GO:0005737,GO:0005783,GO:0005789,GO:0005886,GO:0005887,GO:0005975,GO:0005996,GO:0006063,GO:0006082,GO:0006109,GO:0006629,GO:0006631,GO:0006706,GO:0006711,GO:0006720,GO:…	2.4.1.17,2.4.1.47	ko:K00699,ko:K04628	K00699	UGT	glucuronosyltransferase [EC:2.4.1.17]	K04628	CGT	ceramide galactosyltransferase [EC:2.4.1.47]	0	0	ko00040,ko00053,ko00140,ko00565,ko00600,ko00830,ko00860,ko00980,ko00982,ko00983,ko01100,ko01110,ko05204,map00040,map00053,map00140,map00565,map00600,map00830,map00860,map00980,map00982,map00983,map01100,map01110,map05204	M00014,M00067,M00129	R01383,R01500,R02358,R02389,R02478,R02502,R02902,R03091,R04322,R04352,R04353,R04354,R04683,R06277,R07106,R08259,R08261,R08262,R08263,R08615,R09426,R09427,R09428,R10804
1	28	Over	TRINITY_DN15_c0_g1_i2	1881	TRINITY_DN15_c0_g1_i2.p1	626	3prime_partial	32.9	4316.07	-5.04037	0.717609	-7.02384	2.15858e-12	9.16582e-10	2452.8	54.3	1443.4	36.6	Extracellular	Signal peptide							136037.KDR21644	9.51e-193	569	28IXN@1|root,2QR98@2759|Eukaryota,39EAC@33154|Opisthokonta,3BKWQ@33208|Metazoa,3D43U@33213|Bilateria,41WK9@6656|Arthropoda,3SIQN@50557|Insecta	33208|Metazoa	S	Larval serum protein	Hemocyanin_C,Hemocyanin_M,Hemocyanin_N	-	GO:0000902,GO:0000904,GO:0005575,GO:0005576,GO:0005615,GO:0005616,GO:0006928,GO:0006935,GO:0007275,GO:0007399,GO:0007409,GO:0007411,GO:0008037,GO:0008038,GO:0008039,GO:0008045,GO:0008150,GO:0009605,GO:0009653,GO:0009987,GO:0016043,GO:0016201,GO:0022008,GO:0030030,GO:0030154,GO:0030182,GO:0031175,GO:0032501,GO:0032502,GO:0032989,GO:0032990,GO:0032991,GO:0040011,GO:0042221,GO:0042330,GO:0044421,GO:…	-	-	0	0	0	0	0	0	0	0	-	-	-
1	29	Over	TRINITY_DN15_c0_g1_i4	2581	TRINITY_DN15_c0_g1_i4.p1	676	complete	22.7	12762.7	-4.50665	0.787006	-5.72632	1.02633e-08	2.28688e-06	5041.9	159.6	3286.6	133	Extracellular	Signal peptide							136037.KDR21644	1.77e-220	642	28IXN@1|root,2QR98@2759|Eukaryota,39EAC@33154|Opisthokonta,3BKWQ@33208|Metazoa,3D43U@33213|Bilateria,41WK9@6656|Arthropoda,3SIQN@50557|Insecta	33208|Metazoa	S	Larval serum protein	Hemocyanin_C,Hemocyanin_M,Hemocyanin_N	-	GO:0000902,GO:0000904,GO:0005575,GO:0005576,GO:0005615,GO:0005616,GO:0006928,GO:0006935,GO:0007275,GO:0007399,GO:0007409,GO:0007411,GO:0008037,GO:0008038,GO:0008039,GO:0008045,GO:0008150,GO:0009605,GO:0009653,GO:0009987,GO:0016043,GO:0016201,GO:0022008,GO:0030030,GO:0030154,GO:0030182,GO:0031175,GO:0032501,GO:0032502,GO:0032989,GO:0032990,GO:0032991,GO:0040011,GO:0042221,GO:0042330,GO:0044421,GO:…	-	-	0	0	0	0	0	0	0	0	-	-	-
1	30	Over	TRINITY_DN15_c0_g1_i6	2580	TRINITY_DN15_c0_g1_i6.p1	676	complete	5.8	44066.7	-2.5416	0.671311	-3.78602	0.000153079	0.00797465	15488.8	1797.4	4075	1644.8	Extracellular	Signal peptide							136037.KDR21644	3.69e-225	654	28IXN@1|root,2QR98@2759|Eukaryota,39EAC@33154|Opisthokonta,3BKWQ@33208|Metazoa,3D43U@33213|Bilateria,41WK9@6656|Arthropoda,3SIQN@50557|Insecta	33208|Metazoa	S	Larval serum protein	Hemocyanin_C,Hemocyanin_M,Hemocyanin_N	-	GO:0000902,GO:0000904,GO:0005575,GO:0005576,GO:0005615,GO:0005616,GO:0006928,GO:0006935,GO:0007275,GO:0007399,GO:0007409,GO:0007411,GO:0008037,GO:0008038,GO:0008039,GO:0008045,GO:0008150,GO:0009605,GO:0009653,GO:0009987,GO:0016043,GO:0016201,GO:0022008,GO:0030030,GO:0030154,GO:0030182,GO:0031175,GO:0032501,GO:0032502,GO:0032989,GO:0032990,GO:0032991,GO:0040011,GO:0042221,GO:0042330,GO:0044421,GO:…	-	-	0	0	0	0	0	0	0	0	-	-	-
1	31	Over	TRINITY_DN15857_c2_g1_i2	1804	TRINITY_DN15857_c2_g1_i2.p1	523	complete	6.8	39.3009	-2.76372	0.616894	-4.48005	7.46248e-06	0.000711624	20.8	2.1	5.7	1.4	Endoplasmic reticulum	Signal peptide|Transmembrane domain							136037.KDR20346	4.5e-224	634	KOG1192@1|root,KOG1192@2759|Eukaryota,38B62@33154|Opisthokonta,3BDT1@33208|Metazoa,3CY8Z@33213|Bilateria,41XIT@6656|Arthropoda,3SZAE@50557|Insecta	33208|Metazoa	G	UDP-glucoronosyl and UDP-glucosyl transferase	UDPGT	UGT2A1	GO:0001523,GO:0001889,GO:0001972,GO:0002237,GO:0002526,GO:0003008,GO:0003674,GO:0003824,GO:0004857,GO:0005080,GO:0005488,GO:0005496,GO:0005501,GO:0005504,GO:0005515,GO:0005575,GO:0005622,GO:0005623,GO:0005634,GO:0005635,GO:0005640,GO:0005737,GO:0005783,GO:0005789,GO:0005886,GO:0005887,GO:0005975,GO:0005996,GO:0006063,GO:0006082,GO:0006109,GO:0006629,GO:0006631,GO:0006706,GO:0006711,GO:0006720,GO:…	2.4.1.17,2.4.1.47	ko:K00699,ko:K04628	K00699	UGT	glucuronosyltransferase [EC:2.4.1.17]	K04628	CGT	ceramide galactosyltransferase [EC:2.4.1.47]	0	0	ko00040,ko00053,ko00140,ko00565,ko00600,ko00830,ko00860,ko00980,ko00982,ko00983,ko01100,ko01110,ko05204,map00040,map00053,map00140,map00565,map00600,map00830,map00860,map00980,map00982,map00983,map01100,map01110,map05204	M00014,M00067,M00129	R01383,R01500,R02358,R02389,R02478,R02502,R02902,R03091,R04322,R04352,R04353,R04354,R04683,R06277,R07106,R08259,R08261,R08262,R08263,R08615,R09426,R09427,R09428,R10804
1	32	Over	TRINITY_DN15904_c0_g1_i4	2482	TRINITY_DN15904_c0_g1_i4.p1	587	complete	20.1	15.896	-4.32578	0.826575	-5.23338	1.66442e-07	2.65658e-05	6.4	0.2	2	0.3	Cytoplasm	Nuclear localization signal							136037.KDR16593	9.2e-289	802	KOG0324@1|root,KOG0324@2759|Eukaryota,38YMV@33154|Opisthokonta,3BI97@33208|Metazoa,3CWM6@33213|Bilateria,41WUZ@6656|Arthropoda,3SKFU@50557|Insecta	33208|Metazoa	S	peptidase activity	Peptidase_C97	DESI1	GO:0003008,GO:0003012,GO:0003674,GO:0005488,GO:0005515,GO:0008150,GO:0032501,GO:0042802	-	-	0	0	0	0	0	0	0	0	-	-	-
1	33	Over	TRINITY_DN1600_c0_g1_i2	2818	TRINITY_DN1600_c0_g1_i2.p1	601	complete	3.7	161.223	-1.88756	0.486819	-3.87733	0.000105611	0.00618205	47.6	9	15.1	4.8	Endoplasmic reticulum								136037.KDR20669	0	931	28MTR@1|root,2QUC0@2759|Eukaryota,38F7J@33154|Opisthokonta,3CPI8@33208|Metazoa,3CY7J@33213|Bilateria,42AQZ@6656|Arthropoda,3SIWW@50557|Insecta	33208|Metazoa	0	-	-	-	-	-	-	0	0	0	0	0	0	0	0	-	-	-
1	34	Over	TRINITY_DN1601_c0_g1_i7	1233	TRINITY_DN1601_c0_g1_i7.p1	283	complete	2.8	274.211	-1.49105	0.429963	-3.46786	0.000524618	0.0196448	186.5	44.5	67.1	8.1	Extracellular	Signal peptide							136037.KDR10087	2.84e-34	131	2E93Y@1|root,2SFHR@2759|Eukaryota,3AAH2@33154|Opisthokonta,3BV1N@33208|Metazoa,3DBKW@33213|Bilateria,423JQ@6656|Arthropoda,3SRS0@50557|Insecta	33208|Metazoa	S	C-type lectin (CTL) or carbohydrate-recognition domain (CRD)	Lectin_C	-	-	-	-	0	0	0	0	0	0	0	0	-	-	-
1	35	Over	TRINITY_DN1620_c0_g1_i10	1453	TRINITY_DN1620_c0_g1_i10.p1	262	complete	51.3	5.22908	-5.67979	1.82115	-3.1188	0.00181592	0.048858	4.1	0	2.8	0	Cytoplasm								7176.CPIJ017598-PA	7.12e-48	177	COG5422@1|root,KOG3523@2759|Eukaryota,38CD2@33154|Opisthokonta,3BEE7@33208|Metazoa,3CTY1@33213|Bilateria,41WKR@6656|Arthropoda,3SIHS@50557|Insecta,45091@7147|Diptera,45BIG@7148|Nematocera	33208|Metazoa	T	Guanine nucleotide exchange factor	PH,RhoGEF,SH3_1,SH3_9	ARHGEF26	GO:0001505,GO:0001654,GO:0001944,GO:0002009,GO:0002165,GO:0002252,GO:0002376,GO:0003674,GO:0005085,GO:0005088,GO:0005089,GO:0005102,GO:0005488,GO:0005515,GO:0005575,GO:0005622,GO:0005623,GO:0005737,GO:0005829,GO:0006582,GO:0006725,GO:0006928,GO:0006935,GO:0006950,GO:0006952,GO:0006955,GO:0007154,GO:0007165,GO:0007166,GO:0007167,GO:0007169,GO:0007186,GO:0007275,GO:0007399,GO:0007423,GO:0007444,GO:…	-	ko:K07525,ko:K13744,ko:K20687,ko:K20688	K07525	NGEF	neuronal guanine nucleotide exchange factor	K13744	ARHGEF26	Rho guanine nucleotide exchange factor 26	K20687	K20688	ko04360,ko05100,map04360,map05100	-	-
1	36	Over	TRINITY_DN16469_c0_g1_i10	4241	TRINITY_DN16469_c0_g1_i10.p1	492	complete	4.4	445.386	-2.153	0.55363	-3.88887	0.000100711	0.00606014	88.7	13.9	23.5	8.7	Cytoplasm	Nuclear export signal							121225.PHUM467590-PA	0	920	COG5069@1|root,KOG1700@2759|Eukaryota,38DY3@33154|Opisthokonta,3B9E8@33208|Metazoa,3CUCI@33213|Bilateria,41X82@6656|Arthropoda,3SHFY@50557|Insecta,3EAYY@33342|Paraneoptera	33208|Metazoa	TZ	Zinc-binding domain present in Lin-11, Isl-1, Mec-3.	LIM	CSRP1	GO:0001085,GO:0001725,GO:0002026,GO:0003008,GO:0003012,GO:0003013,GO:0003015,GO:0003300,GO:0003674,GO:0005198,GO:0005488,GO:0005515,GO:0005575,GO:0005622,GO:0005623,GO:0005634,GO:0005654,GO:0005737,GO:0005856,GO:0005912,GO:0005924,GO:0005925,GO:0006355,GO:0006357,GO:0006873,GO:0006874,GO:0006875,GO:0006936,GO:0006941,GO:0006996,GO:0007010,GO:0007275,GO:0007399,GO:0007507,GO:0008015,GO:0008016,GO:…	-	ko:K09377	K09377	CSRP	cysteine and glycine-rich protein	0	0	0	0	0	-	-	-
1	37	Over	TRINITY_DN16469_c0_g1_i3	1652	TRINITY_DN16469_c0_g1_i3.p1	96	complete	3.6	429.936	-1.83921	0.509546	-3.6095	0.000306786	0.0130024	222.9	42.9	96.6	19.7	Cytoplasm								13249.RPRC002639-PA	5.42e-64	195	COG5069@1|root,KOG1700@2759|Eukaryota,38DY3@33154|Opisthokonta,3B9E8@33208|Metazoa,3CUCI@33213|Bilateria,41X82@6656|Arthropoda,3SHFY@50557|Insecta,3EAYY@33342|Paraneoptera	33208|Metazoa	TZ	Zinc-binding domain present in Lin-11, Isl-1, Mec-3.	LIM	CSRP1	GO:0001085,GO:0001725,GO:0002026,GO:0003008,GO:0003012,GO:0003013,GO:0003015,GO:0003300,GO:0003674,GO:0005198,GO:0005488,GO:0005515,GO:0005575,GO:0005622,GO:0005623,GO:0005634,GO:0005654,GO:0005737,GO:0005856,GO:0005912,GO:0005924,GO:0005925,GO:0006355,GO:0006357,GO:0006873,GO:0006874,GO:0006875,GO:0006936,GO:0006941,GO:0006996,GO:0007010,GO:0007275,GO:0007399,GO:0007507,GO:0008015,GO:0008016,GO:…	-	ko:K09377	K09377	CSRP	cysteine and glycine-rich protein	0	0	0	0	0	-	-	-
1	38	Over	TRINITY_DN16679_c0_g1_i9	2350	TRINITY_DN16679_c0_g1_i9.p1	615	complete	3.7	25.671	-1.87495	0.483038	-3.88157	0.000103784	0.00614646	9.2	1.8	3	0.7	Cytoplasm	Peroxisomal targeting signal							136037.KDR13370	0	991	COG0308@1|root,KOG1047@2759|Eukaryota,38DQ5@33154|Opisthokonta,3BF5Y@33208|Metazoa,3CSDH@33213|Bilateria,41U2V@6656|Arthropoda,3SHNR@50557|Insecta	33208|Metazoa	EIOV	Belongs to the peptidase M1 family	Leuk-A4-hydro_C,Peptidase_M1	LTA4H	GO:0001676,GO:0001775,GO:0002252,GO:0002263,GO:0002274,GO:0002275,GO:0002283,GO:0002366,GO:0002376,GO:0002443,GO:0002444,GO:0002446,GO:0003674,GO:0003824,GO:0004177,GO:0004301,GO:0004463,GO:0005488,GO:0005575,GO:0005576,GO:0005622,GO:0005623,GO:0005634,GO:0005654,GO:0005737,GO:0005829,GO:0006082,GO:0006508,GO:0006518,GO:0006629,GO:0006631,GO:0006633,GO:0006690,GO:0006691,GO:0006807,GO:0006810,GO:…	3.3.2.6	ko:K01254	K01254	LTA4H	leukotriene-A4 hydrolase [EC:3.3.2.6]	0	0	0	0	0	ko00590,ko01100,map00590,map01100	-	R03057
1	39	Over	TRINITY_DN1727_c0_g1_i8	3317	TRINITY_DN1727_c0_g1_i8.p1	856	complete	16.9	23.0865	-4.08062	1.27544	-3.19939	0.00137721	0.0398381	6.8	0.3	3.5	0.7	Peroxisome	Signal peptide|Transmembrane domain|Peroxisomal targeting signal							136037.KDR13783	0	1326	COG1257@1|root,KOG2480@2759|Eukaryota,38D74@33154|Opisthokonta,3BF6P@33208|Metazoa,3CYUH@33213|Bilateria,41W0E@6656|Arthropoda,3SKIP@50557|Insecta	33208|Metazoa	I	hydroxymethylglutaryl-CoA reductase (NADPH) activity. It is involved in the biological process described with isoprenoid biosynthetic process	HMG-CoA_red,Sterol-sensing	HMGCR	GO:0000003,GO:0000166,GO:0001932,GO:0001933,GO:0001934,GO:0002791,GO:0002792,GO:0003006,GO:0003008,GO:0003013,GO:0003018,GO:0003674,GO:0003824,GO:0004420,GO:0005488,GO:0005515,GO:0005575,GO:0005622,GO:0005623,GO:0005737,GO:0005777,GO:0005778,GO:0005783,GO:0005789,GO:0006066,GO:0006469,GO:0006629,GO:0006644,GO:0006694,GO:0006695,GO:0006720,GO:0006721,GO:0006732,GO:0006733,GO:0006743,GO:0006793,GO:…	1.1.1.34	ko:K00021	K00021	HMGCR	hydroxymethylglutaryl-CoA reductase (NADPH) [EC:1.1.1.34]	0	0	0	0	0	ko00900,ko01100,ko01110,ko01130,ko04152,ko04976,map00900,map01100,map01110,map01130,map04152,map04976	M00095	R02082
1	40	Over	TRINITY_DN1732_c0_g1_i8	5734	TRINITY_DN1732_c0_g1_i8.p1	1826	complete	5.1	14.7628	-2.33944	0.679091	-3.44496	0.00057115	0.0206984	2.2	0.3	0.8	0.2	Cell membrane|Lysosome/Vacuole	Transmembrane domain							136037.KDR09980	0	2213	COG0664@1|root,COG1132@1|root,KOG0054@2759|Eukaryota,KOG0614@2759|Eukaryota,38CH6@33154|Opisthokonta,3BA19@33208|Metazoa,3CSDY@33213|Bilateria,41WAI@6656|Arthropoda,3SFZC@50557|Insecta	33208|Metazoa	Q	It is involved in the biological process described with	ABC_membrane,ABC_tran	Sur	GO:0001666,GO:0003674,GO:0003824,GO:0005215,GO:0005575,GO:0005623,GO:0005886,GO:0005887,GO:0006810,GO:0006950,GO:0007275,GO:0007507,GO:0008150,GO:0009628,GO:0015399,GO:0015405,GO:0016020,GO:0016021,GO:0016462,GO:0016787,GO:0016817,GO:0016818,GO:0016887,GO:0017111,GO:0022804,GO:0022857,GO:0031224,GO:0031226,GO:0032501,GO:0032502,GO:0036293,GO:0042623,GO:0042626,GO:0043492,GO:0044425,GO:0044459,GO:…	-	ko:K05032,ko:K05033	K05032	ABCC8	ATP-binding cassette subfamily C (CFTR/MRP) member 8	K05033	ABCC9	ATP-binding cassette subfamily C (CFTR/MRP) member 9	0	0	ko02010,ko04911,ko04930,map02010,map04911,map04930	-	-
1	41	Over	TRINITY_DN1732_c4_g1_i1	4905	TRINITY_DN1732_c4_g1_i1.p1	1308	complete	4.6	67.6464	-2.19378	0.448607	-4.89021	1.00728e-06	0.000133346	11.8	1.8	4.2	1	Cell membrane	Transmembrane domain							7460.GB55378-PA	0	1556	COG1132@1|root,KOG0055@2759|Eukaryota,38E88@33154|Opisthokonta,3B958@33208|Metazoa,3CVKH@33213|Bilateria,41WNN@6656|Arthropoda,3SIMD@50557|Insecta,46JJR@7399|Hymenoptera	33208|Metazoa	Q	Multidrug resistance protein homolog 49-like	ABC_membrane,ABC_tran	pgp-2	GO:0000003,GO:0001666,GO:0003008,GO:0003014,GO:0003674,GO:0003824,GO:0005215,GO:0005575,GO:0005622,GO:0005623,GO:0005737,GO:0005886,GO:0005887,GO:0005911,GO:0005918,GO:0005919,GO:0006810,GO:0006855,GO:0006928,GO:0006950,GO:0006996,GO:0007275,GO:0007276,GO:0007399,GO:0008150,GO:0008354,GO:0008559,GO:0009628,GO:0009636,GO:0009987,GO:0010001,GO:0010876,GO:0015238,GO:0015399,GO:0015405,GO:0015562,GO:…	3.6.3.44	ko:K05658	K05658	ABCB1	ATP-binding cassette, subfamily B (MDR/TAP), member 1 [EC:7.6.2.2]	0	0	0	0	0	ko02010,ko04976,ko05206,ko05226,map02010,map04976,map05206,map05226	-	-
1	42	Over	TRINITY_DN17361_c1_g1_i1	2017	TRINITY_DN17361_c1_g1_i1.p1	302	complete	2	4451.45	-1.00264	0.286327	-3.50172	0.000462267	0.0177835	1584.2	544.4	148.9	132.7	Mitochondrion	Transmembrane domain							136037.KDR12333	2.23e-202	561	KOG0749@1|root,KOG0749@2759|Eukaryota,38B82@33154|Opisthokonta,3B9K3@33208|Metazoa,3CTAF@33213|Bilateria,41TUM@6656|Arthropoda,3SK6U@50557|Insecta	33208|Metazoa	C	Belongs to the mitochondrial carrier (TC 2.A.29) family	Mito_carr	slc25a4	GO:0000003,GO:0000295,GO:0001508,GO:0003006,GO:0003254,GO:0003674,GO:0005215,GO:0005346,GO:0005347,GO:0005471,GO:0005575,GO:0005622,GO:0005623,GO:0005737,GO:0005739,GO:0005740,GO:0005743,GO:0006140,GO:0006810,GO:0006811,GO:0006820,GO:0006839,GO:0006855,GO:0006862,GO:0006873,GO:0006874,GO:0006875,GO:0006950,GO:0006979,GO:0006996,GO:0007005,GO:0007006,GO:0007154,GO:0007267,GO:0007268,GO:0007275,GO:…	-	ko:K05863	K05863	SLC25A4S	solute carrier family 25 (mitochondrial adenine nucleotide translocator), member 4/5/6/31	0	0	0	0	0	ko04020,ko04022,ko04217,ko04218,ko05012,ko05016,ko05166,map04020,map04022,map04217,map04218,map05012,map05016,map05166	-	-
1	43	Over	TRINITY_DN1748_c0_g1_i2	1415	TRINITY_DN1748_c0_g1_i2.p1	306	complete	6	16.6194	-2.58353	0.672548	-3.84141	0.000122328	0.00669828	11.2	1.3	5.2	0.9	Mitochondrion	Mitochondrial transit peptide							136037.KDR22576	1.1e-113	337	COG1024@1|root,KOG1680@2759|Eukaryota,38F58@33154|Opisthokonta,3BC2F@33208|Metazoa,3D1QF@33213|Bilateria,41UX9@6656|Arthropoda,3SI6C@50557|Insecta	33208|Metazoa	I	Belongs to the enoyl-CoA hydratase isomerase family	ECH_1	ECHS1	GO:0003674,GO:0003824,GO:0004300,GO:0005575,GO:0005622,GO:0005623,GO:0005737,GO:0005739,GO:0005759,GO:0006082,GO:0006629,GO:0006631,GO:0006635,GO:0008150,GO:0008152,GO:0009056,GO:0009062,GO:0009987,GO:0016042,GO:0016054,GO:0016829,GO:0016835,GO:0016836,GO:0019395,GO:0019752,GO:0030258,GO:0031974,GO:0032787,GO:0034440,GO:0043226,GO:0043227,GO:0043229,GO:0043231,GO:0043233,GO:0043436,GO:0044237,GO:…	4.2.1.17	ko:K07511	K07511	ECHS1	enoyl-CoA hydratase [EC:4.2.1.17]	0	0	0	0	0	ko00062,ko00071,ko00280,ko00310,ko00380,ko00410,ko00627,ko00640,ko00650,ko00930,ko01100,ko01110,ko01120,ko01130,ko01200,ko01212,map00062,map00071,map00280,map00310,map00380,map00410,map00627,map00640,map00650,map00930,map01100,map01110,map01120,map01130,map01200,map01212	M00013,M00032,M00085,M00087	R02685,R03026,R03045,R04137,R04170,R04204,R04224,R04738,R04740,R04744,R04746,R04749,R05595,R06942
1	44	Over	TRINITY_DN17656_c1_g1_i4	1355	TRINITY_DN17656_c1_g1_i4.p1	326	complete	153.6	15.6799	-7.26258	1.86807	-3.88775	0.000101179	0.00606457	13	0	9.6	0	Cell membrane	Transmembrane domain							136037.KDR24109	1.95e-140	414	KOG0255@1|root,KOG0255@2759|Eukaryota,39UVP@33154|Opisthokonta,3BMGJ@33208|Metazoa,3D0VW@33213|Bilateria,41WTF@6656|Arthropoda,3SGYS@50557|Insecta	33208|Metazoa	K	It is involved in the biological process described with transmembrane transport	MFS_1,Sugar_tr	-	GO:0003674,GO:0003824,GO:0005575,GO:0006629,GO:0008150,GO:0008152,GO:0016020,GO:0016021,GO:0016298,GO:0016787,GO:0016788,GO:0031224,GO:0044238,GO:0044425,GO:0071704	-	-	0	0	0	0	0	0	0	0	-	-	-
1	45	Over	TRINITY_DN17656_c1_g1_i5	1692	TRINITY_DN17656_c1_g1_i5.p1	477	complete	5.7	256.534	-2.49958	0.710775	-3.51669	0.000436963	0.0170727	142.2	15.9	57.3	12.1	Cell membrane	Transmembrane domain							136037.KDR24109	5.63e-208	592	KOG0255@1|root,KOG0255@2759|Eukaryota,39UVP@33154|Opisthokonta,3BMGJ@33208|Metazoa,3D0VW@33213|Bilateria,41WTF@6656|Arthropoda,3SGYS@50557|Insecta	33208|Metazoa	K	It is involved in the biological process described with transmembrane transport	MFS_1,Sugar_tr	-	GO:0003674,GO:0003824,GO:0005575,GO:0006629,GO:0008150,GO:0008152,GO:0016020,GO:0016021,GO:0016298,GO:0016787,GO:0016788,GO:0031224,GO:0044238,GO:0044425,GO:0071704	-	-	0	0	0	0	0	0	0	0	-	-	-
1	46	Over	TRINITY_DN17656_c1_g1_i6	2902	TRINITY_DN17656_c1_g1_i6.p1	537	complete	10.2	258.837	-3.3487	0.865386	-3.8696	0.000109015	0.00629071	85.8	5.2	33.6	4.6	Cell membrane	Transmembrane domain							136037.KDR24109	9.94e-239	673	KOG0255@1|root,KOG0255@2759|Eukaryota,39UVP@33154|Opisthokonta,3BMGJ@33208|Metazoa,3D0VW@33213|Bilateria,41WTF@6656|Arthropoda,3SGYS@50557|Insecta	33208|Metazoa	K	It is involved in the biological process described with transmembrane transport	MFS_1,Sugar_tr	-	GO:0003674,GO:0003824,GO:0005575,GO:0006629,GO:0008150,GO:0008152,GO:0016020,GO:0016021,GO:0016298,GO:0016787,GO:0016788,GO:0031224,GO:0044238,GO:0044425,GO:0071704	-	-	0	0	0	0	0	0	0	0	-	-	-
1	47	Over	TRINITY_DN1769_c0_g1_i28	1991	TRINITY_DN1769_c0_g1_i28.p1	640	3prime_partial	8.6	20.4422	-3.10606	0.811337	-3.82832	0.000129021	0.00689697	10.2	0.9	4.4	1.2	Cytoplasm	Nuclear localization signal							7425.NV11575-PA	6.31e-167	517	KOG4240@1|root,KOG4240@2759|Eukaryota,39MW4@33154|Opisthokonta,3CPFS@33208|Metazoa,3E5KT@33213|Bilateria	2759|Eukaryota	Z	Spectrin repeats	I-set,Pkinase,RhoGEF,fn3	-	GO:0003674,GO:0005488,GO:0005515,GO:0005523,GO:0005575,GO:0005622,GO:0005623,GO:0005737,GO:0006996,GO:0007010,GO:0007525,GO:0007527,GO:0008092,GO:0008104,GO:0008150,GO:0009653,GO:0009987,GO:0010927,GO:0016043,GO:0019899,GO:0019900,GO:0019901,GO:0022607,GO:0030016,GO:0030017,GO:0030029,GO:0030036,GO:0030154,GO:0030239,GO:0031032,GO:0031430,GO:0031672,GO:0032502,GO:0032989,GO:0033036,GO:0033365,GO:…	2.7.11.1	ko:K12567	K12567	TTN	titin [EC:2.7.11.1]	0	0	0	0	0	ko05410,ko05414,map05410,map05414	-	-
1	48	Over	TRINITY_DN18150_c0_g2_i1	6499	TRINITY_DN18150_c0_g2_i1.p1	891	complete	2.5	1411.84	-1.34599	0.307479	-4.3775	1.20049e-05	0.0010533	158.6	45.2	21.4	22.3	Cytoplasm	Nuclear export signal							7070.TC007894-PA	0	1680	COG5069@1|root,KOG0035@2759|Eukaryota,38C3U@33154|Opisthokonta,3BB7X@33208|Metazoa,3CV9K@33213|Bilateria,41TDS@6656|Arthropoda,3SJDU@50557|Insecta	33208|Metazoa	Z	calcium ion binding. It is involved in the biological process described with actin crosslink formation	CH,EF-hand_6,EFhand_Ca_insen,Spectrin	-	GO:0003674,GO:0003779,GO:0005488,GO:0005515,GO:0005575,GO:0005622,GO:0005623,GO:0005737,GO:0005856,GO:0005865,GO:0005912,GO:0005924,GO:0005925,GO:0006996,GO:0007010,GO:0007015,GO:0007016,GO:0008092,GO:0008104,GO:0008150,GO:0009653,GO:0009987,GO:0010927,GO:0015629,GO:0016043,GO:0022607,GO:0030016,GO:0030017,GO:0030018,GO:0030029,GO:0030036,GO:0030054,GO:0030055,GO:0030154,GO:0030239,GO:0031032,GO:…	-	ko:K05699,ko:K21073	K05699	ACTN1_4	actinin alpha 1/4	K21073	ACTN2_3	actinin alpha 2/3	0	0	ko04510,ko04520,ko04530,ko04670,ko04810,ko05146,ko05203,ko05322,ko05412,map04510,map04520,map04530,map04670,map04810,map05146,map05203,map05322,map05412	-	-
1	49	Over	TRINITY_DN1867_c0_g1_i1	4156	TRINITY_DN1867_c0_g1_i1.p1	388	complete	118.1	12.0454	-6.88384	1.88939	-3.64342	0.000269038	0.0119658	3.1	0	2.9	0	Cytoplasm|Nucleus	Nuclear export signal							136037.KDR23337	3e-256	705	COG5024@1|root,KOG0653@2759|Eukaryota,39TTW@33154|Opisthokonta,3BBC1@33208|Metazoa,3CXEA@33213|Bilateria,41WWZ@6656|Arthropoda,3SJP5@50557|Insecta	33208|Metazoa	D	Belongs to the cyclin family	Cyclin_N	CCNG2	GO:0000003,GO:0000280,GO:0000711,GO:0000731,GO:0001932,GO:0003674,GO:0004857,GO:0004864,GO:0005575,GO:0005622,GO:0005623,GO:0005634,GO:0005694,GO:0005700,GO:0005737,GO:0006139,GO:0006259,GO:0006281,GO:0006302,GO:0006725,GO:0006807,GO:0006950,GO:0006974,GO:0006996,GO:0007049,GO:0007143,GO:0007276,GO:0007292,GO:0007346,GO:0008150,GO:0008152,GO:0008593,GO:0009058,GO:0009059,GO:0009888,GO:0009892,GO:…	-	ko:K10146	K10146	CCNG2	cyclin G2	0	0	0	0	0	ko04068,ko04115,map04068,map04115	-	-
1	50	Over	TRINITY_DN19044_c0_g1_i1	3533	TRINITY_DN19044_c0_g1_i1.p1	778	complete	3.7	46.2903	-1.87957	0.601825	-3.12312	0.00178947	0.0483977	10.6	2	2.1	1.3	Cell membrane|Lysosome/Vacuole	Signal peptide|Transmembrane domain							7029.ACYPI086610-PA	3.36e-109	347	COG3590@1|root,KOG3624@2759|Eukaryota,39RNY@33154|Opisthokonta,3BM2F@33208|Metazoa,3CVQU@33213|Bilateria,41TXG@6656|Arthropoda,3SJUG@50557|Insecta	33208|Metazoa	E	metalloendopeptidase activity. It is involved in the biological process described with proteolysis	Peptidase_M13,Peptidase_M13_N	Nep5	GO:0003674,GO:0003824,GO:0005575,GO:0006508,GO:0006807,GO:0008150,GO:0008152,GO:0008233,GO:0008237,GO:0016020,GO:0016021,GO:0016787,GO:0019538,GO:0031224,GO:0043170,GO:0044238,GO:0044425,GO:0070011,GO:0071704,GO:0140096,GO:1901564	-	-	0	0	0	0	0	0	0	0	-	-	-
1	51	Over	TRINITY_DN19215_c0_g2_i2	6985	TRINITY_DN19215_c0_g2_i2.p1	1795	complete	2.9	52.8806	-1.52155	0.300604	-5.06163	4.1568e-07	6.11431e-05	5.7	1.4	0.7	0.3	Cytoplasm	Nuclear export signal							136037.KDR13172	0	2536	KOG3570@1|root,KOG3570@2759|Eukaryota,38EVU@33154|Opisthokonta,3BA3M@33208|Metazoa,3CTHU@33213|Bilateria,41WPV@6656|Arthropoda,3SJCD@50557|Insecta	33208|Metazoa	T	death domain	DENN,uDENN	MADD	GO:0000003,GO:0000187,GO:0001505,GO:0001932,GO:0001934,GO:0001956,GO:0001959,GO:0002791,GO:0002792,GO:0003008,GO:0003674,GO:0005085,GO:0005088,GO:0005102,GO:0005123,GO:0005126,GO:0005488,GO:0005515,GO:0005575,GO:0005622,GO:0005623,GO:0005634,GO:0005737,GO:0005829,GO:0005886,GO:0006810,GO:0006836,GO:0006869,GO:0006915,GO:0006996,GO:0007010,GO:0007154,GO:0007165,GO:0007166,GO:0007267,GO:0007268,GO:…	6.1.1.18	ko:K01886	K01886	QARS	glutaminyl-tRNA synthetase [EC:6.1.1.18]	0	0	0	0	0	ko00970,ko01100,map00970,map01100	M00359,M00360	R03652
1	52	Over	TRINITY_DN1930_c0_g1_i8	3193	TRINITY_DN1930_c0_g1_i8.p1	1054	3prime_partial	49.6	31.2789	-5.63193	1.11251	-5.06236	4.14097e-07	6.11431e-05	10	0.2	4.3	0.3	Endoplasmic reticulum|Golgi apparatus	Signal peptide							136037.KDR15395	0	1702	COG0526@1|root,KOG0191@2759|Eukaryota,39X8I@33154|Opisthokonta,3BE8T@33208|Metazoa,3D2HW@33213|Bilateria,41U6D@6656|Arthropoda,3SHE8@50557|Insecta	33208|Metazoa	O	It is involved in the biological process described with cell redox homeostasis	Thioredoxin,Thioredoxin_6	-	-	-	-	0	0	0	0	0	0	0	0	-	-	-
1	53	Over	TRINITY_DN19526_c0_g2_i1	2614	TRINITY_DN19526_c0_g2_i1.p1	720	complete	3.9	131.18	-1.95948	0.453605	-4.3198	1.56172e-05	0.00128272	42.3	7.3	17.4	1.7	Cell membrane	Transmembrane domain							136037.KDR21873	0	1053	KOG3626@1|root,KOG3626@2759|Eukaryota,38DV9@33154|Opisthokonta,3BJ5V@33208|Metazoa,3CS1Q@33213|Bilateria,41XFQ@6656|Arthropoda,3SG5H@50557|Insecta	33208|Metazoa	P	Solute carrier organic anion transporter family member	Kazal_2,OATP	-	GO:0003008,GO:0003014,GO:0003674,GO:0005215,GO:0005575,GO:0005623,GO:0005886,GO:0005887,GO:0006810,GO:0006811,GO:0006820,GO:0007588,GO:0008150,GO:0008509,GO:0008514,GO:0009636,GO:0015075,GO:0015291,GO:0015347,GO:0015711,GO:0016020,GO:0016021,GO:0016323,GO:0022804,GO:0022857,GO:0031224,GO:0031226,GO:0032501,GO:0034220,GO:0042221,GO:0043252,GO:0044425,GO:0044459,GO:0044464,GO:0046903,GO:0050896,GO:…	-	-	0	0	0	0	0	0	0	0	-	-	-
1	54	Over	TRINITY_DN19635_c0_g1_i4	1098	TRINITY_DN19635_c0_g1_i4.p1	259	complete	5.1	22.6473	-2.36401	0.68649	-3.44362	0.000573988	0.0207258	20.1	2.8	4.9	2	Endoplasmic reticulum	Mitochondrial transit peptide							136037.KDR22627	2.57e-127	368	COG0020@1|root,KOG2818@2759|Eukaryota,39XNK@33154|Opisthokonta,3BMKR@33208|Metazoa,3CSWG@33213|Bilateria,420BU@6656|Arthropoda,3SNJW@50557|Insecta	33208|Metazoa	I	Nuclear undecaprenyl pyrophosphate synthase 1 homolog (S. cerevisiae)	Prenyltransf	NUS1	GO:0001525,GO:0001568,GO:0001944,GO:0002040,GO:0002790,GO:0003674,GO:0003824,GO:0004659,GO:0005575,GO:0005622,GO:0005623,GO:0005737,GO:0005783,GO:0005789,GO:0006066,GO:0006464,GO:0006486,GO:0006629,GO:0006720,GO:0006807,GO:0006810,GO:0007154,GO:0007165,GO:0007166,GO:0007167,GO:0007169,GO:0007275,GO:0008104,GO:0008150,GO:0008152,GO:0008299,GO:0008610,GO:0009058,GO:0009059,GO:0009100,GO:0009101,GO:…	2.5.1.87	ko:K19177	K19177	NUS1	dehydrodolichyl diphosphate syntase complex subunit NUS1 [EC:2.5.1.87]	0	0	0	0	0	ko00900,ko01110,map00900,map01110	-	R05556
1	55	Over	TRINITY_DN204_c0_g1_i19	5727	TRINITY_DN204_c0_g1_i19.p1	1520	complete	230.4	23.5241	-7.84793	1.87869	-4.17734	2.94938e-05	0.00223514	4.2	0	2.8	0	Nucleus	Nuclear localization signal|Nuclear export signal							136037.KDR23975	4.1e-230	718	28KEG@1|root,2QSVE@2759|Eukaryota,38CK3@33154|Opisthokonta,3BDZ7@33208|Metazoa,3CW9D@33213|Bilateria,41XS0@6656|Arthropoda,3SFTX@50557|Insecta	33208|Metazoa	S	Sequence-specific DNA binding transcription factor activity. It is involved in the biological process described with regulation of	RHD_DNA_bind,RHD_dimer	NFAT5	GO:0000976,GO:0000977,GO:0000978,GO:0000981,GO:0000982,GO:0000987,GO:0001012,GO:0001067,GO:0001077,GO:0001228,GO:0001505,GO:0001816,GO:0003008,GO:0003674,GO:0003676,GO:0003677,GO:0003690,GO:0003700,GO:0005488,GO:0005575,GO:0005622,GO:0005623,GO:0005634,GO:0005654,GO:0005737,GO:0005829,GO:0006139,GO:0006351,GO:0006355,GO:0006357,GO:0006366,GO:0006725,GO:0006807,GO:0006950,GO:0006970,GO:0007154,GO:…	-	ko:K17335	K17335	NFAT5	nuclear factor of activated T-cells 5	0	0	0	0	0	-	-	-
1	56	Over	TRINITY_DN206_c21_g1_i1	1954	TRINITY_DN206_c21_g1_i1.p1	453	complete	6.5	1558.63	-2.68997	0.725065	-3.70997	0.000207286	0.00990439	750.5	91.2	178.1	96.7	Cytoplasm	Nuclear export signal							136037.KDR21968	2,6e-312	852	COG3186@1|root,KOG3820@2759|Eukaryota,38G6R@33154|Opisthokonta,3BB8B@33208|Metazoa,3CUNE@33213|Bilateria,41TFI@6656|Arthropoda,3SG0X@50557|Insecta	33208|Metazoa	E	It is involved in the biological process described with L-phenylalanine catabolic process	ACT,Biopterin_H	PAH	GO:0000003,GO:0001505,GO:0003008,GO:0003674,GO:0003824,GO:0004497,GO:0004505,GO:0004510,GO:0005488,GO:0005506,GO:0005515,GO:0005575,GO:0005622,GO:0005623,GO:0005737,GO:0005829,GO:0006066,GO:0006082,GO:0006464,GO:0006520,GO:0006558,GO:0006559,GO:0006568,GO:0006569,GO:0006570,GO:0006571,GO:0006576,GO:0006582,GO:0006584,GO:0006586,GO:0006725,GO:0006726,GO:0006732,GO:0006807,GO:0006950,GO:0006979,GO:…	1.14.16.1	ko:K00500	K00500	phhA	phenylalanine-4-hydroxylase [EC:1.14.16.1]	0	0	0	0	0	ko00360,ko00400,ko00790,ko01100,ko01230,map00360,map00400,map00790,map01100,map01230	-	R01795,R07211
1	57	Over	TRINITY_DN21052_c0_g1_i1	3342	TRINITY_DN21052_c0_g1_i1.p1	694	complete	4.5	27.694	-2.15411	0.620682	-3.47055	0.000519394	0.0195141	7.2	1.2	4.4	0.7	Extracellular	Signal peptide							136037.KDR24107	0	1040	KOG2408@1|root,KOG2408@2759|Eukaryota,38NH6@33154|Opisthokonta,3BHBR@33208|Metazoa,3D4XT@33213|Bilateria,41U77@6656|Arthropoda,3SI0M@50557|Insecta	33208|Metazoa	S	heme binding. It is involved in the biological process described with response to oxidative stress	An_peroxidase	Pxd	GO:0000003,GO:0002064,GO:0002065,GO:0002066,GO:0003006,GO:0003674,GO:0003824,GO:0004601,GO:0005575,GO:0005623,GO:0007276,GO:0007281,GO:0007292,GO:0007304,GO:0007306,GO:0008150,GO:0008152,GO:0009636,GO:0009653,GO:0009888,GO:0009987,GO:0010033,GO:0010927,GO:0016043,GO:0016209,GO:0016491,GO:0016684,GO:0019953,GO:0022412,GO:0022414,GO:0022607,GO:0030154,GO:0030312,GO:0030703,GO:0030707,GO:0030855,GO:…	-	-	0	0	0	0	0	0	0	0	-	-	-
1	58	Over	TRINITY_DN2117_c0_g1_i3	1800	TRINITY_DN2117_c0_g1_i3.p1	534	complete	5.1	71.2602	-2.34877	0.447978	-5.24303	1.57959e-07	2.5948e-05	36.4	5.1	13.8	2.9	Endoplasmic reticulum	Signal peptide|Transmembrane domain							136037.KDR22771	3.17e-219	622	KOG1192@1|root,KOG1192@2759|Eukaryota,38B62@33154|Opisthokonta,3BDT1@33208|Metazoa,3CY8Z@33213|Bilateria,41U20@6656|Arthropoda,3SKRZ@50557|Insecta	33208|Metazoa	G	transferase activity, transferring hexosyl groups. It is involved in the biological process described with metabolic process	UDPGT	UGT2A1	GO:0001523,GO:0001889,GO:0001972,GO:0002237,GO:0002526,GO:0003008,GO:0003674,GO:0003824,GO:0004857,GO:0005080,GO:0005488,GO:0005496,GO:0005501,GO:0005504,GO:0005515,GO:0005575,GO:0005622,GO:0005623,GO:0005634,GO:0005635,GO:0005640,GO:0005737,GO:0005783,GO:0005789,GO:0005886,GO:0005887,GO:0005975,GO:0005996,GO:0006011,GO:0006063,GO:0006082,GO:0006109,GO:0006139,GO:0006629,GO:0006631,GO:0006706,GO:…	2.4.1.17,2.4.1.47	ko:K00699,ko:K04628	K00699	UGT	glucuronosyltransferase [EC:2.4.1.17]	K04628	CGT	ceramide galactosyltransferase [EC:2.4.1.47]	0	0	ko00040,ko00053,ko00140,ko00565,ko00600,ko00830,ko00860,ko00980,ko00982,ko00983,ko01100,ko01110,ko05204,map00040,map00053,map00140,map00565,map00600,map00830,map00860,map00980,map00982,map00983,map01100,map01110,map05204	M00014,M00067,M00129	R01383,R01500,R02358,R02389,R02478,R02502,R02902,R03091,R04322,R04352,R04353,R04354,R04683,R06277,R07106,R08259,R08261,R08262,R08263,R08615,R09426,R09427,R09428,R10804
1	59	Over	TRINITY_DN2117_c0_g1_i5	3117	TRINITY_DN2117_c0_g1_i5.p1	534	complete	28.1	40.2189	-4.81048	0.844178	-5.69842	1.2092e-08	2.59171e-06	13.1	0.4	3.8	0.5	Endoplasmic reticulum	Signal peptide|Transmembrane domain							136037.KDR22771	2.23e-219	623	KOG1192@1|root,KOG1192@2759|Eukaryota,38B62@33154|Opisthokonta,3BDT1@33208|Metazoa,3CY8Z@33213|Bilateria,41U20@6656|Arthropoda,3SKRZ@50557|Insecta	33208|Metazoa	G	transferase activity, transferring hexosyl groups. It is involved in the biological process described with metabolic process	UDPGT	UGT2A1	GO:0001523,GO:0001889,GO:0001972,GO:0002237,GO:0002526,GO:0003008,GO:0003674,GO:0003824,GO:0004857,GO:0005080,GO:0005488,GO:0005496,GO:0005501,GO:0005504,GO:0005515,GO:0005575,GO:0005622,GO:0005623,GO:0005634,GO:0005635,GO:0005640,GO:0005737,GO:0005783,GO:0005789,GO:0005886,GO:0005887,GO:0005975,GO:0005996,GO:0006011,GO:0006063,GO:0006082,GO:0006109,GO:0006139,GO:0006629,GO:0006631,GO:0006706,GO:…	2.4.1.17,2.4.1.47	ko:K00699,ko:K04628	K00699	UGT	glucuronosyltransferase [EC:2.4.1.17]	K04628	CGT	ceramide galactosyltransferase [EC:2.4.1.47]	0	0	ko00040,ko00053,ko00140,ko00565,ko00600,ko00830,ko00860,ko00980,ko00982,ko00983,ko01100,ko01110,ko05204,map00040,map00053,map00140,map00565,map00600,map00830,map00860,map00980,map00982,map00983,map01100,map01110,map05204	M00014,M00067,M00129	R01383,R01500,R02358,R02389,R02478,R02502,R02902,R03091,R04322,R04352,R04353,R04354,R04683,R06277,R07106,R08259,R08261,R08262,R08263,R08615,R09426,R09427,R09428,R10804
1	60	Over	TRINITY_DN2149_c3_g1_i2	3571	TRINITY_DN2149_c3_g1_i2.p1	993	complete	21.7	135.456	-4.44032	0.948002	-4.68388	2.81497e-06	0.000318347	37.8	1.4	17.9	2	Extracellular	Signal peptide							13249.RPRC015103-PA	1.53e-155	479	COG2304@1|root,2QPS2@2759|Eukaryota,38C6V@33154|Opisthokonta,3BE0X@33208|Metazoa,3CW49@33213|Bilateria,41XXA@6656|Arthropoda,3SMD0@50557|Insecta,3EC3H@33342|Paraneoptera	33208|Metazoa	S	Vault protein inter-alpha-trypsin domain	ITI_HC_C,VIT,VWA,VWA_3	ITIH5	-	-	-	0	0	0	0	0	0	0	0	-	-	-
1	61	Over	TRINITY_DN21974_c1_g1_i3	3424	TRINITY_DN21974_c1_g1_i3.p1	594	complete	2.5	57.5348	-1.3433	0.347394	-3.86679	0.000110277	0.00629893	12.6	3.5	3.7	0.6	Cell membrane	Signal peptide|Transmembrane domain							69319.XP_008553849.1	3.26e-287	800	KOG3097@1|root,KOG3097@2759|Eukaryota,39NH3@33154|Opisthokonta,3BCBB@33208|Metazoa,3CYBR@33213|Bilateria,41VW6@6656|Arthropoda,3SG3N@50557|Insecta,46F33@7399|Hymenoptera	33208|Metazoa	S	Ion channel regulatory protein UNC-93	MFS_1,UNC-93	unc-93	GO:0003674,GO:0005575,GO:0005622,GO:0005623,GO:0005737,GO:0005886,GO:0005887,GO:0006937,GO:0008150,GO:0010959,GO:0015459,GO:0016020,GO:0016021,GO:0016247,GO:0031224,GO:0031226,GO:0032879,GO:0043226,GO:0043228,GO:0043229,GO:0043232,GO:0043266,GO:0043269,GO:0043292,GO:0044057,GO:0044422,GO:0044424,GO:0044425,GO:0044444,GO:0044449,GO:0044459,GO:0044464,GO:0050789,GO:0051049,GO:0051239,GO:0055120,GO:…	-	-	0	0	0	0	0	0	0	0	-	-	-
1	62	Over	TRINITY_DN2234_c1_g1_i1	2494	TRINITY_DN2234_c1_g1_i1.p1	407	complete	5.7	265.008	-2.50313	0.456171	-5.48727	4.08182e-08	7.65512e-06	95.2	11.4	19.7	5.7	Cytoplasm	Peroxisomal targeting signal							136037.KDR16811	6.38e-237	657	COG3483@1|root,KOG3906@2759|Eukaryota,38BTM@33154|Opisthokonta,3BB71@33208|Metazoa,3CUF5@33213|Bilateria,41W0Q@6656|Arthropoda,3SH4N@50557|Insecta	33208|Metazoa	E	Heme-dependent dioxygenase that catalyzes the oxidative cleavage of the L-tryptophan (L-Trp) pyrrole ring and converts L- tryptophan to N-formyl-L-kynurenine. Catalyzes the oxidative cleavage of the indole moiety	Trp_dioxygenase	TDO2	GO:0003674,GO:0003824,GO:0004833,GO:0005488,GO:0005515,GO:0005575,GO:0005622,GO:0005623,GO:0005737,GO:0005829,GO:0006082,GO:0006084,GO:0006139,GO:0006163,GO:0006520,GO:0006568,GO:0006569,GO:0006576,GO:0006586,GO:0006637,GO:0006725,GO:0006726,GO:0006727,GO:0006732,GO:0006753,GO:0006790,GO:0006793,GO:0006796,GO:0006807,GO:0008055,GO:0008144,GO:0008150,GO:0008152,GO:0009056,GO:0009058,GO:0009063,GO:…	1.13.11.11	ko:K00453	K00453	TDO2	tryptophan 2,3-dioxygenase [EC:1.13.11.11]	0	0	0	0	0	ko00380,ko01100,map00380,map01100	M00038	R00678
1	63	Over	TRINITY_DN22982_c0_g1_i6	1026	TRINITY_DN22982_c0_g1_i6.p1	233	5prime_partial	4.5	22.3897	-2.16763	0.602331	-3.59873	0.000319776	0.013327	21.1	3.3	12	1.2	Extracellular	Signal peptide							136037.KDR21757	3.4e-52	176	2E93Y@1|root,2SFHR@2759|Eukaryota,3AAH2@33154|Opisthokonta,3BV1N@33208|Metazoa,3DBKW@33213|Bilateria,423JQ@6656|Arthropoda,3SRS0@50557|Insecta	33208|Metazoa	S	C-type lectin (CTL) or carbohydrate-recognition domain (CRD)	Lectin_C	-	-	-	-	0	0	0	0	0	0	0	0	-	-	-
1	64	Over	TRINITY_DN23_c0_g1_i5	3951	TRINITY_DN23_c0_g1_i5.p1	645	complete	2.6	148.026	-1.3852	0.406128	-3.41073	0.000647886	0.0229617	28.1	7.7	6.6	4	Cytoplasm|Nucleus	Nuclear localization signal							136037.KDR22175	0	1085	KOG0117@1|root,KOG0117@2759|Eukaryota,38B4M@33154|Opisthokonta,3BBMN@33208|Metazoa,3CR8H@33213|Bilateria,41W50@6656|Arthropoda,3SGN0@50557|Insecta	33208|Metazoa	A	nucleic acid binding	RRM_1	HNRNPR	GO:0000003,GO:0000375,GO:0000377,GO:0000398,GO:0002064,GO:0002065,GO:0002066,GO:0002376,GO:0003002,GO:0003006,GO:0003674,GO:0003676,GO:0003723,GO:0003727,GO:0003729,GO:0003730,GO:0005488,GO:0005575,GO:0005622,GO:0005623,GO:0005634,GO:0005654,GO:0005681,GO:0005737,GO:0006139,GO:0006396,GO:0006397,GO:0006417,GO:0006725,GO:0006807,GO:0006950,GO:0006952,GO:0006955,GO:0007275,GO:0007276,GO:0007281,GO:…	-	ko:K13160,ko:K13161	K13160	SYNCRIP	heterogeneous nuclear ribonucleoprotein Q	K13161	HNRNPR	heterogeneous nuclear ribonucleoprotein R	0	0	-	-	-
1	65	Over	TRINITY_DN2360_c0_g2_i5	3108	TRINITY_DN2360_c0_g2_i5.p1	577	complete	3.5	42.8794	-1.81027	0.462125	-3.91727	8.95583e-05	0.00549185	11.2	2.3	4.2	0.8	Cytoplasm	Nuclear localization signal							136037.KDR23290	2.18e-106	325	KOG2933@1|root,KOG2933@2759|Eukaryota,38G28@33154|Opisthokonta,3BQSF@33208|Metazoa,3D7QS@33213|Bilateria,41ZJG@6656|Arthropoda,3SMVJ@50557|Insecta	33208|Metazoa	S	non-motile cilium assembly	CLASP_N	-	-	-	-	0	0	0	0	0	0	0	0	-	-	-
1	66	Over	TRINITY_DN238_c0_g1_i18	4303	TRINITY_DN238_c0_g1_i18.p1	483	complete	2.2	34.2241	-1.15296	0.344815	-3.34371	0.000826648	0.0271984	5.7	1.8	1	0.6	Cytoplasm|Nucleus	Nuclear localization signal							136037.KDR08240	1.25e-260	733	KOG0667@1|root,KOG0671@2759|Eukaryota,38EZY@33154|Opisthokonta,3BB26@33208|Metazoa,3D2V6@33213|Bilateria,41VJD@6656|Arthropoda,3SH2Z@50557|Insecta	33208|Metazoa	T	It is involved in the biological process described with protein phosphorylation	Pkinase	CLK2	GO:0000003,GO:0001101,GO:0001654,GO:0001745,GO:0001751,GO:0001754,GO:0002682,GO:0002683,GO:0002790,GO:0003002,GO:0003006,GO:0003674,GO:0003824,GO:0004672,GO:0004674,GO:0004713,GO:0004715,GO:0005488,GO:0005515,GO:0005575,GO:0005622,GO:0005623,GO:0005634,GO:0005654,GO:0005737,GO:0005783,GO:0006109,GO:0006111,GO:0006464,GO:0006468,GO:0006793,GO:0006796,GO:0006807,GO:0006810,GO:0006996,GO:0007049,GO:…	2.7.12.1	ko:K08823	K08823	CLK2_3	dual specificity protein kinase CLK2/3 [EC:2.7.12.1]	0	0	0	0	0	-	-	-
1	67	Over	TRINITY_DN239_c0_g2_i4	3798	TRINITY_DN239_c0_g2_i4.p1	974	complete	2.6	1487.89	-1.38587	0.329281	-4.20878	2.5675e-05	0.00197882	293.4	76.7	79.2	9.5	Nucleus	Nuclear localization signal							7029.ACYPI085421-PA	3e-75	261	KOG1075@1|root,KOG1075@2759|Eukaryota,38HBH@33154|Opisthokonta,3BKM4@33208|Metazoa,3D66I@33213|Bilateria,4220K@6656|Arthropoda,3SMZ9@50557|Insecta,3EDS2@33342|Paraneoptera	33208|Metazoa	S	Ribonuclease H protein	Exo_endo_phos,Exo_endo_phos_2,RVT_1	-	-	-	-	0	0	0	0	0	0	0	0	-	-	-
1	68	Over	TRINITY_DN2412_c0_g1_i11	2079	TRINITY_DN2412_c0_g1_i11.p1	363	complete	71.8	7.34868	-6.16688	1.91501	-3.22028	0.00128063	0.0376436	3.7	0	3.1	0	Cytoplasm|Cell membrane	Nuclear localization signal							136037.KDR14367	6.92e-159	456	KOG3587@1|root,KOG3587@2759|Eukaryota,38F0D@33154|Opisthokonta,3BAQ8@33208|Metazoa,3D0B9@33213|Bilateria,4200X@6656|Arthropoda,3SMNN@50557|Insecta	33208|Metazoa	W	Galectin	Gal-bind_lectin	LGALS8	GO:0001667,GO:0001775,GO:0001944,GO:0001945,GO:0002252,GO:0002263,GO:0002285,GO:0002312,GO:0002313,GO:0002317,GO:0002335,GO:0002366,GO:0002376,GO:0002520,GO:0002521,GO:0002682,GO:0002684,GO:0002694,GO:0002696,GO:0003674,GO:0005102,GO:0005178,GO:0005488,GO:0005515,GO:0005575,GO:0005576,GO:0005615,GO:0005622,GO:0005623,GO:0005737,GO:0005829,GO:0006914,GO:0006928,GO:0006950,GO:0006952,GO:0006955,GO:…	-	ko:K06832,ko:K10091,ko:K10093,ko:K20300	K06832	LGALS8	galectin-8	K10091	LGALS4	galectin-4	K10093	K20300	-	-	-
1	69	Over	TRINITY_DN2419_c0_g1_i2	6025	TRINITY_DN2419_c0_g1_i2.p1	808	complete	3	119.623	-1.57763	0.317355	-4.97117	6.65509e-07	9.24524e-05	15.3	3.6	4.6	1.2	Cytoplasm|Nucleus	Nuclear localization signal|Nuclear export signal							136037.KDR18807	0	1176	KOG3732@1|root,KOG3732@2759|Eukaryota,38HNW@33154|Opisthokonta,3BFK2@33208|Metazoa,3CUDT@33213|Bilateria,41VYK@6656|Arthropoda,3SHKC@50557|Insecta	33208|Metazoa	KU	Staufen C-terminal domain	Staufen_C,dsrm	STAU1	GO:0000003,GO:0000578,GO:0000932,GO:0001654,GO:0001709,GO:0003002,GO:0003006,GO:0003008,GO:0003674,GO:0003676,GO:0003723,GO:0003725,GO:0003729,GO:0003730,GO:0005488,GO:0005515,GO:0005575,GO:0005622,GO:0005623,GO:0005634,GO:0005635,GO:0005730,GO:0005737,GO:0005783,GO:0005791,GO:0005829,GO:0005856,GO:0005875,GO:0005886,GO:0005938,GO:0006403,GO:0006417,GO:0006810,GO:0006886,GO:0006928,GO:0006950,GO:…	-	ko:K17597	K17597	STAU	double-stranded RNA-binding protein Staufen	0	0	0	0	0	-	-	-
1	70	Over	TRINITY_DN2429_c0_g1_i5	2204	TRINITY_DN2429_c0_g1_i5.p1	503	complete	5.2	127.891	-2.3655	0.438111	-5.39933	6.6892e-08	1.17668e-05	51.7	6.8	11.6	2.2	Cell membrane	Transmembrane domain							6669.EFX70363	1.87e-104	330	KOG2601@1|root,KOG2601@2759|Eukaryota,39AJX@33154|Opisthokonta,3BAWR@33208|Metazoa,3CRU7@33213|Bilateria,41ZH8@6656|Arthropoda	33208|Metazoa	P	Ferroportin1 (FPN1)	FPN1	SLC40A1	GO:0000041,GO:0001503,GO:0001776,GO:0002260,GO:0002262,GO:0002376,GO:0002520,GO:0003158,GO:0003674,GO:0005215,GO:0005216,GO:0005261,GO:0005381,GO:0005488,GO:0005515,GO:0005575,GO:0005622,GO:0005623,GO:0005634,GO:0005654,GO:0005737,GO:0005829,GO:0005886,GO:0005887,GO:0006355,GO:0006357,GO:0006807,GO:0006810,GO:0006811,GO:0006812,GO:0006826,GO:0006873,GO:0006875,GO:0006879,GO:0007275,GO:0008021,GO:…	-	ko:K14685	K14685	SLC40A1	solute carrier family 40 (iron-regulated transporter), member 1	0	0	0	0	0	ko04216,ko04978,map04216,map04978	-	-
1	71	Over	TRINITY_DN24535_c0_g1_i1	3631	TRINITY_DN24535_c0_g1_i1.p1	910	complete	6.2	21.002	-2.62329	0.49067	-5.34635	8.97478e-08	1.55367e-05	5.2	0.6	0.7	0.4	Golgi apparatus	Signal peptide|Transmembrane domain							13249.RPRC004553-PA	0	938	KOG3588@1|root,KOG3588@2759|Eukaryota,38D3Y@33154|Opisthokonta,3BBF5@33208|Metazoa,3CUGR@33213|Bilateria,41TV6@6656|Arthropoda,3SHFD@50557|Insecta,3E9JZ@33342|Paraneoptera	33208|Metazoa	G	Chondroitin N-acetylgalactosaminyltransferase	CHGN,Fringe	CHSY1	GO:0000003,GO:0000139,GO:0001501,GO:0002009,GO:0002062,GO:0002063,GO:0002119,GO:0002164,GO:0003002,GO:0003674,GO:0003824,GO:0005488,GO:0005515,GO:0005575,GO:0005576,GO:0005622,GO:0005623,GO:0005737,GO:0005794,GO:0006022,GO:0006023,GO:0006024,GO:0006029,GO:0006082,GO:0006790,GO:0006807,GO:0007275,GO:0007389,GO:0007610,GO:0008150,GO:0008152,GO:0008194,GO:0008375,GO:0008376,GO:0008589,GO:0009058,GO:…	2.4.1.175,2.4.1.226	ko:K13499	K13499	CHSY	chondroitin sulfate synthase [EC:2.4.1.175 2.4.1.226]	0	0	0	0	0	ko00532,ko01100,map00532,map01100	M00058	R04603,R05931,R05932,R05933,R05934,R07336
1	72	Over	TRINITY_DN25_c0_g1_i4	1334	TRINITY_DN25_c0_g1_i4.p1	361	complete	4.2	62.9495	-2.05684	0.595317	-3.45503	0.000550229	0.0201021	42.7	7.7	9.1	7.4	Cytoplasm	Nuclear localization signal|Nuclear export signal							136037.KDR21334	1.52e-170	486	COG1448@1|root,KOG1412@2759|Eukaryota,39W2P@33154|Opisthokonta,3BE99@33208|Metazoa,3CZIY@33213|Bilateria,41V8T@6656|Arthropoda,3SJV5@50557|Insecta	33208|Metazoa	E	It is involved in the biological process described with cellular amino acid metabolic process	Aminotran_1_2	GOT1	GO:0000323,GO:0003254,GO:0003674,GO:0003824,GO:0004069,GO:0004609,GO:0005488,GO:0005575,GO:0005622,GO:0005623,GO:0005634,GO:0005654,GO:0005737,GO:0005739,GO:0005759,GO:0005764,GO:0005773,GO:0005777,GO:0005829,GO:0005975,GO:0005996,GO:0006006,GO:0006066,GO:0006071,GO:0006082,GO:0006094,GO:0006103,GO:0006106,GO:0006107,GO:0006114,GO:0006520,GO:0006531,GO:0006532,GO:0006533,GO:0006536,GO:0006537,GO:…	2.6.1.1	ko:K14454	K14454	GOT1	aspartate aminotransferase, cytoplasmic [EC:2.6.1.1]	0	0	0	0	0	ko00220,ko00250,ko00270,ko00330,ko00350,ko00360,ko00400,ko00710,ko00950,ko00960,ko01100,ko01110,ko01120,ko01130,ko01200,ko01210,ko01230,map00220,map00250,map00270,map00330,map00350,map00360,map00400,map00710,map00950,map00960,map01100,map01110,map01120,map01130,map01200,map01210,map01230	M00170,M00171	R00355,R00694,R00734,R00896,R02433,R02619,R05052
1	73	Over	TRINITY_DN2565_c0_g1_i6	5742	TRINITY_DN2565_c0_g1_i6.p1	1286	complete	4.7	39.703	-2.23306	0.495048	-4.51079	6.45857e-06	0.000637501	5.7	0.9	2.1	0.1	Cytoplasm	Nuclear localization signal							136037.KDR07853	0	1732	KOG3508@1|root,KOG3508@2759|Eukaryota,38FII@33154|Opisthokonta,3BCG8@33208|Metazoa,3CSYX@33213|Bilateria,41XVT@6656|Arthropoda,3SGU6@50557|Insecta	33208|Metazoa	T	It is involved in the biological process described with regulation of Ras GTPase activity	C2,DUF3498,RasGAP	DAB2IP	GO:0000122,GO:0000165,GO:0000185,GO:0000187,GO:0000902,GO:0001558,GO:0001932,GO:0001933,GO:0001934,GO:0002237,GO:0002682,GO:0002683,GO:0003008,GO:0003674,GO:0005096,GO:0005102,GO:0005123,GO:0005126,GO:0005172,GO:0005488,GO:0005515,GO:0005543,GO:0005575,GO:0005622,GO:0005623,GO:0005737,GO:0005829,GO:0005886,GO:0006355,GO:0006357,GO:0006464,GO:0006468,GO:0006469,GO:0006793,GO:0006796,GO:0006807,GO:…	-	ko:K17631,ko:K17633,ko:K19901	K17631	SYNGAP	Ras/Rap GTPase-activating protein SynGAP	K17633	RASAL2	RAS protein activator-like 2	K19901	0	ko04014,ko04210,ko04668,map04014,map04210,map04668	-	-
1	74	Over	TRINITY_DN259_c0_g1_i30	1391	TRINITY_DN259_c0_g1_i30.p1	135	complete	4.5	8.78309	-2.16018	0.683249	-3.16163	0.00156889	0.0438062	5.7	0.8	1.8	0.6	Cytoplasm|Nucleus	Nuclear localization signal							136037.KDR22890	5.98e-34	120	2CXPK@1|root,2RYWI@2759|Eukaryota,3A0FF@33154|Opisthokonta,3BPTP@33208|Metazoa,3D6SN@33213|Bilateria,420YM@6656|Arthropoda	33208|Metazoa	0	-	DDE_3,HTH_Tnp_Tc3_2,Transposase_1	-	-	2.1.1.43	ko:K11433	K11433	SETMAR	[histone H3]-lysine36 N-dimethyltransferase SETMAR [EC:2.1.1.357]	0	0	0	0	0	ko00310,map00310	-	R03875,R03938,R04866,R04867
1	75	Over	TRINITY_DN2641_c0_g1_i1	1557	TRINITY_DN2641_c0_g1_i1.p1	168	complete	4	49.5303	-1.99636	0.535875	-3.72542	0.00019499	0.00943708	28.4	5.2	8	4.9	Cytoplasm								136037.KDR07860	2.23e-83	258	COG0137@1|root,KOG1706@2759|Eukaryota,38BMZ@33154|Opisthokonta,3BAUF@33208|Metazoa,3CSN2@33213|Bilateria,41V2S@6656|Arthropoda,3SG8V@50557|Insecta	33208|Metazoa	E	argininosuccinate synthase activity. It is involved in the biological process described with arginine biosynthetic process	Arginosuc_synth	ASS1	GO:0000050,GO:0000052,GO:0000053,GO:0000323,GO:0001101,GO:0001505,GO:0001655,GO:0001822,GO:0001889,GO:0002237,GO:0002376,GO:0002526,GO:0003674,GO:0003824,GO:0004055,GO:0005488,GO:0005515,GO:0005575,GO:0005622,GO:0005623,GO:0005634,GO:0005737,GO:0005739,GO:0005740,GO:0005741,GO:0005764,GO:0005773,GO:0005783,GO:0005829,GO:0006082,GO:0006520,GO:0006525,GO:0006526,GO:0006531,GO:0006575,GO:0006807,GO:…	6.3.4.5	ko:K01940	K01940	argG	argininosuccinate synthase [EC:6.3.4.5]	0	0	0	0	0	ko00220,ko00250,ko01100,ko01110,ko01130,ko01230,ko05418,map00220,map00250,map01100,map01110,map01130,map01230,map05418	M00029,M00844,M00845	R01954
1	76	Over	TRINITY_DN2641_c0_g1_i3	1627	TRINITY_DN2641_c0_g1_i3.p1	414	complete	2.2	1674.69	-1.15034	0.288648	-3.98526	6.7406e-05	0.00437167	782.4	244.7	190.7	55.4	Cytoplasm	Peroxisomal targeting signal							136037.KDR07860	3.68e-266	733	COG0137@1|root,KOG1706@2759|Eukaryota,38BMZ@33154|Opisthokonta,3BAUF@33208|Metazoa,3CSN2@33213|Bilateria,41V2S@6656|Arthropoda,3SG8V@50557|Insecta	33208|Metazoa	E	argininosuccinate synthase activity. It is involved in the biological process described with arginine biosynthetic process	Arginosuc_synth	ASS1	GO:0000050,GO:0000052,GO:0000053,GO:0000323,GO:0001101,GO:0001505,GO:0001655,GO:0001822,GO:0001889,GO:0002237,GO:0002376,GO:0002526,GO:0003674,GO:0003824,GO:0004055,GO:0005488,GO:0005515,GO:0005575,GO:0005622,GO:0005623,GO:0005634,GO:0005737,GO:0005739,GO:0005740,GO:0005741,GO:0005764,GO:0005773,GO:0005783,GO:0005829,GO:0006082,GO:0006520,GO:0006525,GO:0006526,GO:0006531,GO:0006575,GO:0006807,GO:…	6.3.4.5	ko:K01940	K01940	argG	argininosuccinate synthase [EC:6.3.4.5]	0	0	0	0	0	ko00220,ko00250,ko01100,ko01110,ko01130,ko01230,ko05418,map00220,map00250,map01100,map01110,map01130,map01230,map05418	M00029,M00844,M00845	R01954
1	77	Over	TRINITY_DN2705_c0_g1_i8	2282	TRINITY_DN2705_c0_g1_i8.p1	141	complete	16	20.8984	-4.00216	1.14578	-3.49297	0.000477687	0.0182035	9.3	0.5	2.9	0.9	Cytoplasm	Nuclear localization signal|Nuclear export signal							103372.F4WT40	1.25e-91	273	KOG0033@1|root,KOG0033@2759|Eukaryota,38FV7@33154|Opisthokonta,3BF3D@33208|Metazoa,3CSTU@33213|Bilateria,41TNN@6656|Arthropoda,3SHUS@50557|Insecta,46E0M@7399|Hymenoptera	33208|Metazoa	T	binding. It is involved in the biological process described with protein phosphorylation	CaMKII_AD,Pkinase	CAMK2G	GO:0000003,GO:0000082,GO:0000165,GO:0000278,GO:0000902,GO:0000904,GO:0001505,GO:0001558,GO:0001666,GO:0001775,GO:0001932,GO:0001934,GO:0002026,GO:0002027,GO:0002028,GO:0002029,GO:0002030,GO:0002376,GO:0002790,GO:0002931,GO:0003008,GO:0003012,GO:0003013,GO:0003015,GO:0003254,GO:0003298,GO:0003300,GO:0003301,GO:0003674,GO:0003824,GO:0004672,GO:0004674,GO:0004683,GO:0004721,GO:0004722,GO:0004723,GO:…	2.7.11.17	ko:K04515	K04515	CAMK2	calcium/calmodulin-dependent protein kinase (CaM kinase) II [EC:2.7.11.17]	0	0	0	0	0	ko04012,ko04020,ko04024,ko04066,ko04114,ko04217,ko04261,ko04310,ko04360,ko04713,ko04720,ko04722,ko04725,ko04728,ko04740,ko04745,ko04750,ko04911,ko04912,ko04916,ko04921,ko04922,ko04925,ko04934,ko04971,ko05031,ko05152,ko05200,ko05205,ko05214,map04012,map04020,map04024,map04066,map04114,map04217,map04261,map04310,map04360,map04713,map04720,map04722,map04725,map04728,map04740,map04745,map04750,map049…	-	-
1	78	Over	TRINITY_DN2781_c0_g1_i3	3956	TRINITY_DN2781_c0_g1_i3.p1	1080	5prime_partial	3	50.5937	-1.60345	0.422144	-3.79834	0.000145666	0.00762378	10	2.4	3	1.1	Nucleus	Nuclear localization signal							136037.KDR20794	2.53e-153	484	COG4229@1|root,KOG2630@2759|Eukaryota,398HV@33154|Opisthokonta,3BEY0@33208|Metazoa,3CV76@33213|Bilateria,41XV4@6656|Arthropoda,3SJNB@50557|Insecta	33208|Metazoa	E	Bifunctional enzyme that catalyzes the enolization of 2,3-diketo-5-methylthiopentyl-1-phosphate (DK-MTP-1-P) into the intermediate 2-hydroxy-3-keto-5-methylthiopentenyl-1-phosphate (HK-MTPenyl-1-P), which is then dephosphorylated to form the acireductone 1,2-dihydroxy-3-keto-5-methylthiopentene (DHK- MTPene)	Hydrolase	ENOPH1	GO:0000096,GO:0000097,GO:0003674,GO:0003824,GO:0005575,GO:0005622,GO:0005623,GO:0005737,GO:0005829,GO:0006082,GO:0006520,GO:0006555,GO:0006790,GO:0006793,GO:0006796,GO:0006807,GO:0008150,GO:0008152,GO:0008652,GO:0009058,GO:0009066,GO:0009067,GO:0009086,GO:0009987,GO:0016053,GO:0016311,GO:0016787,GO:0016788,GO:0016791,GO:0017144,GO:0019509,GO:0019752,GO:0042578,GO:0043094,GO:0043102,GO:0043436,GO:…	3.1.3.77	ko:K09880	K09880	mtnC	enolase-phosphatase E1 [EC:3.1.3.77]	0	0	0	0	0	ko00270,ko01100,map00270,map01100	M00034	R07395
1	79	Over	TRINITY_DN29656_c0_g1_i10	2275	TRINITY_DN29656_c0_g1_i10.p1	220	complete	18.4	11.891	-4.19803	1.21353	-3.45937	0.00054145	0.0199107	5.3	0.2	3.6	0.4	Cell membrane|Lysosome/Vacuole|Golgi apparatus	Transmembrane domain							136037.KDR15509	1.6e-137	392	COG0484@1|root,KOG0716@2759|Eukaryota,38GDY@33154|Opisthokonta,3BHBK@33208|Metazoa,3CTGR@33213|Bilateria,41W99@6656|Arthropoda,3SIS4@50557|Insecta	33208|Metazoa	O	DnaJ molecular chaperone homology domain	DnaJ	DNAJC5B	GO:0000323,GO:0001505,GO:0001775,GO:0002252,GO:0002263,GO:0002274,GO:0002275,GO:0002283,GO:0002366,GO:0002376,GO:0002443,GO:0002444,GO:0002446,GO:0003674,GO:0005488,GO:0005515,GO:0005575,GO:0005622,GO:0005623,GO:0005737,GO:0005764,GO:0005765,GO:0005766,GO:0005773,GO:0005774,GO:0005886,GO:0006457,GO:0006810,GO:0006836,GO:0006887,GO:0006955,GO:0007154,GO:0007267,GO:0007268,GO:0007269,GO:0007275,GO:…	-	ko:K09525	K09525	DNAJC5	DnaJ homolog subfamily C member 5	0	0	0	0	0	ko04141,map04141	-	-
1	80	Over	TRINITY_DN3121_c0_g1_i1	2169	TRINITY_DN3121_c0_g1_i1.p1	169	complete	2.4	41.4606	-1.28145	0.389122	-3.29318	0.000990625	0.0311805	14.5	4.3	2.1	2	Cytoplasm|Nucleus	Nuclear export signal							7070.TC012513-PA	4.77e-34	134	KOG1075@1|root,KOG1721@1|root,KOG1075@2759|Eukaryota,KOG1721@2759|Eukaryota,3AB3G@33154|Opisthokonta,3BQKC@33208|Metazoa,3D77Y@33213|Bilateria,42261@6656|Arthropoda,3SQT9@50557|Insecta	33208|Metazoa	S	Reverse transcriptase (RNA-dependent DNA polymerase)	RVT_1	-	-	-	-	0	0	0	0	0	0	0	0	-	-	-
1	81	Over	TRINITY_DN313_c0_g1_i27	2110	TRINITY_DN313_c0_g1_i27.p1	431	complete	34.9	64.0712	-5.12368	1.32996	-3.85251	0.000116915	0.00654792	31.5	0.8	18.3	1.5	Cytoplasm	Peroxisomal targeting signal							136037.KDR24318	2.68e-152	445	28Z5F@1|root,2R5ZP@2759|Eukaryota,39YND@33154|Opisthokonta,3BQ6M@33208|Metazoa,3D71G@33213|Bilateria,41YBJ@6656|Arthropoda,3SH2Q@50557|Insecta	33208|Metazoa	S	Perilipin family	Perilipin	-	-	-	ko:K17284	K17284	PLIN2	perilipin-2	0	0	0	0	0	ko03320,map03320	-	-
1	82	Over	TRINITY_DN3231_c0_g1_i1	3247	TRINITY_DN3231_c0_g1_i1.p1	119	complete	13.8	364.232	-3.789	0.773651	-4.89755	9.70387e-07	0.000129222	107.3	6.1	62.8	5.3	Extracellular	Signal peptide							136037.KDR15950	1.8e-41	140	2E6ZQ@1|root,2SDMW@2759|Eukaryota,3ACD6@33154|Opisthokonta,3BWDH@33208|Metazoa,3DCWU@33213|Bilateria,421RM@6656|Arthropoda,3SPZS@50557|Insecta	33208|Metazoa	0	-	Prokineticin	-	-	-	-	0	0	0	0	0	0	0	0	-	-	-
1	83	Over	TRINITY_DN3231_c0_g1_i3	1976	TRINITY_DN3231_c0_g1_i3.p1	119	complete	4.9	55.7721	-2.28237	0.560205	-4.07416	4.61799e-05	0.00325793	25.9	3.6	16.6	0.5	Extracellular	Signal peptide							136037.KDR15950	1.8e-41	140	2E6ZQ@1|root,2SDMW@2759|Eukaryota,3ACD6@33154|Opisthokonta,3BWDH@33208|Metazoa,3DCWU@33213|Bilateria,421RM@6656|Arthropoda,3SPZS@50557|Insecta	33208|Metazoa	0	-	Prokineticin	-	-	-	-	0	0	0	0	0	0	0	0	-	-	-
1	84	Over	TRINITY_DN32732_c0_g1_i1	856	TRINITY_DN32732_c0_g1_i1.p1	231	complete	6.2	36.795	-2.6236	0.498978	-5.25795	1.45672e-07	2.41055e-05	45.5	5.2	18.9	2.1	Extracellular	Signal peptide							136037.KDR21757	1.82e-59	194	2E93Y@1|root,2SFHR@2759|Eukaryota,3AAH2@33154|Opisthokonta,3BV1N@33208|Metazoa,3DBKW@33213|Bilateria,423JQ@6656|Arthropoda,3SRS0@50557|Insecta	33208|Metazoa	S	C-type lectin (CTL) or carbohydrate-recognition domain (CRD)	Lectin_C	-	-	-	-	0	0	0	0	0	0	0	0	-	-	-
1	85	Over	TRINITY_DN32914_c0_g1_i1	1002	TRINITY_DN32914_c0_g1_i1.p1	333	internal	95.5	16.1534	-6.57715	1.10808	-5.93562	2.92731e-09	7.5723e-07	18.9	0.1	3.9	0.2	Cytoplasm	Nuclear export signal							7460.GB46377-PA	5.2e-133	401	KOG4441@1|root,KOG4441@2759|Eukaryota,38I4J@33154|Opisthokonta,3BHTZ@33208|Metazoa,3CWQH@33213|Bilateria,41VJ6@6656|Arthropoda,3SGI4@50557|Insecta,46KZ8@7399|Hymenoptera	33208|Metazoa	T	BTB And C-terminal Kelch	BACK,BTB,Kelch_1	-	-	-	ko:K10448	K10448	KLHL10	kelch-like protein 10	0	0	0	0	0	-	-	-
1	86	Over	TRINITY_DN3369_c1_g1_i1	2498	TRINITY_DN3369_c1_g1_i1.p1	511	complete	4.8	654.346	-2.24949	0.546389	-4.11701	3.83826e-05	0.00276859	225.1	35	138.3	16.3	Endoplasmic reticulum	Signal peptide|Transmembrane domain							136037.KDR11277	2.64e-235	662	COG2124@1|root,KOG0157@2759|Eukaryota,38CHP@33154|Opisthokonta,3B9GY@33208|Metazoa,3CSG8@33213|Bilateria,41U3I@6656|Arthropoda,3SGAE@50557|Insecta	33208|Metazoa	Q	cytochrome p450	p450	-	-	-	ko:K07427,ko:K15001	K07427	CYP4V	docosahexaenoic acid omega-hydroxylase [EC:1.14.14.79]	K15001	CYP4	cytochrome P450 family 4 [EC:1.14.-.-]	0	0	-	-	-
1	87	Over	TRINITY_DN3415_c0_g1_i1	2685	TRINITY_DN3415_c0_g1_i1.p1	516	complete	13.1	195.124	-3.71181	0.818858	-4.5329	5.81781e-06	0.000587129	71.3	3.5	7.2	3.7	Endoplasmic reticulum	Signal peptide|Transmembrane domain							136037.KDR20346	2.33e-205	586	KOG1192@1|root,KOG1192@2759|Eukaryota,38B62@33154|Opisthokonta,3BDT1@33208|Metazoa,3CY8Z@33213|Bilateria,41XIT@6656|Arthropoda,3SZAE@50557|Insecta	33208|Metazoa	G	UDP-glucoronosyl and UDP-glucosyl transferase	UDPGT	UGT2A1	GO:0001523,GO:0001889,GO:0001972,GO:0002237,GO:0002526,GO:0003008,GO:0003674,GO:0003824,GO:0004857,GO:0005080,GO:0005488,GO:0005496,GO:0005501,GO:0005504,GO:0005515,GO:0005575,GO:0005622,GO:0005623,GO:0005634,GO:0005635,GO:0005640,GO:0005737,GO:0005783,GO:0005789,GO:0005886,GO:0005887,GO:0005975,GO:0005996,GO:0006063,GO:0006082,GO:0006109,GO:0006629,GO:0006631,GO:0006706,GO:0006711,GO:0006720,GO:…	2.4.1.17,2.4.1.47	ko:K00699,ko:K04628	K00699	UGT	glucuronosyltransferase [EC:2.4.1.17]	K04628	CGT	ceramide galactosyltransferase [EC:2.4.1.47]	0	0	ko00040,ko00053,ko00140,ko00565,ko00600,ko00830,ko00860,ko00980,ko00982,ko00983,ko01100,ko01110,ko05204,map00040,map00053,map00140,map00565,map00600,map00830,map00860,map00980,map00982,map00983,map01100,map01110,map05204	M00014,M00067,M00129	R01383,R01500,R02358,R02389,R02478,R02502,R02902,R03091,R04322,R04352,R04353,R04354,R04683,R06277,R07106,R08259,R08261,R08262,R08263,R08615,R09426,R09427,R09428,R10804
1	88	Over	TRINITY_DN3703_c1_g1_i1	2362	TRINITY_DN3703_c1_g1_i1.p1	564	complete	2.6	50.7846	-1.36076	0.415293	-3.27662	0.00105058	0.0325218	16.4	4.5	5.7	1.3	Extracellular	Signal peptide							136037.KDR24380	3.97e-233	661	COG2272@1|root,KOG1516@2759|Eukaryota,39Y33@33154|Opisthokonta,3BNNT@33208|Metazoa,3D46R@33213|Bilateria,429U3@6656|Arthropoda,3SZ8Y@50557|Insecta	2759|Eukaryota	G	Belongs to the type-B carboxylesterase lipase family	COesterase	-	-	2.7.7.7	ko:K02332	K02332	POLG	DNA polymerase gamma 1 [EC:2.7.7.7]	0	0	0	0	0	ko01100,ko04139,map01100,map04139	M00294	-
1	89	Over	TRINITY_DN37342_c0_g1_i1	1618	TRINITY_DN37342_c0_g1_i1.p1	304	complete	69.4	19.7231	-6.11587	1.20724	-5.06601	4.06245e-07	6.05466e-05	13.3	0.1	8.9	0.2	Cytoplasm	Nuclear localization signal							136037.KDR07295	1.01e-13	74.3	KOG3002@1|root,KOG3002@2759|Eukaryota,3APMS@33154|Opisthokonta,3C2HS@33208|Metazoa,3DHZK@33213|Bilateria,4235P@6656|Arthropoda	33208|Metazoa	O	E3 ubiquitin-protein ligase that mediates ubiquitination and subsequent proteasomal degradation of target proteins. E3 ubiquitin ligases accept ubiquitin from an E2 ubiquitin- conjugating enzyme in the form of a thioester and then directly transfers the ubiquitin to targeted substrates	Sina	-	-	2.3.2.27	ko:K04506	K04506	SIAH1	E3 ubiquitin-protein ligase SIAH1 [EC:2.3.2.27]	0	0	0	0	0	ko04013,ko04115,ko04120,ko04310,map04013,map04115,map04120,map04310	-	-
1	90	Over	TRINITY_DN37368_c0_g1_i1	3054	TRINITY_DN37368_c0_g1_i1.p1	480	complete	15.1	511.998	-3.91357	0.970875	-4.03097	5.55478e-05	0.00375406	166.3	9.3	105.3	14.3	Cytoplasm	Nuclear export signal							136037.KDR23678	0	911	COG0076@1|root,KOG0628@2759|Eukaryota,38EZZ@33154|Opisthokonta,3B9Z3@33208|Metazoa,3CSPZ@33213|Bilateria,41XBM@6656|Arthropoda,3SFQK@50557|Insecta	33208|Metazoa	E	carboxy-lyase activity. It is involved in the biological process described with cellular amino acid metabolic process	Pyridoxal_deC	DDC	GO:0000003,GO:0001505,GO:0003008,GO:0003674,GO:0003824,GO:0004058,GO:0005488,GO:0005515,GO:0005575,GO:0005622,GO:0005623,GO:0005737,GO:0005829,GO:0006082,GO:0006520,GO:0006568,GO:0006570,GO:0006576,GO:0006584,GO:0006585,GO:0006586,GO:0006587,GO:0006725,GO:0006807,GO:0006810,GO:0006836,GO:0006950,GO:0007275,GO:0007444,GO:0007562,GO:0007564,GO:0007568,GO:0007591,GO:0007593,GO:0007610,GO:0007611,GO:…	4.1.1.105,4.1.1.22,4.1.1.25,4.1.1.28	ko:K01590,ko:K01593,ko:K22329	K01590	hdc	histidine decarboxylase [EC:4.1.1.22]	K01593	DDC	aromatic-L-amino-acid/L-tryptophan decarboxylase [EC:4.1.1.28 4.1.1.105]	K22329	0	ko00340,ko00350,ko00360,ko00380,ko00901,ko00950,ko00965,ko01100,ko01110,ko04726,ko04728,ko05030,ko05031,ko05034,map00340,map00350,map00360,map00380,map00901,map00950,map00965,map01100,map01110,map04726,map04728,map05030,map05031,map05034	M00037,M00042	R00685,R00699,R00736,R01167,R02080,R02701,R04909
1	91	Over	TRINITY_DN3795_c0_g1_i3	2337	TRINITY_DN3795_c0_g1_i3.p1	329	complete	96.9	9.89217	-6.59888	1.8282	-3.6095	0.00030679	0.0130024	4.6	0	3.1	0	Cytoplasm								7425.NV12585-PA	1.54e-105	320	KOG2947@1|root,KOG2947@2759|Eukaryota,38FDS@33154|Opisthokonta,3BB14@33208|Metazoa,3CUW6@33213|Bilateria,41ZEY@6656|Arthropoda,3SMM3@50557|Insecta,46HY1@7399|Hymenoptera	33208|Metazoa	G	pfkB family carbohydrate kinase	PfkB	KHK	GO:0003674,GO:0003824,GO:0004396,GO:0004454,GO:0005575,GO:0005622,GO:0005623,GO:0005634,GO:0005737,GO:0005829,GO:0005975,GO:0005996,GO:0006000,GO:0006001,GO:0006081,GO:0006082,GO:0006090,GO:0006091,GO:0006096,GO:0006109,GO:0006139,GO:0006163,GO:0006164,GO:0006165,GO:0006725,GO:0006732,GO:0006733,GO:0006753,GO:0006754,GO:0006757,GO:0006793,GO:0006796,GO:0006807,GO:0008150,GO:0008152,GO:0008865,GO:…	2.7.1.3	ko:K00846	K00846	KHK	ketohexokinase [EC:2.7.1.3]	0	0	0	0	0	ko00051,ko01100,ko01120,map00051,map01100,map01120	-	R00866,R03819
1	92	Over	TRINITY_DN38063_c0_g1_i1	1967	TRINITY_DN38063_c0_g1_i1.p1	513	complete	2.9	464.228	-1.52849	0.330881	-4.61944	3.84775e-06	0.000414323	190	47.4	34	22.9	Cytoplasm|Nucleus	Nuclear localization signal							136037.KDR19897	0	884	KOG0607@1|root,KOG0607@2759|Eukaryota,38BRN@33154|Opisthokonta,3BFTK@33208|Metazoa,3D1KZ@33213|Bilateria,41Y17@6656|Arthropoda,3SKN6@50557|Insecta	33208|Metazoa	T	It is involved in the biological process described with protein phosphorylation	Pkinase	MKNK1	GO:0000166,GO:0001932,GO:0001934,GO:0002376,GO:0002520,GO:0003674,GO:0003824,GO:0004672,GO:0004674,GO:0004683,GO:0005488,GO:0005515,GO:0005516,GO:0005524,GO:0005575,GO:0005622,GO:0005623,GO:0005634,GO:0005635,GO:0005654,GO:0005737,GO:0005813,GO:0005815,GO:0005829,GO:0005856,GO:0005874,GO:0006417,GO:0006446,GO:0006464,GO:0006468,GO:0006793,GO:0006796,GO:0006807,GO:0006915,GO:0006950,GO:0006970,GO:…	2.7.11.1	ko:K04372	K04372	MKNK	MAP kinase interacting serine/threonine kinase [EC:2.7.11.1]	0	0	0	0	0	ko04010,ko04066,ko04910,map04010,map04066,map04910	-	-
1	93	Over	TRINITY_DN382_c0_g1_i2	5256	TRINITY_DN382_c0_g1_i2.p1	451	complete	21.6	10.1104	-4.4349	1.11556	-3.97548	7.02372e-05	0.0045107	1.9	0.1	0.9	0.1	Cytoplasm	Nuclear export signal							34740.HMEL017042-PA	7.03e-61	211	KOG2945@1|root,KOG2945@2759|Eukaryota,38FFW@33154|Opisthokonta,3BEJZ@33208|Metazoa,3CXCU@33213|Bilateria,41ZK4@6656|Arthropoda,3SMS2@50557|Insecta,443X2@7088|Lepidoptera	33208|Metazoa	S	Hyaluronan / mRNA binding family	HABP4_PAI-RBP1,IHABP4_N	SERBP1	GO:0003674,GO:0003676,GO:0003723,GO:0003729,GO:0003730,GO:0005488,GO:0005515,GO:0005575,GO:0005622,GO:0005623,GO:0005634,GO:0005694,GO:0005700,GO:0005701,GO:0005703,GO:0005737,GO:0005829,GO:0005886,GO:0006325,GO:0006355,GO:0006464,GO:0006479,GO:0006807,GO:0006996,GO:0008150,GO:0008152,GO:0008213,GO:0009889,GO:0009892,GO:0009894,GO:0009987,GO:0010369,GO:0010468,GO:0010556,GO:0010605,GO:0010608,GO:…	-	ko:K13199	K13199	SERBP1	plasminogen activator inhibitor 1 RNA-binding protein	0	0	0	0	0	-	-	-
1	94	Over	TRINITY_DN382_c0_g1_i3	5241	TRINITY_DN382_c0_g1_i3.p1	446	complete	21.3	30.5818	-4.41317	1.29453	-3.40909	0.000651791	0.0230153	5.6	0.2	3	0.4	Cytoplasm	Nuclear export signal							7070.TC001877-PA	1.5e-36	144	KOG2945@1|root,KOG2945@2759|Eukaryota,38FFW@33154|Opisthokonta,3BEJZ@33208|Metazoa,3CXCU@33213|Bilateria,41ZK4@6656|Arthropoda,3SMS2@50557|Insecta	33208|Metazoa	S	heterochromatin organization	HABP4_PAI-RBP1,IHABP4_N	SERBP1	GO:0003674,GO:0003676,GO:0003723,GO:0003729,GO:0003730,GO:0005488,GO:0005515,GO:0005575,GO:0005622,GO:0005623,GO:0005634,GO:0005694,GO:0005700,GO:0005701,GO:0005703,GO:0005737,GO:0005829,GO:0005886,GO:0006325,GO:0006355,GO:0006464,GO:0006479,GO:0006807,GO:0006996,GO:0008150,GO:0008152,GO:0008213,GO:0009889,GO:0009892,GO:0009894,GO:0009987,GO:0010369,GO:0010468,GO:0010556,GO:0010605,GO:0010608,GO:…	-	ko:K13199	K13199	SERBP1	plasminogen activator inhibitor 1 RNA-binding protein	0	0	0	0	0	-	-	-
1	95	Over	TRINITY_DN3836_c0_g2_i18	3598	TRINITY_DN3836_c0_g2_i18.p1	438	complete	2.1	137.462	-1.06497	0.29324	-3.63173	0.000281532	0.0123486	26.7	9.2	5.1	3.4	Cytoplasm	Nuclear localization signal							136037.KDR23720	2.72e-283	778	28P3B@1|root,2QVPV@2759|Eukaryota,39W1J@33154|Opisthokonta,3BFE2@33208|Metazoa,3D1A7@33213|Bilateria,41V69@6656|Arthropoda,3SIBE@50557|Insecta	33208|Metazoa	S	Farnesoic acid 0-methyl transferase	DUF3421,Methyltransf_FA	-	GO:0005575,GO:0005622,GO:0005623,GO:0005737,GO:0044424,GO:0044464	-	-	0	0	0	0	0	0	0	0	-	-	-
1	96	Over	TRINITY_DN392_c0_g1_i17	3979	TRINITY_DN392_c0_g1_i17.p1	531	complete	4.4	487.685	-2.14203	0.495726	-4.32099	1.55331e-05	0.00128048	103.5	17.2	29.4	10.8	Cytoplasm	Signal peptide							136037.KDR19978	5.98e-167	492	COG2303@1|root,KOG1238@2759|Eukaryota,38UEK@33154|Opisthokonta,3BXM2@33208|Metazoa,3DD9T@33213|Bilateria,42256@6656|Arthropoda,3SJ1U@50557|Insecta	33208|Metazoa	E	GMC oxidoreductase	GMC_oxred_C,GMC_oxred_N	-	-	1.1.3.49	ko:K21270	K21270	ChuaMOX	(R)-mandelonitrile oxidase [EC:1.1.3.49]	0	0	0	0	0	-	-	-
1	97	Over	TRINITY_DN392_c0_g1_i37	1214	TRINITY_DN392_c0_g1_i37.p1	222	5prime_partial	17.8	62.8395	-4.15309	0.650693	-6.38257	1.74145e-10	5.44324e-08	55.4	2.2	17.2	1.6	Extracellular								136037.KDR08567	1.85e-56	195	COG2303@1|root,KOG1238@2759|Eukaryota,3AHCP@33154|Opisthokonta,3CNGX@33208|Metazoa,3E4MK@33213|Bilateria,42AEM@6656|Arthropoda,3SZVS@50557|Insecta	33208|Metazoa	E	GMC oxidoreductase	GMC_oxred_C,GMC_oxred_N	-	-	1.1.3.49	ko:K21270	K21270	ChuaMOX	(R)-mandelonitrile oxidase [EC:1.1.3.49]	0	0	0	0	0	-	-	-
1	98	Over	TRINITY_DN3939_c0_g1_i5	3131	TRINITY_DN3939_c0_g1_i5.p1	899	complete	3.8	26.5432	-1.94024	0.426976	-4.54415	5.51563e-06	0.000565623	6.9	1.3	1.5	0.2	Cytoplasm	Nuclear localization signal							7070.TC007089-PA	1.24e-208	624	KOG0515@1|root,KOG0515@2759|Eukaryota,38HT9@33154|Opisthokonta,3BCSY@33208|Metazoa,3CW0I@33213|Bilateria,41VX8@6656|Arthropoda,3SHW7@50557|Insecta	33208|Metazoa	T	Src homology 3 domains	Ank_2,Ank_4,SH3_1	PPP1R13B	GO:0001932,GO:0001934,GO:0002039,GO:0003674,GO:0005070,GO:0005488,GO:0005515,GO:0005575,GO:0005622,GO:0005623,GO:0005634,GO:0005654,GO:0005737,GO:0005829,GO:0005886,GO:0005912,GO:0006810,GO:0006839,GO:0006915,GO:0006996,GO:0007005,GO:0007006,GO:0007154,GO:0007165,GO:0007275,GO:0007399,GO:0007417,GO:0007507,GO:0008047,GO:0008134,GO:0008150,GO:0008219,GO:0009314,GO:0009628,GO:0009790,GO:0009792,GO:…	-	ko:K02177,ko:K16823,ko:K17554	K02177	BRU	bruno	K16823	TP53BP2	apoptosis-stimulating of p53 protein 2	K17554	0	ko04320,ko04390,map04320,map04390	-	-
1	99	Over	TRINITY_DN396_c0_g1_i20	2336	TRINITY_DN396_c0_g1_i20.p1	372	complete	2.3	85.7294	-1.19678	0.295361	-4.05191	5.08002e-05	0.0034962	27.3	8.4	5.3	2.5	Mitochondrion								136037.KDR03601	3.08e-99	309	COG2124@1|root,KOG0156@2759|Eukaryota,39GX9@33154|Opisthokonta,3B9BV@33208|Metazoa,3D32V@33213|Bilateria,41XFM@6656|Arthropoda,3SH7G@50557|Insecta	33208|Metazoa	Q	cytochrome p450	p450	-	-	1.14.14.1	ko:K07418	K07418	CYP2J	cytochrome P450 family 2 subfamily J [EC:1.14.14.1 1.14.14.73 1.14.14.74 1.14.14.75]	0	0	0	0	0	ko00590,ko00591,ko01100,ko04212,ko04726,ko04750,ko04913,map00590,map00591,map01100,map04212,map04726,map04750,map04913	-	R07042,R07043,R07044,R07045,R07046,R07048,R07050,R07051,R07052,R07055,R07056
1	100	Over	TRINITY_DN399_c0_g1_i7	3247	TRINITY_DN399_c0_g1_i7.p1	392	complete	236.8	24.1862	-7.88759	1.14554	-6.88545	5.76044e-12	2.27436e-09	7.7	0	2.7	0	Cytoplasm	Nuclear export signal							136037.KDR24082	2.73e-228	634	KOG3735@1|root,KOG3735@2759|Eukaryota,38DPW@33154|Opisthokonta,3B96P@33208|Metazoa,3CXCH@33213|Bilateria,41UXJ@6656|Arthropoda,3SHUQ@50557|Insecta	33208|Metazoa	Z	binding. It is involved in the biological process described with pointed-end actin filament capping	Tropomodulin	TMOD1	GO:0001654,GO:0001726,GO:0002064,GO:0002088,GO:0002119,GO:0002164,GO:0002262,GO:0002376,GO:0002520,GO:0003008,GO:0003012,GO:0003674,GO:0003779,GO:0005488,GO:0005515,GO:0005523,GO:0005575,GO:0005622,GO:0005623,GO:0005634,GO:0005737,GO:0005829,GO:0005856,GO:0005865,GO:0005884,GO:0005938,GO:0006928,GO:0006936,GO:0006996,GO:0007010,GO:0007015,GO:0007154,GO:0007267,GO:0007268,GO:0007270,GO:0007275,GO:…	-	ko:K10370,ko:K22030	K10370	TMOD	tropomodulin	K22030	LMOD	leiomodin	0	0	-	-	-
1	101	Over	TRINITY_DN412_c1_g1_i18	4045	TRINITY_DN412_c1_g1_i18.p1	323	complete	4.3	275.69	-2.08785	0.404098	-5.16668	2.38286e-07	3.64804e-05	56.9	9.9	11	5.9	Cytoplasm								136037.KDR08631	1.04e-202	564	KOG0819@1|root,KOG0819@2759|Eukaryota,38FEE@33154|Opisthokonta,3BCMH@33208|Metazoa,3CXS1@33213|Bilateria,420QF@6656|Arthropoda,3SQBK@50557|Insecta	33208|Metazoa	U	Annexin repeats	Annexin	-	GO:0001786,GO:0003674,GO:0005488,GO:0005515,GO:0005539,GO:0005543,GO:0005545,GO:0008201,GO:0008289,GO:0008429,GO:0035091,GO:0043167,GO:0043168,GO:0043394,GO:0043395,GO:0072341,GO:0097367,GO:1901681	-	ko:K17095	K17095	ANXA7_11	annexin A7/11	0	0	0	0	0	-	-	-
1	102	Over	TRINITY_DN4313_c0_g1_i1	1268	TRINITY_DN4313_c0_g1_i1.p1	318	complete	7.4	20.6161	-2.89677	0.749095	-3.86703	0.000110171	0.00629893	16.6	1.6	9.8	1.3	Mitochondrion	Mitochondrial transit peptide							136037.KDR18312	2.35e-136	397	COG1024@1|root,KOG1680@2759|Eukaryota,38CIA@33154|Opisthokonta,3BAKH@33208|Metazoa,3CWFG@33213|Bilateria,41YR4@6656|Arthropoda,3SMJM@50557|Insecta	33208|Metazoa	I	Enoyl-CoA hydratase/isomerase	ECH_1	ECHDC1	GO:0003674,GO:0003824,GO:0004300,GO:0005575,GO:0005622,GO:0005623,GO:0005737,GO:0005739,GO:0005829,GO:0006082,GO:0006629,GO:0006631,GO:0006635,GO:0008150,GO:0008152,GO:0009056,GO:0009062,GO:0009987,GO:0016042,GO:0016054,GO:0016829,GO:0016830,GO:0016831,GO:0016835,GO:0016836,GO:0019395,GO:0019752,GO:0030258,GO:0032787,GO:0034440,GO:0043226,GO:0043227,GO:0043229,GO:0043231,GO:0043436,GO:0044237,GO:…	4.1.1.41,4.1.1.94	ko:K18426	K18426	ECHDC1	ethylmalonyl-CoA/methylmalonyl-CoA decarboxylase [EC:4.1.1.94 4.1.1.-]	0	0	0	0	0	ko00640,map00640	-	R00923
1	103	Over	TRINITY_DN4409_c0_g2_i1	2146	TRINITY_DN4409_c0_g2_i1.p1	484	complete	4.5	52.3756	-2.18504	0.493939	-4.4237	9.70252e-06	0.000891246	21.2	3.4	10.4	0.8	Cell membrane|Lysosome/Vacuole	Transmembrane domain							136037.KDR11465	1.06e-270	748	COG0531@1|root,KOG1287@2759|Eukaryota,38BBK@33154|Opisthokonta,3B9U2@33208|Metazoa,3CR7T@33213|Bilateria,41X9Y@6656|Arthropoda,3SI4M@50557|Insecta	33208|Metazoa	E	amino acid transmembrane transporter activity. It is involved in the biological process described with amino acid transmembrane transport	AA_permease_2	SLC7A6	GO:0000820,GO:0000821,GO:0002376,GO:0003333,GO:0003674,GO:0005215,GO:0005342,GO:0005575,GO:0005622,GO:0005623,GO:0005886,GO:0005887,GO:0006082,GO:0006520,GO:0006521,GO:0006807,GO:0006810,GO:0006811,GO:0006812,GO:0006820,GO:0006865,GO:0006928,GO:0006950,GO:0006952,GO:0008150,GO:0008152,GO:0008509,GO:0008514,GO:0009605,GO:0009607,GO:0009620,GO:0009987,GO:0010565,GO:0015075,GO:0015171,GO:0015174,GO:…	-	ko:K13780,ko:K13867,ko:K13872	K13780	SLC7A5	solute carrier family 7 (L-type amino acid transporter), member 5	K13867	SLC7A7	solute carrier family 7 (L-type amino acid transporter), member 7	K13872	0	ko04150,ko04974,ko05230,map04150,map04974,map05230	-	-
1	104	Over	TRINITY_DN446_c0_g1_i2	3220	TRINITY_DN446_c0_g1_i2.p1	282	complete	2.1	1400.41	-1.06166	0.193757	-5.47934	4.26921e-08	7.94037e-06	306.7	104.2	23.5	28.8	Cytoplasm								136037.KDR18209	2.72e-166	469	KOG3126@1|root,KOG3126@2759|Eukaryota,38G4B@33154|Opisthokonta,3BA0A@33208|Metazoa,3CRFW@33213|Bilateria,41XPU@6656|Arthropoda,3SHAY@50557|Insecta	33208|Metazoa	P	Voltage-gated anion channel activity. It is involved in the biological process described with regulation of anion transport	Porin_3	VDAC2	GO:0000003,GO:0001662,GO:0001669,GO:0002209,GO:0003006,GO:0003008,GO:0003674,GO:0005215,GO:0005216,GO:0005244,GO:0005253,GO:0005261,GO:0005575,GO:0005622,GO:0005623,GO:0005737,GO:0005739,GO:0005740,GO:0005741,GO:0005759,GO:0005783,GO:0005791,GO:0006810,GO:0006811,GO:0006812,GO:0006820,GO:0006839,GO:0006863,GO:0006950,GO:0006952,GO:0006996,GO:0007005,GO:0007154,GO:0007165,GO:0007267,GO:0007268,GO:…	-	ko:K05862,ko:K15040,ko:K15041	K05862	VDAC1	voltage-dependent anion channel protein 1	K15040	VDAC2	voltage-dependent anion channel protein 2	K15041	0	ko04020,ko04022,ko04216,ko04217,ko04218,ko04621,ko04979,ko05012,ko05016,ko05161,ko05164,ko05166,ko05203,map04020,map04022,map04216,map04217,map04218,map04621,map04979,map05012,map05016,map05161,map05164,map05166,map05203	-	-
1	105	Over	TRINITY_DN468_c0_g1_i3	1699	TRINITY_DN468_c0_g1_i3.p1	209	5prime_partial	2.5	122.898	-1.32798	0.36358	-3.6525	0.000259701	0.0116194	56.4	15.4	14.4	3	Cytoplasm|Nucleus	Nuclear export signal							136037.KDR16565	1.74e-84	256	28WN4@1|root,2R3EE@2759|Eukaryota,38CTG@33154|Opisthokonta,3BGYQ@33208|Metazoa,3D44K@33213|Bilateria,41ZZ6@6656|Arthropoda,3SN1K@50557|Insecta	33208|Metazoa	S	It is involved in the biological process described with negative regulation of signal transduction	RTP801_C	DDIT4L	GO:0000003,GO:0001700,GO:0005575,GO:0005622,GO:0005623,GO:0005737,GO:0006915,GO:0006950,GO:0006979,GO:0007275,GO:0008150,GO:0008219,GO:0008258,GO:0009653,GO:0009790,GO:0009792,GO:0009966,GO:0009987,GO:0010646,GO:0012501,GO:0023051,GO:0032006,GO:0032501,GO:0032502,GO:0032504,GO:0040008,GO:0044424,GO:0044464,GO:0045926,GO:0048519,GO:0048583,GO:0048598,GO:0048856,GO:0050789,GO:0050794,GO:0050896,GO:…	-	-	0	0	0	0	0	0	0	0	-	-	-
1	106	Over	TRINITY_DN4697_c1_g1_i1	4504	TRINITY_DN4697_c1_g1_i1.p1	1203	complete	3.5	29.7189	-1.78661	0.547568	-3.2628	0.00110316	0.0337319	5.2	1	1.8	0.6	Cytoplasm	Nuclear localization signal							136037.KDR19624	0	1656	KOG4724@1|root,KOG4724@2759|Eukaryota,38GPD@33154|Opisthokonta,3BE3F@33208|Metazoa,3CZXX@33213|Bilateria,41Y3W@6656|Arthropoda,3SKDX@50557|Insecta	33208|Metazoa	T	GTPase-activator protein for Rho-like GTPases	RA,RhoGAP,RhoGEF	-	GO:0003674,GO:0005488,GO:0005515	-	ko:K20641	K20641	ARHGAP20	Rho GTPase-activating protein 20	0	0	0	0	0	-	-	-
1	107	Over	TRINITY_DN48_c0_g1_i11	3438	TRINITY_DN48_c0_g1_i11.p1	603	5prime_partial	3.5	103.703	-1.82768	0.54972	-3.32475	0.000884991	0.0284932	24.3	4.6	6	2.7	Mitochondrion	Mitochondrial transit peptide							136037.KDR17554	4.13e-279	779	COG0513@1|root,KOG0331@2759|Eukaryota,38D0V@33154|Opisthokonta,3BCQC@33208|Metazoa,3CTK2@33213|Bilateria,41XJ3@6656|Arthropoda,3SJG3@50557|Insecta	33208|Metazoa	A	Belongs to the DEAD box helicase family	DEAD,Helicase_C,P68HR	DDX17	GO:0000122,GO:0000375,GO:0000377,GO:0000380,GO:0000381,GO:0000398,GO:0000956,GO:0001837,GO:0002376,GO:0002682,GO:0002697,GO:0002831,GO:0003674,GO:0003676,GO:0003682,GO:0003712,GO:0003713,GO:0003723,GO:0003724,GO:0003729,GO:0003730,GO:0003824,GO:0004004,GO:0004386,GO:0005102,GO:0005488,GO:0005515,GO:0005516,GO:0005575,GO:0005622,GO:0005623,GO:0005634,GO:0005654,GO:0005681,GO:0005694,GO:0005700,GO:…	3.6.4.13	ko:K12823,ko:K13178	K12823	DDX5	ATP-dependent RNA helicase DDX5/DBP2 [EC:3.6.4.13]	K13178	DDX17	ATP-dependent RNA helicase DDX17 [EC:3.6.4.13]	0	0	ko03040,ko05202,ko05205,map03040,map05202,map05205	-	-
1	108	Over	TRINITY_DN486_c1_g1_i9	1475	TRINITY_DN486_c1_g1_i9.p1	381	complete	68	6.95408	-6.08646	1.62606	-3.74307	0.000181788	0.00899154	5.1	0	4.6	0	Nucleus	Nuclear localization signal|Nuclear export signal							7029.ACYPI40717-PA	7.5e-77	263	KOG1075@1|root,KOG1075@2759|Eukaryota,39TZY@33154|Opisthokonta,3BI15@33208|Metazoa,3CYKV@33213|Bilateria,420TT@6656|Arthropoda,3SQX5@50557|Insecta,3EDFZ@33342|Paraneoptera	33208|Metazoa	S	Reverse transcriptase (RNA-dependent DNA polymerase)	Exo_endo_phos_2,RVT_1	-	-	-	-	0	0	0	0	0	0	0	0	-	-	-
1	109	Over	TRINITY_DN487_c0_g1_i29	24485	TRINITY_DN487_c0_g1_i29.p1	7431	complete	754.1	77.0432	-9.55862	1.46733	-6.51431	7.30243e-11	2.39789e-08	3.1	0	1.9	0									132113.XP_003490119.1	0	11777	KOG0613@1|root,KOG4475@1|root,KOG0613@2759|Eukaryota,KOG4475@2759|Eukaryota,38BAS@33154|Opisthokonta,3B9IR@33208|Metazoa,3CRJW@33213|Bilateria,41WSG@6656|Arthropoda,3SJC8@50557|Insecta,46KQX@7399|Hymenoptera	33208|Metazoa	T	Immunoglobulin like	I-set,Ig_3,Pkinase,fn3	unc-22	GO:0003008,GO:0003012,GO:0003674,GO:0003779,GO:0003824,GO:0004672,GO:0004674,GO:0005198,GO:0005488,GO:0005515,GO:0005575,GO:0005622,GO:0005623,GO:0005737,GO:0005856,GO:0005859,GO:0006464,GO:0006468,GO:0006793,GO:0006796,GO:0006807,GO:0006936,GO:0006937,GO:0006941,GO:0006942,GO:0006996,GO:0007010,GO:0007015,GO:0007498,GO:0007610,GO:0007626,GO:0008092,GO:0008150,GO:0008152,GO:0008307,GO:0008344,GO:…	2.7.11.1	ko:K12567	K12567	TTN	titin [EC:2.7.11.1]	0	0	0	0	0	ko05410,ko05414,map05410,map05414	-	-
1	110	Over	TRINITY_DN487_c0_g1_i36	1685	TRINITY_DN487_c0_g1_i36.p1	561	internal	52.4	5.33993	-5.71046	1.23579	-4.6209	3.82077e-06	0.000413396	3.5	0	1.2	0	Cytoplasm	Nuclear localization signal							12957.ACEP22642-PA	1.62e-182	530	KOG4475@1|root,KOG4475@2759|Eukaryota,39UXD@33154|Opisthokonta,3BM9C@33208|Metazoa,3DDN2@33213|Bilateria,42AVT@6656|Arthropoda,3SRA9@50557|Insecta	33208|Metazoa	T	Immunoglobulin C-2 Type	I-set,Ig_3,fn3	-	-	2.7.11.1	ko:K12567,ko:K17341	K12567	TTN	titin [EC:2.7.11.1]	K17341	HMCN	hemicentin	0	0	ko05410,ko05414,map05410,map05414	-	-
1	111	Over	TRINITY_DN50131_c0_g1_i1	2413	TRINITY_DN50131_c0_g1_i1.p1	710	complete	3.2	27.43	-1.65866	0.352827	-4.70104	2.58835e-06	0.000298565	9.2	2	1.2	0.6	Cell membrane	Transmembrane domain							136037.KDR08842	3.24e-213	622	KOG3656@1|root,KOG3656@2759|Eukaryota,38BUX@33154|Opisthokonta,3BF5B@33208|Metazoa,3CW1W@33213|Bilateria,41X3T@6656|Arthropoda,3SHQZ@50557|Insecta	33208|Metazoa	T	G-protein coupled receptor activity. It is involved in the biological process described with G-protein coupled receptor signaling pathway	7tm_1	ador-1	GO:0001609,GO:0001973,GO:0003008,GO:0003674,GO:0004888,GO:0004930,GO:0005575,GO:0006109,GO:0007154,GO:0007165,GO:0007166,GO:0007186,GO:0007187,GO:0007188,GO:0007189,GO:0007267,GO:0007268,GO:0007610,GO:0007611,GO:0007612,GO:0008150,GO:0008306,GO:0009987,GO:0010959,GO:0016020,GO:0016021,GO:0019222,GO:0019932,GO:0019933,GO:0019935,GO:0023052,GO:0031224,GO:0032501,GO:0032879,GO:0035556,GO:0035586,GO:…	-	ko:K04266	K04266	ADORA2A	adenosine receptor A2a	0	0	0	0	0	ko04015,ko04020,ko04024,ko04080,ko04270,ko05012,ko05034,map04015,map04020,map04024,map04080,map04270,map05012,map05034	-	-
1	112	Over	TRINITY_DN502_c6_g1_i1	2328	TRINITY_DN502_c6_g1_i1.p2	105	complete	2.2	370.591	-1.12531	0.167737	-6.70876	1.96285e-11	7.01173e-09	116.3	37.2	9	4.6	Cytoplasm								6669.EFX83063	1.84e-46	151	COG0526@1|root,KOG0907@2759|Eukaryota,3A886@33154|Opisthokonta,3BSYW@33208|Metazoa,3D9CV@33213|Bilateria,420A5@6656|Arthropoda	33208|Metazoa	O	protein disulfide oxidoreductase activity. It is involved in the biological process described with	Thioredoxin	TXN	GO:0000122,GO:0000803,GO:0000806,GO:0001101,GO:0001678,GO:0001932,GO:0001934,GO:0003674,GO:0003824,GO:0004791,GO:0005488,GO:0005515,GO:0005575,GO:0005622,GO:0005623,GO:0005634,GO:0005694,GO:0005737,GO:0005829,GO:0005929,GO:0006355,GO:0006357,GO:0006457,GO:0006950,GO:0006952,GO:0006979,GO:0007154,GO:0007165,GO:0007267,GO:0007275,GO:0007568,GO:0008104,GO:0008150,GO:0008152,GO:0008283,GO:0008340,GO:…	-	ko:K03671	K03671	trxA	thioredoxin 1	0	0	0	0	0	ko04621,ko05418,map04621,map05418	-	-
1	113	Over	TRINITY_DN5175_c0_g2_i1	1811	TRINITY_DN5175_c0_g2_i1.p1	533	complete	144.4	24.456	-7.17417	1.14118	-6.2866	3.24503e-10	9.86883e-08	14.8	0	6.2	0.1	Cell membrane	Transmembrane domain							7091.BGIBMGA010160-TA	7.69e-21	96.3	KOG0254@1|root,KOG0254@2759|Eukaryota,38CBN@33154|Opisthokonta,3BKI5@33208|Metazoa,3D3E4@33213|Bilateria,41YG2@6656|Arthropoda,3SISP@50557|Insecta,444JM@7088|Lepidoptera	33208|Metazoa	P	Sugar (and other) transporter	Sugar_tr	-	-	-	ko:K08145	K08145	SLC2A8	MFS transporter, SP family, solute carrier family 2 (facilitated glucose transporter), member 8	0	0	0	0	0	-	-	-
1	114	Over	TRINITY_DN5435_c0_g1_i1	2959	TRINITY_DN5435_c0_g1_i1.p1	495	complete	4	245.902	-2.00426	0.602711	-3.32542	0.000882864	0.0284654	69.9	11.2	7.4	7.3	Cell membrane	Transmembrane domain							136037.KDR14996	1.31e-305	837	COG0531@1|root,KOG1287@2759|Eukaryota,38BBK@33154|Opisthokonta,3B9U2@33208|Metazoa,3CR7T@33213|Bilateria,41VZB@6656|Arthropoda,3SH1R@50557|Insecta	33208|Metazoa	E	amino acid transmembrane transporter activity. It is involved in the biological process described with amino acid transmembrane transport	AA_permease_2	SLC7A6	GO:0000820,GO:0000821,GO:0002376,GO:0003333,GO:0003674,GO:0005215,GO:0005342,GO:0005575,GO:0005622,GO:0005623,GO:0005886,GO:0005887,GO:0006082,GO:0006520,GO:0006521,GO:0006807,GO:0006810,GO:0006811,GO:0006820,GO:0006865,GO:0006928,GO:0008150,GO:0008152,GO:0008509,GO:0008514,GO:0009987,GO:0010565,GO:0015075,GO:0015171,GO:0015174,GO:0015179,GO:0015291,GO:0015297,GO:0015318,GO:0015711,GO:0015802,GO:…	-	ko:K03450,ko:K13780,ko:K13867,ko:K13872	K03450	SLC7A	Y+L amino acid transporter 2	K13780	SLC7A5	solute carrier family 7 (L-type amino acid transporter), member 5	K13867	K13872	ko04150,ko04974,ko05230,map04150,map04974,map05230	-	-
1	115	Over	TRINITY_DN5488_c0_g1_i2	1622	TRINITY_DN5488_c0_g1_i2.p1	241	complete	4	11.4167	-1.99884	0.590094	-3.38732	0.000705785	0.0244099	6.3	1.1	1.5	0.7	Cytoplasm								136037.KDR22870	6.52e-142	404	KOG0406@1|root,KOG0406@2759|Eukaryota,38D3D@33154|Opisthokonta,3BJ5E@33208|Metazoa,3CXTB@33213|Bilateria,41YJZ@6656|Arthropoda,3SJYR@50557|Insecta	33208|Metazoa	O	Glutathione transferase activity. It is involved in the biological process described with metabolic process	GST_C,GST_C_2,GST_C_3,GST_N_3	GSTO1	GO:0000302,GO:0003674,GO:0003824,GO:0004364,GO:0004734,GO:0005488,GO:0005515,GO:0005575,GO:0005576,GO:0005604,GO:0005622,GO:0005623,GO:0005634,GO:0005635,GO:0005737,GO:0005739,GO:0005829,GO:0005975,GO:0005996,GO:0006082,GO:0006518,GO:0006575,GO:0006725,GO:0006726,GO:0006728,GO:0006732,GO:0006749,GO:0006766,GO:0006767,GO:0006790,GO:0006805,GO:0006807,GO:0006873,GO:0006874,GO:0006875,GO:0006937,GO:…	1.5.4.1,2.5.1.18	ko:K00310,ko:K00799	K00310	SE	pyrimidodiazepine synthase [EC:1.5.4.1]	K00799	GST	glutathione S-transferase [EC:2.5.1.18]	0	0	ko00480,ko00790,ko00980,ko00982,ko00983,ko01524,ko05200,ko05204,ko05225,ko05418,map00480,map00790,map00980,map00982,map00983,map01524,map05200,map05204,map05225,map05418	-	R03522,R03984,R07002,R07003,R07004,R07023,R07024,R07025,R07026,R07069,R07070,R07083,R07084,R07091,R07092,R07093,R07094,R07100,R07113,R07116,R08280,R09409,R11905
1	116	Over	TRINITY_DN560_c0_g1_i33	9716	TRINITY_DN560_c0_g1_i33.p1	2697	complete	10.1	109.083	-3.33802	0.77427	-4.31118	1.62384e-05	0.00132408	10.3	0.7	6	0.4	Cytoplasm	Nuclear export signal							136037.KDR14371	0	4686	COG5021@1|root,KOG4276@2759|Eukaryota,39M9X@33154|Opisthokonta,3B97M@33208|Metazoa,3CXRM@33213|Bilateria,41XMY@6656|Arthropoda,3SK2D@50557|Insecta	33208|Metazoa	O	metal ion binding. It is involved in the biological process described with protein ubiquitination	Ank_2,Ank_5,HECT,MIB_HERC2,Sad1_UNC	HECTD1	GO:0000003,GO:0000209,GO:0001568,GO:0001701,GO:0001775,GO:0001779,GO:0001838,GO:0001841,GO:0001843,GO:0001890,GO:0001892,GO:0001944,GO:0002009,GO:0002376,GO:0002520,GO:0002521,GO:0003006,GO:0003170,GO:0003205,GO:0003231,GO:0003279,GO:0003281,GO:0003674,GO:0003824,GO:0004842,GO:0005575,GO:0005622,GO:0005623,GO:0005634,GO:0005737,GO:0006464,GO:0006508,GO:0006511,GO:0006807,GO:0007044,GO:0007275,GO:…	2.3.2.26	ko:K12231	K12231	HECTD1	E3 ubiquitin-protein ligase HECTD1 [EC:2.3.2.26]	0	0	0	0	0	-	-	-
1	117	Over	TRINITY_DN560_c0_g1_i36	9701	TRINITY_DN560_c0_g1_i36.p1	2692	complete	7.1	94.4713	-2.83575	0.574534	-4.93573	7.98496e-07	0.000109574	8.7	0.9	1.9	0.6	Cytoplasm	Nuclear export signal							136037.KDR14371	0	4670	COG5021@1|root,KOG4276@2759|Eukaryota,39M9X@33154|Opisthokonta,3B97M@33208|Metazoa,3CXRM@33213|Bilateria,41XMY@6656|Arthropoda,3SK2D@50557|Insecta	33208|Metazoa	O	metal ion binding. It is involved in the biological process described with protein ubiquitination	Ank_2,Ank_5,HECT,MIB_HERC2,Sad1_UNC	HECTD1	GO:0000003,GO:0000209,GO:0001568,GO:0001701,GO:0001775,GO:0001779,GO:0001838,GO:0001841,GO:0001843,GO:0001890,GO:0001892,GO:0001944,GO:0002009,GO:0002376,GO:0002520,GO:0002521,GO:0003006,GO:0003170,GO:0003205,GO:0003231,GO:0003279,GO:0003281,GO:0003674,GO:0003824,GO:0004842,GO:0005575,GO:0005622,GO:0005623,GO:0005634,GO:0005737,GO:0006464,GO:0006508,GO:0006511,GO:0006807,GO:0007044,GO:0007275,GO:…	2.3.2.26	ko:K12231	K12231	HECTD1	E3 ubiquitin-protein ligase HECTD1 [EC:2.3.2.26]	0	0	0	0	0	-	-	-
1	118	Over	TRINITY_DN5639_c0_g1_i4	2034	TRINITY_DN5639_c0_g1_i4.p1	505	5prime_partial	29.5	139.961	-4.88304	1.18093	-4.13491	3.55101e-05	0.00261162	71.7	2	37.9	2.9	Extracellular	Signal peptide							136037.KDR18093	5.15e-256	714	COG0366@1|root,KOG2212@2759|Eukaryota,38FZ6@33154|Opisthokonta,3BEV2@33208|Metazoa,3CZ5I@33213|Bilateria,41UVV@6656|Arthropoda,3SHUI@50557|Insecta	33208|Metazoa	G	activity. It is involved in the biological process described with carbohydrate metabolic process	Alpha-amylase,Alpha-amylase_C	Amyrel	GO:0003674,GO:0003824,GO:0004553,GO:0004556,GO:0005488,GO:0005509,GO:0005575,GO:0005576,GO:0005975,GO:0008150,GO:0008152,GO:0016160,GO:0016787,GO:0016798,GO:0043167,GO:0043169,GO:0044238,GO:0046872,GO:0071704	3.2.1.1	ko:K01176	K01176	AMY	alpha-amylase [EC:3.2.1.1]	0	0	0	0	0	ko00500,ko01100,ko04973,map00500,map01100,map04973	-	R02108,R02112,R11262
1	119	Over	TRINITY_DN579_c0_g1_i5	5791	TRINITY_DN579_c0_g1_i5.p2	387	complete	5.5	85.3407	-2.45991	0.704286	-3.49277	0.000478039	0.0182035	12.8	1.8	5.3	2.2	Cytoplasm								136037.KDR10755	1.09e-272	749	KOG1954@1|root,KOG1954@2759|Eukaryota,38XK5@33154|Opisthokonta,3BBJ3@33208|Metazoa,3CVUG@33213|Bilateria,41VU7@6656|Arthropoda,3SJ40@50557|Insecta	33208|Metazoa	TU	Belongs to the TRAFAC class dynamin-like GTPase superfamily. Dynamin Fzo YdjA family	Dynamin_N,EHD_N	SRL	GO:0002115,GO:0005575,GO:0005622,GO:0005623,GO:0005737,GO:0005783,GO:0005788,GO:0006810,GO:0006811,GO:0006812,GO:0006816,GO:0008150,GO:0012505,GO:0014823,GO:0014850,GO:0014873,GO:0014874,GO:0016528,GO:0016529,GO:0030001,GO:0031974,GO:0033018,GO:0043226,GO:0043227,GO:0043229,GO:0043231,GO:0043233,GO:0043502,GO:0044057,GO:0044422,GO:0044424,GO:0044432,GO:0044444,GO:0044446,GO:0044464,GO:0048583,GO:…	-	-	0	0	0	0	0	0	0	0	-	-	-
1	120	Over	TRINITY_DN581_c2_g2_i2	1714	TRINITY_DN581_c2_g2_i2.p1	236	complete	9.3	52.0822	-3.21021	0.732555	-4.38221	1.17481e-05	0.00104503	30.2	2.5	14.6	3.1	Extracellular	Signal peptide							136037.KDR10083	5.44e-123	355	2E93Y@1|root,2SFHR@2759|Eukaryota,3AAH2@33154|Opisthokonta,3BV1N@33208|Metazoa,3DBKW@33213|Bilateria,423JQ@6656|Arthropoda,3SRS0@50557|Insecta	33208|Metazoa	S	C-type lectin (CTL) or carbohydrate-recognition domain (CRD)	Lectin_C	-	-	-	-	0	0	0	0	0	0	0	0	-	-	-
1	121	Over	TRINITY_DN5834_c0_g3_i1	1801	TRINITY_DN5834_c0_g3_i1.p1	383	complete	473.8	48.3573	-8.88817	1.16519	-7.62808	2.38272e-14	1.57715e-11	29.4	0	12.9	0	Extracellular	Signal peptide							136037.KDR14665	2.71e-155	447	COG2017@1|root,KOG1604@2759|Eukaryota,39TA3@33154|Opisthokonta,3BJ1Q@33208|Metazoa,3CZZ7@33213|Bilateria,41XJ8@6656|Arthropoda,3SGB9@50557|Insecta	33208|Metazoa	G	Converts alpha-aldose to the beta-anomer	Aldose_epim	-	GO:0003674,GO:0003824,GO:0004034,GO:0005975,GO:0005996,GO:0006006,GO:0006012,GO:0008150,GO:0008152,GO:0009056,GO:0016052,GO:0016853,GO:0016854,GO:0016857,GO:0019318,GO:0019320,GO:0019388,GO:0033499,GO:0044238,GO:0044281,GO:0044282,GO:0046365,GO:0071704,GO:1901575	5.1.3.3	ko:K01785	K01785	galM	aldose 1-epimerase [EC:5.1.3.3]	0	0	0	0	0	ko00010,ko00052,ko01100,ko01110,ko01120,ko01130,map00010,map00052,map01100,map01110,map01120,map01130	M00632	R01602,R10619
1	122	Over	TRINITY_DN6090_c0_g3_i2	1954	TRINITY_DN6090_c0_g3_i2.p1	462	complete	3.5	3094.18	-1.79836	0.519306	-3.463	0.00053418	0.0198051	1317.8	257.7	258.6	163.4	Cytoplasm|Nucleus	Nuclear localization signal							136037.KDR17161	0	917	COG5256@1|root,KOG0052@2759|Eukaryota,38G33@33154|Opisthokonta,3BB5I@33208|Metazoa,3CZIS@33213|Bilateria,41TFC@6656|Arthropoda,3SIW3@50557|Insecta	33208|Metazoa	J	This protein promotes the GTP-dependent binding of aminoacyl-tRNA to the A-site of ribosomes during protein biosynthesis	GTP_EFTU,GTP_EFTU_D2,GTP_EFTU_D3	EEF1A1	GO:0000049,GO:0000166,GO:0000323,GO:0001726,GO:0001775,GO:0001882,GO:0001883,GO:0002252,GO:0002263,GO:0002274,GO:0002275,GO:0002283,GO:0002366,GO:0002376,GO:0002443,GO:0002444,GO:0002446,GO:0003674,GO:0003676,GO:0003723,GO:0003729,GO:0003746,GO:0003824,GO:0003924,GO:0005488,GO:0005515,GO:0005516,GO:0005525,GO:0005575,GO:0005576,GO:0005622,GO:0005623,GO:0005634,GO:0005730,GO:0005737,GO:0005764,GO:…	-	ko:K03231,ko:K13199	K03231	EEF1A	elongation factor 1-alpha	K13199	SERBP1	plasminogen activator inhibitor 1 RNA-binding protein	0	0	ko03013,ko05134,map03013,map05134	-	-
1	123	Over	TRINITY_DN6274_c0_g1_i1	3607	TRINITY_DN6274_c0_g1_i1.p1	726	complete	5	70.53	-2.31325	0.596346	-3.87905	0.000104866	0.00617801	17.1	2.6	4.9	2.2	Mitochondrion								136037.KDR20045	2.53e-207	611	KOG2279@1|root,KOG2279@2759|Eukaryota,39SYC@33154|Opisthokonta,3BBCI@33208|Metazoa,3CRZ5@33213|Bilateria,41VUQ@6656|Arthropoda,3SKHF@50557|Insecta	33208|Metazoa	T	RNA binding	KH_1,RII_binding_1,TUDOR	AKAP1	GO:0000003,GO:0001667,GO:0002009,GO:0002064,GO:0002065,GO:0002066,GO:0003002,GO:0003006,GO:0003008,GO:0003674,GO:0005198,GO:0005488,GO:0005515,GO:0005575,GO:0005622,GO:0005623,GO:0005737,GO:0005739,GO:0005740,GO:0005741,GO:0005743,GO:0005759,GO:0005783,GO:0005794,GO:0005811,GO:0005829,GO:0005886,GO:0006082,GO:0006091,GO:0006099,GO:0006101,GO:0006403,GO:0006928,GO:0006950,GO:0006996,GO:0007163,GO:…	-	ko:K16518	K16518	AKAP1	A-kinase anchor protein 1, mitochondrial	0	0	0	0	0	-	-	-
1	124	Over	TRINITY_DN6392_c0_g2_i1	2310	TRINITY_DN6392_c0_g2_i1.p1	510	complete	14.8	15.0661	-3.89147	0.90763	-4.28751	1.80686e-05	0.00145227	6.5	0.3	3	0.3	Endoplasmic reticulum	Signal peptide|Transmembrane domain							136037.KDR15961	1.32e-193	557	COG2124@1|root,KOG0158@2759|Eukaryota,3AJZY@33154|Opisthokonta,3C01H@33208|Metazoa,3DGC6@33213|Bilateria	33208|Metazoa	Q	Cytochrome P450	p450	-	-	-	ko:K14999	K14999	CYP6	cytochrome P450 family 6 [EC:1.14.-.-]	0	0	0	0	0	-	-	-
1	125	Over	TRINITY_DN642_c0_g1_i12	11558	TRINITY_DN642_c0_g1_i12.p1	3776	complete	5.1	185.694	-2.34804	0.622215	-3.77368	0.000160857	0.00827364	13.6	1.9	9.1	1	Extracellular	Signal peptide							136037.KDR15334	0	4016	KOG4292@1|root,KOG4292@2759|Eukaryota,3949K@33154|Opisthokonta,3BGFY@33208|Metazoa,3CUBZ@33213|Bilateria,41X03@6656|Arthropoda,3SJ5A@50557|Insecta	33208|Metazoa	T	It is involved in the biological process described with receptor-mediated endocytosis	CUB,EGF,EGF_3,EGF_CA,hEGF	-	GO:0003008,GO:0003014,GO:0008150,GO:0032501,GO:0070293,GO:0097017,GO:0097205,GO:0097206	-	ko:K14616	K14616	CUBN	cubilin	0	0	0	0	0	ko04977,map04977	-	-
1	126	Over	TRINITY_DN642_c0_g1_i14	11597	TRINITY_DN642_c0_g1_i14.p1	3789	complete	245	103.569	-7.93647	1.21472	-6.53359	6.42111e-11	2.1895e-08	8.8	0	7.8	0	Extracellular	Signal peptide							136037.KDR15334	0	4011	KOG4292@1|root,KOG4292@2759|Eukaryota,3949K@33154|Opisthokonta,3BGFY@33208|Metazoa,3CUBZ@33213|Bilateria,41X03@6656|Arthropoda,3SJ5A@50557|Insecta	33208|Metazoa	T	It is involved in the biological process described with receptor-mediated endocytosis	CUB,EGF,EGF_3,EGF_CA,hEGF	-	GO:0003008,GO:0003014,GO:0008150,GO:0032501,GO:0070293,GO:0097017,GO:0097205,GO:0097206	-	ko:K14616	K14616	CUBN	cubilin	0	0	0	0	0	ko04977,map04977	-	-
1	127	Over	TRINITY_DN6663_c3_g1_i2	5705	TRINITY_DN6663_c3_g1_i2.p1	1349	complete	14.5	27.6482	-3.85625	0.59898	-6.43804	1.21028e-10	3.83625e-08	4.7	0.2	0.5	0.2	Cell membrane	Transmembrane domain							136037.KDR16950	0	1553	KOG1172@1|root,KOG1172@2759|Eukaryota,38BCI@33154|Opisthokonta,3BA46@33208|Metazoa,3CU8U@33213|Bilateria,41X4S@6656|Arthropoda,3SG8P@50557|Insecta	33208|Metazoa	P	Inorganic anion exchanger activity. It is involved in the biological process described with anion transport	Band_3_cyto,HCO3_cotransp	SLC4A3	GO:0000003,GO:0003674,GO:0005215,GO:0005452,GO:0005488,GO:0005515,GO:0005575,GO:0005623,GO:0005886,GO:0005887,GO:0006810,GO:0006811,GO:0006812,GO:0006814,GO:0006820,GO:0006821,GO:0006873,GO:0006885,GO:0007275,GO:0007276,GO:0007283,GO:0008150,GO:0008324,GO:0008509,GO:0008510,GO:0008514,GO:0009987,GO:0015075,GO:0015077,GO:0015081,GO:0015103,GO:0015106,GO:0015108,GO:0015291,GO:0015293,GO:0015294,GO:…	-	ko:K13855,ko:K13856	K13855	SLC4A2	solute carrier family 4 (anion exchanger), member 2	K13856	SLC4A3	solute carrier family 4 (anion exchanger), member 3	0	0	ko04970,ko04971,ko04972,ko04976,map04970,map04971,map04972,map04976	-	-
1	128	Over	TRINITY_DN6682_c1_g2_i6	1983	TRINITY_DN6682_c1_g2_i6.p1	328	complete	63.2	6.4649	-5.9817	1.44857	-4.12937	3.63762e-05	0.0026666	3.6	0	2.9	0	Cytoplasm|Nucleus	Nuclear localization signal|Nuclear export signal							136037.KDR22420	6.32e-84	274	KOG3002@1|root,KOG3002@2759|Eukaryota	2759|Eukaryota	S	ubiquitin-dependent protein catabolic process	Sina	-	-	2.3.2.27	ko:K04506	K04506	SIAH1	E3 ubiquitin-protein ligase SIAH1 [EC:2.3.2.27]	0	0	0	0	0	ko04013,ko04115,ko04120,ko04310,map04013,map04115,map04120,map04310	-	-
1	129	Over	TRINITY_DN6970_c0_g1_i1	2238	TRINITY_DN6970_c0_g1_i1.p1	453	complete	92.4	9.40831	-6.53029	1.20948	-5.39924	6.69249e-08	1.17668e-05	4.5	0	2.1	0	Cytoplasm	Nuclear export signal							7165.AGAP010510-PA	1,34e-312	853	COG5023@1|root,KOG1375@2759|Eukaryota,39UA7@33154|Opisthokonta,3BNUY@33208|Metazoa,3D0U6@33213|Bilateria,41WRD@6656|Arthropoda,3SKK3@50557|Insecta,451ZP@7147|Diptera,45G5E@7148|Nematocera	33208|Metazoa	Z	Tubulin is the major constituent of microtubules. It binds two moles of GTP, one at an exchangeable site on the beta chain and one at a non-exchangeable site on the alpha chain	Tubulin,Tubulin_C	-	GO:0000902,GO:0000904,GO:0003674,GO:0005198,GO:0005200,GO:0005575,GO:0005622,GO:0005623,GO:0005856,GO:0005874,GO:0006928,GO:0006935,GO:0006996,GO:0007010,GO:0007017,GO:0007275,GO:0007399,GO:0007409,GO:0007411,GO:0007507,GO:0007610,GO:0008150,GO:0009314,GO:0009416,GO:0009605,GO:0009628,GO:0009653,GO:0009987,GO:0015630,GO:0016043,GO:0022008,GO:0030030,GO:0030154,GO:0030182,GO:0030537,GO:0031175,GO:…	-	ko:K07375	K07375	TUBB	tubulin beta	0	0	0	0	0	ko04145,ko04540,ko05130,map04145,map04540,map05130	-	-
1	130	Over	TRINITY_DN7006_c0_g1_i1	699	TRINITY_DN7006_c0_g1_i1.p1	150	complete	12.4	11.91	-3.63292	0.947072	-3.83595	0.00012508	0.00678293	20.1	1.2	10.7	1.5	Cytoplasm	Nuclear export signal							136037.KDR21640	2.95e-96	281	COG5126@1|root,KOG0027@2759|Eukaryota,3A10J@33154|Opisthokonta,3BPEV@33208|Metazoa,3D6F5@33213|Bilateria,41YUZ@6656|Arthropoda,3SKYW@50557|Insecta	33208|Metazoa	T	Calcium ion binding	EF-hand_1,EF-hand_6,EF-hand_7,EF-hand_8,EF-hand_9	TpnCII	-	-	-	0	0	0	0	0	0	0	0	-	-	-
1	131	Over	TRINITY_DN71944_c0_g1_i1	1686	TRINITY_DN71944_c0_g1_i1.p1	423	complete	19.5	27.43	-4.28601	0.895457	-4.7864	1.69802e-06	0.000208819	17	0.6	11.2	0.7	Cell membrane	Signal peptide|Transmembrane domain							136037.KDR17728	2.26e-107	330	KOG3646@1|root,KOG3646@2759|Eukaryota,39N5V@33154|Opisthokonta,3CPR5@33208|Metazoa,3E5W9@33213|Bilateria,42AZ9@6656|Arthropoda,3T0D5@50557|Insecta	33208|Metazoa	U	Neurotransmitter-gated ion-channel ligand binding domain	Neur_chan_LBD	-	-	-	-	0	0	0	0	0	0	0	0	-	-	-
1	132	Over	TRINITY_DN738_c0_g1_i8	3025	TRINITY_DN738_c0_g1_i8.p1	204	complete	2.1	559.152	-1.03973	0.286452	-3.62968	0.00028377	0.0124005	130.4	44.1	29.3	9.4	Cytoplasm								136037.KDR24333	1.45e-104	306	KOG1695@1|root,KOG1695@2759|Eukaryota,3A0VE@33154|Opisthokonta,3BPKD@33208|Metazoa,3D6PY@33213|Bilateria,41YRA@6656|Arthropoda,3T0UU@50557|Insecta	33208|Metazoa	O	Glutathione	GST_C_3,GST_N	-	-	2.5.1.18,5.3.99.2	ko:K00799,ko:K04097	K00799	GST	glutathione S-transferase [EC:2.5.1.18]	K04097	HPGDS	prostaglandin-H2 D-isomerase / glutathione transferase [EC:5.3.99.2 2.5.1.18]	0	0	ko00480,ko00590,ko00980,ko00982,ko00983,ko01100,ko01524,ko05200,ko05204,ko05225,ko05418,map00480,map00590,map00980,map00982,map00983,map01100,map01524,map05200,map05204,map05225,map05418	-	R02266,R03522,R07002,R07003,R07004,R07023,R07024,R07025,R07026,R07069,R07070,R07083,R07084,R07091,R07092,R07093,R07094,R07100,R07113,R07116,R08280,R09409,R11905
1	133	Over	TRINITY_DN754_c4_g1_i1	1430	TRINITY_DN754_c4_g1_i1.p1	172	complete	4.1	35.9298	-2.02468	0.634243	-3.19228	0.00141156	0.0404907	22.6	4.3	5.1	4.8	Mitochondrion	Mitochondrial transit peptide							136037.KDR22816	5.95e-56	181	KOG3591@1|root,KOG3591@2759|Eukaryota,38HJY@33154|Opisthokonta,3BV9A@33208|Metazoa,3DBV7@33213|Bilateria,4213I@6656|Arthropoda,3SRE7@50557|Insecta	33208|Metazoa	O	Hsp20/alpha crystallin family	HSP20	-	GO:0003674,GO:0005488,GO:0005515,GO:0005575,GO:0005622,GO:0005623,GO:0005737,GO:0005794,GO:0005795,GO:0005797,GO:0006950,GO:0006986,GO:0007154,GO:0007165,GO:0008150,GO:0009266,GO:0009408,GO:0009628,GO:0009987,GO:0010033,GO:0012505,GO:0023052,GO:0030968,GO:0031984,GO:0031985,GO:0033554,GO:0034620,GO:0034976,GO:0035966,GO:0035967,GO:0042221,GO:0043226,GO:0043227,GO:0043229,GO:0043231,GO:0044422,GO:…	-	ko:K19766	K19766	HSP16.1	heat shock protein Hsp-16.1/Hsp-16.11	0	0	0	0	0	ko04212,ko04213,map04212,map04213	-	-
1	134	Over	TRINITY_DN76_c1_g1_i6	5030	TRINITY_DN76_c1_g1_i6.p1	1345	complete	244.4	24.9489	-7.93291	1.92618	-4.11846	3.81412e-05	0.00276859	5.1	0	4.3	0	Cell membrane|Lysosome/Vacuole	Transmembrane domain							136037.KDR11623	0	2002	COG1132@1|root,KOG0054@2759|Eukaryota,38CH6@33154|Opisthokonta,3BDC6@33208|Metazoa,3CXM9@33213|Bilateria,41XS5@6656|Arthropoda,3SJJA@50557|Insecta	33208|Metazoa	Q	It is involved in the biological process described with transmembrane transport	ABC_membrane,ABC_tran	ABCC4	GO:0002576,GO:0003674,GO:0003824,GO:0005215,GO:0005575,GO:0005622,GO:0005623,GO:0005737,GO:0005886,GO:0005887,GO:0006810,GO:0006811,GO:0006820,GO:0006869,GO:0006887,GO:0006996,GO:0008150,GO:0008152,GO:0008509,GO:0009987,GO:0010876,GO:0012505,GO:0012506,GO:0015075,GO:0015103,GO:0015318,GO:0015399,GO:0015405,GO:0015662,GO:0015698,GO:0015711,GO:0015718,GO:0015732,GO:0015849,GO:0015908,GO:0016020,GO:…	-	ko:K05673	K05673	ABCC4	ATP-binding cassette, subfamily C (CFTR/MRP), member 4	0	0	0	0	0	ko01523,ko02010,ko04024,ko04976,map01523,map02010,map04024,map04976	-	-
1	135	Over	TRINITY_DN777_c0_g1_i6	14849	TRINITY_DN777_c0_g1_i6.p1	4853	3prime_partial	3.9	361.805	-1.97732	0.515381	-3.83662	0.000124741	0.00678293	19.6	3.5	6	1.8	Cytoplasm	Nuclear localization signal							7460.GB47977-PA	0	7670	KOG0613@1|root,KOG1181@1|root,KOG1216@1|root,KOG4240@1|root,KOG4475@1|root,KOG0613@2759|Eukaryota,KOG1181@2759|Eukaryota,KOG1216@2759|Eukaryota,KOG4240@2759|Eukaryota,KOG4475@2759|Eukaryota,38BAS@33154|Opisthokonta,3B9IR@33208|Metazoa,3CRJW@33213|Bilateria,41TW3@6656|Arthropoda,3SJ0H@50557|Insecta,46DWX@7399|Hymenoptera	33208|Metazoa	T	Repeat of unknown function (DUF1136)	DUF1136,I-set,Ig_3,Pkinase,SH3_1,SH3_9,fn3	sls	GO:0000070,GO:0000228,GO:0000278,GO:0000280,GO:0000768,GO:0000793,GO:0000794,GO:0000819,GO:0002682,GO:0003674,GO:0003779,GO:0005198,GO:0005488,GO:0005515,GO:0005575,GO:0005622,GO:0005623,GO:0005634,GO:0005694,GO:0005737,GO:0005856,GO:0005859,GO:0005863,GO:0006323,GO:0006949,GO:0006996,GO:0007010,GO:0007049,GO:0007059,GO:0007062,GO:0007076,GO:0007275,GO:0007498,GO:0007517,GO:0007519,GO:0007520,GO:…	2.7.11.1	ko:K12567	K12567	TTN	titin [EC:2.7.11.1]	0	0	0	0	0	ko05410,ko05414,map05410,map05414	-	-
1	136	Over	TRINITY_DN783_c3_g1_i1	3659	TRINITY_DN783_c3_g1_i1.p1	619	5prime_partial	60.3	6.15776	-5.91394	1.86408	-3.17257	0.00151095	0.0425581	1.8	0	1.6	0	Cytoplasm	Nuclear localization signal							136037.KDR23229	7.87e-192	559	KOG0118@1|root,KOG0118@2759|Eukaryota,39V3F@33154|Opisthokonta,3BDSB@33208|Metazoa,3CU7R@33213|Bilateria,41Z3W@6656|Arthropoda,3SMA2@50557|Insecta	33208|Metazoa	A	translation Initiation Factor	RRM_1	EIF4B	GO:0001731,GO:0002181,GO:0002183,GO:0003674,GO:0003676,GO:0003723,GO:0003725,GO:0003727,GO:0003729,GO:0003743,GO:0003824,GO:0004386,GO:0005488,GO:0005575,GO:0005622,GO:0005623,GO:0005737,GO:0005829,GO:0005844,GO:0006412,GO:0006413,GO:0006417,GO:0006446,GO:0006518,GO:0006807,GO:0008135,GO:0008150,GO:0008152,GO:0008283,GO:0009058,GO:0009059,GO:0009889,GO:0009987,GO:0010467,GO:0010468,GO:0010556,GO:…	-	ko:K03258	K03258	EIF4B	translation initiation factor 4B	0	0	0	0	0	ko03013,ko04150,ko04151,ko05205,map03013,map04150,map04151,map05205	-	-
1	137	Over	TRINITY_DN7896_c0_g1_i2	5260	TRINITY_DN7896_c0_g1_i2.p1	1217	complete	125.1	12.8189	-6.967	1.28813	-5.40864	6.35061e-08	1.13429e-05	2.5	0	1.4	0	Nucleus	Nuclear localization signal|Nuclear export signal							136037.KDR10918	0	2333	KOG1525@1|root,KOG1525@2759|Eukaryota,38H93@33154|Opisthokonta,3BE3G@33208|Metazoa,3CUTC@33213|Bilateria,41YE7@6656|Arthropoda,3SJZ4@50557|Insecta	33208|Metazoa	D	Sister chromatid cohesion protein PDS5 homolog	-	PDS5A	GO:0000003,GO:0000070,GO:0000166,GO:0000278,GO:0000280,GO:0000775,GO:0000785,GO:0000819,GO:0001654,GO:0001655,GO:0001656,GO:0001822,GO:0002088,GO:0003002,GO:0003006,GO:0003007,GO:0003674,GO:0003676,GO:0003677,GO:0005488,GO:0005524,GO:0005575,GO:0005622,GO:0005623,GO:0005634,GO:0005654,GO:0005694,GO:0005700,GO:0005737,GO:0005829,GO:0005886,GO:0006139,GO:0006259,GO:0006275,GO:0006281,GO:0006725,GO:…	-	ko:K11267	K11267	PDS5	sister chromatid cohesion protein PDS5	0	0	0	0	0	-	-	-
1	138	Over	TRINITY_DN804_c0_g2_i1	1442	TRINITY_DN804_c0_g2_i1.p1	388	5prime_partial	3.1	243.057	-1.61246	0.421075	-3.82938	0.000128466	0.00689102	141.2	30.9	7.7	13	Cytoplasm|Nucleus	Nuclear localization signal|Nuclear export signal							164328.Phyra81824	5.28e-17	89.7	298M8@1|root,2RFN4@2759|Eukaryota,3QH2K@4776|Peronosporales	4776|Peronosporales	0	-	DDE_3	-	-	-	-	0	0	0	0	0	0	0	0	-	-	-
1	139	Over	TRINITY_DN8077_c0_g3_i1	1220	TRINITY_DN8077_c0_g3_i1.p1	200	complete	3.4	15.595	-1.77703	0.551827	-3.22026	0.00128073	0.0376436	11.2	2.3	1.3	1.3	Endoplasmic reticulum	Transmembrane domain							136037.KDR09808	5.82e-63	201	2CHIK@1|root,2QQ1U@2759|Eukaryota,38FCY@33154|Opisthokonta,3BGQI@33208|Metazoa,3CYJU@33213|Bilateria,420J7@6656|Arthropoda,3SNQZ@50557|Insecta	33208|Metazoa	S	Chromosome 5 open reading frame 28	YdjM	C5orf28	-	-	-	0	0	0	0	0	0	0	0	-	-	-
1	140	Over	TRINITY_DN82229_c0_g1_i1	2045	TRINITY_DN82229_c0_g1_i1.p1	562	complete	3.2	29.4325	-1.69458	0.474874	-3.56849	0.000359049	0.0146916	11.7	2.5	0.8	1.2	Cytoplasm								136037.KDR18213	0	923	COG1260@1|root,KOG0693@2759|Eukaryota,38ZP0@33154|Opisthokonta,3BAFN@33208|Metazoa,3CTZ3@33213|Bilateria,41U2C@6656|Arthropoda,3SHNJ@50557|Insecta	33208|Metazoa	I	Inositol-3-phosphate synthase activity. It is involved in the biological process described with	Inos-1-P_synth,NAD_binding_5	ISYNA1	GO:0003674,GO:0003824,GO:0004512,GO:0005575,GO:0005622,GO:0005623,GO:0005737,GO:0005829,GO:0005975,GO:0006020,GO:0006021,GO:0006066,GO:0006793,GO:0006796,GO:0008150,GO:0008152,GO:0009058,GO:0009987,GO:0016051,GO:0016853,GO:0016872,GO:0019637,GO:0019751,GO:0034637,GO:0043647,GO:0044237,GO:0044238,GO:0044249,GO:0044262,GO:0044281,GO:0044283,GO:0044424,GO:0044444,GO:0044464,GO:0046165,GO:0046173,GO:…	5.5.1.4	ko:K01858	K01858	INO1	myo-inositol-1-phosphate synthase [EC:5.5.1.4]	0	0	0	0	0	ko00521,ko00562,ko01100,ko01130,map00521,map00562,map01100,map01130	-	R07324
1	141	Over	TRINITY_DN83026_c0_g1_i1	1445	TRINITY_DN83026_c0_g1_i1.p1	376	complete	140.8	23.7965	-7.13708	1.09514	-6.51705	7.17024e-11	2.39789e-08	18.2	0.1	3.1	0.1	Mitochondrion								1026970.XP_008830276.1	3.22e-177	503	KOG0767@1|root,KOG0767@2759|Eukaryota,38DBA@33154|Opisthokonta,3BEZJ@33208|Metazoa,3CRI0@33213|Bilateria,47Z0V@7711|Chordata,49206@7742|Vertebrata,3JF9H@40674|Mammalia,35M48@314146|Euarchontoglires,4Q8JX@9989|Rodentia	33208|Metazoa	C	phosphate ion transmembrane transporter activity	Mito_carr	SLC25A3	GO:0003002,GO:0003674,GO:0005215,GO:0005488,GO:0005575,GO:0005622,GO:0005623,GO:0005737,GO:0005739,GO:0005740,GO:0005743,GO:0005886,GO:0005887,GO:0006810,GO:0006811,GO:0006812,GO:0006817,GO:0006820,GO:0006839,GO:0007275,GO:0007389,GO:0007444,GO:0007447,GO:0007450,GO:0008150,GO:0008324,GO:0008509,GO:0009888,GO:0009953,GO:0015075,GO:0015077,GO:0015078,GO:0015103,GO:0015114,GO:0015291,GO:0015293,GO:…	-	ko:K15102	K15102	SLC25A3	solute carrier family 25 (mitochondrial phosphate transporter), member 3	0	0	0	0	0	-	-	-
1	142	Over	TRINITY_DN8315_c0_g1_i6	2310	TRINITY_DN8315_c0_g1_i6.p1	227	5prime_partial	9.6	41.4779	-3.25652	0.538366	-6.04889	1.45845e-09	3.95451e-07	17.5	1.3	9	0.6	Cytoplasm								136037.KDR11923	1.39e-82	258	COG0626@1|root,KOG0053@2759|Eukaryota,38CST@33154|Opisthokonta,3BFVK@33208|Metazoa,3CXAE@33213|Bilateria,41XH4@6656|Arthropoda,3SGQ3@50557|Insecta	33208|Metazoa	E	pyridoxal phosphate binding	Cys_Met_Meta_PP	CTH	GO:0000096,GO:0000097,GO:0000098,GO:0001558,GO:0003674,GO:0003824,GO:0003962,GO:0004121,GO:0004123,GO:0005488,GO:0005515,GO:0005575,GO:0005622,GO:0005623,GO:0005737,GO:0005829,GO:0006082,GO:0006355,GO:0006464,GO:0006518,GO:0006520,GO:0006534,GO:0006555,GO:0006575,GO:0006749,GO:0006750,GO:0006790,GO:0006807,GO:0006950,GO:0006986,GO:0007154,GO:0007165,GO:0008144,GO:0008150,GO:0008152,GO:0008285,GO:…	4.4.1.1	ko:K01758	K01758	CTH	cystathionine gamma-lyase [EC:4.4.1.1]	0	0	0	0	0	ko00260,ko00270,ko00450,ko01100,ko01130,ko01230,map00260,map00270,map00450,map01100,map01130,map01230	M00338	R00782,R01001,R02408,R04770,R04930,R09366
1	143	Over	TRINITY_DN83944_c0_g1_i1	2129	TRINITY_DN83944_c0_g1_i1.p1	517	5prime_partial	44.2	56.7347	-5.46757	0.691901	-7.90224	2.73929e-15	2.20171e-12	28	0.4	6.6	0.5	Golgi apparatus	Signal peptide							136037.KDR10839	4.64e-283	785	KOG4735@1|root,KOG4735@2759|Eukaryota,39W9H@33154|Opisthokonta,3BKJ2@33208|Metazoa,3CZ1J@33213|Bilateria,4225G@6656|Arthropoda	33208|Metazoa	S	Glycosyltransferase family 92	Glyco_transf_92	-	-	-	ko:K02519	K02519	infB	translation initiation factor IF-2	0	0	0	0	0	-	-	-
1	144	Over	TRINITY_DN8460_c0_g1_i7	4167	TRINITY_DN8460_c0_g1_i7.p1	596	complete	7	89.3551	-2.81387	0.709565	-3.96562	7.32055e-05	0.00462778	19.2	1.9	11.1	1.5	Cell membrane								136037.KDR13013	7.58e-295	820	COG1626@1|root,KOG0602@2759|Eukaryota,38CKH@33154|Opisthokonta,3BBMJ@33208|Metazoa,3CRSP@33213|Bilateria,41Y3T@6656|Arthropoda,3SFVC@50557|Insecta	33208|Metazoa	G	Alpha,alpha-trehalase activity. It is involved in the biological process described with trehalose metabolic process	Trehalase	TREH	GO:0003674,GO:0003824,GO:0004553,GO:0004555,GO:0005575,GO:0005623,GO:0005886,GO:0005903,GO:0005975,GO:0005984,GO:0005991,GO:0005993,GO:0007275,GO:0008150,GO:0008152,GO:0009056,GO:0009311,GO:0009313,GO:0009653,GO:0009887,GO:0009987,GO:0015927,GO:0016020,GO:0016052,GO:0016787,GO:0016798,GO:0019827,GO:0031224,GO:0031225,GO:0031226,GO:0032501,GO:0032502,GO:0044237,GO:0044238,GO:0044248,GO:0044262,GO:…	3.2.1.28	ko:K01194	K01194	TREH	alpha,alpha-trehalase [EC:3.2.1.28]	0	0	0	0	0	ko00500,ko01100,map00500,map01100	-	R00010
1	145	Over	TRINITY_DN85_c0_g4_i1	1530	TRINITY_DN85_c0_g4_i1.p1	173	5prime_partial	2.1	99.6977	-1.04781	0.31199	-3.35849	0.000783696	0.0263223	48.9	16.6	13.2	4.8	Cytoplasm								7070.TC006444-PA	5.69e-55	188	COG2124@1|root,KOG0158@2759|Eukaryota,38BTY@33154|Opisthokonta,3BF8S@33208|Metazoa,3CV2F@33213|Bilateria,41YIV@6656|Arthropoda,3SZ1M@50557|Insecta	33208|Metazoa	Q	heme binding. It is involved in the biological process described with oxidation-reduction process	p450	-	GO:0003674,GO:0003824,GO:0008150,GO:0008152,GO:0016491,GO:0055114	-	ko:K14999,ko:K15003	K14999	CYP6	cytochrome P450 family 6 [EC:1.14.-.-]	K15003	CYP9	cytochrome P450 family 9 [EC:1.14.-.-]	0	0	-	-	-
1	146	Over	TRINITY_DN85219_c0_g1_i1	656	TRINITY_DN85219_c0_g1_i1.p1	155	5prime_partial	18.3	5.35173	-4.19076	1.13282	-3.69939	0.000216117	0.0101751	10	0.4	3.6	0.5	Extracellular	Signal peptide							132113.XP_003494928.1	8.32e-31	114	2C9WU@1|root,2S21C@2759|Eukaryota	2759|Eukaryota	S	structural constituent of chitin-based larval cuticle	Chitin_bind_4	-	-	-	-	0	0	0	0	0	0	0	0	-	-	-
1	147	Over	TRINITY_DN8606_c0_g1_i2	1484	TRINITY_DN8606_c0_g1_i2.p1	431	complete	7.7	21.1876	-2.94544	0.877635	-3.35611	0.000790475	0.0264334	14	1.3	12.4	1.3	Extracellular	Signal peptide							136037.KDR23755	1.12e-227	637	COG3325@1|root,KOG2806@2759|Eukaryota,38BJK@33154|Opisthokonta,3BJMN@33208|Metazoa,3CTP2@33213|Bilateria,41UBD@6656|Arthropoda,3SHXR@50557|Insecta	33208|Metazoa	G	Belongs to the glycosyl hydrolase 18 family	CBM_14,Glyco_hydro_18	Cht5	GO:0003674,GO:0003824,GO:0004553,GO:0004568,GO:0005488,GO:0005575,GO:0005576,GO:0005615,GO:0005622,GO:0005623,GO:0005737,GO:0006022,GO:0006026,GO:0006030,GO:0006032,GO:0006040,GO:0006807,GO:0006950,GO:0007275,GO:0007591,GO:0008061,GO:0008144,GO:0008150,GO:0008152,GO:0009056,GO:0009057,GO:0009611,GO:0009987,GO:0016787,GO:0016798,GO:0017144,GO:0018990,GO:0022404,GO:0032501,GO:0032502,GO:0040003,GO:…	3.2.1.14	ko:K01183	K01183	E3.2.1.14	chitinase [EC:3.2.1.14]	0	0	0	0	0	ko00520,ko01100,map00520,map01100	-	R01206,R02334
1	148	Over	TRINITY_DN8759_c0_g1_i1	1892	TRINITY_DN8759_c0_g1_i1.p1	551	complete	2.3	163.647	-1.22068	0.325459	-3.75063	0.000176393	0.00882162	65.9	19.6	20	3.9	Cell membrane								136037.KDR24034	9.71e-273	761	COG1785@1|root,KOG4126@2759|Eukaryota,38GD6@33154|Opisthokonta,3B9Y3@33208|Metazoa,3CRTE@33213|Bilateria,41W4I@6656|Arthropoda,3SIN7@50557|Insecta	33208|Metazoa	G	Phosphatase activity. It is involved in the biological process described with metabolic process	Alk_phosphatase	-	GO:0000003,GO:0003674,GO:0003824,GO:0004035,GO:0005575,GO:0005576,GO:0005615,GO:0005623,GO:0006793,GO:0006796,GO:0006810,GO:0007275,GO:0007399,GO:0008150,GO:0008152,GO:0009986,GO:0009987,GO:0016311,GO:0016787,GO:0016788,GO:0016791,GO:0032501,GO:0032502,GO:0032504,GO:0042044,GO:0042045,GO:0042578,GO:0044237,GO:0044421,GO:0044464,GO:0048731,GO:0048856,GO:0051179,GO:0051234,GO:0070633	3.1.3.1	ko:K01077	K01077	E3.1.3.1	alkaline phosphatase [EC:3.1.3.1]	0	0	0	0	0	ko00730,ko00790,ko01100,ko02020,map00730,map00790,map01100,map02020	M00126	R02135,R04620
1	149	Over	TRINITY_DN876_c0_g1_i2	6035	TRINITY_DN876_c0_g1_i2.p1	439	complete	247.6	25.2829	-7.95212	1.92041	-4.14085	3.46018e-05	0.00256156	4.4	0	3.6	0	Cytoplasm								136037.KDR18917	0	844	KOG3746@1|root,KOG3746@2759|Eukaryota,38DSC@33154|Opisthokonta,3BB0T@33208|Metazoa,3CTXI@33213|Bilateria,41TGM@6656|Arthropoda,3SFY6@50557|Insecta	33208|Metazoa	S	It is involved in the biological process described with regulation of response to reactive oxygen species	PA26	SESN1	GO:0000002,GO:0000422,GO:0001101,GO:0001558,GO:0001650,GO:0001932,GO:0003674,GO:0003824,GO:0005092,GO:0005488,GO:0005575,GO:0005622,GO:0005623,GO:0005634,GO:0005730,GO:0005737,GO:0005829,GO:0006082,GO:0006109,GO:0006111,GO:0006139,GO:0006259,GO:0006355,GO:0006357,GO:0006417,GO:0006629,GO:0006631,GO:0006635,GO:0006725,GO:0006807,GO:0006810,GO:0006914,GO:0006950,GO:0006974,GO:0006979,GO:0006996,GO:…	-	ko:K10141,ko:K20394	K10141	SESN1_3	sestrin 1/3	K20394	SESN2	sestrin 2	0	0	ko04115,ko04150,ko04211,map04115,map04150,map04211	-	-
1	150	Over	TRINITY_DN876_c0_g1_i4	6071	TRINITY_DN876_c0_g1_i4.p1	439	complete	183.7	18.7445	-7.52135	1.94999	-3.85712	0.000114731	0.00649204	3.3	0	3.7	0	Cytoplasm								136037.KDR18917	0	844	KOG3746@1|root,KOG3746@2759|Eukaryota,38DSC@33154|Opisthokonta,3BB0T@33208|Metazoa,3CTXI@33213|Bilateria,41TGM@6656|Arthropoda,3SFY6@50557|Insecta	33208|Metazoa	S	It is involved in the biological process described with regulation of response to reactive oxygen species	PA26	SESN1	GO:0000002,GO:0000422,GO:0001101,GO:0001558,GO:0001650,GO:0001932,GO:0003674,GO:0003824,GO:0005092,GO:0005488,GO:0005575,GO:0005622,GO:0005623,GO:0005634,GO:0005730,GO:0005737,GO:0005829,GO:0006082,GO:0006109,GO:0006111,GO:0006139,GO:0006259,GO:0006355,GO:0006357,GO:0006417,GO:0006629,GO:0006631,GO:0006635,GO:0006725,GO:0006807,GO:0006810,GO:0006914,GO:0006950,GO:0006974,GO:0006979,GO:0006996,GO:…	-	ko:K10141,ko:K20394	K10141	SESN1_3	sestrin 1/3	K20394	SESN2	sestrin 2	0	0	ko04115,ko04150,ko04211,map04115,map04150,map04211	-	-
1	151	Over	TRINITY_DN89_c1_g2_i6	6103	TRINITY_DN89_c1_g2_i6.p1	1258	complete	2.4	26.8739	-1.24248	0.330132	-3.7636	0.000167485	0.0084893	3.2	0.9	0.3	0.2	Cell membrane	Transmembrane domain							136037.KDR07663	0	2189	COG0474@1|root,KOG0204@2759|Eukaryota,38BS0@33154|Opisthokonta,3B93Y@33208|Metazoa,3CUIU@33213|Bilateria,41WQG@6656|Arthropoda,3SK29@50557|Insecta	33208|Metazoa	P	This magnesium-dependent enzyme catalyzes the hydrolysis of ATP coupled with the transport of calcium	ATP_Ca_trans_C,Cation_ATPase,Cation_ATPase_C,Cation_ATPase_N,E1-E2_ATPase,Hydrolase,Hydrolase_3	PMCA	GO:0002119,GO:0002164,GO:0003674,GO:0003824,GO:0005215,GO:0005388,GO:0005575,GO:0005622,GO:0005623,GO:0005886,GO:0005887,GO:0006810,GO:0006811,GO:0006812,GO:0006816,GO:0006873,GO:0006874,GO:0006875,GO:0006897,GO:0007275,GO:0008150,GO:0008324,GO:0009790,GO:0009791,GO:0009792,GO:0009987,GO:0015075,GO:0015085,GO:0015318,GO:0015399,GO:0015405,GO:0015662,GO:0016020,GO:0016021,GO:0016192,GO:0016462,GO:…	3.6.3.8	ko:K01537,ko:K05850	K01537	ATP2C	P-type Ca2+ transporter type 2C [EC:7.2.2.10]	K05850	ATP2B	P-type Ca2+ transporter type 2B [EC:7.2.2.10]	0	0	ko04020,ko04022,ko04024,ko04261,ko04925,ko04970,ko04972,map04020,map04022,map04024,map04261,map04925,map04970,map04972	-	-
1	152	Over	TRINITY_DN9147_c0_g1_i1	1538	TRINITY_DN9147_c0_g1_i1.p1	399	complete	6.2	186.511	-2.63478	0.81127	-3.24772	0.00116332	0.0350008	116.3	13.6	68.9	11.7	Extracellular	Signal peptide							136037.KDR09404	2.39e-91	288	COG4826@1|root,KOG2392@2759|Eukaryota,3A53Y@33154|Opisthokonta,3BRYZ@33208|Metazoa,3D970@33213|Bilateria,4200S@6656|Arthropoda,3SNIV@50557|Insecta	33208|Metazoa	V	Belongs to the serpin family	Serpin	SRPN17	-	-	ko:K13963	K13963	SERPINB	serpin B	0	0	0	0	0	ko05146,map05146	-	-
1	153	Over	TRINITY_DN923_c2_g3_i1	1879	TRINITY_DN923_c2_g3_i1.p1	205	complete	24.3	18.3509	-4.60015	1.07669	-4.27251	1.93288e-05	0.00154803	10.3	0.3	5.1	0.6	Cytoplasm|Nucleus	Nuclear export signal							28377.ENSACAP00000014197	6.51e-104	305	COG0274@1|root,KOG3981@2759|Eukaryota,38FG8@33154|Opisthokonta,3BFYA@33208|Metazoa,3CXMC@33213|Bilateria,482D0@7711|Chordata,48Z27@7742|Vertebrata	33208|Metazoa	F	deoxyribose-phosphate aldolase	DeoC	DERA	GO:0001775,GO:0002252,GO:0002263,GO:0002274,GO:0002275,GO:0002283,GO:0002366,GO:0002376,GO:0002443,GO:0002444,GO:0002446,GO:0003674,GO:0003824,GO:0004139,GO:0005575,GO:0005576,GO:0005622,GO:0005623,GO:0005634,GO:0005737,GO:0005829,GO:0005975,GO:0006081,GO:0006098,GO:0006139,GO:0006725,GO:0006732,GO:0006733,GO:0006739,GO:0006753,GO:0006793,GO:0006796,GO:0006807,GO:0006810,GO:0006887,GO:0006955,GO:…	4.1.2.4	ko:K01619	K01619	deoC	deoxyribose-phosphate aldolase [EC:4.1.2.4]	0	0	0	0	0	ko00030,map00030	-	R01066
1	154	Over	TRINITY_DN933_c0_g1_i3	5518	TRINITY_DN933_c0_g1_i3.p1	1457	5prime_partial	196.6	33.2712	-7.61932	1.21581	-6.26686	3.68402e-10	1.10545e-07	6.1	0	3.4	0	Cytoplasm	Nuclear export signal							136037.KDR09737	0	1295	COG2453@1|root,KOG1716@2759|Eukaryota,38B5R@33154|Opisthokonta,3BAJW@33208|Metazoa,3CY7K@33213|Bilateria,41WFH@6656|Arthropoda,3SH8R@50557|Insecta	33208|Metazoa	V	phosphatase activity. It is involved in the biological process described with protein dephosphorylation	DEK_C,DSPc	SSH3	GO:0000278,GO:0000902,GO:0000904,GO:0001654,GO:0003674,GO:0003779,GO:0003824,GO:0004721,GO:0005488,GO:0005515,GO:0005575,GO:0005622,GO:0005623,GO:0005737,GO:0005829,GO:0005856,GO:0005886,GO:0006464,GO:0006470,GO:0006793,GO:0006796,GO:0006807,GO:0006810,GO:0006996,GO:0007010,GO:0007049,GO:0007097,GO:0007154,GO:0007267,GO:0007268,GO:0007275,GO:0007399,GO:0007409,GO:0007417,GO:0007420,GO:0007423,GO:…	3.1.3.16,3.1.3.48	ko:K05766	K05766	SSH	protein phosphatase slingshot [EC:3.1.3.16 3.1.3.48]	0	0	0	0	0	ko04360,ko04810,map04360,map04810	-	-
1	155	Over	TRINITY_DN9396_c3_g1_i1	2511	TRINITY_DN9396_c3_g1_i1.p1	460	complete	7.2	35.9807	-2.84236	0.512547	-5.54557	2.92999e-08	5.63584e-06	13.3	1.3	3.8	0.6	Endoplasmic reticulum	Transmembrane domain							136037.KDR18720	4.5e-113	353	28J00@1|root,2QRBT@2759|Eukaryota,39VG5@33154|Opisthokonta,3BDC1@33208|Metazoa,3CWS8@33213|Bilateria,41UPV@6656|Arthropoda,3SKN5@50557|Insecta	33208|Metazoa	S	brambleberry-like	-	-	GO:0000003,GO:0000278,GO:0000741,GO:0006996,GO:0006997,GO:0006998,GO:0007049,GO:0007084,GO:0007338,GO:0007344,GO:0008150,GO:0009566,GO:0009987,GO:0010256,GO:0016043,GO:0019953,GO:0022402,GO:0022414,GO:0031468,GO:0044703,GO:0048284,GO:0051704,GO:0061024,GO:0061025,GO:0061472,GO:0071840,GO:0090174,GO:1903047	-	-	0	0	0	0	0	0	0	0	-	-	-
1	156	Over	TRINITY_DN9597_c0_g1_i1	3622	TRINITY_DN9597_c0_g1_i1.p1	850	complete	2.7	98.1584	-1.45134	0.288363	-5.03304	4.82772e-07	6.92025e-05	20.7	5.4	0.3	2.5	Cytoplasm	Nuclear localization signal							136037.KDR13784	2.17e-294	837	KOG3528@1|root,KOG3528@2759|Eukaryota,39W4Y@33154|Opisthokonta,3BKEK@33208|Metazoa,3E46D@33213|Bilateria,42A9A@6656|Arthropoda,3SZR8@50557|Insecta	33208|Metazoa	S	Domain present in PSD-95, Dlg, and ZO-1/2.	PDZ	IL16	-	-	-	0	0	0	0	0	0	0	0	-	-	-
1	157	Over	TRINITY_DN961_c0_g1_i21	3528	TRINITY_DN961_c0_g1_i21.p1	251	complete	2	95.8912	-1.03559	0.294379	-3.51788	0.000435003	0.0170553	18.9	6.5	4.4	1.4	Cytoplasm|Nucleus	Nuclear export signal							136037.KDR13273	1.49e-101	301	KOG4006@1|root,KOG4006@2759|Eukaryota,39RXN@33154|Opisthokonta,3BJ0Q@33208|Metazoa,3CTZT@33213|Bilateria,4202J@6656|Arthropoda,3SN8E@50557|Insecta	33208|Metazoa	T	BTG family	BTG	BTG4	GO:0005575,GO:0005622,GO:0005623,GO:0005737,GO:0006950,GO:0006979,GO:0007049,GO:0007050,GO:0007275,GO:0007346,GO:0007399,GO:0008150,GO:0008285,GO:0009987,GO:0022008,GO:0022402,GO:0030154,GO:0030182,GO:0032501,GO:0032502,GO:0042127,GO:0044424,GO:0044464,GO:0045786,GO:0045930,GO:0048519,GO:0048523,GO:0048699,GO:0048731,GO:0048856,GO:0048869,GO:0050789,GO:0050794,GO:0050896,GO:0051726,GO:0065007	-	ko:K14443	K14443	TOB	protein Tob/BTG	0	0	0	0	0	ko03018,map03018	-	-
1	158	Over	TRINITY_DN988_c2_g3_i1	2563	TRINITY_DN988_c2_g3_i1.p1	536	complete	2.4	37.8497	-1.25259	0.317747	-3.94209	8.07739e-05	0.0050355	11.1	3.3	2.3	0.7	Cytoplasm								136037.KDR17892	5.19e-269	750	COG1109@1|root,KOG2537@2759|Eukaryota,38CHB@33154|Opisthokonta,3BFTW@33208|Metazoa,3CRUW@33213|Bilateria,41WXK@6656|Arthropoda,3SHHS@50557|Insecta	33208|Metazoa	G	Catalyzes the conversion of GlcNAc-6-P into GlcNAc-1-P during the synthesis of uridine diphosphate UDP-GlcNAc, a sugar nucleotide critical to multiple glycosylation pathways including protein N- and O-glycosylation	PGM_PMM_I,PGM_PMM_III,PGM_PMM_IV	PGM3	GO:0000003,GO:0001704,GO:0001707,GO:0002376,GO:0002520,GO:0003674,GO:0003824,GO:0004610,GO:0004614,GO:0005575,GO:0005622,GO:0005623,GO:0005737,GO:0005829,GO:0006040,GO:0006041,GO:0006047,GO:0006048,GO:0006139,GO:0006464,GO:0006486,GO:0006487,GO:0006493,GO:0006725,GO:0006793,GO:0006796,GO:0006807,GO:0007275,GO:0007276,GO:0007283,GO:0007369,GO:0007498,GO:0008150,GO:0008152,GO:0009058,GO:0009059,GO:…	5.4.2.3	ko:K01836	K01836	PGM3	phosphoacetylglucosamine mutase [EC:5.4.2.3]	0	0	0	0	0	ko00520,ko01100,ko01130,map00520,map01100,map01130	-	R08193
1	159	Over	TRINITY_DN99_c1_g1_i3	3075	TRINITY_DN99_c1_g1_i3.p1	991	3prime_partial	3	61.1053	-1.59141	0.418306	-3.80441	0.000142145	0.00745683	15.7	3.6	4.1	1.6	Cytoplasm	Nuclear localization signal							136037.KDR20107	0	1695	KOG3632@1|root,KOG3632@2759|Eukaryota,38CCB@33154|Opisthokonta,3BEY5@33208|Metazoa,3CSJI@33213|Bilateria,41UX5@6656|Arthropoda,3SIK2@50557|Insecta	33208|Metazoa	T	Src homology 3 domains	SH3_2,SH3_9	BZRAP1	GO:0003674,GO:0005102,GO:0005488,GO:0005515,GO:0005575,GO:0005622,GO:0005623,GO:0005737,GO:0005739,GO:0005829,GO:0005856,GO:0005938,GO:0006629,GO:0006694,GO:0006700,GO:0006996,GO:0007010,GO:0007154,GO:0007267,GO:0007268,GO:0007274,GO:0008150,GO:0008152,GO:0008202,GO:0008207,GO:0008610,GO:0009058,GO:0009892,GO:0009987,GO:0010563,GO:0010817,GO:0010921,GO:0010923,GO:0016043,GO:0019220,GO:0019222,GO:…	-	ko:K17591,ko:K19922	K17591	RIMBP2	RIMS-binding protein 2	K19922	TSPOAP1	peripheral-type benzodiazepine receptor-associated protein 1	0	0	-	-	-
1	160	Over	TRINITY_DN9980_c0_g1_i1	2008	TRINITY_DN9980_c0_g1_i1.p1	602	complete	12.3	29.7356	-3.62281	1.08339	-3.34396	0.000825913	0.0271984	15.1	0.8	11.9	0.8	Endoplasmic reticulum	Signal peptide|Transmembrane domain							136037.KDR13406	0	960	COG2124@1|root,KOG0158@2759|Eukaryota,38BTY@33154|Opisthokonta,3BF8S@33208|Metazoa,3CV2F@33213|Bilateria,41VYX@6656|Arthropoda,3SK5P@50557|Insecta	33208|Metazoa	Q	cytochrome p450	p450	-	-	-	ko:K14999,ko:K15003	K14999	CYP6	cytochrome P450 family 6 [EC:1.14.-.-]	K15003	CYP9	cytochrome P450 family 9 [EC:1.14.-.-]	0	0	-	-	-
2	161	Over	TRINITY_DN10495_c0_g1_i8	837	TRINITY_DN10495_c0_g1_i8.p1	96	complete	3.2	17.533	-1.6729	0.490279	-3.41214	0.000644549	0.0228794	19.7	4.4	4.3	2.8	Cytoplasm		hypothetical protein C0J52_07327 [Blattella germanica]		67	PSN57418.1	91.045	67
2	162	Over	TRINITY_DN1171_c1_g1_i8	2214	TRINITY_DN1171_c1_g1_i8.p1	61	complete	4.7	15.6451	-2.22997	0.664628	-3.35522	0.000793032	0.0264529	6.2	0.9	2.8	0.6	Cytoplasm|Nucleus		hypothetical protein C0J52_01110 [Blattella germanica]		61	PSN52983.1	100	61
2	163	Over	TRINITY_DN12744_c1_g1_i1	1225	TRINITY_DN12744_c1_g1_i1.p1	89	5prime_partial	8.5	18.345	-3.07917	0.669617	-4.59841	4.2572e-06	0.000454068	15	1.3	7.1	0.6	Cytoplasm|Nucleus		hypothetical protein C0J52_18607 [Blattella germanica]		59	PSN46309.1	74.359	39
2	164	Over	TRINITY_DN1419_c2_g1_i8	1317	TRINITY_DN1419_c2_g1_i8.p1	96	complete	11.2	269.795	-3.48342	0.908703	-3.8334	0.000126383	0.00682076	209	12.8	105.2	13.8	Nucleus	Nuclear localization signal	hypothetical protein C0J52_06574 [Blattella germanica]		149	PSN47374.1	88.764	89
2	165	Over	TRINITY_DN14404_c0_g1_i1	1575	TRINITY_DN14404_c0_g1_i1.p1	283	complete	14.7	25.9468	-3.87939	0.825383	-4.70011	2.60026e-06	0.000298565	17	0.8	12.9	0.7	Extracellular	Signal peptide	hypothetical protein C0J52_04153 [Blattella germanica]		283	PSN55034.1	100	283
2	166	Over	TRINITY_DN17191_c0_g1_i1	2316	TRINITY_DN17191_c0_g1_i1.p1	572	complete	3.8	16.9832	-1.93242	0.572174	-3.37734	0.000731915	0.0249951	6.2	1.1	1.5	0.5	Cell membrane	Transmembrane domain	hypothetical protein C0J52_20806 [Blattella germanica]	PFAM:PF00083	1455	PSN31575.1	79.371	572
2	167	Over	TRINITY_DN1771_c0_g1_i5	1251	TRINITY_DN1771_c0_g1_i5.p1	77	complete	2.1	251.17	-1.04594	0.306762	-3.40961	0.000650549	0.0230153	153.8	54.6	10.7	30.1	Cytoplasm|Nucleus	Nuclear localization signal	hypothetical protein C0J52_24295 [Blattella germanica]		98	PSN33177.1	88.235	51
2	168	Over	TRINITY_DN1951_c0_g3_i1	921	TRINITY_DN1951_c0_g3_i1.p1	230	5prime_partial	6.5	51.2839	-2.70102	0.850805	-3.17466	0.00150011	0.0424121	57.1	6.3	50.5	5.3	Extracellular	Signal peptide	hypothetical protein C0J52_05180 [Blattella germanica]	PFAM:PF00059	203	PSN48765.1	71.111	225
2	169	Over	TRINITY_DN2255_c0_g1_i2	2678	TRINITY_DN2255_c0_g1_i2.p1	75	complete	231.5	23.6675	-7.85489	1.40141	-5.605	2.08259e-08	4.18471e-06	9.2	0	7.1	0	Cytoplasm	Peroxisomal targeting signal	uncharacterized protein LOC118437132 [Folsomia candida]		356	XP_035711828.1	50	66
2	170	Over	TRINITY_DN239_c1_g1_i1	3884	TRINITY_DN239_c1_g1_i1.p1	299	complete	4.7	506.522	-2.22196	0.708457	-3.13634	0.0017107	0.0468932	110.2	18.8	26.1	19.1	Nucleus	Nuclear export signal	uncharacterized protein LOC113004029 [Solenopsis invicta]		1137	XP_039303960.1	24.834	302
2	171	Over	TRINITY_DN252_c0_g2_i5	900	TRINITY_DN252_c0_g2_i5.p2	102	complete	2.5	68.9431	-1.30391	0.376972	-3.4589	0.000542385	0.0199125	65.2	18.1	17.6	3.7	Cytoplasm|Nucleus	Nuclear export signal	hypothetical protein C0J52_03998 [Blattella germanica]		229	PSN45056.1	89.623	106
2	172	Over	TRINITY_DN2750_c1_g1_i1	2474	TRINITY_DN2750_c1_g1_i1.p1	505	complete	21.8	19.3454	-4.44366	1.04045	-4.27089	1.94697e-05	0.00155107	8	0.3	5.4	0.4	Cell membrane|Lysosome/Vacuole	Signal peptide|Transmembrane domain	hypothetical protein C0J52_03412 [Blattella germanica]	PFAM:PF14828	473	PSN48330.1	93.131	495
2	173	Over	TRINITY_DN3049_c0_g1_i1	897	TRINITY_DN3049_c0_g1_i1.p1	191	complete	2.9	340.482	-1.52562	0.413072	-3.69335	0.00022132	0.0102909	339.8	86.2	136.1	44.7	Extracellular	Signal peptide	hypothetical protein C0J52_03363 [Blattella germanica]	lipocalin/cytosolic fatty acid-binding protein family (31-174)	192	PSN47917.1	98.953	191
2	174	Over	TRINITY_DN3173_c0_g4_i7	1449	TRINITY_DN3173_c0_g4_i7.p1	100	complete	3.8	18.383	-1.9421	0.608448	-3.19189	0.00141346	0.0404907	11.4	2	5.8	0.8	Cytoplasm|Nucleus	Nuclear localization signal	hypothetical protein C0J52_11554 [Blattella germanica]		100	PSN58326.1	81	100
2	175	Over	TRINITY_DN3246_c1_g1_i1	662	TRINITY_DN3246_c1_g1_i1.p1	94	complete	2.6	25.0621	-1.39939	0.41052	-3.40881	0.000652466	0.0230153	36.2	9.8	4.8	5.6	Cytoplasm		hypothetical protein C0J52_14935 [Blattella germanica]		77	PSN49907.1	70.13	77
2	176	Over	TRINITY_DN37215_c0_g1_i1	1025	TRINITY_DN37215_c0_g1_i1.p1	145	complete	12	6.83684	-3.58494	0.95349	-3.7598	0.000170047	0.00856131	7.2	0.4	3.1	0.3	Extracellular	Signal peptide	hypothetical protein C0J52_04097 [Blattella germanica]		144	PSN53352.1	99.306	144
2	177	Over	TRINITY_DN4612_c1_g2_i4	603	TRINITY_DN4612_c1_g2_i4.p1	65	complete	21.7	16.6107	-4.44148	1.25105	-3.5502	0.000384939	0.0155252	34.9	1.2	24.1	1.4	Cytoplasm|Nucleus	Nuclear localization signal	hypothetical protein C0J52_12637, partial [Blattella germanica]		103	PSN37571.1	91.304	46
2	178	Over	TRINITY_DN4690_c0_g1_i8	2046	TRINITY_DN4690_c0_g1_i8.p1	115	complete	69.6	7.11013	-6.1206	1.85025	-3.30798	0.000939723	0.0299553	3.8	0	2.8	0	Cytoplasm		hypothetical protein C0J52_07017 [Blattella germanica]		99	PSN48783.1	88.889	54
2	179	Over	TRINITY_DN61990_c0_g1_i1	1252	TRINITY_DN61990_c0_g1_i1.p1	408	5prime_partial	29	9.8672	-4.85608	1.42153	-3.4161	0.000635253	0.0226151	8.6	0.2	8.7	0.4	Cell membrane	Signal peptide|Transmembrane domain	hypothetical protein C0J52_07899 [Blattella germanica]	PFAM:PF02931 extracellular domain (ECD) of Cys-loop neurotransmitter-gated ion channels	1379	PSN38810.1	100	395
2	180	Over	TRINITY_DN641_c0_g1_i1	2743	TRINITY_DN641_c0_g1_i1.p1	598	5prime_partial	120.3	12.3091	-6.91059	1.42847	-4.83777	1.31307e-06	0.000166014	4.7	0	3.7	0	Extracellular	Signal peptide	hypothetical protein C0J52_03060 [Blattella germanica]	High molecular weight glutenin subunit	505	PSN48279.1	96.693	514
2	181	Over	TRINITY_DN728_c0_g1_i1	3905	TRINITY_DN728_c0_g1_i1.p1	368	complete	882.1	90.1116	-9.78485	1.17384	-8.33577	7.69978e-17	9.12018e-14	23.8	0	11.5	0	Extracellular	Signal peptide	loricrin-like isoform X1 [Zootermopsis nevadensis]		358	XP_021919099.1	64	125
2	182	Over	TRINITY_DN728_c0_g1_i3	3809	TRINITY_DN728_c0_g1_i3.p1	336	complete	46.7	99.4655	-5.54569	0.547237	-10.134	3.90407e-24	1.46435e-20	26.3	0.4	3.7	0.3	Extracellular	Signal peptide	loricrin-like isoform X1 [Zootermopsis nevadensis]		358	XP_021919099.1	64	125
2	183	Over	TRINITY_DN728_c0_g1_i4	3827	TRINITY_DN728_c0_g1_i4.p1	336	complete	662.7	67.6913	-9.37216	2.05271	-4.56576	4.97683e-06	0.000520946	18	0	16.5	0	Extracellular	Signal peptide	loricrin-like isoform X1 [Zootermopsis nevadensis]		358	XP_021919099.1	64	125
2	184	Over	TRINITY_DN804_c0_g1_i1	1825	TRINITY_DN804_c0_g1_i1.p4	65	5prime_partial	2.8	184.4	-1.47982	0.252929	-5.85072	4.8946e-09	1.18444e-06	81.3	20.2	19.1	2.5	Nucleus		hypothetical protein C0J52_20723 [Blattella germanica]		55	PSN34018.1	73.684	38
2	185	Over	TRINITY_DN80542_c0_g1_i1	388	TRINITY_DN80542_c0_g1_i1.p2	80	complete	20.7	5.70848	-4.37363	1.26266	-3.46382	0.000532572	0.0197992	23.8	0.7	16.8	0.8	Extracellular	Signal peptide	uncharacterized protein LOC117282106 isoform X3 [Cryptotermes secundus]		80	XP_033606331.1	67.901	81
2	186	Over	TRINITY_DN854_c0_g1_i16	1338	TRINITY_DN854_c0_g1_i16.p1	241	complete	297.5	30.3824	-8.21652	2.05309	-4.00204	6.27997e-05	0.00418138	24.7	0	33.8	0	Cell membrane	Signal peptide|Transmembrane domain	hypothetical protein C0J52_25850 [Blattella germanica]		136	PSN41775.1	92.063	126
2	187	Over	TRINITY_DN9316_c0_g1_i8	4947	TRINITY_DN9316_c0_g1_i8.p3	203	complete	6.7	26.2961	-2.74107	0.517734	-5.29437	1.1943e-07	2.0362e-05	4.8	0.5	1.2	0.3	Cytoplasm	Nuclear localization signal	hypothetical protein C0J52_13155, partial [Blattella germanica]		344	PSN46216.1	100	203
3	188	Over	TRINITY_DN10130_c0_g3_i2	847	TRINITY_DN10130_c0_g3_i2.p1	91	5prime_partial	13.7	16.8943	-3.77926	0.913807	-4.13573	3.53829e-05	0.0026108	22.7	1.3	5.8	2.1	Nucleus
3	189	Over	TRINITY_DN10272_c0_g1_i2	795	TRINITY_DN10272_c0_g1_i2.p2	67	complete	41	10.491	-5.35842	1.29791	-4.12849	3.65146e-05	0.00266805	16	0.2	12.2	0.5	Cytoplasm|Nucleus
3	190	Over	TRINITY_DN12010_c0_g1_i6	1879	TRINITY_DN12010_c0_g1_i6.p1	67	complete	5.1	24.2336	-2.35106	0.532726	-4.41326	1.01828e-05	0.000924047	11.7	1.7	1.6	1.2	Cytoplasm|Nucleus
3	191	Over	TRINITY_DN1268_c0_g4_i1	1118	TRINITY_DN1268_c0_g4_i1.p2	60	complete	5.1	51.6899	-2.35971	0.65949	-3.57808	0.000346134	0.0142931	44.5	5.6	4	3.7	Cytoplasm|Mitochondrion	Mitochondrial transit peptide
3	192	Over	TRINITY_DN12828_c1_g1_i2	2825	TRINITY_DN12828_c1_g1_i2.p3	64	complete	63.8	19.6731	-5.99544	1.63697	-3.66252	0.000249744	0.011241	7	0.1	8.9	0.2	Cytoplasm|Nucleus	Peroxisomal targeting signal
3	193	Over	TRINITY_DN14841_c0_g1_i3	2188	TRINITY_DN14841_c0_g1_i3.p1	87	complete	3.7	43.2404	-1.88951	0.407082	-4.64161	3.45706e-06	0.000381379	16.7	3.2	3.1	1.5	Cytoplasm|Nucleus
3	194	Over	TRINITY_DN15021_c0_g1_i2	1251	TRINITY_DN15021_c0_g1_i2.p1	59	complete	4.8	10.655	-2.25317	0.620492	-3.63127	0.000282035	0.0123486	7.9	1.2	2.9	0.4	Peroxisome
3	195	Over	TRINITY_DN15844_c1_g2_i1	2379	TRINITY_DN15844_c1_g2_i1.p2	69	complete	3.3	12.9495	-1.72161	0.49261	-3.49487	0.000474298	0.0181234	4.4	0.9	1.1	0.2	Cytoplasm
3	196	Over	TRINITY_DN1737_c0_g2_i1	1068	TRINITY_DN1737_c0_g2_i1.p2	89	complete	2.7	47.0338	-1.41765	0.29901	-4.74113	2.12528e-06	0.00024782	37.3	9.8	4.1	2.7	Nucleus
3	197	Over	TRINITY_DN19390_c2_g2_i1	2676	TRINITY_DN19390_c2_g2_i1.p1	127	complete	2.4	52.479	-1.25613	0.316504	-3.96877	7.22454e-05	0.00459289	14.7	4.3	1.7	1.5	Mitochondrion
3	198	Over	TRINITY_DN2097_c0_g1_i1	752	TRINITY_DN2097_c0_g1_i1.p2	61	complete	9.5	7.17375	-3.25024	0.938418	-3.46353	0.00053314	0.0197992	10.6	0.8	5.3	0.6	Extracellular
3	199	Over	TRINITY_DN2172_c1_g1_i1	4480	TRINITY_DN2172_c1_g1_i1.p3	66	complete	2.1	133.256	-1.03761	0.250228	-4.14665	3.37374e-05	0.00252246	20.6	7.2	1.6	2.8	Cytoplasm
3	200	Over	TRINITY_DN22388_c0_g6_i1	1659	TRINITY_DN22388_c0_g6_i1.p1	85	5prime_partial	7.6	16.2691	-2.93169	0.705554	-4.15515	3.25067e-05	0.00243855	9.6	0.9	3.8	0.6	Nucleus
3	201	Over	TRINITY_DN2424_c0_g4_i2	2175	TRINITY_DN2424_c0_g4_i2.p1	107	complete	2.3	37.7958	-1.23265	0.34234	-3.60065	0.00031742	0.0132533	13.1	3.9	1.3	1.7	Cytoplasm
3	202	Over	TRINITY_DN29717_c0_g1_i1	792	TRINITY_DN29717_c0_g1_i1.p2	65	5prime_partial	28.3	12.3672	-4.82492	1.01524	-4.7525	2.00922e-06	0.00023674	18.5	0.5	6.4	0.7	Cytoplasm
3	203	Over	TRINITY_DN3109_c0_g1_i12	2467	TRINITY_DN3109_c0_g1_i12.p1	74	complete	20.5	8.69754	-4.35992	1.07921	-4.03992	5.34696e-05	0.00363545	3.6	0.1	1.4	0.2	Cytoplasm	Nuclear localization signal
3	204	Over	TRINITY_DN3727_c0_g3_i2	1955	TRINITY_DN3727_c0_g3_i2.p1	109	complete	2.9	15.7401	-1.51579	0.46012	-3.29434	0.000986516	0.0310959	6.5	1.6	1.2	0.8	Mitochondrion
3	205	Over	TRINITY_DN3828_c2_g3_i1	1366	TRINITY_DN3828_c2_g3_i1.p1	128	3prime_partial	3.9	168.169	-1.96844	0.494768	-3.97852	6.93464e-05	0.00447175	108.1	20.1	56.4	7.7	Cytoplasm|Nucleus|Mitochondrion
3	206	Over	TRINITY_DN398_c0_g1_i11	1593	TRINITY_DN398_c0_g1_i11.p1	76	complete	3.5	41.0912	-1.8137	0.378084	-4.79708	1.60997e-06	0.000199078	22.1	4.4	4.2	1.9	Cytoplasm
3	207	Over	TRINITY_DN50720_c0_g1_i1	570	TRINITY_DN50720_c0_g1_i1.p3	102	5prime_partial	52.1	5.29129	-5.70306	1.234	-4.62159	3.80813e-06	0.000413396	12.9	0	5.5	0	Cytoplasm
3	208	Over	TRINITY_DN560_c1_g1_i4	2247	TRINITY_DN560_c1_g1_i4.p2	65	complete	4.1	55.7499	-2.04588	0.536022	-3.81679	0.000135198	0.00715915	21.1	3.6	10.5	1.4	Cytoplasm
3	209	Over	TRINITY_DN5778_c0_g1_i1	1088	TRINITY_DN5778_c0_g1_i1.p1	186	complete	4.8	144.708	-2.27409	0.504976	-4.50337	6.68847e-06	0.00065731	127.6	20.1	25.2	17.7	Nucleus
3	210	Over	TRINITY_DN58_c2_g1_i1	1431	TRINITY_DN58_c2_g1_i1.p1	112	complete	8.6	20.3981	-3.09961	0.649147	-4.77489	1.79805e-06	0.00021524	14.2	1.1	6	0.8	Cytoplasm|Nucleus
3	211	Over	TRINITY_DN5974_c1_g4_i1	919	TRINITY_DN5974_c1_g4_i1.p1	69	complete	14.7	6.37361	-3.87996	1.00763	-3.85058	0.000117836	0.00654792	7.7	0.4	2.5	0.3	Cytoplasm|Nucleus
3	212	Over	TRINITY_DN59982_c0_g1_i1	1149	TRINITY_DN59982_c0_g1_i1.p1	82	complete	3.3	15.1223	-1.70662	0.54047	-3.15766	0.00159043	0.044243	11.9	2.6	3.3	2	Endoplasmic reticulum	Nuclear localization signal
3	213	Over	TRINITY_DN6217_c0_g1_i2	971	TRINITY_DN6217_c0_g1_i2.p1	79	5prime_partial	13.9	12.0491	-3.79922	1.02483	-3.70716	0.000209596	0.00997243	14	0.7	10.1	0.8	Extracellular
3	214	Over	TRINITY_DN63629_c0_g1_i1	1447	TRINITY_DN63629_c0_g1_i1.p3	59	complete	5.3	6.94864	-2.41099	0.696043	-3.46386	0.000532488	0.0197992	4.4	0.6	0.8	0.1	Cytoplasm|Nucleus
3	215	Over	TRINITY_DN75_c0_g1_i1	2153	TRINITY_DN75_c0_g1_i1.p1	70	complete	2.5	172.212	-1.33263	0.27528	-4.84098	1.29202e-06	0.000164277	61.3	17.7	6.2	8.1	Cytoplasm
3	216	Over	TRINITY_DN755_c0_g2_i4	2823	TRINITY_DN755_c0_g2_i4.p1	100	complete	2.5	41.9785	-1.34173	0.295836	-4.53538	5.7499e-06	0.000582889	11.2	3.1	1.4	0.8	Cytoplasm	Nuclear localization signal
3	217	Over	TRINITY_DN7689_c2_g1_i1	2614	TRINITY_DN7689_c2_g1_i1.p1	558	complete	156.9	16.0248	-7.29411	2.03682	-3.58112	0.000342119	0.0142055	6.5	0	7	0	Cytoplasm	Nuclear export signal
3	218	Over	TRINITY_DN77_c0_g1_i1	3812	TRINITY_DN77_c0_g1_i1.p1	60	complete	249.3	361.326	-7.9616	0.69867	-11.3954	4.40957e-30	1.98475e-26	97.8	0.3	51.6	0.1	Mitochondrion
3	219	Over	TRINITY_DN7790_c0_g1_i1	2484	TRINITY_DN7790_c0_g1_i1.p2	61	complete	3	41.6996	-1.57057	0.322159	-4.87512	1.0874e-06	0.000141456	13.3	3.1	1.3	0.7	Cytoplasm
3	220	Over	TRINITY_DN790_c0_g3_i1	974	TRINITY_DN790_c0_g3_i1.p1	78	complete	7.3	14.0999	-2.8763	0.764515	-3.76226	0.000168386	0.00849843	14.8	1.4	9.4	0.5	Extracellular
3	221	Over	TRINITY_DN8306_c1_g5_i1	1306	TRINITY_DN8306_c1_g5_i1.p1	87	complete	5.1	13.6707	-2.35176	0.591624	-3.97509	7.03513e-05	0.0045107	10	1.4	2.8	0.8	Cytoplasm
3	222	Over	TRINITY_DN8374_c0_g1_i1	2345	TRINITY_DN8374_c0_g1_i1.p1	80	complete	3.3	22.7636	-1.72621	0.456644	-3.78022	0.000156693	0.00812528	8	1.7	2.1	1	Extracellular	Signal peptide
3	223	Over	TRINITY_DN838_c0_g1_i8	3217	TRINITY_DN838_c0_g1_i8.p1	103	complete	12.2	11.3231	-3.61194	0.774666	-4.66258	3.12268e-06	0.000349492	3.5	0.2	1	0.2	Cytoplasm
3	224	Over	TRINITY_DN84929_c0_g1_i1	2202	TRINITY_DN84929_c0_g1_i1.p1	95	complete	6	11.2644	-2.57751	0.797297	-3.23281	0.00122581	0.0364904	4.7	0.6	2.8	0.6	Cytoplasm
3	225	Over	TRINITY_DN883_c0_g1_i7	524	TRINITY_DN883_c0_g1_i7.p1	85	complete	3.8	31.8718	-1.92862	0.598842	-3.22059	0.00127927	0.0376436	67.9	11.9	10.6	7.7	Cytoplasm
3	226	Over	TRINITY_DN9357_c0_g1_i1	1602	TRINITY_DN9357_c0_g1_i1.p1	87	complete	174.2	17.8165	-7.44476	1.26583	-5.88134	4.06955e-09	1.00643e-06	12.1	0	8.2	0	Cytoplasm|Nucleus
3	227	Over	TRINITY_DN9396_c2_g2_i3	1115	TRINITY_DN9396_c2_g2_i3.p1	85	complete	6.3	17.1552	-2.65932	0.605567	-4.39146	1.12593e-05	0.00101356	15.5	1.7	4.4	1.2	Cytoplasm
3	228	Over	TRINITY_DN966_c1_g4_i2	853	TRINITY_DN966_c1_g4_i2.p1	93	complete	5.2	14.3089	-2.37297	0.586405	-4.04664	5.19588e-05	0.00356145	17.3	2.4	5.6	1.2	Cytoplasm
4	229	Over	TRINITY_DN1015_c0_g1_i34	6206	TRINITY_DN1015_c0_g1_i34.p2~~TRINITY_DN1015_c0_g1_i34.p1~~TRINITY_DN1015_c0_g1_i34.p3			306.2	31.3152	-8.25854	1.18119	-6.99169	2.716e-12	1.11134e-09	5.1	0	2.5	0	Endoplasmic reticulum~~Nucleus~~Cytoplasm|Nucleus	Signal peptide|Transmembrane domain~~Nuclear localization signal~~Nuclear localization signal
4	230	Over	TRINITY_DN1114_c0_g1_i4	3904	TRINITY_DN1114_c0_g1_i4.p2~~TRINITY_DN1114_c0_g1_i4.p3			3.1	60.5644	-1.6145	0.389587	-4.14413	3.41105e-05	0.00253352	12.2	2.9	1.3	1.4	Cytoplasm|Nucleus~~Cytoplasm|Nucleus
4	231	Over	TRINITY_DN1183_c4_g1_i1	1577	TRINITY_DN1183_c4_g1_i1.p1~~TRINITY_DN1183_c4_g1_i1.p2			11.1	6.12682	-3.47895	1.10585	-3.14596	0.00165543	0.0456562	4	0.2	3.1	0.2	Cell membrane~~Cell membrane|Lysosome/Vacuole	0~~Signal peptide|Transmembrane domain
4	232	Over	TRINITY_DN1351_c0_g1_i6	1796	TRINITY_DN1351_c0_g1_i6.p2~~TRINITY_DN1351_c0_g1_i6.p1			15.5	30.2304	-3.9525	0.657052	-6.01551	1.79324e-09	4.74787e-07	17.2	0.8	5.3	0.6	Extracellular~~Nucleus	Signal peptide~~Nuclear localization signal
4	233	Over	TRINITY_DN141_c0_g1_i2	2160	TRINITY_DN141_c0_g1_i2.p1~~TRINITY_DN141_c0_g1_i2.p2			5.6	208.888	-2.49109	0.467858	-5.32445	1.01257e-07	1.73954e-05	88.4	11.9	13.9	10.5	Cytoplasm|Nucleus~~Cytoplasm|Extracellular	Nuclear localization signal|Nuclear export signal~~0
4	234	Over	TRINITY_DN15010_c0_g1_i6	3086	TRINITY_DN15010_c0_g1_i6.p2~~TRINITY_DN15010_c0_g1_i6.p1~~TRINITY_DN15010_c0_g1_i6.p4			6.2	58.6767	-2.63711	0.584085	-4.51493	6.33362e-06	0.000627921	16.9	1.9	10.9	0.5	Cytoplasm|Nucleus~~Cytoplasm|Nucleus~~Cytoplasm|Nucleus	0~~Nuclear localization signal~~Nuclear localization signal|Nuclear export signal
4	235	Over	TRINITY_DN16620_c1_g1_i1	3723	TRINITY_DN16620_c1_g1_i1.p1~~TRINITY_DN16620_c1_g1_i1.p2			2.2	116.705	-1.16735	0.242087	-4.82203	1.42102e-06	0.000177667	22.4	7	3.2	1.5	Cytoplasm~~Extracellular|Mitochondrion
4	236	Over	TRINITY_DN21416_c0_g2_i1	956	TRINITY_DN21416_c0_g2_i1.p3~~TRINITY_DN21416_c0_g2_i1.p2~~TRINITY_DN21416_c0_g2_i1.p1			4	15.6548	-2.01353	0.507967	-3.96389	7.37386e-05	0.00464842	15.8	2.8	2.9	1.8	Nucleus~~Cytoplasm~~Nucleus
4	237	Over	TRINITY_DN2157_c0_g5_i1	2981	TRINITY_DN2157_c0_g5_i1.p1~~TRINITY_DN2157_c0_g5_i1.p4			2.1	1265.48	-1.09531	0.220074	-4.97699	6.458e-07	9.02717e-05	302.8	100.2	24.9	27.4	Nucleus~~Cytoplasm
4	238	Over	TRINITY_DN25373_c0_g2_i1	2167	TRINITY_DN25373_c0_g2_i1.p1~~TRINITY_DN25373_c0_g2_i1.p2			3.2	738.436	-1.67039	0.285438	-5.85204	4.85567e-09	1.18444e-06	277	63.4	29.4	28.8	Cytoplasm|Nucleus~~Cytoplasm	0~~Nuclear localization signal
4	239	Over	TRINITY_DN2696_c0_g1_i6	3482	TRINITY_DN2696_c0_g1_i6.p1~~TRINITY_DN2696_c0_g1_i6.p2			12.3	34.9742	-3.62235	0.621752	-5.82604	5.67581e-09	1.34457e-06	9.6	0.6	3.9	0.3	Cytoplasm|Nucleus~~Cytoplasm|Nucleus	Nuclear export signal~~Nuclear localization signal
4	240	Over	TRINITY_DN2971_c0_g1_i7	3246	TRINITY_DN2971_c0_g1_i7.p1~~TRINITY_DN2971_c0_g1_i7.p2			2.3	66.3894	-1.22464	0.322938	-3.79218	0.000149331	0.00779741	15.1	4.5	4.3	0.8	Cytoplasm|Nucleus~~Cytoplasm	Nuclear localization signal|Nuclear export signal~~0
4	241	Over	TRINITY_DN3560_c5_g1_i1	1029	TRINITY_DN3560_c5_g1_i1.p1~~TRINITY_DN3560_c5_g1_i1.p2			3.7	10.7126	-1.86951	0.555357	-3.36633	0.000761765	0.025741	9.6	1.9	2	1	Nucleus~~Cytoplasm
4	242	Over	TRINITY_DN38153_c0_g1_i1	3258	TRINITY_DN38153_c0_g1_i1.p3~~TRINITY_DN38153_c0_g1_i1.p2~~TRINITY_DN38153_c0_g1_i1.p6			4.4	73.1251	-2.14302	0.572057	-3.74616	0.000179559	0.00896002	19.2	3.1	3.9	2.1	Mitochondrion~~Cytoplasm|Nucleus~~Cytoplasm|Nucleus	0~~Nuclear localization signal~~Nuclear localization signal
4	243	Over	TRINITY_DN49037_c0_g1_i1	2563	TRINITY_DN49037_c0_g1_i1.p5~~TRINITY_DN49037_c0_g1_i1.p6~~TRINITY_DN49037_c0_g1_i1.p1~~TRINITY_DN49037_c0_g1_i1.p4			2.8	80.5503	-1.45956	0.306105	-4.76818	1.85896e-06	0.000220189	24.4	6.2	3.8	1.8	Cytoplasm~~Cytoplasm~~Cytoplasm|Nucleus~~Cytoplasm	0~~0~~Nuclear localization signal~~0
4	244	Over	TRINITY_DN6358_c0_g2_i11	6324	TRINITY_DN6358_c0_g2_i11.p1~~TRINITY_DN6358_c0_g2_i11.p3~~TRINITY_DN6358_c0_g2_i11.p7			2.2	78.55	-1.1512	0.307445	-3.74441	0.000180817	0.00898296	8.7	2.7	2.1	0.5	Cytoplasm~~Cytoplasm~~Endoplasmic reticulum
4	245	Over	TRINITY_DN6358_c0_g2_i17	6318	TRINITY_DN6358_c0_g2_i17.p7~~TRINITY_DN6358_c0_g2_i17.p1~~TRINITY_DN6358_c0_g2_i17.p3			2.2	205.124	-1.13624	0.315356	-3.60304	0.000314522	0.013208	22.7	7.3	6.4	1.7	Endoplasmic reticulum~~Cytoplasm~~Cytoplasm
4	246	Over	TRINITY_DN838_c0_g1_i6	2741	TRINITY_DN838_c0_g1_i6.p1~~TRINITY_DN838_c0_g1_i6.p2			8.3	10.5479	-3.04773	0.690062	-4.4166	1.00266e-05	0.00091356	3.6	0.3	0.9	0.3	Cytoplasm~~Cytoplasm
5	247	Over	TRINITY_DN1000_c0_g1_i2	624				10.7	6.82234	-3.4186	1.05176	-3.25035	0.00115265	0.0347726	12.8	0.9	7.6	1.1
5	248	Over	TRINITY_DN10178_c3_g1_i1	646				3.4	23.5235	-1.75478	0.549275	-3.19472	0.00139969	0.0403277	36.8	7.5	9.2	4.1
5	249	Over	TRINITY_DN10269_c2_g1_i1	673				8.2	6.62701	-3.02738	0.893146	-3.38957	0.000700031	0.0242746	11.1	1	2.6	1.1
5	250	Over	TRINITY_DN10723_c2_g1_i1	213				2.1	101.31	-1.07633	0.339095	-3.17412	0.00150293	0.0424183	915.7	309.9	86.6	115.5
5	251	Over	TRINITY_DN11073_c0_g3_i7	993				9.8	13.2977	-3.29857	0.857562	-3.84645	0.00011984	0.00659412	14.2	1	6.6	1
5	252	Over	TRINITY_DN1108_c1_g1_i4	963				10.2	9.75524	-3.35451	0.909282	-3.68918	0.000224977	0.0104179	10.9	0.8	3.5	1
5	253	Over	TRINITY_DN1128_c0_g1_i7	2516				2.8	19.3907	-1.49622	0.420237	-3.56041	0.000370281	0.0150418	6.1	1.5	0.9	0.9
5	254	Over	TRINITY_DN1131_c0_g2_i8	1860				2.9	23.3159	-1.55103	0.486941	-3.18524	0.00144632	0.0411567	10.2	2.4	3.2	1.1
5	255	Over	TRINITY_DN11661_c4_g1_i1	806				15.3	39.1961	-3.93573	0.756603	-5.20185	1.97313e-07	3.04146e-05	56.1	2.3	7.6	1.9
5	256	Over	TRINITY_DN11668_c0_g1_i2	598				12.7	9.16758	-3.66649	0.908747	-4.03466	5.46808e-05	0.0037066	18.9	1.2	8.4	1.1
5	257	Over	TRINITY_DN11819_c0_g1_i2	1273				2.8	24.8399	-1.49752	0.446592	-3.35322	0.000798758	0.0265183	16.2	4	4.4	0.8
5	258	Over	TRINITY_DN12_c0_g2_i11	191				4.8	7.44137	-2.27639	0.72227	-3.15172	0.00162311	0.0450288	104.9	15	36.2	9.4
5	259	Over	TRINITY_DN1225_c0_g1_i9	3206				3.4	94.1599	-1.75058	0.454602	-3.8508	0.000117733	0.00654792	23.7	4.9	4.9	2.5
5	260	Over	TRINITY_DN1281_c0_g1_i1	881				4.5	17.646	-2.18523	0.612621	-3.56702	0.000361069	0.0146941	19.5	3	9.1	1.4
5	261	Over	TRINITY_DN1368_c0_g1_i2	3126				3.3	50.8451	-1.73949	0.492779	-3.52996	0.000415616	0.0164095	13.1	2.7	1.2	1.4
5	262	Over	TRINITY_DN1376_c4_g2_i13	659				5.9	5.73901	-2.56875	0.803154	-3.19833	0.00138225	0.0399326	9.8	1.2	2.9	0.5
5	263	Over	TRINITY_DN1389_c1_g5_i1	685				4.2	31.0971	-2.06964	0.630748	-3.28125	0.00103347	0.0320362	47.8	7.9	25.4	5.6
5	264	Over	TRINITY_DN1444_c0_g3_i1	832				3.1	237.58	-1.65391	0.499039	-3.31419	0.000919099	0.0294229	265.7	65	45.9	59.8
5	265	Over	TRINITY_DN1460_c0_g1_i11	1531				3.3	96.7624	-1.715	0.522533	-3.2821	0.00103038	0.0320112	53.5	10.7	8.8	5.9
5	266	Over	TRINITY_DN1579_c1_g2_i19	1730				4.1	31.5789	-2.04643	0.614161	-3.33207	0.000862032	0.0279943	15.8	2.8	8.6	1.5
5	267	Over	TRINITY_DN17263_c0_g1_i1	439				3.8	9.00598	-1.9419	0.608461	-3.19149	0.0014154	0.0404907	25.2	4.6	6.6	2.4
5	268	Over	TRINITY_DN1802_c2_g3_i1	571				2.6	23.2083	-1.39899	0.44016	-3.17836	0.00148109	0.0419797	39.9	10.8	11.6	2.9
5	269	Over	TRINITY_DN1820_c0_g1_i1	2223				3.3	21.6668	-1.70723	0.427246	-3.9959	6.44485e-05	0.0042493	8	1.7	1.9	0.5
5	270	Over	TRINITY_DN18226_c0_g1_i3	1319				138.8	14.194	-7.11723	1.27166	-5.5968	2.18351e-08	4.31051e-06	12.1	0	7.8	0
5	271	Over	TRINITY_DN18378_c1_g1_i1	456				4.4	11.1657	-2.13233	0.585472	-3.64207	0.000270452	0.0119957	29.7	4.8	7.3	0.9
5	272	Over	TRINITY_DN187_c0_g1_i1	1868				3.7	41.8988	-1.8905	0.426188	-4.43584	9.17138e-06	0.000852901	19.3	3.7	6.8	1.4
5	273	Over	TRINITY_DN19195_c2_g1_i1	304				6.8	19.0823	-2.76635	0.541205	-5.11148	3.19649e-07	4.82799e-05	111	10.4	6.4	9
5	274	Over	TRINITY_DN19293_c0_g3_i1	1809				2.9	63.2988	-1.51512	0.432985	-3.49925	0.000466576	0.0178881	27.9	6.6	6.3	1.8
5	275	Over	TRINITY_DN1984_c1_g1_i3	834				2.4	116.311	-1.24874	0.33473	-3.7306	0.000191025	0.00934568	120.2	34.6	32.2	5.6
5	276	Over	TRINITY_DN2033_c0_g1_i1	2918				2.8	596.377	-1.50821	0.361965	-4.16673	3.09003e-05	0.0023336	158.9	40.8	19.8	21.8
5	277	Over	TRINITY_DN2033_c0_g2_i1	392				5.8	13.2365	-2.53799	0.733491	-3.46016	0.000539862	0.0198848	46.9	5.6	20.8	4.5
5	278	Over	TRINITY_DN2116_c0_g1_i4	453				2.5	25.7201	-1.29851	0.387027	-3.35508	0.000793411	0.0264529	61.8	17.5	7.9	8.3
5	279	Over	TRINITY_DN214_c0_g1_i2	1802				9.2	29.2455	-3.19765	0.7331	-4.36183	1.28981e-05	0.00109952	16	1.3	4.9	1.4
5	280	Over	TRINITY_DN2165_c0_g1_i1	1212				3	20.3635	-1.59541	0.494303	-3.22759	0.00124838	0.0369183	14.5	3.3	5.6	1
5	281	Over	TRINITY_DN2303_c4_g1_i1	1172				9	40.9346	-3.16787	0.513698	-6.16679	6.96894e-10	2.03683e-07	35.7	2.8	6.3	1.4
5	282	Over	TRINITY_DN233_c2_g2_i1	783				9.6	167.243	-3.25643	1.03901	-3.13415	0.00172353	0.0471301	244.1	17.9	169.1	19.2
5	283	Over	TRINITY_DN2392_c2_g1_i1	642				4.5	16.0556	-2.18062	0.561397	-3.88427	0.000102638	0.00609466	26.6	4.2	4.2	1.9
5	284	Over	TRINITY_DN2476_c0_g1_i3	1114				14.3	8.21062	-3.84116	1.12035	-3.42855	0.000606813	0.0217112	8.2	0.4	3.6	0.8
5	285	Over	TRINITY_DN2545_c0_g1_i1	2447				3	66.9766	-1.60731	0.450228	-3.56999	0.000356994	0.0146608	21.8	5.2	3.1	3
5	286	Over	TRINITY_DN25715_c0_g1_i9	2185				7.5	46.0933	-2.91382	0.610149	-4.77559	1.79181e-06	0.00021524	20.1	2	3.1	2
5	287	Over	TRINITY_DN2641_c0_g2_i1	565				3.5	15.1719	-1.81507	0.527673	-3.43976	0.000582227	0.0209648	29.2	6	4.8	4.6
5	288	Over	TRINITY_DN2696_c0_g1_i4	726				59.6	6.11899	-5.89762	1.26935	-4.64618	3.38145e-06	0.000374874	10.5	0	4.3	0
5	289	Over	TRINITY_DN2696_c0_g1_i5	1699				552.5	56.4664	-9.1097	1.16926	-7.79101	6.64774e-15	4.82604e-12	36	0	16.7	0
5	290	Over	TRINITY_DN278_c0_g1_i16	859				2.3	94.4158	-1.19042	0.330328	-3.60376	0.000313641	0.013208	92.4	28	9.6	7.7
5	291	Over	TRINITY_DN3255_c0_g1_i1	1734				157.8	16.1124	-7.30196	1.88459	-3.87457	0.000106815	0.00620694	10.4	0	8.3	0
5	292	Over	TRINITY_DN3393_c3_g1_i1	1010				4.9	7.24675	-2.27925	0.689822	-3.30412	0.000952763	0.0302959	7.2	1	1.8	0.8
5	293	Over	TRINITY_DN3450_c0_g1_i1	1561				51.9	5.28219	-5.69751	1.24201	-4.58731	4.48985e-06	0.000476622	3.8	0	1.4	0
5	294	Over	TRINITY_DN349_c1_g1_i9	1479				5	37.7291	-2.33312	0.479045	-4.87036	1.11394e-06	0.000143253	23.8	3.3	6.4	1.8
5	295	Over	TRINITY_DN3506_c1_g3_i3	848				3.3	27.1495	-1.73928	0.438476	-3.96664	7.28938e-05	0.00462106	29.6	6.1	5.6	1.9
5	296	Over	TRINITY_DN3592_c0_g1_i2	1043				129.4	21.8628	-7.01564	1.21403	-5.77881	7.52312e-09	1.74544e-06	24.4	0.1	14	0.2
5	297	Over	TRINITY_DN3634_c2_g2_i1	374				53.1	36.1848	-5.73121	0.852338	-6.72411	1.76664e-11	6.41261e-09	162.1	2.2	77.7	1.7
5	298	Over	TRINITY_DN3701_c0_g1_i1	922				20	5.27662	-4.32193	1.23323	-3.50455	0.000457379	0.0176558	6.7	0.2	3.9	0.4
5	299	Over	TRINITY_DN379_c6_g1_i1	895				2.7	56.7803	-1.43564	0.404098	-3.55271	0.000381288	0.0154332	55.9	14.3	17.3	4.9
5	300	Over	TRINITY_DN3815_c1_g1_i7	649				5.2	6.47524	-2.3737	0.735693	-3.22648	0.00125322	0.0370128	11.1	1.6	1.1	1.3
5	301	Over	TRINITY_DN39447_c0_g1_i1	1420				3.1	20.0036	-1.621	0.507933	-3.19138	0.00141596	0.0404907	11.7	2.7	4.4	0.7
5	302	Over	TRINITY_DN4021_c1_g1_i1	1118				4.9	20.1956	-2.29811	0.704062	-3.26407	0.00109825	0.0336274	17.5	2.5	8.4	2.2
5	303	Over	TRINITY_DN4023_c1_g5_i1	933				3.4	19.086	-1.78355	0.552057	-3.23073	0.00123474	0.0366595	19.3	4.1	5.5	3.4
5	304	Over	TRINITY_DN4027_c6_g1_i1	861				3.6	210.333	-1.83349	0.518492	-3.53621	0.000405917	0.0161684	232	48.7	110.9	33.9
5	305	Over	TRINITY_DN42205_c0_g1_i1	543				16.3	6.56766	-4.02479	1.06661	-3.77342	0.000161024	0.00827364	15.9	0.7	6.5	0.8
5	306	Over	TRINITY_DN4224_c0_g1_i1	1398				2.7	169.939	-1.4435	0.361181	-3.99663	6.42516e-05	0.0042493	99.4	26.4	27.1	12.3
5	307	Over	TRINITY_DN4404_c0_g1_i10	388				2.5	25.61	-1.30777	0.419152	-3.12003	0.00180834	0.0487385	78.3	21.9	26.2	5
5	308	Over	TRINITY_DN4461_c0_g1_i5	871				4.2	13.923	-2.06383	0.596228	-3.46148	0.000537208	0.0198353	15.8	2.5	5.5	1.5
5	309	Over	TRINITY_DN453_c0_g1_i8	1609				2.3	81.2938	-1.1912	0.298193	-3.99475	6.47638e-05	0.0042493	38.7	11.7	6.4	2.5
5	310	Over	TRINITY_DN458_c0_g1_i1	2704				2.7	150.536	-1.41878	0.411326	-3.44928	0.000562091	0.020469	42.9	10.8	11.2	4.1
5	311	Over	TRINITY_DN4714_c1_g1_i1	1498				4	26.1933	-1.99192	0.458577	-4.3437	1.40101e-05	0.00118089	15.5	2.7	3.6	1.3
5	312	Over	TRINITY_DN4764_c0_g1_i1	1042				37.5	10.6501	-5.22786	1.09577	-4.77095	1.83361e-06	0.000218335	11.4	0.2	3.7	0.3
5	313	Over	TRINITY_DN4886_c0_g1_i11	1272				2.5	40.374	-1.31239	0.373706	-3.51183	0.000445025	0.0172976	25.7	7.3	8	1.1
5	314	Over	TRINITY_DN48868_c0_g1_i1	761				6.8	6.25439	-2.75626	0.863517	-3.19189	0.00141343	0.0404907	8.9	0.9	2.2	1.1
5	315	Over	TRINITY_DN491_c1_g2_i1	877				4.2	17.0376	-2.07638	0.511297	-4.06101	4.88608e-05	0.00339387	19.3	3.2	4.2	2.1
5	316	Over	TRINITY_DN4941_c0_g1_i14	609				7.2	16.0208	-2.84044	0.64996	-4.37017	1.2415e-05	0.00107483	31	3.1	3.8	3.1
5	317	Over	TRINITY_DN5021_c1_g4_i1	1050				4.6	15.5346	-2.19681	0.540034	-4.0679	4.74387e-05	0.00332588	14.4	2.2	5.4	1
5	318	Over	TRINITY_DN51099_c0_g1_i1	387				30	5.17267	-4.90745	1.27166	-3.85907	0.000113817	0.00646834	21.9	0.4	12.2	0.8
5	319	Over	TRINITY_DN5345_c3_g1_i2	237				3.9	13.986	-1.97493	0.504876	-3.91171	9.16435e-05	0.00558475	118.3	21.6	12.2	8.2
5	320	Over	TRINITY_DN5364_c0_g2_i3	711				9.3	5.40576	-3.21507	1.00938	-3.1852	0.00144656	0.0411567	8.9	0.7	5.3	0.6
5	321	Over	TRINITY_DN5417_c4_g1_i4	949				4.8	82.2037	-2.25537	0.570656	-3.95224	7.74238e-05	0.00485355	84.9	11.7	7.2	7.5
5	322	Over	TRINITY_DN57097_c0_g1_i1	614				35.8	6.24076	-5.16112	1.15549	-4.46663	7.94621e-06	0.000754555	13.1	0.2	1.7	0.5
5	323	Over	TRINITY_DN581_c10_g1_i1	822				3.9	12.0706	-1.98142	0.599701	-3.30402	0.000953101	0.0302959	14.5	2.6	5.5	1.3
5	324	Over	TRINITY_DN5860_c0_g1_i9	817				5.3	31.6381	-2.40184	0.665338	-3.60995	0.000306255	0.0130024	39.6	5.3	17.8	3.5
5	325	Over	TRINITY_DN5932_c0_g1_i1	922				5.6	6.24807	-2.49546	0.76924	-3.24406	0.00117838	0.0352653	6.9	0.9	1.5	0.7
5	326	Over	TRINITY_DN603_c0_g1_i21	684				2.1	122.795	-1.04242	0.316372	-3.29491	0.000984518	0.0310959	155.9	51.4	29.3	7.4
5	327	Over	TRINITY_DN6043_c0_g1_i1	1257				8.2	16.1179	-3.03751	0.700116	-4.33859	1.434e-05	0.00120419	12.8	1.1	2.4	0.9
5	328	Over	TRINITY_DN6070_c0_g1_i10	1016				24.3	6.30009	-4.59993	1.25415	-3.66777	0.000244673	0.0111367	7.1	0.2	3.6	0.3
5	329	Over	TRINITY_DN633_c0_g2_i2	1612				15.3	90.4672	-3.93275	0.554497	-7.09248	1.31734e-12	5.92935e-10	58.1	2.6	12.2	1.9
5	330	Over	TRINITY_DN6330_c0_g4_i2	1283				3.2	17.0405	-1.66362	0.516643	-3.22007	0.00128161	0.0376436	11.7	2.6	2.1	1.9
5	331	Over	TRINITY_DN6430_c0_g1_i13	901				4.6	23.9891	-2.2049	0.622169	-3.54389	0.000394268	0.0158447	26.7	4.1	13.7	2.4
5	332	Over	TRINITY_DN655_c0_g3_i1	3657				2	409.253	-1.03466	0.190726	-5.42488	5.79931e-08	1.05253e-05	78	26.6	8.7	3.4
5	333	Over	TRINITY_DN6769_c0_g1_i6	825				3.8	10.0038	-1.92696	0.590656	-3.26241	0.00110468	0.0337324	11.8	2.2	4.2	0.7
5	334	Over	TRINITY_DN68_c1_g1_i1	906				4.3	42.4366	-2.1029	0.565923	-3.71589	0.000202492	0.0097582	45.7	7.5	14.1	4.9
5	335	Over	TRINITY_DN710_c0_g1_i25	1371				3.1	29.2631	-1.65177	0.516933	-3.19532	0.00139675	0.0402998	18.1	3.9	2.3	1.7
5	336	Over	TRINITY_DN7118_c0_g3_i1	484				52.7	5.38057	-5.71996	1.19762	-4.77612	1.7871e-06	0.00021524	16.3	0	4.6	0
5	337	Over	TRINITY_DN7260_c1_g1_i1	715				2.1	57.4588	-1.0609	0.297019	-3.57184	0.000354476	0.0145841	68.7	22.9	8.8	3
5	338	Over	TRINITY_DN72892_c0_g1_i1	1896				7.2	9.08584	-2.85681	0.764193	-3.73834	0.000185242	0.00910233	4.5	0.4	1.4	0.3
5	339	Over	TRINITY_DN731_c5_g1_i1	680				2.3	37.4148	-1.17094	0.320171	-3.65725	0.000254935	0.0114517	49.2	15.3	6.1	5.2
5	340	Over	TRINITY_DN760_c1_g1_i16	353				6.6	29.5806	-2.71797	0.805343	-3.37492	0.000738365	0.025101	127.2	15.2	42.4	19.5
5	341	Over	TRINITY_DN762_c1_g1_i14	895				2.5	78.5674	-1.29539	0.41565	-3.11653	0.00182993	0.0491439	75.7	22.3	23.8	13.7
5	342	Over	TRINITY_DN7719_c0_g1_i4	1626				16.8	16.6561	-4.07455	0.777581	-5.24003	1.60552e-07	2.59943e-05	10.6	0.5	2.6	0.6
5	343	Over	TRINITY_DN7727_c0_g1_i3	897				2.7	59.4618	-1.42418	0.308789	-4.61215	3.98534e-06	0.000427096	58	15	5.1	3.7
5	344	Over	TRINITY_DN7810_c0_g1_i1	1838				3.2	35.7908	-1.66397	0.440319	-3.77901	0.000157452	0.00814587	16.3	3.7	2	2.8
5	345	Over	TRINITY_DN782_c0_g1_i13	687				5.5	42.3143	-2.45372	0.4641	-5.28705	1.24305e-07	2.10337e-05	66.5	8.5	20.2	2.4
5	346	Over	TRINITY_DN797_c0_g2_i1	903				6.4	5.86289	-2.68524	0.799449	-3.35886	0.000782656	0.0263223	6.8	0.7	2.2	0.2
5	347	Over	TRINITY_DN800_c2_g1_i1	1238				9.9	19.3378	-3.30482	0.868344	-3.80589	0.000141295	0.00742954	16.4	1.2	3.9	1.9
5	348	Over	TRINITY_DN8295_c0_g6_i1	518				4.1	33.8923	-2.04187	0.358297	-5.69881	1.20647e-08	2.59171e-06	75.4	12.8	8.8	5.2
5	349	Over	TRINITY_DN8325_c0_g1_i8	388				9.5	5.74097	-3.24728	1.0259	-3.16528	0.00154932	0.0433676	23.3	1.5	4.7	3
5	350	Over	TRINITY_DN838_c0_g1_i3	1164				4.2	25.8154	-2.0711	0.468087	-4.42461	9.66185e-06	0.000891147	20.8	3.6	5.2	2
5	351	Over	TRINITY_DN838_c0_g1_i9	1290				5	11.029	-2.31077	0.562663	-4.10685	4.01094e-05	0.0028839	8	1.2	1.8	0.2
5	352	Over	TRINITY_DN838_c0_g3_i1	2142				5.4	45.184	-2.42027	0.42657	-5.67379	1.39675e-08	2.93775e-06	19.2	2.6	2.6	1.7
5	353	Over	TRINITY_DN84899_c0_g1_i1	1305				3.3	43.4718	-1.71794	0.536486	-3.20221	0.00136377	0.0396021	29.1	6.6	1.9	5.9
5	354	Over	TRINITY_DN8490_c0_g2_i2	1001				3.6	34.7525	-1.84673	0.538612	-3.42868	0.000606527	0.0217112	32.2	6.2	13.1	3.6
5	355	Over	TRINITY_DN8758_c0_g1_i2	2601				4.3	23.4451	-2.10154	0.572784	-3.66898	0.000243516	0.0111367	7.6	1.2	3.1	0.6
5	356	Over	TRINITY_DN91_c1_g2_i5	2154				17	7.24422	-4.09005	1.03391	-3.95592	7.62413e-05	0.00479276	3.4	0.1	0.7	0.3
5	357	Over	TRINITY_DN910_c0_g2_i1	1702				2.1	79.4939	-1.05334	0.305661	-3.4461	0.000568733	0.0206441	34.4	11.4	4	2
5	358	Over	TRINITY_DN9244_c0_g1_i3	1622				4.6	10.7479	-2.19466	0.592708	-3.70277	0.000213259	0.0100827	6.1	0.9	1.2	0.8
5	359	Over	TRINITY_DN9897_c0_g2_i1	769				19.8	5.27597	-4.3084	1.18338	-3.64075	0.000271842	0.0119957	8.3	0.2	2.8	0.5
[truncated: 6 more columns]

## Sheet: Apo_Under_FINAL
Code	Trans numb	Diff. Exp. q-Apo	Transcript code	Trans. Length	Protein code	Prot. Length	Protein type	Fold Change (Control/q-Apo)	baseMean	log2FoldChange	lfcSE	stat	pvalue	padj	Mean TPM q-Apob FB	Mean TPM Control FB	SD TPM q-Apob FB	SD TPM Control FB	DeepLoc Localizations	DeepLoc Signals	BLASTP Best hit Subject product	BLASTP Feature comment	BLASTP Length subject	BLASTP subject acc.ver	BLASTP %id	BLASTP alignment length	seed_ortholog	evalue	score	eggNOG_OGs	max_annot_lvl	COG_code	Description	PFAMs	Preferred_name	GOs	EC	KEGG_ko	KEGG ko-1	ko-1 symbol	ko-1 name	KEGG ko-2	ko-2 symbol	ko-2 name	KEGG ko-3	KEGG ko-4	KEGG ko-5	KEGG Pathway	KEGG Module
1	1	Under	TRINITY_DN10127_c0_g1_i1	1067	TRINITY_DN10127_c0_g1_i1.p1	247	complete	5	31.2792	2.32828	0.7388	3.15144	0.00162468	0.0450288	5.5	22.1	3.1	21.4	Nucleus	Nuclear export signal							136037.KDR23061	9.18e-114	333	KOG4304@1|root,KOG4304@2759|Eukaryota,3A0RW@33154|Opisthokonta,3BCCC@33208|Metazoa,3CV4Q@33213|Bilateria,41YSJ@6656|Arthropoda,3SKY7@50557|Insecta	33208|Metazoa	K	It is involved in the biological process described with regulation of transcription, DNA-templated	HLH,Hairy_orange	HES6	GO:0000122,GO:0000981,GO:0000982,GO:0001067,GO:0001078,GO:0001227,GO:0001654,GO:0001745,GO:0001751,GO:0001754,GO:0002052,GO:0003002,GO:0003674,GO:0003676,GO:0003677,GO:0003690,GO:0003700,GO:0005488,GO:0005515,GO:0005575,GO:0005622,GO:0005623,GO:0005634,GO:0006355,GO:0006357,GO:0007275,GO:0007389,GO:0007399,GO:0007423,GO:0007444,GO:0007447,GO:0007450,GO:0007525,GO:0008134,GO:0008150,GO:0008284,GO:…	-	ko:K09087,ko:K09090	K09087	HES2_6_7	hairy and enhancer of split 2/6/7	K09090	HESN	hairy and enhancer of split, invertebrate				ko05165,map05165	-
1	2	Under	TRINITY_DN1029_c1_g1_i1	1597	TRINITY_DN1029_c1_g1_i1.p1	348	complete	9.4	67.8843	3.23876	0.876341	3.69578	0.000219216	0.0102567	4.5	35.6	1.5	51.3	Mitochondrion	Mitochondrial transit peptide							136037.KDR21308	1.25e-226	627	COG0190@1|root,KOG0089@2759|Eukaryota,38DGG@33154|Opisthokonta,3B98B@33208|Metazoa,3CT16@33213|Bilateria,41TQN@6656|Arthropoda,3SHF7@50557|Insecta	33208|Metazoa	H	methylenetetrahydrofolate dehydrogenase (NADP ) activity. It is involved in the biological process described with	THF_DHG_CYH,THF_DHG_CYH_C	Nmdmc	GO:0000287,GO:0003674,GO:0003824,GO:0004477,GO:0004487,GO:0004488,GO:0005488,GO:0005575,GO:0005622,GO:0005623,GO:0005737,GO:0005739,GO:0005975,GO:0006082,GO:0006575,GO:0006725,GO:0006730,GO:0006732,GO:0006760,GO:0006807,GO:0008150,GO:0008152,GO:0009256,GO:0009987,GO:0016491,GO:0016645,GO:0016646,GO:0016787,GO:0016810,GO:0016814,GO:0019238,GO:0019752,GO:0034641,GO:0042301,GO:0042558,GO:0043167,GO:…	1.1.1.79,1.1.1.81,1.5.1.15,3.5.4.9	ko:K00049,ko:K13403	K00049	GRHPR	glyoxylate/hydroxypyruvate reductase	K13403	MTHFD2	methylenetetrahydrofolate dehydrogenase(NAD+) / 5,10-methenyltetrahydrofolate cyclohydrolase				ko00260,ko00620,ko00630,ko00670,ko01100,ko01110,ko01120,map00260,map00620,map00630,map00670,map01100,map01110,map01120	M00141
1	3	Under	TRINITY_DN106_c0_g1_i16	1122	TRINITY_DN106_c0_g1_i16.p1	302	complete	93.4	30.2477	6.54502	1.13601	5.76143	8.34029e-09	1.89594e-06	0.3	20.2	0.7	9.4	Cytoplasm								136037.KDR15118	1.13e-150	441	COG0554@1|root,KOG2517@2759|Eukaryota,38DGY@33154|Opisthokonta,3B9PY@33208|Metazoa,3CVSP@33213|Bilateria,41WY4@6656|Arthropoda,3SHHF@50557|Insecta	33208|Metazoa	G	Glycerol kinase activity. It is involved in the biological process described with carbohydrate metabolic process	FGGY_C,FGGY_N	GK	GO:0003674,GO:0003824,GO:0004370,GO:0005488,GO:0005515,GO:0005575,GO:0005622,GO:0005623,GO:0005634,GO:0005737,GO:0005739,GO:0005740,GO:0005741,GO:0005829,GO:0005975,GO:0006066,GO:0006071,GO:0006072,GO:0006629,GO:0006638,GO:0006639,GO:0006641,GO:0006793,GO:0006796,GO:0006950,GO:0008150,GO:0008152,GO:0008610,GO:0009058,GO:0009266,GO:0009409,GO:0009628,GO:0009636,GO:0009987,GO:0010033,GO:0010565,GO:…	2.7.1.30	ko:K00864	K00864	glpK, GK	glycerol kinase							ko00561,ko01100,ko03320,ko04626,map00561,map01100,map03320,map04626	-
1	4	Under	TRINITY_DN106_c0_g1_i19	2445	TRINITY_DN106_c0_g1_i19.p1	535	complete	14.3	771.352	3.83506	0.728697	5.2629	1.41801e-07	2.36387e-05	21.8	206.4	14.6	143.5	Cytoplasm	Nuclear localization signal							136037.KDR15118	0	901	COG0554@1|root,KOG2517@2759|Eukaryota,38DGY@33154|Opisthokonta,3B9PY@33208|Metazoa,3CVSP@33213|Bilateria,41WY4@6656|Arthropoda,3SHHF@50557|Insecta	33208|Metazoa	G	Glycerol kinase activity. It is involved in the biological process described with carbohydrate metabolic process	FGGY_C,FGGY_N	GK	GO:0003674,GO:0003824,GO:0004370,GO:0005488,GO:0005515,GO:0005575,GO:0005622,GO:0005623,GO:0005634,GO:0005737,GO:0005739,GO:0005740,GO:0005741,GO:0005829,GO:0005975,GO:0006066,GO:0006071,GO:0006072,GO:0006629,GO:0006638,GO:0006639,GO:0006641,GO:0006793,GO:0006796,GO:0006950,GO:0008150,GO:0008152,GO:0008610,GO:0009058,GO:0009266,GO:0009409,GO:0009628,GO:0009636,GO:0009987,GO:0010033,GO:0010565,GO:…	2.7.1.30	ko:K00864	K00864	glpK, GK	glycerol kinase							ko00561,ko01100,ko03320,ko04626,map00561,map01100,map03320,map04626	-
1	5	Under	TRINITY_DN106_c0_g1_i22	2441	TRINITY_DN106_c0_g1_i22.p1	535	complete	17.9	615.079	4.16251	0.615287	6.76515	1.33174e-11	4.99514e-09	14.2	162.5	4.2	99.9	Cytoplasm	Nuclear localization signal							136037.KDR15118	0	901	COG0554@1|root,KOG2517@2759|Eukaryota,38DGY@33154|Opisthokonta,3B9PY@33208|Metazoa,3CVSP@33213|Bilateria,41WY4@6656|Arthropoda,3SHHF@50557|Insecta	33208|Metazoa	G	Glycerol kinase activity. It is involved in the biological process described with carbohydrate metabolic process	FGGY_C,FGGY_N	GK	GO:0003674,GO:0003824,GO:0004370,GO:0005488,GO:0005515,GO:0005575,GO:0005622,GO:0005623,GO:0005634,GO:0005737,GO:0005739,GO:0005740,GO:0005741,GO:0005829,GO:0005975,GO:0006066,GO:0006071,GO:0006072,GO:0006629,GO:0006638,GO:0006639,GO:0006641,GO:0006793,GO:0006796,GO:0006950,GO:0008150,GO:0008152,GO:0008610,GO:0009058,GO:0009266,GO:0009409,GO:0009628,GO:0009636,GO:0009987,GO:0010033,GO:0010565,GO:…	2.7.1.30	ko:K00864	K00864	glpK, GK	glycerol kinase							ko00561,ko01100,ko03320,ko04626,map00561,map01100,map03320,map04626	-
1	6	Under	TRINITY_DN106_c0_g1_i4	2125	TRINITY_DN106_c0_g1_i4.p1	559	complete	6.7	399.995	2.75217	0.635428	4.33121	1.48294e-05	0.00123244	26.2	112	9.5	65.4	Endoplasmic reticulum	Peroxisomal targeting signal							136037.KDR15118	0	951	COG0554@1|root,KOG2517@2759|Eukaryota,38DGY@33154|Opisthokonta,3B9PY@33208|Metazoa,3CVSP@33213|Bilateria,41WY4@6656|Arthropoda,3SHHF@50557|Insecta	33208|Metazoa	G	Glycerol kinase activity. It is involved in the biological process described with carbohydrate metabolic process	FGGY_C,FGGY_N	GK	GO:0003674,GO:0003824,GO:0004370,GO:0005488,GO:0005515,GO:0005575,GO:0005622,GO:0005623,GO:0005634,GO:0005737,GO:0005739,GO:0005740,GO:0005741,GO:0005829,GO:0005975,GO:0006066,GO:0006071,GO:0006072,GO:0006629,GO:0006638,GO:0006639,GO:0006641,GO:0006793,GO:0006796,GO:0006950,GO:0008150,GO:0008152,GO:0008610,GO:0009058,GO:0009266,GO:0009409,GO:0009628,GO:0009636,GO:0009987,GO:0010033,GO:0010565,GO:…	2.7.1.30	ko:K00864	K00864	glpK, GK	glycerol kinase							ko00561,ko01100,ko03320,ko04626,map00561,map01100,map03320,map04626	-
1	7	Under	TRINITY_DN10850_c0_g1_i1	3147	TRINITY_DN10850_c0_g1_i1.p1	372	complete	13.2	249.332	3.72607	0.87329	4.2667	1.98384e-05	0.00157206	5.8	49.5	2.5	36.8	Peroxisome	Peroxisomal targeting signal							69319.XP_008553166.1	2.47e-148	429	COG3648@1|root,KOG1599@2759|Eukaryota,38FJ4@33154|Opisthokonta,3BBA4@33208|Metazoa,3CS1C@33213|Bilateria,41V03@6656|Arthropoda,3SH53@50557|Insecta,46G45@7399|Hymenoptera	33208|Metazoa	Q	Catalyzes the oxidation of uric acid to 5- hydroxyisourate, which is further processed to form (S)-allantoin	Uricase	UOX	GO:0000255,GO:0003674,GO:0003824,GO:0004846,GO:0005575,GO:0005622,GO:0005623,GO:0005737,GO:0005777,GO:0005782,GO:0005829,GO:0006082,GO:0006139,GO:0006144,GO:0006145,GO:0006725,GO:0006807,GO:0008150,GO:0008152,GO:0009056,GO:0009058,GO:0009112,GO:0009636,GO:0009987,GO:0010033,GO:0016043,GO:0016491,GO:0016661,GO:0016663,GO:0017144,GO:0018130,GO:0019428,GO:0019439,GO:0019628,GO:0022607,GO:0031907,GO:…	1.7.3.3	ko:K00365	K00365	uaZ	urate oxidase							ko00230,ko00232,ko01100,ko01120,map00230,map00232,map01100,map01120	M00546
1	8	Under	TRINITY_DN10897_c0_g1_i4	5027	TRINITY_DN10897_c0_g1_i4.p1	1113	complete	4	37.8554	1.98189	0.453498	4.37022	1.24121e-05	0.00107483	1.6	4.5	0.6	2.5	Cell membrane|Lysosome/Vacuole	Signal peptide|Transmembrane domain							136037.KDR08758	0	1773	KOG1934@1|root,KOG1934@2759|Eukaryota,38G4T@33154|Opisthokonta,3BFKR@33208|Metazoa,3CRC9@33213|Bilateria,41XIK@6656|Arthropoda,3SIUC@50557|Insecta	33208|Metazoa	S	Hedgehog receptor activity	Patched	daf-6	GO:0000003,GO:0000122,GO:0000278,GO:0000281,GO:0000910,GO:0003006,GO:0005575,GO:0005622,GO:0005623,GO:0005737,GO:0005886,GO:0006355,GO:0006357,GO:0007049,GO:0007275,GO:0007548,GO:0008150,GO:0009653,GO:0009889,GO:0009890,GO:0009892,GO:0009966,GO:0009987,GO:0010468,GO:0010556,GO:0010558,GO:0010605,GO:0010629,GO:0010646,GO:0012506,GO:0016020,GO:0018996,GO:0019219,GO:0019222,GO:0022402,GO:0022414,GO:…	-	-										-	-
1	9	Under	TRINITY_DN1119_c0_g1_i4	2679	TRINITY_DN1119_c0_g1_i4.p1	846	complete	933.4	72.1512	9.86643	1.40077	7.04359	1.87352e-12	8.10836e-10	0	19.8	0	20.7	Extracellular	Signal peptide							7029.ACYPI002825-PA	4.77e-188	571	COG2304@1|root,2QPS2@2759|Eukaryota,38C6V@33154|Opisthokonta,3BE0X@33208|Metazoa,3CW49@33213|Bilateria,41XXA@6656|Arthropoda,3SMD0@50557|Insecta,3EC3H@33342|Paraneoptera	33208|Metazoa	S	Vault protein inter-alpha-trypsin domain	ITI_HC_C,VIT,VWA,VWA_3	ITIH5	-	-	-										-	-
1	10	Under	TRINITY_DN11207_c0_g1_i1	1462	TRINITY_DN11207_c0_g1_i1.p1	269	5prime_partial	70.8	63.2122	6.14517	1.08671	5.65483	1.56004e-08	3.2508e-06	0.7	38.3	0.6	43.3	Extracellular	Signal peptide							136037.KDR14645	9.96e-163	457	28JQ8@1|root,2QS3I@2759|Eukaryota,39SXY@33154|Opisthokonta,3BD54@33208|Metazoa,3D488@33213|Bilateria,41YHU@6656|Arthropoda,3SKRT@50557|Insecta	33208|Metazoa	S	Chitin binding Peritrophin-A domain	CBM_14	Cpap3-a2	-	-	-										-	-
1	11	Under	TRINITY_DN1141_c0_g1_i15	2072	TRINITY_DN1141_c0_g1_i15.p1	461	complete	57	7.43976	5.83231	1.57714	3.69802	0.000217286	0.0102088	0.1	2.4	0.1	2.1	Cytoplasm	Nuclear localization signal							121225.PHUM561050-PA	6.38e-74	260	28NP2@1|root,2RTF2@2759|Eukaryota,39D76@33154|Opisthokonta,3CH6Q@33208|Metazoa,3DYPE@33213|Bilateria,42701@6656|Arthropoda,3SWRH@50557|Insecta,3EDJF@33342|Paraneoptera	33208|Metazoa	-	-	-	-	-	-	ko:K16479	K16479	ODF2	outer dense fiber protein 2							-	-
1	12	Under	TRINITY_DN1155_c0_g1_i6	3950	TRINITY_DN1155_c0_g1_i6.p1	485	complete	5.5	607.887	2.45388	0.668463	3.67092	0.000241674	0.0110772	24.5	85.2	6.3	50.8	Cytoplasm|Nucleus	Nuclear export signal							136037.KDR16679	3.16e-271	750	COG0019@1|root,KOG0622@2759|Eukaryota,38CIN@33154|Opisthokonta,3BDIS@33208|Metazoa,3CT3U@33213|Bilateria,41UBW@6656|Arthropoda,3SH2X@50557|Insecta	33208|Metazoa	E	Belongs to the Orn Lys Arg decarboxylase class-II family	Orn_Arg_deC_N,Orn_DAP_Arg_deC	-	GO:0003674,GO:0003824,GO:0004586,GO:0005575,GO:0005622,GO:0005623,GO:0005737,GO:0006082,GO:0006520,GO:0006576,GO:0006591,GO:0006595,GO:0006596,GO:0006807,GO:0008150,GO:0008152,GO:0009058,GO:0009308,GO:0009309,GO:0009445,GO:0009446,GO:0009987,GO:0016829,GO:0016830,GO:0016831,GO:0019752,GO:0033387,GO:0034641,GO:0042401,GO:0043436,GO:0044106,GO:0044237,GO:0044238,GO:0044249,GO:0044271,GO:0044281,GO:…	4.1.1.17	ko:K01581	K01581	E4.1.1.17, ODC1, speC, speF	ornithine decarboxylase							ko00330,ko00480,ko01100,ko01110,ko01130,map00330,map00480,map01100,map01110,map01130	M00134
1	13	Under	TRINITY_DN1180_c0_g1_i15	993	TRINITY_DN1180_c0_g1_i15.p1	242	complete	4.4	10.0654	2.12468	0.648909	3.27423	0.00105952	0.0327084	2.1	6.5	0.6	2.8	Nucleus	Nuclear localization signal							136037.KDR09064	3.01e-134	384	COG5648@1|root,KOG0381@2759|Eukaryota,3A3CM@33154|Opisthokonta,3BQTR@33208|Metazoa,3D7XA@33213|Bilateria,41ZCJ@6656|Arthropoda,3SMUZ@50557|Insecta	33208|Metazoa	K	DNA binding	HMG_box	-	-	-	ko:K11670,ko:K11680	K11670	TEPT, INO80F	TCF3 fusion partner	K11680	NHP10	non-histone protein 10				-	-
1	14	Under	TRINITY_DN122_c0_g1_i7	2410	TRINITY_DN122_c0_g1_i7.p1	578	complete	5.9	13.9099	2.55805	0.684099	3.7393	0.00018453	0.00908719	0.9	3.8	0.7	1.4	Cell membrane|Lysosome/Vacuole	Signal peptide|Transmembrane domain							136037.KDR17679	1.98e-71	239	2E9SJ@1|root,2SG3C@2759|Eukaryota,3AD65@33154|Opisthokonta,3BVQU@33208|Metazoa,3DC0B@33213|Bilateria,421PF@6656|Arthropoda,3SP6V@50557|Insecta	33208|Metazoa	-	-	SEFIR	-	-	-	-										-	-
1	15	Under	TRINITY_DN12569_c0_g1_i1	943	TRINITY_DN12569_c0_g1_i1.p1	127	complete	6.8	45.9301	2.76674	0.73962	3.74076	0.000183462	0.00905443	7.5	31.9	3.5	23	Extracellular	Signal peptide							136037.KDR19870	1.15e-82	244	2D68T@1|root,2S56I@2759|Eukaryota,3A5PK@33154|Opisthokonta,3BTE5@33208|Metazoa,3D9QS@33213|Bilateria,420A2@6656|Arthropoda,3SNYG@50557|Insecta	33208|Metazoa	O	Epidermal growth factor-like domain.	EGF	-	-	-	-										-	-
1	16	Under	TRINITY_DN1270_c0_g1_i4	3489	TRINITY_DN1270_c0_g1_i4.p1	530	complete	3.9	1008.61	1.95442	0.273994	7.13307	9.81527e-13	4.50801e-10	61.6	163.1	8.8	16.9	Cell membrane	Transmembrane domain							7370.XP_005174792.1	1.46e-211	615	KOG0254@1|root,KOG0254@2759|Eukaryota,38BKC@33154|Opisthokonta,3BCIB@33208|Metazoa,3CWVB@33213|Bilateria,41VXU@6656|Arthropoda,3SHHP@50557|Insecta,450SK@7147|Diptera	33208|Metazoa	P	facilitative transporter for trehalose. Does not transport maltose, sucrose or lactose. Mediates the bidirectional transfer of trehalose. Responsible for the transport of trehalose synthesized in the fat body and the incorporation of trehalose into other tissues that require a carbon source, thereby regulating trehalose levels in the hemolymph	Sugar_tr	Tret1	GO:0003674,GO:0005215,GO:0005351,GO:0005355,GO:0005402,GO:0005575,GO:0005623,GO:0005886,GO:0006810,GO:0006811,GO:0006812,GO:0008150,GO:0008324,GO:0008643,GO:0008645,GO:0015075,GO:0015077,GO:0015078,GO:0015144,GO:0015145,GO:0015149,GO:0015154,GO:0015157,GO:0015291,GO:0015293,GO:0015294,GO:0015295,GO:0015318,GO:0015574,GO:0015672,GO:0015749,GO:0015766,GO:0015771,GO:0015772,GO:0016020,GO:0022804,GO:…	-	ko:K08145,ko:K14258	K08145	SLC2A8, GLUT8	MFS transporter, SP family, solute carrier family 2 (facilitated glucose transporter), member 8	K14258	TRET1	facilitated trehalose transporter				-	-
1	17	Under	TRINITY_DN12960_c0_g1_i2	1820	TRINITY_DN12960_c0_g1_i2.p1	583	complete	20.9	30.7897	4.38716	0.751458	5.8382	5.27692e-09	1.26337e-06	0.8	11.5	0.6	4.9	Cell membrane	Transmembrane domain							136037.KDR18147	2.42e-294	818	KOG2532@1|root,KOG2532@2759|Eukaryota,3A214@33154|Opisthokonta,3BR90@33208|Metazoa,3D7KM@33213|Bilateria,41ZJK@6656|Arthropoda,3SMIF@50557|Insecta	33208|Metazoa	G	Major Facilitator Superfamily	MFS_1	-	-	-	ko:K08193	K08193	SLC17A	MFS transporter, ACS family, solute carrier family 17 (sodium-dependent inorganic phosphate cotransporter), other							-	-
1	18	Under	TRINITY_DN13087_c0_g1_i3	1212	TRINITY_DN13087_c0_g1_i3.p1	193	complete	3.8	13.205	1.91164	0.59185	3.22993	0.0012382	0.0367136	2.7	7	1.7	2.9	Cytoplasm|Nucleus	Nuclear export signal							136037.KDR03817	6.73e-98	299	28KYE@1|root,2QTF5@2759|Eukaryota,38X6E@33154|Opisthokonta,3BDPU@33208|Metazoa,3CUGY@33213|Bilateria	33208|Metazoa	T	PH domain	PH	PLEKHD1	-	-	-										-	-
1	19	Under	TRINITY_DN1326_c0_g1_i25	1457	TRINITY_DN1326_c0_g1_i25.p1	208	complete	132.3	10.1924	7.04773	1.7744	3.97189	7.13058e-05	0.004546	0	5.8	0	4.9	Nucleus	Nuclear localization signal							7029.ACYPI53579-PA	3.19e-58	192	2CW1B@1|root,2RTDF@2759|Eukaryota,39MVT@33154|Opisthokonta,3CPFB@33208|Metazoa,3DHRM@33213|Bilateria,421N0@6656|Arthropoda,3SRD0@50557|Insecta,3ECT3@33342|Paraneoptera	7029.ACYPI53579-PA|-	-	-	-	-	-	-	-										-	-
1	20	Under	TRINITY_DN1327_c1_g1_i21	2453	TRINITY_DN1327_c1_g1_i21.p2	161	complete	9.7	51.6864	3.27914	0.846422	3.87412	0.000107011	0.00620694	2.1	16.4	1.4	20.4	Cell membrane	Transmembrane domain							136037.KDR19246	1.29e-33	130	KOG0254@1|root,KOG0254@2759|Eukaryota,39XWY@33154|Opisthokonta,3BFI4@33208|Metazoa,3D5TT@33213|Bilateria,41XRW@6656|Arthropoda,3SIV1@50557|Insecta	33208|Metazoa	U	Facilitated trehalose transporter Tret1-like	Sugar_tr	-	-	-	ko:K08145	K08145	SLC2A8, GLUT8	MFS transporter, SP family, solute carrier family 2 (facilitated glucose transporter), member 8							-	-
1	21	Under	TRINITY_DN1327_c1_g1_i8	2683	TRINITY_DN1327_c1_g1_i8.p1	464	complete	12.9	121.504	3.69079	0.845201	4.36677	1.261e-05	0.00108316	3.4	35.7	1	40.7	Cell membrane	Transmembrane domain							136037.KDR19246	2.31e-132	398	KOG0254@1|root,KOG0254@2759|Eukaryota,39XWY@33154|Opisthokonta,3BFI4@33208|Metazoa,3D5TT@33213|Bilateria,41XRW@6656|Arthropoda,3SIV1@50557|Insecta	33208|Metazoa	U	Facilitated trehalose transporter Tret1-like	Sugar_tr	-	-	-	ko:K08145	K08145	SLC2A8, GLUT8	MFS transporter, SP family, solute carrier family 2 (facilitated glucose transporter), member 8							-	-
1	22	Under	TRINITY_DN1379_c0_g1_i6	3056	TRINITY_DN1379_c0_g1_i6.p1	358	complete	41.8	162.533	5.38557	0.673126	8.00083	1.2358e-15	1.06968e-12	1.4	40.8	1.2	29.4	Cell membrane	Transmembrane domain							136037.KDR09254	1.5e-186	526	28Z02@1|root,2R5U9@2759|Eukaryota,39YDD@33154|Opisthokonta,3BFFN@33208|Metazoa,3D4J4@33213|Bilateria,41YHY@6656|Arthropoda,3SKUV@50557|Insecta	33208|Metazoa	-	-	-	-	-	-	-										-	-
1	23	Under	TRINITY_DN1380_c0_g1_i1	996	TRINITY_DN1380_c0_g1_i1.p1	217	complete	4.3	136.907	2.09544	0.54329	3.85695	0.000114811	0.00649204	30.7	85.3	9.9	36.6	Cytoplasm								136037.KDR21201	1.2e-109	321	COG0225@1|root,KOG1635@2759|Eukaryota,39U04@33154|Opisthokonta,3BC3C@33208|Metazoa,3CZ0C@33213|Bilateria,41XWW@6656|Arthropoda,3SKYJ@50557|Insecta	33208|Metazoa	O	Peptide methionine sulfoxide	PMSR	-	-	1.8.4.11	ko:K07304	K07304	msrA	peptide-methionine (S)-S-oxide reductase							-	-
1	24	Under	TRINITY_DN1382_c0_g1_i1	5811	TRINITY_DN1382_c0_g1_i1.p1	506	complete	10.4	140.401	3.38105	0.969846	3.48617	0.00048999	0.0185956	2.1	18.5	0.6	23.6	Cell membrane|Lysosome/Vacuole	Transmembrane domain							136037.KDR22854	3.5e-247	691	KOG1558@1|root,KOG1558@2759|Eukaryota,39SSI@33154|Opisthokonta,3BI8J@33208|Metazoa,3D3V0@33213|Bilateria,429U1@6656|Arthropoda,3SKTH@50557|Insecta	33208|Metazoa	P	ZIP Zinc transporter	Zip	SLC39A3	-	-	ko:K14709	K14709	SLC39A1_2_3, ZIP1_2_3	solute carrier family 39 (zinc transporter), member 1/2/3							-	-
1	25	Under	TRINITY_DN1388_c1_g1_i11	1545	TRINITY_DN1388_c1_g1_i11.p1	104	complete	2.1	59.3493	1.05477	0.32488	3.24665	0.00116773	0.0350396	13.8	19.8	0.8	5	Cytoplasm|Nucleus	Nuclear localization signal							28377.ENSACAP00000022415	1.44e-29	115	2B1SQ@1|root,2S0B4@2759|Eukaryota,3A90V@33154|Opisthokonta,3CPFZ@33208|Metazoa,3E5M0@33213|Bilateria,48S72@7711|Chordata,49NPA@7742|Vertebrata	33208|Metazoa	-	-	DDE_3,DUF4817	-	-	-	-										-	-
1	26	Under	TRINITY_DN139_c0_g1_i35	1828	TRINITY_DN139_c0_g1_i35.p1	320	complete	6.2	101.767	2.63168	0.667995	3.93968	8.15917e-05	0.00507244	8.4	38.8	6.3	25.1	Cytoplasm|Nucleus	Nuclear localization signal							136037.KDR16365	3.78e-122	360	KOG4205@1|root,KOG4205@2759|Eukaryota,3AMG2@33154|Opisthokonta,3C09Q@33208|Metazoa,3DGSX@33213|Bilateria,41TX7@6656|Arthropoda,3SFZZ@50557|Insecta	33208|Metazoa	A	nucleic acid binding	RRM_1	-	GO:0000003,GO:0000184,GO:0000226,GO:0000375,GO:0000377,GO:0000398,GO:0000578,GO:0000785,GO:0000956,GO:0001667,GO:0002009,GO:0002064,GO:0002065,GO:0002066,GO:0003002,GO:0003006,GO:0003674,GO:0003676,GO:0003723,GO:0003729,GO:0003730,GO:0005488,GO:0005575,GO:0005622,GO:0005623,GO:0005634,GO:0005654,GO:0005694,GO:0005700,GO:0005703,GO:0005737,GO:0006139,GO:0006396,GO:0006397,GO:0006401,GO:0006402,GO:…	-	ko:K03102,ko:K14411	K03102	SQD	squid	K14411	MSI	RNA-binding protein Musashi				ko03015,ko04320,map03015,map04320	-
1	27	Under	TRINITY_DN14201_c0_g1_i10	2621	TRINITY_DN14201_c0_g1_i10.p1	688	complete	3	31.7921	1.59117	0.489422	3.25111	0.00114953	0.0347252	3.2	7.1	1.2	4.4	Extracellular	Signal peptide							136037.KDR23009	7.98e-234	696	KOG3594@1|root,KOG3594@2759|Eukaryota,38SH4@33154|Opisthokonta,3BKSF@33208|Metazoa,3CV38@33213|Bilateria,41X6P@6656|Arthropoda,3SH2B@50557|Insecta	33208|Metazoa	S	Cadherins are calcium-dependent cell adhesion proteins	Cadherin,Cadherin_C,Laminin_G_2	-	GO:0000003,GO:0000578,GO:0000902,GO:0000904,GO:0001654,GO:0001667,GO:0001700,GO:0001703,GO:0001736,GO:0001738,GO:0001745,GO:0001748,GO:0001763,GO:0001894,GO:0002009,GO:0002064,GO:0002065,GO:0002066,GO:0002165,GO:0002376,GO:0002520,GO:0003002,GO:0003006,GO:0003007,GO:0003151,GO:0003674,GO:0005488,GO:0005509,GO:0005515,GO:0005575,GO:0005622,GO:0005623,GO:0005737,GO:0005768,GO:0005886,GO:0005887,GO:…	-	-										-	-
1	28	Under	TRINITY_DN143_c0_g1_i1	2428	TRINITY_DN143_c0_g1_i1.p1	509	complete	82.7	6.4165	6.3696	1.84665	3.44928	0.00056209	0.020469	0	1.9	0	1.7	Endoplasmic reticulum	Signal peptide|Transmembrane domain							136037.KDR10939	6.39e-187	541	COG2124@1|root,KOG0158@2759|Eukaryota,38BTY@33154|Opisthokonta,3BF8S@33208|Metazoa,3D3J9@33213|Bilateria,41X57@6656|Arthropoda,3SZP8@50557|Insecta	33208|Metazoa	Q	Cytochrome P-450	p450	-	-	-	ko:K14999,ko:K15005	K14999	CYP6	cytochrome P450 family 6	K15005	CYP28	cytochrome P450 family 28				-	-
1	29	Under	TRINITY_DN14431_c1_g1_i2	599	TRINITY_DN14431_c1_g1_i2.p1	72	complete	3.4	36.478	1.77312	0.525149	3.37642	0.000734358	0.0250237	18.4	41.5	1.9	18.9	Endoplasmic reticulum	Signal peptide|Transmembrane domain							7260.FBpp0245084	9.94e-14	67.4	2E8FS@1|root,2SEY0@2759|Eukaryota,3ACFC@33154|Opisthokonta,3BVT0@33208|Metazoa,3DCJE@33213|Bilateria,421KJ@6656|Arthropoda,3SPCA@50557|Insecta,4543F@7147|Diptera,45YJA@7214|Drosophilidae	33208|Metazoa	S	obsolete signal transducer activity	DUF4512	-	-	-	-										-	-
1	30	Under	TRINITY_DN145_c0_g2_i2	6063	TRINITY_DN145_c0_g2_i2.p3	283	complete	2.9	67.0525	1.52556	0.392502	3.88676	0.000101593	0.00606457	2.9	5.7	1	0.8	Mitochondrion	Mitochondrial transit peptide							136037.KDR08896	4.41e-149	425	COG0491@1|root,KOG0814@2759|Eukaryota,38DEU@33154|Opisthokonta,3BACS@33208|Metazoa,3CRQJ@33213|Bilateria,41TRU@6656|Arthropoda,3SGTX@50557|Insecta	33208|Metazoa	S	Metallo-beta-lactamase superfamily	Lactamase_B	ETHE1	GO:0003674,GO:0003824,GO:0005488,GO:0005506,GO:0005575,GO:0005622,GO:0005623,GO:0005634,GO:0005654,GO:0005737,GO:0005739,GO:0005759,GO:0006518,GO:0006575,GO:0006749,GO:0006790,GO:0006807,GO:0008150,GO:0008152,GO:0009404,GO:0009987,GO:0016491,GO:0016701,GO:0016702,GO:0017144,GO:0019418,GO:0019748,GO:0031974,GO:0031981,GO:0034641,GO:0043167,GO:0043169,GO:0043226,GO:0043227,GO:0043229,GO:0043231,GO:…	1.13.11.18	ko:K17725	K17725	ETHE1	sulfur dioxygenase							ko00920,map00920	-
1	31	Under	TRINITY_DN14534_c0_g1_i2	2860	TRINITY_DN14534_c0_g1_i2.p1	779	complete	3.3	43.9138	1.70712	0.355069	4.80784	1.52568e-06	0.000189698	3.8	8.4	0.4	1.6	Cell membrane|Endoplasmic reticulum	Signal peptide|Transmembrane domain							136037.KDR20728	0	1078	2C49M@1|root,2QQ7Q@2759|Eukaryota,398D3@33154|Opisthokonta,3BF59@33208|Metazoa,3CRWN@33213|Bilateria,41WXM@6656|Arthropoda,3SGTV@50557|Insecta	33208|Metazoa	S	Protein of unknown function (DUF3522)	DUF3522	TMEM8A	GO:0005575,GO:0005623,GO:0005886,GO:0005887,GO:0007155,GO:0007160,GO:0007346,GO:0008150,GO:0009986,GO:0016020,GO:0016021,GO:0022610,GO:0031224,GO:0031226,GO:0031589,GO:0044425,GO:0044459,GO:0044464,GO:0050789,GO:0050794,GO:0051726,GO:0065007,GO:0071944	-	-										-	-
1	32	Under	TRINITY_DN14624_c0_g1_i37	3601	TRINITY_DN14624_c0_g1_i37.p1	851	complete	4.1	357.044	2.02401	0.445375	4.5445	5.50654e-06	0.000565623	20.4	57.8	5.7	27.2	Extracellular	Signal peptide							7029.ACYPI000928-PA	7.44e-186	561	COG2304@1|root,2QPS2@2759|Eukaryota,38C6V@33154|Opisthokonta,3BE0X@33208|Metazoa,3CW49@33213|Bilateria,41XXA@6656|Arthropoda,3SMD0@50557|Insecta,3EC3H@33342|Paraneoptera	33208|Metazoa	S	Vault protein inter-alpha-trypsin domain	ITI_HC_C,VIT,VWA,VWA_3	ITIH5	-	-	-										-	-
1	33	Under	TRINITY_DN14624_c0_g1_i7	2817	TRINITY_DN14624_c0_g1_i7.p1	835	complete	3.6	809.981	1.85365	0.451576	4.10484	4.04596e-05	0.00289982	65.8	164.1	16.7	83.2	Extracellular	Signal peptide							7029.ACYPI000928-PA	3.13e-183	554	COG2304@1|root,2QPS2@2759|Eukaryota,38C6V@33154|Opisthokonta,3BE0X@33208|Metazoa,3CW49@33213|Bilateria,41XXA@6656|Arthropoda,3SMD0@50557|Insecta,3EC3H@33342|Paraneoptera	33208|Metazoa	S	Vault protein inter-alpha-trypsin domain	ITI_HC_C,VIT,VWA,VWA_3	ITIH5	-	-	-										-	-
1	34	Under	TRINITY_DN14702_c0_g1_i2	959	TRINITY_DN14702_c0_g1_i2.p1	201	complete	3.1	20.5406	1.62785	0.435715	3.73606	0.000186928	0.00916519	6.2	13.5	2.3	3	Cytoplasm|Nucleus	Nuclear export signal							136037.KDR13576	2.66e-96	285	28Q1B@1|root,2QWQ2@2759|Eukaryota,38G10@33154|Opisthokonta,3BEHQ@33208|Metazoa,3CS8Q@33213|Bilateria,42A8Z@6656|Arthropoda,3SZQY@50557|Insecta	33208|Metazoa	S	COMM domain	COMM_domain	COMMD10	-	-	-										-	-
1	35	Under	TRINITY_DN14731_c0_g2_i1	2900	TRINITY_DN14731_c0_g2_i1.p1	892	complete	4.7	27.7259	2.24195	0.663073	3.38116	0.000721808	0.0248354	1.7	5.7	1.1	3	Cytoplasm|Nucleus	Nuclear export signal							132113.XP_003485646.1	0	905	KOG2390@1|root,KOG2390@2759|Eukaryota,38HEI@33154|Opisthokonta,3BAPD@33208|Metazoa,3CVA9@33213|Bilateria,41X5S@6656|Arthropoda,3SKTY@50557|Insecta,46FCF@7399|Hymenoptera	33208|Metazoa	S	Rab GTPase activator activity	Rab3-GTPase_cat	RAB3GAP1	GO:0001505,GO:0001654,GO:0001956,GO:0003008,GO:0003674,GO:0005085,GO:0005096,GO:0005488,GO:0005515,GO:0005575,GO:0005622,GO:0005623,GO:0005737,GO:0005783,GO:0005789,GO:0005794,GO:0005811,GO:0005829,GO:0006807,GO:0006810,GO:0006914,GO:0006996,GO:0007154,GO:0007165,GO:0007166,GO:0007267,GO:0007268,GO:0007275,GO:0007399,GO:0007417,GO:0007420,GO:0007423,GO:0008047,GO:0008104,GO:0008150,GO:0008152,GO:…	-	ko:K18270	K18270	RAB3GAP1	Rab3 GTPase-activating protein catalytic subunit							-	-
1	36	Under	TRINITY_DN1475_c0_g1_i1	2908	TRINITY_DN1475_c0_g1_i1.p1	438	complete	5	336.441	2.32843	0.550617	4.22876	2.34982e-05	0.00182354	20.1	76.7	5.9	56.8	Cytoplasm	Nuclear export signal							121225.PHUM345810-PA	3.35e-102	316	COG0666@1|root,KOG0504@2759|Eukaryota,38EYH@33154|Opisthokonta,3BM8A@33208|Metazoa,3CRRM@33213|Bilateria,41ZXU@6656|Arthropoda,3SMZY@50557|Insecta,3EDDA@33342|Paraneoptera	33208|Metazoa	S	Ankyrin repeat	Ank,Ank_2,Ank_3,Ank_4,Ank_5	NFKBIA	GO:0000003,GO:0000060,GO:0001889,GO:0002064,GO:0002065,GO:0002066,GO:0002218,GO:0002221,GO:0002224,GO:0002225,GO:0002237,GO:0002253,GO:0002376,GO:0002520,GO:0002682,GO:0002683,GO:0002684,GO:0002697,GO:0002699,GO:0002700,GO:0002702,GO:0002753,GO:0002757,GO:0002758,GO:0002759,GO:0002760,GO:0002764,GO:0002784,GO:0002788,GO:0002804,GO:0002805,GO:0002807,GO:0002810,GO:0002831,GO:0002833,GO:0002920,GO:…	-	ko:K04734,ko:K05872	K04734	NFKBIA	NF-kappa-B inhibitor alpha	K05872	NFKBIE	NF-kappa-B inhibitor epsilon				ko04024,ko04062,ko04064,ko04210,ko04380,ko04620,ko04621,ko04622,ko04623,ko04624,ko04657,ko04658,ko04659,ko04660,ko04662,ko04668,ko04722,ko04920,ko04926,ko04931,ko05120,ko05131,ko05134,ko05140,ko05142,ko05145,ko05160,ko05161,ko05162,ko05164,ko05166,ko05167,ko05168,ko05169,ko05200,ko05203,ko05215,ko05220,ko05222,map04024,map04062,map04064,map04210,map04380,map04620,map04621,map04622,map04623,map046…	M00686
1	37	Under	TRINITY_DN1475_c0_g1_i2	2119	TRINITY_DN1475_c0_g1_i2.p1	440	5prime_partial	5.6	146.643	2.47521	0.266775	9.2783	1.72208e-20	3.87554e-17	11.3	43.9	2.8	6.3	Cytoplasm	Nuclear export signal							121225.PHUM345810-PA	1.79e-102	317	COG0666@1|root,KOG0504@2759|Eukaryota,38EYH@33154|Opisthokonta,3BM8A@33208|Metazoa,3CRRM@33213|Bilateria,41ZXU@6656|Arthropoda,3SMZY@50557|Insecta,3EDDA@33342|Paraneoptera	33208|Metazoa	S	Ankyrin repeat	Ank,Ank_2,Ank_3,Ank_4,Ank_5	NFKBIA	GO:0000003,GO:0000060,GO:0001889,GO:0002064,GO:0002065,GO:0002066,GO:0002218,GO:0002221,GO:0002224,GO:0002225,GO:0002237,GO:0002253,GO:0002376,GO:0002520,GO:0002682,GO:0002683,GO:0002684,GO:0002697,GO:0002699,GO:0002700,GO:0002702,GO:0002753,GO:0002757,GO:0002758,GO:0002759,GO:0002760,GO:0002764,GO:0002784,GO:0002788,GO:0002804,GO:0002805,GO:0002807,GO:0002810,GO:0002831,GO:0002833,GO:0002920,GO:…	-	ko:K04734,ko:K05872	K04734	NFKBIA	NF-kappa-B inhibitor alpha	K05872	NFKBIE	NF-kappa-B inhibitor epsilon				ko04024,ko04062,ko04064,ko04210,ko04380,ko04620,ko04621,ko04622,ko04623,ko04624,ko04657,ko04658,ko04659,ko04660,ko04662,ko04668,ko04722,ko04920,ko04926,ko04931,ko05120,ko05131,ko05134,ko05140,ko05142,ko05145,ko05160,ko05161,ko05162,ko05164,ko05166,ko05167,ko05168,ko05169,ko05200,ko05203,ko05215,ko05220,ko05222,map04024,map04062,map04064,map04210,map04380,map04620,map04621,map04622,map04623,map046…	M00686
1	38	Under	TRINITY_DN1475_c0_g1_i4	2547	TRINITY_DN1475_c0_g1_i4.p1	456	5prime_partial	1319.5	101.894	10.3658	1.24576	8.32089	8.73027e-17	9.82373e-14	0	31.3	0	21	Cytoplasm	Nuclear export signal							121225.PHUM345810-PA	6.02e-102	316	COG0666@1|root,KOG0504@2759|Eukaryota,38EYH@33154|Opisthokonta,3BM8A@33208|Metazoa,3CRRM@33213|Bilateria,41ZXU@6656|Arthropoda,3SMZY@50557|Insecta,3EDDA@33342|Paraneoptera	33208|Metazoa	S	Ankyrin repeat	Ank,Ank_2,Ank_3,Ank_4,Ank_5	NFKBIA	GO:0000003,GO:0000060,GO:0001889,GO:0002064,GO:0002065,GO:0002066,GO:0002218,GO:0002221,GO:0002224,GO:0002225,GO:0002237,GO:0002253,GO:0002376,GO:0002520,GO:0002682,GO:0002683,GO:0002684,GO:0002697,GO:0002699,GO:0002700,GO:0002702,GO:0002753,GO:0002757,GO:0002758,GO:0002759,GO:0002760,GO:0002764,GO:0002784,GO:0002788,GO:0002804,GO:0002805,GO:0002807,GO:0002810,GO:0002831,GO:0002833,GO:0002920,GO:…	-	ko:K04734,ko:K05872	K04734	NFKBIA	NF-kappa-B inhibitor alpha	K05872	NFKBIE	NF-kappa-B inhibitor epsilon				ko04024,ko04062,ko04064,ko04210,ko04380,ko04620,ko04621,ko04622,ko04623,ko04624,ko04657,ko04658,ko04659,ko04660,ko04662,ko04668,ko04722,ko04920,ko04926,ko04931,ko05120,ko05131,ko05134,ko05140,ko05142,ko05145,ko05160,ko05161,ko05162,ko05164,ko05166,ko05167,ko05168,ko05169,ko05200,ko05203,ko05215,ko05220,ko05222,map04024,map04062,map04064,map04210,map04380,map04620,map04621,map04622,map04623,map046…	M00686
1	39	Under	TRINITY_DN148_c0_g1_i95	3673	TRINITY_DN148_c0_g1_i95.p1	259	complete	3.7	77.8688	1.87603	0.267482	7.01367	2.32141e-12	9.6747e-10	4.7	12.4	0.7	4.3	Cell membrane|Lysosome/Vacuole|Golgi apparatus	Signal peptide|Transmembrane domain							136037.KDR08421	3.51e-133	382	KOG1619@1|root,KOG1619@2759|Eukaryota,39T0N@33154|Opisthokonta,3BD2H@33208|Metazoa,3CRB0@33213|Bilateria,41WZ4@6656|Arthropoda,3SGFR@50557|Insecta	33208|Metazoa	P	Cytochrome b-561 / ferric reductase transmembrane domain.	Cytochrom_B561	CYBRD1	GO:0000293,GO:0000323,GO:0001505,GO:0003008,GO:0003674,GO:0003824,GO:0005575,GO:0005622,GO:0005623,GO:0005737,GO:0005764,GO:0005765,GO:0005773,GO:0005774,GO:0005886,GO:0005903,GO:0006873,GO:0006875,GO:0006879,GO:0007610,GO:0007611,GO:0007613,GO:0007626,GO:0008150,GO:0008152,GO:0009987,GO:0010035,GO:0010038,GO:0010039,GO:0010646,GO:0016020,GO:0016491,GO:0016722,GO:0016723,GO:0019725,GO:0023051,GO:…	1.16.5.1	ko:K08360,ko:K08370	K08360	CYB561	cytochrome b-561	K08370	CYBRD1, Dcytb	cytochrome b reductase 1				ko04978,map04978	-
1	40	Under	TRINITY_DN1498_c1_g1_i2	2174	TRINITY_DN1498_c1_g1_i2.p1	154	complete	4.8	68.7905	2.27603	0.369309	6.16295	7.14025e-10	2.06015e-07	5.8	19.2	1.6	2.9	Cytoplasm								136037.KDR23538	1.85e-68	214	KOG3002@1|root,KOG3002@2759|Eukaryota,3AP4M@33154|Opisthokonta,3C132@33208|Metazoa,3DB11@33213|Bilateria,422QR@6656|Arthropoda,3SPKU@50557|Insecta	33208|Metazoa	O	E3 ubiquitin-protein ligase that mediates ubiquitination and subsequent proteasomal degradation of target proteins. E3 ubiquitin ligases accept ubiquitin from an E2 ubiquitin- conjugating enzyme in the form of a thioester and then directly transfers the ubiquitin to targeted substrates	Sina	-	-	2.3.2.27	ko:K04506	K04506	SIAH1	E3 ubiquitin-protein ligase SIAH1							ko04013,ko04115,ko04120,ko04310,map04013,map04115,map04120,map04310	-
1	41	Under	TRINITY_DN1498_c1_g1_i22	1906	TRINITY_DN1498_c1_g1_i22.p1	279	complete	4.3	384.447	2.09322	0.637611	3.28291	0.0010274	0.0320033	41	113.3	18.6	56.5	Cytoplasm|Nucleus	Nuclear localization signal							136037.KDR23538	2.77e-127	369	KOG3002@1|root,KOG3002@2759|Eukaryota,3AP4M@33154|Opisthokonta,3C132@33208|Metazoa,3DB11@33213|Bilateria,422QR@6656|Arthropoda,3SPKU@50557|Insecta	33208|Metazoa	O	E3 ubiquitin-protein ligase that mediates ubiquitination and subsequent proteasomal degradation of target proteins. E3 ubiquitin ligases accept ubiquitin from an E2 ubiquitin- conjugating enzyme in the form of a thioester and then directly transfers the ubiquitin to targeted substrates	Sina	-	-	2.3.2.27	ko:K04506	K04506	SIAH1	E3 ubiquitin-protein ligase SIAH1							ko04013,ko04115,ko04120,ko04310,map04013,map04115,map04120,map04310	-
1	42	Under	TRINITY_DN1551_c0_g1_i1	892	TRINITY_DN1551_c0_g1_i1.p1	97	complete	2.4	116.362	1.26548	0.357764	3.5372	0.000404391	0.0161362	46	78.3	13.2	24.6	Cytoplasm|Nucleus	Nuclear export signal							7668.SPU_006560-tr	2.84e-17	79.7	2CXRP@1|root,2RZ9M@2759|Eukaryota,3A84X@33154|Opisthokonta,3BTAV@33208|Metazoa,3DA4U@33213|Bilateria	33208|Metazoa	S	DDE superfamily endonuclease	DDE_3,HTH_38,HTH_Tnp_Tc3_1,HTH_Tnp_Tc3_2	-	GO:0005575,GO:0005622,GO:0005623,GO:0005634,GO:0043226,GO:0043227,GO:0043229,GO:0043231,GO:0044424,GO:0044464	-	-										-	-
1	43	Under	TRINITY_DN1587_c0_g1_i1	488	TRINITY_DN1587_c0_g1_i1.p1	120	5prime_partial	3.4	35.0133	1.7795	0.52766	3.37244	0.000745065	0.025222	23.6	52.7	3.5	21.8	Mitochondrion								136037.KDR12405	6.35e-65	199	2CGVT@1|root,2S8GT@2759|Eukaryota,3A950@33154|Opisthokonta,3BUZ6@33208|Metazoa,3DBHU@33213|Bilateria,421DN@6656|Arthropoda,3SP4K@50557|Insecta	33208|Metazoa	C	NADH dehydrogenase (ubiquinone) activity	NDUF_B4	-	GO:0003674,GO:0003824,GO:0003954,GO:0005575,GO:0005622,GO:0005623,GO:0005737,GO:0005739,GO:0005740,GO:0005743,GO:0005746,GO:0005747,GO:0006091,GO:0006119,GO:0006120,GO:0006139,GO:0006163,GO:0006725,GO:0006753,GO:0006793,GO:0006796,GO:0006807,GO:0008150,GO:0008152,GO:0009117,GO:0009123,GO:0009126,GO:0009141,GO:0009144,GO:0009150,GO:0009161,GO:0009167,GO:0009199,GO:0009205,GO:0009259,GO:0009987,GO:…	-	ko:K03960	K03960	NDUFB4	NADH dehydrogenase (ubiquinone) 1 beta subcomplex subunit 4							ko00190,ko01100,ko04714,ko04723,ko04932,ko05010,ko05012,ko05016,map00190,map01100,map04714,map04723,map04932,map05010,map05012,map05016	M00147
1	44	Under	TRINITY_DN1605_c0_g1_i5	1576	TRINITY_DN1605_c0_g1_i5.p1	259	complete	3.7	86.3655	1.88221	0.564668	3.33331	0.000858198	0.0279101	12.7	30.8	4.4	13	Endoplasmic reticulum	Signal peptide							34740.HMEL014936-PA	6.37e-78	246	COG5052@1|root,KOG1726@2759|Eukaryota,38C6K@33154|Opisthokonta,3BFVN@33208|Metazoa,3D31W@33213|Bilateria,41U2D@6656|Arthropoda,3SHA5@50557|Insecta,443J0@7088|Lepidoptera	33208|Metazoa	V	TB2/DP1, HVA22 family	TB2_DP1_HVA22	REEP2	GO:0001664,GO:0003008,GO:0003674,GO:0005102,GO:0005488,GO:0005515,GO:0005575,GO:0005622,GO:0005623,GO:0005737,GO:0005783,GO:0005789,GO:0005856,GO:0005874,GO:0005881,GO:0005886,GO:0005887,GO:0006810,GO:0006886,GO:0006950,GO:0006996,GO:0007029,GO:0007600,GO:0007606,GO:0008104,GO:0008150,GO:0009987,GO:0010256,GO:0012505,GO:0015031,GO:0015630,GO:0015833,GO:0016020,GO:0016021,GO:0016043,GO:0031224,GO:…	-	ko:K17338	K17338	REEP1_2_3_4	receptor expression-enhancing protein 1/2/3/4							-	-
1	45	Under	TRINITY_DN1648_c0_g1_i4	3804	TRINITY_DN1648_c0_g1_i4.p1	283	5prime_partial	456.4	35.4462	8.83424	1.25295	7.05075	1.77957e-12	7.85281e-10	0	6.2	0	2.9	Mitochondrion	Mitochondrial transit peptide							136037.KDR08564	4.2e-176	493	KOG2883@1|root,KOG2883@2759|Eukaryota,38GMI@33154|Opisthokonta,3BH7N@33208|Metazoa,3CUAF@33213|Bilateria,41V5Q@6656|Arthropoda,3SK4Y@50557|Insecta	33208|Metazoa	S	NIPSNAP	NIPSNAP	NIPSNAP1	GO:0003008,GO:0003674,GO:0005488,GO:0005575,GO:0005622,GO:0005623,GO:0005737,GO:0005739,GO:0005740,GO:0005741,GO:0005886,GO:0006091,GO:0006119,GO:0006139,GO:0006163,GO:0006164,GO:0006725,GO:0006753,GO:0006754,GO:0006793,GO:0006796,GO:0006807,GO:0007600,GO:0008150,GO:0008152,GO:0009058,GO:0009117,GO:0009123,GO:0009124,GO:0009126,GO:0009127,GO:0009141,GO:0009142,GO:0009144,GO:0009145,GO:0009150,GO:…	3.1.3.18,3.1.3.48	ko:K19269	K19269	PGP, PGLP	phosphoglycolate phosphatase							ko00630,ko01100,ko01110,ko01130,ko01200,map00630,map01100,map01110,map01130,map01200	M00532
1	46	Under	TRINITY_DN165_c0_g1_i1	854	TRINITY_DN165_c0_g1_i1.p1	129	complete	16.2	39.4773	4.01727	0.54076	7.42895	1.09466e-13	6.65821e-11	3.2	36.4	0.3	15.2	Cytoplasm	Peroxisomal targeting signal							136037.KDR12490	1.38e-54	175	COG0607@1|root,KOG1530@2759|Eukaryota,3A884@33154|Opisthokonta,3BUJ0@33208|Metazoa,3DARJ@33213|Bilateria,4213P@6656|Arthropoda,3SPBM@50557|Insecta	33208|Metazoa	P	Heat shock protein	Rhodanese	TSTD3	-	2.8.1.1,2.8.1.2	ko:K01011	K01011	TST, MPST, sseA	thiosulfate/3-mercaptopyruvate sulfurtransferase							ko00270,ko00920,ko01100,ko01120,ko04122,map00270,map00920,map01100,map01120,map04122	-
1	47	Under	TRINITY_DN16734_c0_g2_i6	5271	TRINITY_DN16734_c0_g2_i6.p1	212	complete	3	557.45	1.59032	0.386213	4.11773	3.82616e-05	0.00276859	26.8	56.6	8.7	15.7	Cytoplasm|Nucleus	Nuclear export signal							136037.KDR06415	4.85e-121	354	2CC0V@1|root,2RCQ7@2759|Eukaryota,39SR1@33154|Opisthokonta,3BFND@33208|Metazoa,3CRCC@33213|Bilateria,41UR0@6656|Arthropoda,3SIUA@50557|Insecta	33208|Metazoa	-	-	-	-	GO:0008150,GO:0030431,GO:0032501	-	-										-	-
1	48	Under	TRINITY_DN16826_c0_g1_i2	3115	TRINITY_DN16826_c0_g1_i2.p1	218	complete	2.9	83.8157	1.52321	0.465478	3.27236	0.00106655	0.0328805	7.3	15.7	0.9	10.7	Cytoplasm|Cell membrane	Nuclear localization signal							136037.KDR21842	9.05e-154	432	COG1100@1|root,KOG0070@2759|Eukaryota,38Q89@33154|Opisthokonta,3BDWZ@33208|Metazoa,3D0X0@33213|Bilateria,41VED@6656|Arthropoda,3SKA6@50557|Insecta	33208|Metazoa	U	GTP binding. It is involved in the biological process described with small GTPase mediated signal transduction	Arf	ARL4C	GO:0000166,GO:0001882,GO:0001883,GO:0003674,GO:0003824,GO:0003924,GO:0005488,GO:0005515,GO:0005525,GO:0005575,GO:0005622,GO:0005623,GO:0005634,GO:0005737,GO:0005829,GO:0005886,GO:0006810,GO:0008092,GO:0008150,GO:0015631,GO:0016020,GO:0016192,GO:0016197,GO:0016462,GO:0016787,GO:0016817,GO:0016818,GO:0017076,GO:0017111,GO:0019001,GO:0030175,GO:0032153,GO:0032154,GO:0032155,GO:0032456,GO:0032549,GO:…	-	ko:K07945	K07945	ARL4	ADP-ribosylation factor-like protein 4							-	-
1	49	Under	TRINITY_DN1683_c1_g1_i4	3020	TRINITY_DN1683_c1_g1_i4.p1	620	complete	2.1	82.1115	1.0973	0.32327	3.39438	0.000687834	0.0240736	9.1	13.5	2.9	2.7	Cytoplasm								136037.KDR23893	1.86e-117	364	KOG0118@1|root,KOG0118@2759|Eukaryota,39UM8@33154|Opisthokonta,3BEMJ@33208|Metazoa,3CZ6F@33213|Bilateria,41ZVW@6656|Arthropoda,3SNEU@50557|Insecta	33208|Metazoa	A	nucleic acid binding	RRM_1	BOLL	GO:0000003,GO:0003674,GO:0003676,GO:0003723,GO:0003729,GO:0003730,GO:0005488,GO:0005575,GO:0005622,GO:0005623,GO:0005634,GO:0005737,GO:0006417,GO:0006446,GO:0007049,GO:0007276,GO:0007283,GO:0007610,GO:0007617,GO:0007618,GO:0008150,GO:0008315,GO:0008494,GO:0009889,GO:0009891,GO:0009892,GO:0009893,GO:0009894,GO:0009895,GO:0009987,GO:0010468,GO:0010556,GO:0010557,GO:0010604,GO:0010605,GO:0010608,GO:…	-	-										-	-
1	50	Under	TRINITY_DN1709_c0_g1_i1	1277	TRINITY_DN1709_c0_g1_i1.p1	249	5prime_partial	2.6	52.6244	1.35224	0.432879	3.12384	0.00178506	0.0483713	13.2	23.7	1.3	10.7	Extracellular	Signal peptide							136037.KDR22099	1.46e-74	234	2CDJY@1|root,2SQBT@2759|Eukaryota,3AMH5@33154|Opisthokonta,3C0Y5@33208|Metazoa,3DGNU@33213|Bilateria,422I7@6656|Arthropoda,3SR9C@50557|Insecta	33208|Metazoa	S	Juvenile hormone binding protein domains in insects.	JHBP	-	-	-	-										-	-
1	51	Under	TRINITY_DN1756_c0_g1_i1	4346	TRINITY_DN1756_c0_g1_i1.p1	602	complete	254.5	118.012	7.99152	1.99453	4.00671	6.15691e-05	0.00411736	0.1	20	0.2	28.4	Extracellular	Signal peptide							136037.KDR19978	1.53e-201	583	COG2303@1|root,KOG1238@2759|Eukaryota,38UEK@33154|Opisthokonta,3BXM2@33208|Metazoa,3DD9T@33213|Bilateria,42256@6656|Arthropoda,3SJ1U@50557|Insecta	33208|Metazoa	E	GMC oxidoreductase	GMC_oxred_C,GMC_oxred_N	-	-	1.1.3.49	ko:K21270	K21270	ChuaMOX	(R)-mandelonitrile oxidase							-	-
1	52	Under	TRINITY_DN1756_c0_g1_i12	4363	TRINITY_DN1756_c0_g1_i12.p1	602	complete	384.1	665.043	8.58522	2.02981	4.22958	2.34128e-05	0.0018232	0.4	138	0.5	244.2	Extracellular	Signal peptide							136037.KDR19978	1.53e-201	583	COG2303@1|root,KOG1238@2759|Eukaryota,38UEK@33154|Opisthokonta,3BXM2@33208|Metazoa,3DD9T@33213|Bilateria,42256@6656|Arthropoda,3SJ1U@50557|Insecta	33208|Metazoa	E	GMC oxidoreductase	GMC_oxred_C,GMC_oxred_N	-	-	1.1.3.49	ko:K21270	K21270	ChuaMOX	(R)-mandelonitrile oxidase							-	-
1	53	Under	TRINITY_DN1756_c0_g1_i6	4994	TRINITY_DN1756_c0_g1_i6.p1	775	complete	9.4	120.315	3.23295	0.964147	3.35317	0.000798908	0.0265183	2.4	17.5	1.1	17.6	Extracellular	Signal peptide							136037.KDR19978	2.92e-199	583	COG2303@1|root,KOG1238@2759|Eukaryota,38UEK@33154|Opisthokonta,3BXM2@33208|Metazoa,3DD9T@33213|Bilateria,42256@6656|Arthropoda,3SJ1U@50557|Insecta	33208|Metazoa	E	GMC oxidoreductase	GMC_oxred_C,GMC_oxred_N	-	-	1.1.3.49	ko:K21270	K21270	ChuaMOX	(R)-mandelonitrile oxidase							-	-
1	54	Under	TRINITY_DN1756_c0_g1_i9	3381	TRINITY_DN1756_c0_g1_i9.p1	781	complete	178.5	1765.81	7.47992	1.77694	4.20943	2.56014e-05	0.00197882	3.1	451.9	2.2	614.7	Extracellular	Signal peptide							136037.KDR19978	3.55e-199	583	COG2303@1|root,KOG1238@2759|Eukaryota,38UEK@33154|Opisthokonta,3BXM2@33208|Metazoa,3DD9T@33213|Bilateria,42256@6656|Arthropoda,3SJ1U@50557|Insecta	33208|Metazoa	E	GMC oxidoreductase	GMC_oxred_C,GMC_oxred_N	-	-	1.1.3.49	ko:K21270	K21270	ChuaMOX	(R)-mandelonitrile oxidase							-	-
1	55	Under	TRINITY_DN17653_c0_g1_i2	774	TRINITY_DN17653_c0_g1_i2.p1	186	complete	11	7.57832	3.45404	0.802102	4.30623	1.66059e-05	0.0013443	1	7.8	0.5	3	Extracellular	Signal peptide							136037.KDR21757	3.61e-32	122	2E93Y@1|root,2SFHR@2759|Eukaryota,3AAH2@33154|Opisthokonta,3BV1N@33208|Metazoa,3DBKW@33213|Bilateria,423JQ@6656|Arthropoda,3SRS0@50557|Insecta	33208|Metazoa	S	C-type lectin (CTL) or carbohydrate-recognition domain (CRD)	Lectin_C	-	-	-	-										-	-
1	56	Under	TRINITY_DN1792_c0_g1_i21	1419	TRINITY_DN1792_c0_g1_i21.p1	308	complete	20.6	101.009	4.36229	0.741227	5.88523	3.97508e-09	9.9399e-07	3.7	60.6	2.1	69.2	Mitochondrion|Endoplasmic reticulum	Signal peptide|Transmembrane domain							136037.KDR08112	1.61e-137	395	COG0778@1|root,KOG3936@2759|Eukaryota,38BQ5@33154|Opisthokonta,3BIBD@33208|Metazoa,3CTQN@33213|Bilateria,41V3T@6656|Arthropoda,3SKU7@50557|Insecta	33208|Metazoa	C	Oxidoreductase activity	Nitroreductase	IYD	GO:0000166,GO:0003674,GO:0003824,GO:0004447,GO:0004601,GO:0005488,GO:0005575,GO:0005622,GO:0005623,GO:0005634,GO:0005654,GO:0005737,GO:0005886,GO:0005887,GO:0006082,GO:0006520,GO:0006570,GO:0006575,GO:0006725,GO:0006807,GO:0008150,GO:0008152,GO:0009072,GO:0009636,GO:0009987,GO:0010181,GO:0010817,GO:0012506,GO:0016020,GO:0016021,GO:0016209,GO:0016491,GO:0016684,GO:0018958,GO:0019752,GO:0030659,GO:…	1.21.1.1	ko:K17231	K17231	IYD, DEHAL1	iodotyrosine deiodinase							ko04918,map04918	-
1	57	Under	TRINITY_DN1805_c0_g1_i12	2444	TRINITY_DN1805_c0_g1_i12.p1	775	5prime_partial	73.8	5.72533	6.20475	1.52407	4.07117	4.67772e-05	0.00328975	0	1.7	0	1.3	Cell membrane	Signal peptide|Transmembrane domain							136037.KDR08103	1.21e-155	478	KOG1226@1|root,KOG1226@2759|Eukaryota,38DSI@33154|Opisthokonta,3BA6T@33208|Metazoa,3CTSN@33213|Bilateria,4221G@6656|Arthropoda,3SQHI@50557|Insecta	33208|Metazoa	TW	Integrin_B_tail	EGF_2,Integrin_B_tail,Integrin_b_cyt,Integrin_beta,PSI_integrin	ITGB1	GO:0000003,GO:0000082,GO:0000278,GO:0000902,GO:0000904,GO:0001505,GO:0001525,GO:0001540,GO:0001568,GO:0001667,GO:0001669,GO:0001701,GO:0001704,GO:0001706,GO:0001707,GO:0001708,GO:0001726,GO:0001774,GO:0001775,GO:0001846,GO:0001848,GO:0001851,GO:0001894,GO:0001932,GO:0001934,GO:0001936,GO:0001938,GO:0001944,GO:0001952,GO:0001954,GO:0001968,GO:0002020,GO:0002040,GO:0002042,GO:0002064,GO:0002218,GO:…	-	ko:K05719,ko:K06464,ko:K06493,ko:K09884	K05719	ITGB1, CD29	integrin beta 1	K06464	ITGB2, CD18	integrin beta 2	K06493	K09884		ko04015,ko04145,ko04151,ko04360,ko04380,ko04390,ko04510,ko04512,ko04514,ko04530,ko04610,ko04611,ko04640,ko04650,ko04670,ko04810,ko04919,ko05100,ko05130,ko05131,ko05133,ko05134,ko05140,ko05144,ko05145,ko05146,ko05150,ko05152,ko05165,ko05166,ko05200,ko05205,ko05206,ko05222,ko05323,ko05410,ko05412,ko05414,ko05416,ko05418,map04015,map04145,map04151,map04360,map04380,map04390,map04510,map04512,map0451…	-
1	58	Under	TRINITY_DN1811_c0_g1_i1	1965	TRINITY_DN1811_c0_g1_i1.p1	333	complete	13.2	395.242	3.72529	0.655402	5.68399	1.3159e-08	2.79381e-06	15.2	128.9	4.8	72.8	Extracellular	Signal peptide							132113.XP_003490300.1	1.14e-53	186	28N19@1|root,2RYX8@2759|Eukaryota,3AMA2@33154|Opisthokonta,3C0IR@33208|Metazoa,3DH0B@33213|Bilateria,422K7@6656|Arthropoda,3SR4N@50557|Insecta,46KNB@7399|Hymenoptera	33208|Metazoa	W	Lipase	Lipase	-	GO:0003674,GO:0003824,GO:0006629,GO:0008150,GO:0008152,GO:0009056,GO:0016042,GO:0016298,GO:0016787,GO:0016788,GO:0044238,GO:0071704,GO:1901575	-	-										-	-
1	59	Under	TRINITY_DN18792_c0_g1_i1	4691	TRINITY_DN18792_c0_g1_i1.p1	1218	complete	5.4	198.576	2.44406	0.55037	4.44076	8.96402e-06	0.00084408	6.7	23.6	0.4	13	Nucleus	Nuclear localization signal							7739.XP_002599456.1	4.37e-83	280	KOG2660@1|root,KOG2660@2759|Eukaryota,38D4I@33154|Opisthokonta,3BJ4N@33208|Metazoa,3CRWB@33213|Bilateria,483WW@7711|Chordata	33208|Metazoa	O	histone H2A-K119 monoubiquitination	RAWUL,zf-C3HC4_2	BMI1	GO:0000122,GO:0000151,GO:0000152,GO:0000785,GO:0000792,GO:0000976,GO:0000977,GO:0000978,GO:0000987,GO:0001012,GO:0001067,GO:0001501,GO:0001701,GO:0002376,GO:0002520,GO:0002682,GO:0002684,GO:0002694,GO:0002696,GO:0003002,GO:0003674,GO:0003676,GO:0003677,GO:0003682,GO:0003690,GO:0005488,GO:0005515,GO:0005575,GO:0005622,GO:0005623,GO:0005634,GO:0005654,GO:0005694,GO:0005737,GO:0005829,GO:0006139,GO:…	-	ko:K11459	K11459	PCGF4, BMI1	polycomb group RING finger protein 4							ko04550,ko05202,ko05206,map04550,map05202,map05206	-
1	60	Under	TRINITY_DN1942_c10_g1_i1	2816	TRINITY_DN1942_c10_g1_i1.p1	598	complete	24.5	22.697	4.61299	0.964345	4.78355	1.7223e-06	0.000210654	0.3	5.2	0.2	3.7	Nucleus	Nuclear localization signal							7029.ACYPI064813-PA	6.93e-150	473	KOG1075@1|root,KOG1075@2759|Eukaryota	2759|Eukaryota	E	Ribonuclease H protein	Exo_endo_phos_2,RNase_H,RVT_1	-	-	-	-										-	-
1	61	Under	TRINITY_DN1958_c0_g1_i2	637	TRINITY_DN1958_c0_g1_i2.p1	150	complete	21.3	17.5647	4.40968	1.23912	3.55873	0.000372655	0.015111	1.7	23.5	3.4	13.6	Cytoplasm|Nucleus	Nuclear localization signal							136037.KDR23279	2.31e-91	268	COG0198@1|root,KOG3401@2759|Eukaryota,3A3EZ@33154|Opisthokonta,3BHRB@33208|Metazoa,3CSYU@33213|Bilateria,41Z26@6656|Arthropoda,3SM49@50557|Insecta	33208|Metazoa	J	Structural constituent of ribosome. It is involved in the biological process described with	KOW,Ribosomal_L26	rpl26l1	GO:0002181,GO:0003674,GO:0003676,GO:0003723,GO:0003735,GO:0005198,GO:0005488,GO:0005575,GO:0005622,GO:0005623,GO:0005737,GO:0005829,GO:0005840,GO:0006412,GO:0006518,GO:0006807,GO:0008150,GO:0008152,GO:0009058,GO:0009059,GO:0009987,GO:0010467,GO:0015934,GO:0019538,GO:0022613,GO:0022625,GO:0022626,GO:0032991,GO:0034641,GO:0034645,GO:0042254,GO:0042273,GO:0043043,GO:0043170,GO:0043226,GO:0043228,GO:…	-	ko:K02898	K02898	RP-L26e, RPL26	large subunit ribosomal protein L26e							ko03010,map03010	M00177
1	62	Under	TRINITY_DN19586_c0_g3_i1	1723	TRINITY_DN19586_c0_g3_i1.p1	456	complete	128.4	9.96872	7.00462	1.93997	3.61069	0.000305385	0.0130024	0	3.9	0	3.5	Extracellular	Signal peptide							7460.GB49270-PA	2.29e-155	455	KOG4306@1|root,KOG4306@2759|Eukaryota,39ZPT@33154|Opisthokonta,3BNS7@33208|Metazoa,3D6I8@33213|Bilateria,41Y9B@6656|Arthropoda,3SKY6@50557|Insecta,46KTM@7399|Hymenoptera	33208|Metazoa	T	Phosphoric diester hydrolase activity. It is involved in the biological process described with lipid metabolic process	Varsurf_PPLC	-	-	-	-										-	-
1	63	Under	TRINITY_DN196_c0_g1_i1	1447	TRINITY_DN196_c0_g1_i1.p1	352	complete	6.5	230.529	2.70102	0.677895	3.98442	6.76445e-05	0.00437454	23.3	106.6	15	67.7	Extracellular	Signal peptide							136037.KDR23359	2.97e-86	271	KOG1339@1|root,KOG1339@2759|Eukaryota,38D42@33154|Opisthokonta,3BBEX@33208|Metazoa,3CZ8C@33213|Bilateria,41UZN@6656|Arthropoda,3SJBA@50557|Insecta	33208|Metazoa	O	aspartic-type endopeptidase activity. It is involved in the biological process described with proteolysis	Asp	-	GO:0003674,GO:0003824,GO:0004175,GO:0004190,GO:0006508,GO:0006807,GO:0008150,GO:0008152,GO:0008233,GO:0009056,GO:0009057,GO:0016787,GO:0019538,GO:0030163,GO:0043170,GO:0044238,GO:0070001,GO:0070011,GO:0071704,GO:0140096,GO:1901564,GO:1901565,GO:1901575	3.4.23.5	ko:K01379	K01379	CTSD	cathepsin D							ko04071,ko04140,ko04142,ko04210,ko04915,ko05152,map04071,map04140,map04142,map04210,map04915,map05152	-
1	64	Under	TRINITY_DN2_c0_g1_i32	3901	TRINITY_DN2_c0_g1_i32.p1	899	complete	3.2	89.472	1.65978	0.487971	3.40138	0.000670455	0.0235392	5.7	11.9	2	3.4	Lysosome/Vacuole	Signal peptide|Transmembrane domain							136037.KDR13896	0	1385	COG1501@1|root,KOG1065@2759|Eukaryota,38C67@33154|Opisthokonta,3BEJJ@33208|Metazoa,3CRZT@33213|Bilateria,41XXE@6656|Arthropoda,3SFN3@50557|Insecta	33208|Metazoa	G	Hydrolase activity, hydrolyzing O-glycosyl compounds. It is involved in the biological process described with carbohydrate metabolic process	Glyco_hydro_31	-	-	-	-										-	-
1	65	Under	TRINITY_DN201_c0_g1_i2	1216	TRINITY_DN201_c0_g1_i2.p1	352	complete	94.6	7.35696	6.56365	1.92108	3.41665	0.000633958	0.0226105	0	4.3	0	3.5	Cytoplasm	Nuclear localization signal							136037.KDR20240	4.39e-179	507	COG1063@1|root,KOG0024@2759|Eukaryota,38I3Q@33154|Opisthokonta,3BJTS@33208|Metazoa,3D3BV@33213|Bilateria,41W4R@6656|Arthropoda,3SJB0@50557|Insecta	33208|Metazoa	Q	Alcohol dehydrogenase GroES-like domain	ADH_N,ADH_zinc_N,Glu_dehyd_C	-	-	1.1.1.407	ko:K21616	K21616	znd	D-altritol 5-dehydrogenase							-	-
1	66	Under	TRINITY_DN2078_c0_g1_i4	1705	TRINITY_DN2078_c0_g1_i4.p1	246	complete	112.7	8.71696	6.81593	1.78752	3.81307	0.000137254	0.00725093	0	3.8	0	2.7	Mitochondrion	Peroxisomal targeting signal							136037.KDR10484	1.75e-118	345	2CA9R@1|root,2QR9T@2759|Eukaryota,3A03B@33154|Opisthokonta,3BT72@33208|Metazoa,3D9HV@33213|Bilateria,420V2@6656|Arthropoda,3SNT9@50557|Insecta	33208|Metazoa	S	regulation of MAPK cascade	-	-	GO:0001932,GO:0001933,GO:0005575,GO:0005576,GO:0005615,GO:0006355,GO:0008150,GO:0009889,GO:0009892,GO:0009966,GO:0009968,GO:0010468,GO:0010556,GO:0010563,GO:0010605,GO:0010646,GO:0010648,GO:0019219,GO:0019220,GO:0019222,GO:0023051,GO:0023057,GO:0031323,GO:0031324,GO:0031326,GO:0031399,GO:0031400,GO:0032268,GO:0032269,GO:0042325,GO:0042326,GO:0043408,GO:0043409,GO:0044421,GO:0045936,GO:0048519,GO:…	-	-										-	-
1	67	Under	TRINITY_DN2082_c0_g1_i1	2299	TRINITY_DN2082_c0_g1_i1.p1	574	complete	15.5	10.6769	3.95103	1.0191	3.87699	0.000105758	0.00618205	0.3	3	0.2	2.3	Cell membrane|Lysosome/Vacuole	Transmembrane domain							136037.KDR18686	3.06e-52	185	COG4413@1|root,2QWSG@2759|Eukaryota,38FI1@33154|Opisthokonta,3BIRP@33208|Metazoa,3CREV@33213|Bilateria,420MD@6656|Arthropoda,3SRG5@50557|Insecta	33208|Metazoa	E	Urea transporter	UT	SLC14A2	GO:0001101,GO:0003674,GO:0005215,GO:0005488,GO:0005515,GO:0005575,GO:0005623,GO:0005886,GO:0006810,GO:0006950,GO:0008150,GO:0009414,GO:0009415,GO:0009628,GO:0010035,GO:0015204,GO:0015840,GO:0016020,GO:0016021,GO:0016324,GO:0019755,GO:0022857,GO:0031224,GO:0042221,GO:0042886,GO:0042887,GO:0044425,GO:0044459,GO:0044464,GO:0045177,GO:0050839,GO:0050896,GO:0051179,GO:0051234,GO:0055085,GO:0071702,GO:…	-	ko:K08716	K08716	SLC14A	solute carrier family 14 (urea transporter)							-	-
1	68	Under	TRINITY_DN2096_c2_g1_i1	1016	TRINITY_DN2096_c2_g1_i1.p1	158	complete	3.1	30.8429	1.61211	0.416715	3.86861	0.000109457	0.00629824	8.7	18.2	2.2	4.2	Cytoplasm|Nucleus	Nuclear export signal							136037.KDR06658	1.8e-69	214	COG2453@1|root,KOG1720@2759|Eukaryota,3A0SJ@33154|Opisthokonta,3BQPQ@33208|Metazoa,3DA1H@33213|Bilateria,420NE@6656|Arthropoda,3SP43@50557|Insecta	33208|Metazoa	V	Dual specificity phosphatase, catalytic domain	DSPc	DUSP23	GO:0003674,GO:0003824,GO:0004721,GO:0004722,GO:0004725,GO:0005575,GO:0005622,GO:0005623,GO:0005634,GO:0005654,GO:0005737,GO:0005829,GO:0006464,GO:0006470,GO:0006793,GO:0006796,GO:0006807,GO:0008138,GO:0008150,GO:0008152,GO:0009987,GO:0016311,GO:0016787,GO:0016788,GO:0016791,GO:0019538,GO:0031974,GO:0031981,GO:0035335,GO:0036211,GO:0042578,GO:0043170,GO:0043226,GO:0043227,GO:0043229,GO:0043231,GO:…	3.1.3.16,3.1.3.48	ko:K14165	K14165	K14165	atypical dual specificity phosphatase							-	-
1	69	Under	TRINITY_DN21015_c0_g1_i13	1852	TRINITY_DN21015_c0_g1_i13.p1	452	complete	2.6	176.83	1.35371	0.382871	3.53567	0.000406738	0.0161725	29.1	50	2.7	14.7	Cytoplasm								136037.KDR07556	1.68e-177	511	COG0213@1|root,2QPRY@2759|Eukaryota,38FQZ@33154|Opisthokonta,3BK8M@33208|Metazoa,3CTGB@33213|Bilateria,41VNI@6656|Arthropoda,3SJ4R@50557|Insecta	33208|Metazoa	G	Catalyzes the reversible phosphorolysis of thymidine. The produced molecules are then utilized as carbon and energy sources or in the rescue of pyrimidine bases for nucleotide synthesis	Glycos_trans_3N,Glycos_transf_3,PYNP_C	TYMP	GO:0000002,GO:0003674,GO:0003824,GO:0004645,GO:0005488,GO:0005515,GO:0005575,GO:0005622,GO:0005623,GO:0005737,GO:0005829,GO:0006139,GO:0006213,GO:0006725,GO:0006807,GO:0006935,GO:0006996,GO:0007005,GO:0007275,GO:0008150,GO:0008152,GO:0008655,GO:0009032,GO:0009056,GO:0009058,GO:0009116,GO:0009163,GO:0009164,GO:0009605,GO:0009653,GO:0009887,GO:0009987,GO:0010646,GO:0016043,GO:0016740,GO:0016757,GO:…	2.4.2.4	ko:K00758	K00758	deoA, TYMP	thymidine phosphorylase							ko00240,ko00983,ko01100,ko05219,map00240,map00983,map01100,map05219	-
1	70	Under	TRINITY_DN21021_c0_g1_i1	1830	TRINITY_DN21021_c0_g1_i1.p1	504	complete	2.6	275.091	1.388	0.309435	4.4856	7.27103e-06	0.000700423	45.1	83.8	4.5	32.3	Endoplasmic reticulum	Signal peptide|Transmembrane domain							136037.KDR11277	2.47e-185	535	COG2124@1|root,KOG0157@2759|Eukaryota,38CHP@33154|Opisthokonta,3B9GY@33208|Metazoa,3CSG8@33213|Bilateria,41U3I@6656|Arthropoda,3SGAE@50557|Insecta	33208|Metazoa	Q	cytochrome p450	p450	-	-	-	ko:K07427,ko:K15001	K07427	CYP4V	cytochrome P450 family 4 subfamily V	K15001	CYP4	cytochrome P450 family 4				-	-
1	71	Under	TRINITY_DN2146_c0_g1_i3	1172	TRINITY_DN2146_c0_g1_i3.p1	266	complete	14.5	76.6335	3.86231	0.494331	7.81319	5.57568e-15	4.18269e-12	4.8	46.6	1.4	12.6	Cytoplasm|Cell membrane	Nuclear export signal							136037.KDR08167	5.84e-165	497	COG5422@1|root,KOG4305@2759|Eukaryota,39V6N@33154|Opisthokonta,3BE3D@33208|Metazoa,3CYRJ@33213|Bilateria,41TU1@6656|Arthropoda,3SIPE@50557|Insecta	33208|Metazoa	T	Rho guanyl-nucleotide exchange factor activity. It is involved in the biological process described with regulation of Rho protein signal transduction	RhoGEF	-	GO:0000902,GO:0000904,GO:0002009,GO:0002165,GO:0003674,GO:0005085,GO:0005088,GO:0005089,GO:0005488,GO:0005515,GO:0005575,GO:0005622,GO:0005623,GO:0005737,GO:0005938,GO:0006928,GO:0006935,GO:0007275,GO:0007399,GO:0007409,GO:0007411,GO:0007424,GO:0007444,GO:0007478,GO:0007480,GO:0007552,GO:0007560,GO:0008150,GO:0009605,GO:0009653,GO:0009791,GO:0009886,GO:0009887,GO:0009888,GO:0009966,GO:0009967,GO:…	-	-										-	-
1	72	Under	TRINITY_DN2197_c0_g1_i3	1152	TRINITY_DN2197_c0_g1_i3.p1	317	5prime_partial	2.3	35.5557	1.21422	0.374957	3.23828	0.00120253	0.0359401	10.6	17	2.5	1.8	Cytoplasm	Nuclear localization signal|Nuclear export signal							136037.KDR12275	1.95e-15	83.2	COG0666@1|root,KOG0504@2759|Eukaryota,38FSA@33154|Opisthokonta,3BB34@33208|Metazoa,3D3K3@33213|Bilateria,422J7@6656|Arthropoda,3SR9F@50557|Insecta	33208|Metazoa	S	Ankyrin repeat	Ank,Ank_2,Ank_3,Ank_4	ANKRD16	-	-	-										-	-
1	73	Under	TRINITY_DN22022_c0_g2_i1	2650	TRINITY_DN22022_c0_g2_i1.p1	780	complete	19.6	35.8075	4.29633	0.522574	8.22148	2.01002e-16	2.05616e-13	0.7	9.5	0.5	2	Cell membrane	Signal peptide|Transmembrane domain							136037.KDR24400	0	906	KOG3762@1|root,KOG3762@2759|Eukaryota,38Z6F@33154|Opisthokonta,3BN7F@33208|Metazoa,3CRAU@33213|Bilateria,41V5E@6656|Arthropoda,3SG10@50557|Insecta	33208|Metazoa	S	MFS_1 like family	MFS_1_like	-	-	-	-										-	-
1	74	Under	TRINITY_DN2217_c0_g4_i3	3122	TRINITY_DN2217_c0_g4_i3.p1	798	complete	8.8	9.12173	3.14527	0.816452	3.85237	0.000116981	0.00654792	0.3	2	0.2	1.1	Cell membrane|Lysosome/Vacuole	Signal peptide|Transmembrane domain							13037.EHJ64083	2.6e-48	192	COG3590@1|root,KOG3624@2759|Eukaryota,38BNF@33154|Opisthokonta,3B9I2@33208|Metazoa,3CW8Q@33213|Bilateria,41W06@6656|Arthropoda,3SJ86@50557|Insecta,444HG@7088|Lepidoptera	33208|Metazoa	E	Peptidase family M13	Methyltransf_25,Peptidase_M13,Peptidase_M13_N	ECE2	GO:0000139,GO:0001666,GO:0001919,GO:0001921,GO:0001932,GO:0001990,GO:0003008,GO:0003013,GO:0003018,GO:0003044,GO:0003073,GO:0003100,GO:0003674,GO:0003824,GO:0004175,GO:0004222,GO:0005488,GO:0005515,GO:0005575,GO:0005622,GO:0005623,GO:0005737,GO:0005768,GO:0005769,GO:0005794,GO:0005802,GO:0005886,GO:0006464,GO:0006479,GO:0006508,GO:0006518,GO:0006807,GO:0006915,GO:0006950,GO:0007275,GO:0007399,GO:…	3.4.24.71	ko:K01415	K01415	ECE	endothelin-converting enzyme							-	-
1	75	Under	TRINITY_DN22220_c0_g2_i2	746	TRINITY_DN22220_c0_g2_i2.p1	141	complete	82.2	6.32346	6.361	1.75617	3.62208	0.000292242	0.0125753	0	8	0	6	Cytoplasm|Mitochondrion	Peroxisomal targeting signal							136037.KDR19654	3.57e-63	207	COG0345@1|root,KOG3124@2759|Eukaryota,39QSG@33154|Opisthokonta,3BDSF@33208|Metazoa,3CRY0@33213|Bilateria,41XE8@6656|Arthropoda,3SHFM@50557|Insecta	33208|Metazoa	E	Pyrroline-5-carboxylate reductase	F420_oxidored,P5CR_dimer	-	-	1.5.1.2	ko:K00286	K00286	proC	pyrroline-5-carboxylate reductase							ko00330,ko01100,ko01110,ko01130,ko01230,map00330,map01100,map01110,map01130,map01230	M00015
1	76	Under	TRINITY_DN224_c0_g1_i6	7923	TRINITY_DN224_c0_g1_i6.p1	756	complete	172.3	13.3431	7.42914	2.19867	3.37893	0.000727697	0.0248888	0	1.2	0	1.6	Cytoplasm	Nuclear localization signal							7029.ACYPI066244-PA	1.83e-26	114	COG2801@1|root,KOG0017@2759|Eukaryota,38F42@33154|Opisthokonta,3BA5H@33208|Metazoa,3CWAK@33213|Bilateria,41WI3@6656|Arthropoda,3SIRK@50557|Insecta,3ECJT@33342|Paraneoptera	33208|Metazoa	O	K02A2.6-like	Baculo_F,RVT_1,rve	-	-	-	-										-	-
1	77	Under	TRINITY_DN2253_c0_g1_i4	2695	TRINITY_DN2253_c0_g1_i4.p1	420	complete	3.1	191.663	1.61056	0.498962	3.22782	0.00124738	0.0369183	18.5	37.1	6.6	12.5	Endoplasmic reticulum	Transmembrane domain							136037.KDR16751	7.59e-262	722	KOG1435@1|root,KOG1435@2759|Eukaryota,38D45@33154|Opisthokonta,3BE94@33208|Metazoa,3CVDM@33213|Bilateria,422A2@6656|Arthropoda,3SHY9@50557|Insecta	33208|Metazoa	IT	Ergosterol biosynthesis ERG4/ERG24 family	ERG4_ERG24	DHCR7	GO:0000166,GO:0001568,GO:0001944,GO:0003674,GO:0003824,GO:0005488,GO:0005575,GO:0005622,GO:0005623,GO:0005634,GO:0005635,GO:0005640,GO:0005737,GO:0005783,GO:0005789,GO:0005829,GO:0006066,GO:0006629,GO:0006694,GO:0006695,GO:0007275,GO:0008150,GO:0008152,GO:0008202,GO:0008203,GO:0008610,GO:0009058,GO:0009791,GO:0009889,GO:0009918,GO:0009987,GO:0010817,GO:0012505,GO:0016020,GO:0016021,GO:0016125,GO:…	1.3.1.21	ko:K00213	K00213	DHCR7	7-dehydrocholesterol reductase							ko00100,ko01100,ko01110,map00100,map01100,map01110	M00101
1	78	Under	TRINITY_DN231_c1_g1_i6	1144	TRINITY_DN231_c1_g1_i6.p1	330	5prime_partial	2.5	43.0584	1.335	0.363084	3.67682	0.000236159	0.0108686	12.3	21.2	3.5	3.8	Cytoplasm								136037.KDR21029	3.18e-180	507	COG0656@1|root,KOG1577@2759|Eukaryota,38HH0@33154|Opisthokonta,3BB8T@33208|Metazoa,3CRNB@33213|Bilateria,41TVF@6656|Arthropoda	33208|Metazoa	S	activity. It is involved in the biological process described with oxidation-reduction process	Aldo_ket_red	AKR1A1	GO:0003674,GO:0003824,GO:0004032,GO:0004033,GO:0005575,GO:0005622,GO:0005623,GO:0005737,GO:0005829,GO:0005886,GO:0005975,GO:0005996,GO:0006006,GO:0006063,GO:0006064,GO:0006081,GO:0006082,GO:0006091,GO:0006732,GO:0006766,GO:0006767,GO:0006790,GO:0006793,GO:0006796,GO:0006807,GO:0007275,GO:0007399,GO:0007417,GO:0007420,GO:0008106,GO:0008150,GO:0008152,GO:0009055,GO:0009056,GO:0009058,GO:0009108,GO:…	1.1.1.2,1.1.1.21,2.1.1.215,2.1.1.216	ko:K00002,ko:K00011,ko:K00555	K00002	AKR1A1, adh	alcohol dehydrogenase (NADP+)	K00011	AKR1B	aldehyde reductase	K00555			ko00010,ko00040,ko00051,ko00052,ko00561,ko00790,ko00930,ko01100,ko01110,ko01120,ko01130,ko01220,map00010,map00040,map00051,map00052,map00561,map00790,map00930,map01100,map01110,map01120,map01130,map01220	M00014
1	79	Under	TRINITY_DN2360_c0_g2_i7	3195	TRINITY_DN2360_c0_g2_i7.p1	577	complete	6.1	41.0241	2.61305	0.836534	3.12367	0.00178611	0.0483713	1.9	8.4	1.4	4.2	Cytoplasm	Nuclear localization signal							136037.KDR23290	2.18e-106	325	KOG2933@1|root,KOG2933@2759|Eukaryota,38G28@33154|Opisthokonta,3BQSF@33208|Metazoa,3D7QS@33213|Bilateria,41ZJG@6656|Arthropoda,3SMVJ@50557|Insecta	33208|Metazoa	S	non-motile cilium assembly	CLASP_N	-	-	-	-										-	-
1	80	Under	TRINITY_DN239_c0_g1_i13	4292	TRINITY_DN239_c0_g1_i13.p2	255	complete	10.4	299.205	3.37618	0.783545	4.30885	1.64104e-05	0.00133327	6.2	44.9	6.9	15.3	Nucleus	Nuclear localization signal							7029.ACYPI42996-PA	7.93e-65	210	2CMVD@1|root,2QS6T@2759|Eukaryota,38ITZ@33154|Opisthokonta,3BGFP@33208|Metazoa,3D162@33213|Bilateria,41U69@6656|Arthropoda,3SIX2@50557|Insecta	33208|Metazoa	S	DNA-binding transcription factor activity, RNA polymerase II-specific	DUF4371,Dimer_Tnp_hAT	-	-	-	-										-	-
1	81	Under	TRINITY_DN2425_c7_g6_i1	2774	TRINITY_DN2425_c7_g6_i1.p1	534	5prime_partial	5.8	213.07	2.52372	0.306654	8.22986	1.8744e-16	2.00873e-13	12	49.5	2.8	19.1	Cell membrane	Signal peptide|Transmembrane domain							136037.KDR20475	1.21e-158	466	KOG3776@1|root,KOG3776@2759|Eukaryota,39TD7@33154|Opisthokonta,3BMAI@33208|Metazoa,3D4T4@33213|Bilateria,41X0D@6656|Arthropoda,3SH41@50557|Insecta	33208|Metazoa	T	Belongs to the CD36 family	CD36	SCRB7	-	-	ko:K13885	K13885	SCARB1	scavenger receptor class B, member 1							ko04145,ko04913,ko04925,ko04927,ko04934,ko04975,ko04976,ko04977,ko04979,ko05160,map04145,map04913,map04925,map04927,map04934,map04975,map04976,map04977,map04979,map05160	-
1	82	Under	TRINITY_DN24573_c0_g1_i1	1216	TRINITY_DN24573_c0_g1_i1.p1	346	complete	4.9	25.0593	2.28507	0.608995	3.7522	0.00017529	0.00878599	4	12.8	1	7.1	Peroxisome	Peroxisomal targeting signal							136037.KDR20119	4.71e-151	436	COG0665@1|root,KOG3923@2759|Eukaryota,39SQP@33154|Opisthokonta,3BI8C@33208|Metazoa,3D0HB@33213|Bilateria,41XXJ@6656|Arthropoda,3SJC3@50557|Insecta	33208|Metazoa	E	oxidase activity. It is involved in the biological process described with oxidation-reduction process	DAO	DDO	GO:0000003,GO:0003674,GO:0003824,GO:0003884,GO:0005102,GO:0005488,GO:0005515,GO:0005575,GO:0005622,GO:0005623,GO:0005737,GO:0005777,GO:0005782,GO:0005829,GO:0006082,GO:0006520,GO:0006531,GO:0006533,GO:0006605,GO:0006625,GO:0006807,GO:0006810,GO:0006886,GO:0006996,GO:0007031,GO:0007320,GO:0007610,GO:0007618,GO:0007620,GO:0007625,GO:0008104,GO:0008150,GO:0008152,GO:0008445,GO:0009056,GO:0009063,GO:…	1.4.3.1,1.4.3.3	ko:K00272,ko:K00273,ko:K16582	K00272	DDO	D-aspartate oxidase	K00273	DAO, aao	D-amino-acid oxidase	K16582			ko00250,ko00260,ko00311,ko00330,ko00472,ko01100,ko01130,ko04146,map00250,map00260,map00311,map00330,map00472,map01100,map01130,map04146	-
1	83	Under	TRINITY_DN246_c0_g1_i1	2856	TRINITY_DN246_c0_g1_i1.p1	588	complete	12.7	48.9608	3.66717	0.903453	4.05906	4.9271e-05	0.00340136	1.4	11.2	1.4	4.9	Nucleus	Nuclear export signal							136037.KDR23879	1.12e-78	268	29K4I@1|root,2RTDH@2759|Eukaryota,395D4@33154|Opisthokonta,3CA1D@33208|Metazoa,3DR5P@33213|Bilateria,421SC@6656|Arthropoda,3SPUH@50557|Insecta	33208|Metazoa	S	Domain of unknown function (DUF4539)	DUF4539	-	-	-	-										-	-
1	84	Under	TRINITY_DN246_c0_g1_i2	2417	TRINITY_DN246_c0_g1_i2.p1	510	complete	65	451.107	6.02312	0.458459	13.1377	2.00091e-39	1.50101e-35	3	130.8	0.9	36.8	Nucleus	Nuclear export signal							136037.KDR23879	1.24e-66	233	29K4I@1|root,2RTDH@2759|Eukaryota,395D4@33154|Opisthokonta,3CA1D@33208|Metazoa,3DR5P@33213|Bilateria,421SC@6656|Arthropoda,3SPUH@50557|Insecta	33208|Metazoa	S	Domain of unknown function (DUF4539)	DUF4539	-	-	-	-										-	-
1	85	Under	TRINITY_DN2464_c0_g1_i3	523	TRINITY_DN2464_c0_g1_i3.p1	140	complete	10.3	8.48402	3.36037	1.00863	3.33161	0.000863451	0.028	2.1	13.9	1.3	12.8	Extracellular	Signal peptide							7165.AGAP007347-PA	1.11e-35	127	2BPI7@1|root,2S4CB@2759|Eukaryota,3A79H@33154|Opisthokonta,3BTFJ@33208|Metazoa,3E5IC@33213|Bilateria,42AUI@6656|Arthropoda,3T083@50557|Insecta,459AK@7147|Diptera,45MSB@7148|Nematocera	33208|Metazoa	G	Alpha-lactalbumin / lysozyme C	Lys	-	GO:0003674,GO:0003796,GO:0003824,GO:0004553,GO:0005575,GO:0005576,GO:0005615,GO:0006950,GO:0006952,GO:0008150,GO:0008152,GO:0009056,GO:0009605,GO:0009607,GO:0009617,GO:0009987,GO:0016787,GO:0016798,GO:0016998,GO:0042742,GO:0043170,GO:0043207,GO:0044036,GO:0044237,GO:0044248,GO:0044260,GO:0044421,GO:0050829,GO:0050830,GO:0050896,GO:0051704,GO:0051707,GO:0061783,GO:0071554,GO:0071704,GO:0098542	3.2.1.17	ko:K01185,ko:K13915	K01185	E3.2.1.17	lysozyme	K13915	LYZ	lysozyme C				ko04970,map04970	-
1	86	Under	TRINITY_DN2565_c0_g1_i2	5909	TRINITY_DN2565_c0_g1_i2.p1	1252	complete	3.3	65.0768	1.70716	0.546464	3.124	0.00178408	0.0483713	2.7	6.7	0.7	5.7	Cytoplasm	Nuclear localization signal							136037.KDR07853	0	1732	KOG3508@1|root,KOG3508@2759|Eukaryota,38FII@33154|Opisthokonta,3BCG8@33208|Metazoa,3CSYX@33213|Bilateria,41XVT@6656|Arthropoda,3SGU6@50557|Insecta	33208|Metazoa	T	It is involved in the biological process described with regulation of Ras GTPase activity	C2,DUF3498,RasGAP	DAB2IP	GO:0000122,GO:0000165,GO:0000185,GO:0000187,GO:0000902,GO:0001558,GO:0001932,GO:0001933,GO:0001934,GO:0002237,GO:0002682,GO:0002683,GO:0003008,GO:0003674,GO:0005096,GO:0005102,GO:0005123,GO:0005126,GO:0005172,GO:0005488,GO:0005515,GO:0005543,GO:0005575,GO:0005622,GO:0005623,GO:0005737,GO:0005829,GO:0005886,GO:0006355,GO:0006357,GO:0006464,GO:0006468,GO:0006469,GO:0006793,GO:0006796,GO:0006807,GO:…	-	ko:K17631,ko:K17633,ko:K19901	K17631	SYNGAP, RASA5	Ras/Rap GTPase-activating protein SynGAP	K17633	RASAL2	RAS protein activator-like 2	K19901			ko04014,ko04210,ko04668,map04014,map04210,map04668	-
1	87	Under	TRINITY_DN2603_c0_g1_i11	2442	TRINITY_DN2603_c0_g1_i11.p1	540	complete	146.9	164.176	7.19854	1.4598	4.93117	8.17385e-07	0.000111486	0.5	58.1	0.6	72.2	Endoplasmic reticulum	Signal peptide|Transmembrane domain							7425.NV15381-PA	2.79e-250	702	COG3320@1|root,KOG1221@2759|Eukaryota,39A19@33154|Opisthokonta,3BHVQ@33208|Metazoa,3CZDS@33213|Bilateria,41YIQ@6656|Arthropoda,3SHJH@50557|Insecta,46FVK@7399|Hymenoptera	33208|Metazoa	I	Catalyzes the reduction of fatty acyl-CoA to fatty alcohols	NAD_binding_4,Sterile	-	-	1.2.1.84	ko:K13356	K13356	FAR	alcohol-forming fatty acyl-CoA reductase							ko00073,ko04146,ko04212,map00073,map04146,map04212	-
1	88	Under	TRINITY_DN26374_c0_g1_i1	1033	TRINITY_DN26374_c0_g1_i1.p1	250	complete	27.2	8.67572	4.76739	1.33389	3.57405	0.000351502	0.0144882	0.4	7.3	0.5	6.8	Extracellular	Signal peptide							136037.KDR14106	8.72e-143	407	29HT6@1|root,2RQZW@2759|Eukaryota,39TV8@33154|Opisthokonta,3BK99@33208|Metazoa,3D37A@33213|Bilateria,41YBM@6656|Arthropoda,3SKTX@50557|Insecta	33208|Metazoa	S	Haemolymph juvenile hormone binding protein (JHBP)	JHBP	-	-	-	-										-	-
1	89	Under	TRINITY_DN269_c5_g2_i1	2672	TRINITY_DN269_c5_g2_i1.p1	658	complete	2.3	303.021	1.21577	0.312776	3.88702	0.000101482	0.00606457	36.2	57.4	6.2	15	Cell membrane|Lysosome/Vacuole	Signal peptide|Transmembrane domain							121225.PHUM154210-PA	1.25e-227	655	COG1131@1|root,KOG0061@2759|Eukaryota,39WD0@33154|Opisthokonta,3BKDG@33208|Metazoa,3D4MA@33213|Bilateria,41XX2@6656|Arthropoda,3SG3Y@50557|Insecta,3E9F8@33342|Paraneoptera	33208|Metazoa	Q	ATP binding	ABC2_membrane,ABC_tran	-	GO:0003674,GO:0003824,GO:0005215,GO:0005319,GO:0005575,GO:0005623,GO:0005886,GO:0006810,GO:0006869,GO:0008150,GO:0010876,GO:0015248,GO:0015318,GO:0015399,GO:0015405,GO:0015850,GO:0015918,GO:0016020,GO:0016021,GO:0016462,GO:0016787,GO:0016817,GO:0016818,GO:0016887,GO:0017111,GO:0017127,GO:0022804,GO:0022857,GO:0030301,GO:0031224,GO:0033036,GO:0034040,GO:0034041,GO:0042623,GO:0042626,GO:0043492,GO:…	-	ko:K05679	K05679	ABCG1	ATP-binding cassette, subfamily G (WHITE), member 1							ko02010,map02010	-
1	90	Under	TRINITY_DN2708_c1_g1_i2	2881	TRINITY_DN2708_c1_g1_i2.p1	558	complete	8.7	109.895	3.11944	0.810104	3.85067	0.000117794	0.00654792	4.2	29.5	1.1	37.7	Cell membrane	Transmembrane domain							136037.KDR18064	2.1e-269	752	KOG0254@1|root,KOG0254@2759|Eukaryota,38BKC@33154|Opisthokonta,3BCIB@33208|Metazoa,3CWVB@33213|Bilateria,41VXU@6656|Arthropoda,3SHHP@50557|Insecta	33208|Metazoa	P	facilitative transporter for trehalose. Does not transport maltose, sucrose or lactose. Mediates the bidirectional transfer of trehalose. Responsible for the transport of trehalose synthesized in the fat body and the incorporation of trehalose into other tissues that require a carbon source, thereby regulating trehalose levels in the hemolymph	Sugar_tr	-	-	-	ko:K08145,ko:K14258	K08145	SLC2A8, GLUT8	MFS transporter, SP family, solute carrier family 2 (facilitated glucose transporter), member 8	K14258	TRET1	facilitated trehalose transporter				-	-
1	91	Under	TRINITY_DN2714_c1_g1_i2	2579	TRINITY_DN2714_c1_g1_i2.p1	683	complete	7.8	5569.03	2.95615	0.945528	3.12645	0.00176929	0.0481474	261.2	1491.9	217.8	1536.5	Cytoplasm	Nuclear localization signal							136037.KDR19744	0	1188	28KI0@1|root,2QSZB@2759|Eukaryota,38CI0@33154|Opisthokonta,3B9KE@33208|Metazoa,3CYY4@33213|Bilateria,41UG3@6656|Arthropoda,3SG0D@50557|Insecta	33208|Metazoa	C	Transferrins are iron binding transport proteins which bind Fe(3 ) ion in association with the binding of an anion, usually bicarbonate	Transferrin	MFI2	GO:0000041,GO:0003674,GO:0005488,GO:0005506,GO:0005575,GO:0005576,GO:0005622,GO:0005623,GO:0005737,GO:0005783,GO:0005788,GO:0005886,GO:0006464,GO:0006807,GO:0006810,GO:0006811,GO:0006812,GO:0006826,GO:0007162,GO:0007610,GO:0007635,GO:0008150,GO:0008152,GO:0009605,GO:0009607,GO:0009620,GO:0009893,GO:0009986,GO:0009987,GO:0010468,GO:0010604,GO:0010628,GO:0010715,GO:0010721,GO:0010755,GO:0010756,GO:…	-	ko:K06569	K06569	MFI2, CD228	melanoma-associated antigen p97							-	-
1	92	Under	TRINITY_DN275_c0_g1_i7	5714	TRINITY_DN275_c0_g1_i7.p1	897	complete	45.9	14.6545	5.52189	1.37516	4.01545	5.93316e-05	0.00399778	0	1.8	0	1.2	Cytoplasm|Cell membrane	Nuclear localization signal							136037.KDR15593	0	1319	KOG0586@1|root,KOG0586@2759|Eukaryota,38DPZ@33154|Opisthokonta,3BBR0@33208|Metazoa,3CRTT@33213|Bilateria,41WDD@6656|Arthropoda,3SFMF@50557|Insecta	33208|Metazoa	T	protein serine threonine kinase activity. It is involved in the biological process described with protein phosphorylation	KA1,Pkinase,UBA	MARK1	GO:0000003,GO:0000165,GO:0000166,GO:0000226,GO:0000287,GO:0000422,GO:0000578,GO:0001667,GO:0001709,GO:0001736,GO:0001737,GO:0001738,GO:0001764,GO:0001786,GO:0001932,GO:0001934,GO:0002009,GO:0002064,GO:0002065,GO:0002066,GO:0002165,GO:0002376,GO:0003002,GO:0003006,GO:0003674,GO:0003824,GO:0004672,GO:0004674,GO:0005488,GO:0005515,GO:0005524,GO:0005543,GO:0005546,GO:0005575,GO:0005576,GO:0005622,GO:…	2.7.11.1	ko:K08798	K08798	MARK	MAP/microtubule affinity-regulating kinase							-	-
1	93	Under	TRINITY_DN27738_c0_g1_i1	2146	TRINITY_DN27738_c0_g1_i1.p1	508	complete	4.3	43.4367	2.09398	0.631003	3.31849	0.000905053	0.029056	4.1	11.2	0.8	7.1	Cytoplasm	Nuclear localization signal|Nuclear export signal							136037.KDR22423	3.05e-229	642	2CB6W@1|root,2QR2I@2759|Eukaryota,39UYN@33154|Opisthokonta,3BI8A@33208|Metazoa,3CXRJ@33213|Bilateria,41Z3I@6656|Arthropoda,3SME0@50557|Insecta	33208|Metazoa	S	Protein Family FAM117	FAM117	FAM117B	-	-	-										-	-
1	94	Under	TRINITY_DN2780_c1_g4_i6	3032	TRINITY_DN2780_c1_g4_i6.p1	580	complete	4.4	1536.91	2.12177	0.627676	3.38035	0.000723929	0.0248354	98.9	274.3	24.8	164.7	Extracellular	Signal peptide							136037.KDR07599	8.94e-269	751	COG1626@1|root,KOG0602@2759|Eukaryota,38CKH@33154|Opisthokonta,3BBMJ@33208|Metazoa,3CRSP@33213|Bilateria,42BT8@6656|Arthropoda,3SQ7F@50557|Insecta	33208|Metazoa	G	Trehalase	Trehalase	TREH	GO:0003674,GO:0003824,GO:0004553,GO:0004555,GO:0005575,GO:0005623,GO:0005886,GO:0005903,GO:0005975,GO:0005984,GO:0005991,GO:0005993,GO:0007275,GO:0008150,GO:0008152,GO:0009056,GO:0009311,GO:0009313,GO:0009653,GO:0009887,GO:0009987,GO:0015927,GO:0016020,GO:0016052,GO:0016787,GO:0016798,GO:0031224,GO:0031225,GO:0031226,GO:0032501,GO:0032502,GO:0044237,GO:0044238,GO:0044248,GO:0044262,GO:0044275,GO:…	3.2.1.28	ko:K01194	K01194	TREH, treA, treF	alpha,alpha-trehalase							ko00500,ko01100,map00500,map01100	-
1	95	Under	TRINITY_DN2787_c0_g1_i3	2870	TRINITY_DN2787_c0_g1_i3.p1	534	complete	3.2	33.0722	1.68078	0.438091	3.8366	0.000124749	0.00678293	2.9	6.4	1.4	0.8	Cytoplasm								136037.KDR13305	5.94e-292	807	COG0554@1|root,KOG2517@2759|Eukaryota,39JP3@33154|Opisthokonta,3BAII@33208|Metazoa,3CTYP@33213|Bilateria,41URK@6656|Arthropoda,3SGMA@50557|Insecta	33208|Metazoa	G	Belongs to the FGGY kinase family	FGGY_C,FGGY_N	GK5	GO:0003674,GO:0003824,GO:0004370,GO:0005575,GO:0005622,GO:0005623,GO:0005737,GO:0005739,GO:0005975,GO:0006066,GO:0006071,GO:0006072,GO:0006629,GO:0006638,GO:0006639,GO:0006641,GO:0006793,GO:0006796,GO:0008150,GO:0008152,GO:0009058,GO:0009987,GO:0016301,GO:0016310,GO:0016740,GO:0016772,GO:0016773,GO:0019400,GO:0019637,GO:0019751,GO:0043226,GO:0043227,GO:0043229,GO:0043231,GO:0044237,GO:0044238,GO:…	2.7.1.30	ko:K19583	K19583	GK5	putative glycerol kinase 5							-	-
1	96	Under	TRINITY_DN2810_c0_g2_i2	3216	TRINITY_DN2810_c0_g2_i2.p1	405	complete	9	544.605	3.17652	0.702537	4.5215	6.1403e-06	0.000614167	17.6	101.5	2.9	60.2	Endoplasmic reticulum	Signal peptide|Transmembrane domain							136037.KDR10438	1.77e-281	770	COG0429@1|root,KOG1838@2759|Eukaryota,38E5E@33154|Opisthokonta,3BDWY@33208|Metazoa,3CUB4@33213|Bilateria,41TTX@6656|Arthropoda,3SG71@50557|Insecta	33208|Metazoa	F	alpha/beta hydrolase fold	Abhydrolase_1	ABHD2	GO:0000003,GO:0001669,GO:0003006,GO:0003674,GO:0003707,GO:0003824,GO:0005488,GO:0005575,GO:0005622,GO:0005623,GO:0005737,GO:0005886,GO:0005929,GO:0006629,GO:0006638,GO:0006639,GO:0006950,GO:0007154,GO:0007165,GO:0007276,GO:0007281,GO:0007283,GO:0007286,GO:0007338,GO:0007340,GO:0008150,GO:0008152,GO:0009056,GO:0009566,GO:0009611,GO:0009719,GO:0009725,GO:0009755,GO:0009987,GO:0010033,GO:0012505,GO:…	3.5.4.4	ko:K13697,ko:K19572	K13697	ABHD2	abhydrolase domain-containing protein 2	K19572	CECR1, ADA2	adenosine deaminase CECR1				ko00230,ko01100,map00230,map01100	-
1	97	Under	TRINITY_DN2997_c0_g4_i3	3428	TRINITY_DN2997_c0_g4_i3.p1	507	complete	5.2	137.483	2.39168	0.532745	4.48935	7.14407e-06	0.000693005	6.7	22.9	1.1	11.2	Cytoplasm	Nuclear export signal							136037.KDR09850	0	953	COG0034@1|root,KOG0572@2759|Eukaryota,38CJP@33154|Opisthokonta,3BC3A@33208|Metazoa,3D0K9@33213|Bilateria,41XH1@6656|Arthropoda,3SGJH@50557|Insecta	33208|Metazoa	F	Amidophosphoribosyltransferase activity. It is involved in the biological process described with purine nucleobase biosynthetic process	GATase_6,Pribosyltran	PPAT	GO:0000003,GO:0000082,GO:0000278,GO:0001655,GO:0001822,GO:0003006,GO:0003674,GO:0003824,GO:0004044,GO:0005575,GO:0005622,GO:0005623,GO:0005737,GO:0005829,GO:0006082,GO:0006139,GO:0006144,GO:0006163,GO:0006164,GO:0006188,GO:0006189,GO:0006520,GO:0006541,GO:0006543,GO:0006725,GO:0006753,GO:0006793,GO:0006796,GO:0006807,GO:0006810,GO:0007049,GO:0007275,GO:0007276,GO:0007281,GO:0007292,GO:0007565,GO:…	2.4.2.14	ko:K00764	K00764	purF, PPAT	amidophosphoribosyltransferase							ko00230,ko00250,ko01100,ko01110,ko01130,map00230,map00250,map01100,map01110,map01130	M00048
1	98	Under	TRINITY_DN3_c0_g1_i11	2579	TRINITY_DN3_c0_g1_i11.p1	511	complete	16.9	223.842	4.08162	0.828438	4.92689	8.35499e-07	0.00011327	5.2	57.8	6.4	30.5	Endoplasmic reticulum	Signal peptide|Transmembrane domain							136037.KDR11277	4.81e-257	717	COG2124@1|root,KOG0157@2759|Eukaryota,38CHP@33154|Opisthokonta,3B9GY@33208|Metazoa,3CSG8@33213|Bilateria,41U3I@6656|Arthropoda,3SGAE@50557|Insecta	33208|Metazoa	Q	cytochrome p450	p450	-	-	-	ko:K07427,ko:K15001	K07427	CYP4V	cytochrome P450 family 4 subfamily V	K15001	CYP4	cytochrome P450 family 4				-	-
1	99	Under	TRINITY_DN300_c0_g1_i2	1408	TRINITY_DN300_c0_g1_i2.p1	377	complete	18.5	106.979	4.21209	0.570665	7.38102	1.57076e-13	9.30264e-11	4.2	56.6	3.2	14.7	Cell membrane								7070.TC014165-PA	6.05e-46	168	KOG4423@1|root,KOG4423@2759|Eukaryota,38BWT@33154|Opisthokonta,3B9BE@33208|Metazoa,3CV0Z@33213|Bilateria,41TK3@6656|Arthropoda,3SJ9Z@50557|Insecta	33208|Metazoa	U	GTP binding. It is involved in the biological process described with protein transport	Ras	RAB32	GO:0000166,GO:0000323,GO:0001882,GO:0001883,GO:0002376,GO:0003674,GO:0003824,GO:0003924,GO:0005488,GO:0005515,GO:0005525,GO:0005575,GO:0005622,GO:0005623,GO:0005737,GO:0005739,GO:0005740,GO:0005741,GO:0005764,GO:0005768,GO:0005769,GO:0005773,GO:0005776,GO:0005783,GO:0005794,GO:0005802,GO:0005829,GO:0006464,GO:0006725,GO:0006726,GO:0006727,GO:0006807,GO:0006810,GO:0006856,GO:0006873,GO:0006885,GO:…	-	ko:K07918,ko:K07923	K07918	RAB32	Ras-related protein Rab-32	K07923	RAB38	Ras-related protein Rab-38				-	-
1	100	Under	TRINITY_DN3036_c0_g1_i2	1376	TRINITY_DN3036_c0_g1_i2.p1	182	complete	5.5	62.1405	2.45215	0.636018	3.85547	0.000115508	0.00649878	8	30.1	7.4	6.5	Cytoplasm|Extracellular	Signal peptide							136037.KDR07310	9.08e-94	278	2CMNT@1|root,2QR3D@2759|Eukaryota,39UHX@33154|Opisthokonta,3B9U3@33208|Metazoa,3D2YM@33213|Bilateria,4201I@6656|Arthropoda,3SMSN@50557|Insecta	33208|Metazoa	G	N-acetylmuramoyl-L-alanine amidase activity. It is involved in the biological process described with peptidoglycan catabolic process	Amidase_2	PGLYRP2	GO:0000270,GO:0001519,GO:0001817,GO:0001818,GO:0002218,GO:0002221,GO:0002253,GO:0002376,GO:0002682,GO:0002683,GO:0002684,GO:0002694,GO:0002695,GO:0002697,GO:0002698,GO:0002757,GO:0002758,GO:0002764,GO:0002831,GO:0002832,GO:0003674,GO:0003824,GO:0004040,GO:0005488,GO:0005515,GO:0005539,GO:0005575,GO:0005576,GO:0005622,GO:0005623,GO:0006022,GO:0006026,GO:0006027,GO:0006518,GO:0006807,GO:0006950,GO:…	-	ko:K01446	K01446	PGRP	peptidoglycan recognition protein							-	-
1	101	Under	TRINITY_DN3159_c1_g1_i1	1528	TRINITY_DN3159_c1_g1_i1.p1	226	complete	3.9	122.854	1.95224	0.411736	4.74149	2.12148e-06	0.00024782	18.3	49.1	7	12.9	Cell membrane	Signal peptide							136037.KDR18605	9.51e-73	231	COG5479@1|root,2S2KY@2759|Eukaryota,39YQ1@33154|Opisthokonta,3BJ8H@33208|Metazoa,3D3BY@33213|Bilateria,420FU@6656|Arthropoda,3SNIM@50557|Insecta	33208|Metazoa	M	Animal peptidoglycan recognition proteins homologous to Bacteriophage T3 lysozyme.	Amidase_2	PGLYRP3	GO:0000270,GO:0001817,GO:0001818,GO:0001906,GO:0001932,GO:0001933,GO:0002218,GO:0002221,GO:0002225,GO:0002237,GO:0002252,GO:0002253,GO:0002376,GO:0002682,GO:0002683,GO:0002684,GO:0002694,GO:0002695,GO:0002697,GO:0002698,GO:0002699,GO:0002700,GO:0002702,GO:0002757,GO:0002758,GO:0002759,GO:0002760,GO:0002764,GO:0002784,GO:0002786,GO:0002803,GO:0002805,GO:0002807,GO:0002808,GO:0002813,GO:0002831,GO:…	-	ko:K01446	K01446	PGRP	peptidoglycan recognition protein							-	-
1	102	Under	TRINITY_DN32372_c0_g1_i1	1133	TRINITY_DN32372_c0_g1_i1.p1	207	complete	2.9	31.5572	1.53711	0.368975	4.16588	3.10151e-05	0.00233443	8.2	16.7	3.1	2.3	Cytoplasm|Nucleus	Nuclear localization signal							136037.KDR12889	1.65e-79	253	COG0697@1|root,KOG3416@1|root,KOG1443@2759|Eukaryota,KOG3416@2759|Eukaryota,38I2W@33154|Opisthokonta,3BEMK@33208|Metazoa,3CTW9@33213|Bilateria,41W4K@6656|Arthropoda,3SFUU@50557|Insecta	33208|Metazoa	EG	Solute carrier family 35 member	Collagen,TPT	SLC35C2	GO:0000138,GO:0005575,GO:0005622,GO:0005623,GO:0005634,GO:0005654,GO:0005737,GO:0005793,GO:0005794,GO:0005795,GO:0005801,GO:0006464,GO:0006486,GO:0006493,GO:0006807,GO:0006810,GO:0006811,GO:0006820,GO:0008150,GO:0008152,GO:0008593,GO:0009058,GO:0009059,GO:0009100,GO:0009101,GO:0009892,GO:0009966,GO:0009967,GO:0009987,GO:0010468,GO:0010605,GO:0010629,GO:0010646,GO:0010647,GO:0012505,GO:0015711,GO:…	-	ko:K15280	K15280	SLC35C2	solute carrier family 35, member C2							-	-
1	103	Under	TRINITY_DN337_c0_g1_i9	1091	TRINITY_DN337_c0_g1_i9.p1	146	complete	15.8	49.428	3.98231	1.08479	3.67105	0.000241558	0.0110772	3.2	30.3	1.6	27	Cytoplasm	Nuclear localization signal							7070.TC007467-PA	2.41e-25	108	COG1131@1|root,KOG0061@2759|Eukaryota,39WD0@33154|Opisthokonta,3BKDG@33208|Metazoa,3D4MA@33213|Bilateria,41XX2@6656|Arthropoda,3SG3Y@50557|Insecta	33208|Metazoa	Q	ATP binding	ABC2_membrane,ABC_tran	-	GO:0003674,GO:0003824,GO:0005215,GO:0005319,GO:0005575,GO:0005623,GO:0005886,GO:0006810,GO:0006869,GO:0008150,GO:0010876,GO:0015248,GO:0015318,GO:0015399,GO:0015405,GO:0015850,GO:0015918,GO:0016020,GO:0016021,GO:0016462,GO:0016787,GO:0016817,GO:0016818,GO:0016887,GO:0017111,GO:0017127,GO:0022804,GO:0022857,GO:0030301,GO:0031224,GO:0033036,GO:0034040,GO:0034041,GO:0042623,GO:0042626,GO:0043492,GO:…	-	ko:K05679,ko:K14861	K05679	ABCG1	ATP-binding cassette, subfamily G (WHITE), member 1	K14861	URB1	nucleolar pre-ribosomal-associated protein 1				ko02010,map02010	-
1	104	Under	TRINITY_DN33847_c0_g1_i1	891	TRINITY_DN33847_c0_g1_i1.p1	179	complete	3.9	38.3226	1.97113	0.430742	4.57613	4.73668e-06	0.000498126	10.4	28.2	4.4	0.8	Extracellular	Signal peptide							136037.KDR16864	1.05e-25	106	KOG4297@1|root,KOG4297@2759|Eukaryota,39N0S@33154|Opisthokonta,3CPJX@33208|Metazoa,3E5QZ@33213|Bilateria,421FK@6656|Arthropoda,3T0NR@50557|Insecta	33208|Metazoa	O	C-type lectin (CTL) or carbohydrate-recognition domain (CRD)	Lectin_C	-	-	-	ko:K06721	K06721	CLEC10A, CLECSF13, CLECSF14, CD301	C-type lectin domain family 10 member A							-	-
1	105	Under	TRINITY_DN3472_c0_g1_i19	1608	TRINITY_DN3472_c0_g1_i19.p1	326	complete	171.2	60.1383	7.41987	1.93877	3.82711	0.000129657	0.00690333	0.2	34.2	0.5	45.9	Extracellular	Signal peptide							10224.XP_006825446.1	1.22e-18	90.1	28N19@1|root,2QUK7@2759|Eukaryota,38HHN@33154|Opisthokonta,3BCH4@33208|Metazoa,3CRT4@33213|Bilateria	33208|Metazoa	O	triglyceride lipase activity	Lipase	-	-	3.1.1.3	ko:K14074,ko:K14075,ko:K19404	K14074	PNLIPRP1, PLRP1	pancreatic lipase-related protein 1	K14075	PNLIPRP2, PLRP2	pancreatic lipase-related protein 2	K19404			ko00561,ko01100,ko04972,ko04975,map00561,map01100,map04972,map04975	M00098
1	106	Under	TRINITY_DN3546_c0_g1_i2	2876	TRINITY_DN3546_c0_g1_i2.p1	585	complete	2.5	89.3801	1.32619	0.332292	3.99104	6.57842e-05	0.0043037	9.4	16.8	3.1	5.6	Golgi apparatus	Signal peptide|Transmembrane domain							136037.KDR14159	0	896	KOG2204@1|root,KOG2204@2759|Eukaryota,3ANH5@33154|Opisthokonta,3BBWB@33208|Metazoa,3CRGF@33213|Bilateria,41VWX@6656|Arthropoda,3SJT8@50557|Insecta	33208|Metazoa	G	Belongs to the glycosyl hydrolase 47 family	Glyco_hydro_47	-	GO:0000139,GO:0002252,GO:0002376,GO:0003674,GO:0003824,GO:0004553,GO:0004559,GO:0004571,GO:0005575,GO:0005622,GO:0005623,GO:0005737,GO:0005783,GO:0005794,GO:0006491,GO:0006807,GO:0007275,GO:0007568,GO:0008150,GO:0008152,GO:0008340,GO:0009100,GO:0009987,GO:0010259,GO:0012505,GO:0015923,GO:0015924,GO:0016020,GO:0016787,GO:0016798,GO:0019538,GO:0031090,GO:0031984,GO:0032501,GO:0032502,GO:0035010,GO:…	3.2.1.113	ko:K01230	K01230	MAN1	mannosyl-oligosaccharide alpha-1,2-mannosidase							ko00510,ko00513,ko01100,ko04141,map00510,map00513,map01100,map04141	M00073,M00074
1	107	Under	TRINITY_DN3616_c1_g1_i6	1627	TRINITY_DN3616_c1_g1_i6.p1	266	complete	4.3	14.65	2.10671	0.665411	3.16602	0.00154539	0.0433114	1.9	6.1	0.8	4.5	Endoplasmic reticulum	Transmembrane domain							136037.KDR20355	3.7e-88	270	KOG3071@1|root,KOG3071@2759|Eukaryota,3A1EJ@33154|Opisthokonta,3BQ0E@33208|Metazoa,3D6EH@33213|Bilateria,41YXX@6656|Arthropoda,3SMDS@50557|Insecta	33208|Metazoa	I	Elongation of very long chain fatty acids protein	ELO	-	-	2.3.1.199	ko:K10249,ko:K10250	K10249	ELOVL4	elongation of very long chain fatty acids protein 4	K10250	ELOVL7	elongation of very long chain fatty acids protein 7				ko00062,ko01110,map00062,map01110	M00415
1	108	Under	TRINITY_DN3624_c0_g2_i1	1063	TRINITY_DN3624_c0_g2_i1.p1	324	5prime_partial	17.6	40.5921	4.1336	0.675454	6.11974	9.37276e-10	2.63668e-07	2.5	27.3	1.3	10.3	Extracellular	Signal peptide							136037.KDR20013	3.65e-151	434	KOG1559@1|root,KOG1559@2759|Eukaryota,39K9H@33154|Opisthokonta,3BG09@33208|Metazoa,3CV63@33213|Bilateria,41YC2@6656|Arthropoda,3SK8W@50557|Insecta	33208|Metazoa	H	Omega peptidase activity. It is involved in the biological process described with glutamine metabolic process	Peptidase_C26	GGH	GO:0000323,GO:0001775,GO:0002252,GO:0002263,GO:0002274,GO:0002275,GO:0002283,GO:0002366,GO:0002376,GO:0002443,GO:0002444,GO:0002446,GO:0003674,GO:0003824,GO:0005575,GO:0005576,GO:0005615,GO:0005622,GO:0005623,GO:0005737,GO:0005764,GO:0005766,GO:0005773,GO:0005775,GO:0005829,GO:0006082,GO:0006508,GO:0006575,GO:0006725,GO:0006732,GO:0006760,GO:0006807,GO:0006810,GO:0006887,GO:0006955,GO:0008150,GO:…	3.4.19.9	ko:K01307,ko:K15699	K01307	GGH	gamma-glutamyl hydrolase	K15699	RNF122	RING finger protein 122				ko00790,ko01523,map00790,map01523	-
1	109	Under	TRINITY_DN3652_c0_g1_i2	1341	TRINITY_DN3652_c0_g1_i2.p1	332	complete	15.3	5.35408	3.9333	1.20659	3.25986	0.00111469	0.0339459	0.3	2.8	0.7	1.1	Cytoplasm|Nucleus	Nuclear export signal							136037.KDR23389	1.28e-130	385	KOG0266@1|root,KOG0266@2759|Eukaryota,38G6M@33154|Opisthokonta,3BFXP@33208|Metazoa,3CSDR@33213|Bilateria,41Z9W@6656|Arthropoda,3SHTK@50557|Insecta	33208|Metazoa	S	WD domain, G-beta repeat	WD40	PAAF1	GO:0000502,GO:0005575,GO:0005622,GO:0005623,GO:0032991,GO:0044424,GO:0044464,GO:1902494,GO:1905368,GO:1905369	-	ko:K11887	K11887	PAAF1, RPN14	proteasomal ATPase-associated factor 1							-	-
1	110	Under	TRINITY_DN3654_c0_g1_i1	898	TRINITY_DN3654_c0_g1_i1.p1	159	complete	2.4	38.6484	1.29208	0.382704	3.37619	0.000734976	0.0250237	15	25	3.4	4.2	Endoplasmic reticulum|Golgi apparatus	Signal peptide|Transmembrane domain							136037.KDR20117	6.27e-98	287	KOG1692@1|root,KOG1692@2759|Eukaryota,38HZS@33154|Opisthokonta,3BDBC@33208|Metazoa,3CV3N@33213|Bilateria,41XCE@6656|Arthropoda,3SKHU@50557|Insecta	33208|Metazoa	U	It is involved in the biological process described with transport	EMP24_GP25L	TMED2	GO:0000003,GO:0000139,GO:0000578,GO:0001568,GO:0001701,GO:0001756,GO:0001838,GO:0001841,GO:0001843,GO:0001890,GO:0001892,GO:0001893,GO:0001944,GO:0001947,GO:0002009,GO:0002790,GO:0003002,GO:0003006,GO:0003007,GO:0003143,GO:0003674,GO:0005215,GO:0005575,GO:0005622,GO:0005623,GO:0005737,GO:0005783,GO:0005789,GO:0005793,GO:0005794,GO:0005798,GO:0006810,GO:0006886,GO:0006888,GO:0006890,GO:0006900,GO:…	-	ko:K20347	K20347	TMED2, EMP24	p24 family protein beta-1							-	-
1	111	Under	TRINITY_DN3668_c0_g1_i5	3231	TRINITY_DN3668_c0_g1_i5.p1	1001	complete	88.7	6.83494	6.47014	1.86771	3.46421	0.000531788	0.0197992	0	1.6	0	1.7	Cytoplasm	Nuclear export signal							136037.KDQ71507	4.12e-103	330	KOG4725@1|root,KOG4725@2759|Eukaryota,38EN4@33154|Opisthokonta,3BG14@33208|Metazoa,3CSAJ@33213|Bilateria,41ZXG@6656|Arthropoda,3SP5Z@50557|Insecta	33208|Metazoa	O	FK506 binding protein 15	FKBP_C	FKBP15	GO:0005575,GO:0005623,GO:0008150,GO:0009892,GO:0010563,GO:0010921,GO:0010923,GO:0016020,GO:0019220,GO:0019222,GO:0030424,GO:0030426,GO:0030427,GO:0031323,GO:0031324,GO:0033267,GO:0035303,GO:0035305,GO:0042995,GO:0043005,GO:0043086,GO:0044092,GO:0044463,GO:0044464,GO:0045936,GO:0048519,GO:0048523,GO:0050789,GO:0050790,GO:0050794,GO:0051174,GO:0051336,GO:0051346,GO:0065007,GO:0065009,GO:0097458,GO:…	-	ko:K17478	K17478	FKBP15, WAFL	FK506-binding protein 15							-	-
1	112	Under	TRINITY_DN3695_c0_g1_i2	2171	TRINITY_DN3695_c0_g1_i2.p1	408	complete	47.2	42.2088	5.5604	1.34139	4.14526	3.39427e-05	0.00252941	0.4	13.2	0.8	7.9	Cytoplasm|Nucleus	Nuclear localization signal|Nuclear export signal							136037.KDR15070	6.29e-134	399	KOG0401@1|root,KOG0401@2759|Eukaryota,399I9@33154|Opisthokonta,3BHT4@33208|Metazoa,3D182@33213|Bilateria,420A7@6656|Arthropoda,3SNTI@50557|Insecta	33208|Metazoa	J	RNA binding	MIF4G,PAM2	PAIP1	GO:0002118,GO:0002121,GO:0003674,GO:0003676,GO:0003723,GO:0005488,GO:0005575,GO:0005622,GO:0005623,GO:0005737,GO:0005829,GO:0006412,GO:0006413,GO:0006417,GO:0006518,GO:0006807,GO:0007610,GO:0007635,GO:0008150,GO:0008152,GO:0008494,GO:0009058,GO:0009059,GO:0009889,GO:0009891,GO:0009892,GO:0009893,GO:0009894,GO:0009895,GO:0009987,GO:0010467,GO:0010468,GO:0010556,GO:0010557,GO:0010604,GO:0010605,GO:…	-	ko:K14322	K14322	PAIP1	polyadenylate-binding protein-interacting protein 1							ko03013,map03013	-
1	113	Under	TRINITY_DN3703_c1_g1_i13	1823	TRINITY_DN3703_c1_g1_i13.p1	517	complete	5.4	58.1526	2.43184	0.675343	3.6009	0.000317121	0.0132533	5.4	18.7	1.7	12.1	Extracellular	Signal peptide							136037.KDR24380	3.64e-214	611	COG2272@1|root,KOG1516@2759|Eukaryota,39Y33@33154|Opisthokonta,3BNNT@33208|Metazoa,3D46R@33213|Bilateria,429U3@6656|Arthropoda,3SZ8Y@50557|Insecta	2759|Eukaryota	G	Belongs to the type-B carboxylesterase lipase family	COesterase	-	-	2.7.7.7	ko:K02332	K02332	POLG1, MIP1	DNA polymerase gamma 1							ko01100,ko04139,map01100,map04139	M00294
1	114	Under	TRINITY_DN37778_c0_g1_i1	1248	TRINITY_DN37778_c0_g1_i1.p1	248	complete	2.7	42.416	1.40944	0.416109	3.3872	0.000706102	0.0244099	10.5	18.8	2.1	4.5	Nucleus	Nuclear localization signal							136037.KDR09497	1.33e-128	370	2F7VC@1|root,2RWJC@2759|Eukaryota,3ABCT@33154|Opisthokonta,3BV6A@33208|Metazoa,3DAYS@33213|Bilateria,421FV@6656|Arthropoda,3SP60@50557|Insecta	33208|Metazoa	-	-	-	-	-	-	-										-	-
1	115	Under	TRINITY_DN37975_c0_g1_i1	1038	TRINITY_DN37975_c0_g1_i1.p1	306	5prime_partial	2.5	114.265	1.31339	0.379948	3.45678	0.000546679	0.0200375	36.6	61.9	7.1	14.8	Extracellular	Signal peptide							136037.KDR07915	7.1e-28	114	2C4GD@1|root,2S2VW@2759|Eukaryota,39VS6@33154|Opisthokonta,3BKQ1@33208|Metazoa,3DCID@33213|Bilateria,41ZX6@6656|Arthropoda,3SN1S@50557|Insecta	33208|Metazoa	G	Belongs to the PDGF VEGF growth factor family	PDGF,PDGF_N	PDGFB	GO:0000003,GO:0000079,GO:0000122,GO:0000139,GO:0000165,GO:0001101,GO:0001568,GO:0001654,GO:0001655,GO:0001656,GO:0001666,GO:0001667,GO:0001701,GO:0001754,GO:0001763,GO:0001822,GO:0001890,GO:0001892,GO:0001932,GO:0001934,GO:0001936,GO:0001938,GO:0001944,GO:0001977,GO:0002009,GO:0002064,GO:0002065,GO:0002066,GO:0002376,GO:0002520,GO:0002548,GO:0002576,GO:0003006,GO:0003008,GO:0003013,GO:0003014,GO:…	-	ko:K04359,ko:K05449,ko:K17386	K04359	PDGFA	platelet-derived growth factor subunit A	K05449	VEGFC_D	vascular endothelial growth factor C/D	K17386			ko01521,ko04010,ko04014,ko04015,ko04060,ko04072,ko04151,ko04510,ko04540,ko04630,ko04810,ko04926,ko04933,ko05166,ko05167,ko05200,ko05202,ko05206,ko05211,ko05214,ko05215,ko05218,ko05231,ko05418,map01521,map04010,map04014,map04015,map04060,map04072,map04151,map04510,map04540,map04630,map04810,map04926,map04933,map05166,map05167,map05200,map05202,map05206,map05211,map05214,map05215,map05218,map05231,…	-
1	116	Under	TRINITY_DN3802_c0_g1_i1	2285	TRINITY_DN3802_c0_g1_i1.p1	372	5prime_partial	4.3	85.8196	2.09439	0.46095	4.54363	5.5293e-06	0.000565623	7.6	21.5	1.6	6.9	Cytoplasm|Nucleus	Nuclear localization signal							136037.KDR23222	5.9e-198	559	COG0402@1|root,KOG3968@2759|Eukaryota,38CBX@33154|Opisthokonta,3BA14@33208|Metazoa,3D0DR@33213|Bilateria,41VXM@6656|Arthropoda,3SGV9@50557|Insecta	33208|Metazoa	FQ	guanine deaminase activity. It is involved in the biological process described with guanine catabolic process	Amidohydro_1	GDA	GO:0003674,GO:0003824,GO:0004153,GO:0005488,GO:0005575,GO:0005622,GO:0005623,GO:0005737,GO:0005829,GO:0006139,GO:0006144,GO:0006163,GO:0006195,GO:0006725,GO:0006726,GO:0006753,GO:0006793,GO:0006796,GO:0006807,GO:0007275,GO:0007399,GO:0008150,GO:0008152,GO:0008270,GO:0008892,GO:0009056,GO:0009058,GO:0009112,GO:0009117,GO:0009166,GO:0009987,GO:0010638,GO:0016787,GO:0016810,GO:0016814,GO:0018130,GO:…	3.5.4.3,4.6.1.1	ko:K01487,ko:K11265	K01487	E3.5.4.3, guaD	guanine deaminase	K11265	ADCY10	adenylate cyclase 10				ko00230,ko01100,ko04024,ko04371,ko04713,ko04714,map00230,map01100,map04024,map04371,map04713,map04714	-
1	117	Under	TRINITY_DN3824_c0_g1_i2	1796	TRINITY_DN3824_c0_g1_i2.p1	489	complete	10.6	16.4784	3.40298	1.0811	3.1477	0.0016456	0.0454965	0.9	6.7	1.4	5.1	Cell membrane|Endoplasmic reticulum|Golgi apparatus	Signal peptide|Transmembrane domain							136037.KDR20919	6.01e-265	736	KOG2736@1|root,KOG2736@2759|Eukaryota,38HQN@33154|Opisthokonta,3BE5S@33208|Metazoa,3CRWI@33213|Bilateria,41W2Z@6656|Arthropoda,3SGPM@50557|Insecta	33208|Metazoa	T	subunit of the gamma-secretase complex, an endoprotease complex that catalyzes the intramembrane cleavage of integral membrane proteins such as Notch receptors	Presenilin	PSEN1	GO:0000003,GO:0000041,GO:0000045,GO:0000122,GO:0000186,GO:0000323,GO:0000775,GO:0000776,GO:0001501,GO:0001505,GO:0001568,GO:0001654,GO:0001666,GO:0001708,GO:0001754,GO:0001756,GO:0001764,GO:0001773,GO:0001775,GO:0001919,GO:0001921,GO:0001932,GO:0001933,GO:0001934,GO:0001942,GO:0001944,GO:0001945,GO:0001946,GO:0001947,GO:0002009,GO:0002027,GO:0002036,GO:0002038,GO:0002244,GO:0002252,GO:0002253,GO:…	-	ko:K04505,ko:K04522	K04505	PSEN1, PS1	presenilin 1	K04522	PSEN2, PS2	presenilin 2				ko04310,ko04330,ko04722,ko05010,ko05165,map04310,map04330,map04722,map05010,map05165	M00682
1	118	Under	TRINITY_DN3828_c0_g1_i3	1795	TRINITY_DN3828_c0_g1_i3.p1	396	complete	121.6	23.9537	6.9255	1.84951	3.7445	0.000180757	0.00898296	0.1	9.9	0.2	10.7	Cytoplasm	Nuclear export signal							136037.KDR10674	2.48e-257	709	COG5146@1|root,KOG2201@2759|Eukaryota,38BIM@33154|Opisthokonta,3BFZP@33208|Metazoa,3CSDT@33213|Bilateria,41W3J@6656|Arthropoda,3SI53@50557|Insecta	33208|Metazoa	H	pantothenate kinase activity. It is involved in the biological process described with coenzyme A biosynthetic process	Fumble	PANK1	GO:0000003,GO:0000278,GO:0002009,GO:0002165,GO:0003006,GO:0003674,GO:0003824,GO:0004594,GO:0005575,GO:0005622,GO:0005623,GO:0005634,GO:0005737,GO:0005739,GO:0005740,GO:0005758,GO:0005768,GO:0005819,GO:0005829,GO:0005856,GO:0005886,GO:0006082,GO:0006139,GO:0006163,GO:0006164,GO:0006575,GO:0006725,GO:0006732,GO:0006753,GO:0006766,GO:0006767,GO:0006793,GO:0006796,GO:0006807,GO:0006950,GO:0006979,GO:…	2.7.1.33	ko:K09680,ko:K12648	K09680	coaW	type II pantothenate kinase	K12648	MAVS, IPS1	mitochondrial antiviral-signaling protein				ko00770,ko01100,ko04621,ko04622,ko04623,ko05160,ko05161,ko05162,ko05164,ko05168,map00770,map01100,map04621,map04622,map04623,map05160,map05161,map05162,map05164,map05168	M00120
1	119	Under	TRINITY_DN38441_c0_g1_i1	982	TRINITY_DN38441_c0_g1_i1.p1	221	5prime_partial	153.2	19.6821	7.259	1.60657	4.51832	6.23329e-06	0.000620709	0.1	14.5	0.2	12	Endoplasmic reticulum	Signal peptide							136037.KDR09060	1.04e-85	262	KOG1928@1|root,KOG1928@2759|Eukaryota,39TU6@33154|Opisthokonta,3BDJU@33208|Metazoa,3CSVF@33213|Bilateria,41UFI@6656|Arthropoda,3SIPF@50557|Insecta	33208|Metazoa	G	Lactosylceramide 4-alpha-galactosyltransferase	Gb3_synth,Gly_transf_sug	-	GO:0003674,GO:0003824,GO:0005575,GO:0006629,GO:0006643,GO:0006664,GO:0006665,GO:0006687,GO:0006688,GO:0006807,GO:0008150,GO:0008152,GO:0008194,GO:0008376,GO:0008378,GO:0008593,GO:0008610,GO:0009058,GO:0009247,GO:0009966,GO:0009967,GO:0009987,GO:0010646,GO:0010647,GO:0010941,GO:0016020,GO:0016740,GO:0016757,GO:0016758,GO:0023051,GO:0023056,GO:0030148,GO:0035248,GO:0042981,GO:0043066,GO:0043067,GO:…	2.4.1.228	ko:K01988	K01988	A4GALT	lactosylceramide 4-alpha-galactosyltransferase							ko00601,ko00603,ko01100,map00601,map00603,map01100	M00068
1	120	Under	TRINITY_DN38650_c0_g1_i1	1394	TRINITY_DN38650_c0_g1_i1.p1	234	complete	3.1	136.76	1.61543	0.505711	3.19438	0.0014013	0.0403277	26.9	53.8	4.6	23.3	Cytoplasm|Nucleus	Nuclear localization signal							136037.KDQ97904	5.51e-130	373	COG0638@1|root,KOG0179@2759|Eukaryota,38EK6@33154|Opisthokonta,3BGIT@33208|Metazoa,3CV39@33213|Bilateria,41XBQ@6656|Arthropoda,3SGR9@50557|Insecta	33208|Metazoa	O	Threonine-type endopeptidase activity. It is involved in the biological process described with proteolysis involved in cellular protein catabolic process	Proteasome	PSMB1	GO:0000502,GO:0001775,GO:0002252,GO:0002263,GO:0002274,GO:0002275,GO:0002283,GO:0002366,GO:0002376,GO:0002443,GO:0002444,GO:0002446,GO:0003674,GO:0005488,GO:0005515,GO:0005575,GO:0005576,GO:0005622,GO:0005623,GO:0005634,GO:0005654,GO:0005737,GO:0005829,GO:0005839,GO:0006464,GO:0006508,GO:0006511,GO:0006807,GO:0006810,GO:0006887,GO:0006955,GO:0008150,GO:0008152,GO:0009056,GO:0009057,GO:0009987,GO:…	3.4.25.1	ko:K02732	K02732	PSMB1	20S proteasome subunit beta 6							ko03050,map03050	M00337,M00340
1	121	Under	TRINITY_DN392_c0_g1_i30	1926	TRINITY_DN392_c0_g1_i30.p1	348	complete	47.1	26.2887	5.55886	1.4446	3.84804	0.000119068	0.00659412	0.3	9	0.6	8.1	Nucleus	Nuclear localization signal							136037.KDR23996	9.39e-48	167	KOG4740@1|root,KOG4740@2759|Eukaryota,3A4S6@33154|Opisthokonta,3BS37@33208|Metazoa,3D8DB@33213|Bilateria,42A7D@6656|Arthropoda,3SN5W@50557|Insecta	33208|Metazoa	S	proton channel activity	DUF4817,HTH_24	-	-	-	-										-	-
1	122	Under	TRINITY_DN3948_c0_g1_i11	2184	TRINITY_DN3948_c0_g1_i11.p1	500	complete	5.3	14.0847	2.39538	0.645027	3.71362	0.000204319	0.00980427	1.1	3.9	0.9	0.3	Endoplasmic reticulum	Peroxisomal targeting signal							136037.KDR13306	1.15e-239	673	COG1012@1|root,KOG2456@2759|Eukaryota,38CW8@33154|Opisthokonta,3BDR1@33208|Metazoa,3CZ4X@33213|Bilateria,41TTS@6656|Arthropoda,3SH56@50557|Insecta	33208|Metazoa	C	Belongs to the aldehyde dehydrogenase family	Aldedh	ALDH3A2	GO:0000302,GO:0001561,GO:0001666,GO:0001775,GO:0002252,GO:0002263,GO:0002274,GO:0002275,GO:0002283,GO:0002366,GO:0002376,GO:0002443,GO:0002444,GO:0002446,GO:0003674,GO:0003824,GO:0004028,GO:0004029,GO:0004030,GO:0004033,GO:0005488,GO:0005515,GO:0005575,GO:0005622,GO:0005623,GO:0005634,GO:0005737,GO:0005777,GO:0005778,GO:0005783,GO:0005789,GO:0005811,GO:0005829,GO:0005886,GO:0006066,GO:0006081,GO:…	1.2.1.3,1.2.1.5	ko:K00128,ko:K00129,ko:K04513	K00128	ALDH	aldehyde dehydrogenase (NAD+)	K00129	E1.2.1.5	aldehyde dehydrogenase (NAD(P)+)	K04513			ko00010,ko00053,ko00071,ko00280,ko00310,ko00330,ko00340,ko00350,ko00360,ko00380,ko00410,ko00561,ko00620,ko00625,ko00903,ko00980,ko00981,ko00982,ko01100,ko01110,ko01120,ko01130,ko04011,ko04014,ko04015,ko04022,ko04024,ko04062,ko04071,ko04072,ko04144,ko04150,ko04270,ko04310,ko04350,ko04360,ko04510,ko04520,ko04530,ko04611,ko04621,ko04660,ko04670,ko04722,ko04810,ko04921,ko04972,ko05100,ko05130,ko05133…	M00135
1	123	Under	TRINITY_DN3948_c0_g1_i9	2184	TRINITY_DN3948_c0_g1_i9.p1	500	complete	6.8	61.328	2.77279	0.782584	3.54312	0.000395429	0.015863	3.9	16.7	2.3	11	Endoplasmic reticulum	Peroxisomal targeting signal							136037.KDR13306	5.79e-228	644	COG1012@1|root,KOG2456@2759|Eukaryota,38CW8@33154|Opisthokonta,3BDR1@33208|Metazoa,3CZ4X@33213|Bilateria,41TTS@6656|Arthropoda,3SH56@50557|Insecta	33208|Metazoa	C	Belongs to the aldehyde dehydrogenase family	Aldedh	ALDH3A2	GO:0000302,GO:0001561,GO:0001666,GO:0001775,GO:0002252,GO:0002263,GO:0002274,GO:0002275,GO:0002283,GO:0002366,GO:0002376,GO:0002443,GO:0002444,GO:0002446,GO:0003674,GO:0003824,GO:0004028,GO:0004029,GO:0004030,GO:0004033,GO:0005488,GO:0005515,GO:0005575,GO:0005622,GO:0005623,GO:0005634,GO:0005737,GO:0005777,GO:0005778,GO:0005783,GO:0005789,GO:0005811,GO:0005829,GO:0005886,GO:0006066,GO:0006081,GO:…	1.2.1.3,1.2.1.5	ko:K00128,ko:K00129,ko:K04513	K00128	ALDH	aldehyde dehydrogenase (NAD+)	K00129	E1.2.1.5	aldehyde dehydrogenase (NAD(P)+)	K04513			ko00010,ko00053,ko00071,ko00280,ko00310,ko00330,ko00340,ko00350,ko00360,ko00380,ko00410,ko00561,ko00620,ko00625,ko00903,ko00980,ko00981,ko00982,ko01100,ko01110,ko01120,ko01130,ko04011,ko04014,ko04015,ko04022,ko04024,ko04062,ko04071,ko04072,ko04144,ko04150,ko04270,ko04310,ko04350,ko04360,ko04510,ko04520,ko04530,ko04611,ko04621,ko04660,ko04670,ko04722,ko04810,ko04921,ko04972,ko05100,ko05130,ko05133…	M00135
1	124	Under	TRINITY_DN40_c30_g1_i7	4228	TRINITY_DN40_c30_g1_i7.p2	257	complete	2.2	38.9345	1.11467	0.333516	3.34219	0.000831205	0.0272686	3	4.5	0.4	1.1	Cytoplasm								132113.XP_003488548.1	1.44e-163	460	KOG1422@1|root,KOG1422@2759|Eukaryota,38DYR@33154|Opisthokonta,3B9F7@33208|Metazoa,3CTK9@33213|Bilateria,41UYA@6656|Arthropoda,3SGC0@50557|Insecta,46E06@7399|Hymenoptera	33208|Metazoa	P	Chloride intracellular channel	-	exc-4	GO:0000323,GO:0002064,GO:0003674,GO:0005215,GO:0005216,GO:0005253,GO:0005254,GO:0005488,GO:0005509,GO:0005575,GO:0005622,GO:0005623,GO:0005737,GO:0005739,GO:0005764,GO:0005773,GO:0005886,GO:0005887,GO:0005911,GO:0006810,GO:0006811,GO:0006820,GO:0006821,GO:0008150,GO:0008289,GO:0008509,GO:0009605,GO:0009628,GO:0009629,GO:0009888,GO:0009987,GO:0010033,GO:0015075,GO:0015103,GO:0015108,GO:0015267,GO:…	-	ko:K05022	K05022	CLIC2	chloride intracellular channel protein 2							-	-
1	125	Under	TRINITY_DN401_c0_g1_i2	3035	TRINITY_DN401_c0_g1_i2.p1	755	complete	10.9	32.7418	3.44442	1.084	3.17752	0.00148542	0.0420496	0.9	7.9	0.1	7.2	Cytoplasm								136037.KDR23088	0	979	COG1022@1|root,KOG1256@2759|Eukaryota,39DMK@33154|Opisthokonta,3BB7F@33208|Metazoa,3CY7N@33213|Bilateria,41VCK@6656|Arthropoda,3SIP4@50557|Insecta	33208|Metazoa	I	catalytic activity. It is involved in the biological process described with metabolic process	AMP-binding	ACSBG1	GO:0000003,GO:0000038,GO:0001552,GO:0001676,GO:0003006,GO:0003674,GO:0003824,GO:0004467,GO:0005575,GO:0005622,GO:0005623,GO:0005737,GO:0005739,GO:0005783,GO:0005829,GO:0006082,GO:0006139,GO:0006163,GO:0006164,GO:0006629,GO:0006631,GO:0006633,GO:0006635,GO:0006637,GO:0006725,GO:0006732,GO:0006753,GO:0006790,GO:0006793,GO:0006796,GO:0006807,GO:0006950,GO:0007272,GO:0007275,GO:0007399,GO:0007498,GO:…	3.4.19.3,6.2.1.3	ko:K01304,ko:K15013	K01304	pcp	pyroglutamyl-peptidase	K15013	ACSBG	long-chain-fatty-acid--CoA ligase ACSBG				ko00061,ko00071,ko01100,ko01212,ko03320,ko04920,map00061,map00071,map01100,map01212,map03320,map04920	M00086
1	126	Under	TRINITY_DN407_c0_g3_i1	2791	TRINITY_DN407_c0_g3_i1.p1	591	complete	35.5	1056.52	5.14981	0.987784	5.2135	1.85312e-07	2.87618e-05	10.9	325.7	2.1	462	Cytoplasm|Endoplasmic reticulum	Signal peptide							7425.NV10925-PA	8.79e-159	474	COG2303@1|root,KOG1238@2759|Eukaryota,38UEK@33154|Opisthokonta,3BXM2@33208|Metazoa,3DD9T@33213|Bilateria,42256@6656|Arthropoda,3SJ1U@50557|Insecta,46JQA@7399|Hymenoptera	33208|Metazoa	E	GMC oxidoreductase	GMC_oxred_C,GMC_oxred_N	-	-	1.1.3.49	ko:K21270	K21270	ChuaMOX	(R)-mandelonitrile oxidase							-	-
1	127	Under	TRINITY_DN4079_c0_g1_i5	1525	TRINITY_DN4079_c0_g1_i5.p1	395	complete	4.6	17.6903	2.18751	0.622728	3.51278	0.000443439	0.0172657	2.3	8	1	6	Cell membrane|Lysosome/Vacuole								136037.KDR23003	3.03e-263	726	KOG2381@1|root,KOG2381@2759|Eukaryota,38DFD@33154|Opisthokonta,3BBVC@33208|Metazoa,3CST8@33213|Bilateria,41XMI@6656|Arthropoda,3SFQZ@50557|Insecta	33208|Metazoa	T	Phosphotransferase activity, alcohol group as acceptor	PI3_PI4_kinase	PI4K2B	GO:0000166,GO:0000287,GO:0000323,GO:0001775,GO:0002252,GO:0002263,GO:0002274,GO:0002275,GO:0002276,GO:0002366,GO:0002376,GO:0002443,GO:0002444,GO:0002560,GO:0002561,GO:0003674,GO:0003824,GO:0004430,GO:0005488,GO:0005524,GO:0005575,GO:0005622,GO:0005623,GO:0005737,GO:0005739,GO:0005764,GO:0005765,GO:0005768,GO:0005769,GO:0005770,GO:0005773,GO:0005774,GO:0005794,GO:0005802,GO:0005829,GO:0005886,GO:…	2.7.1.67	ko:K13711	K13711	PI4K2	phosphatidylinositol 4-kinase type 2							ko00562,ko01100,ko04070,map00562,map01100,map04070	M00130
1	128	Under	TRINITY_DN4092_c0_g1_i1	4495	TRINITY_DN4092_c0_g1_i1.p1	1338	complete	3.2	568.424	1.6612	0.317939	5.2249	1.74249e-07	2.73452e-05	31.2	68.6	7.6	15.5	Cytoplasm	Peroxisomal targeting signal							136037.KDR16414	0	2360	COG0046@1|root,KOG1907@2759|Eukaryota,38F1H@33154|Opisthokonta,3B9CY@33208|Metazoa,3D074@33213|Bilateria,41TSU@6656|Arthropoda,3SH00@50557|Insecta	33208|Metazoa	F	Phosphoribosylformylglycinamidine synthase activity. It is involved in the biological process described with 'de novo' IMP biosynthetic process	AIRS,AIRS_C,GATase_5	PFAS	GO:0003674,GO:0003824,GO:0004642,GO:0005575,GO:0005622,GO:0005623,GO:0005737,GO:0005829,GO:0006082,GO:0006139,GO:0006163,GO:0006164,GO:0006188,GO:0006189,GO:0006520,GO:0006541,GO:0006725,GO:0006753,GO:0006793,GO:0006796,GO:0006807,GO:0008150,GO:0008152,GO:0009058,GO:0009064,GO:0009117,GO:0009123,GO:0009124,GO:0009126,GO:0009127,GO:0009150,GO:0009152,GO:0009156,GO:0009161,GO:0009165,GO:0009167,GO:…	6.3.5.3	ko:K01952	K01952	purL, PFAS	phosphoribosylformylglycinamidine synthase							ko00230,ko01100,ko01110,ko01130,map00230,map01100,map01110,map01130	M00048
1	129	Under	TRINITY_DN4132_c0_g1_i1	3457	TRINITY_DN4132_c0_g1_i1.p1	713	complete	2.6	37.9166	1.377	0.418916	3.28706	0.00101238	0.0316438	3.2	5.8	1	2.3	Cytoplasm	Nuclear export signal							136037.KDR14588	0	913	KOG3686@1|root,KOG3686@2759|Eukaryota,38CR4@33154|Opisthokonta,3BBWA@33208|Metazoa,3CSVZ@33213|Bilateria,41V7E@6656|Arthropoda,3SHQ4@50557|Insecta	33208|Metazoa	T	GTPase activator activity. It is involved in the biological process described with regulation of small GTPase mediated signal transduction	GoLoco,Rap_GAP	RAP1GAP	GO:0000139,GO:0000902,GO:0000904,GO:0003674,GO:0003824,GO:0003924,GO:0005096,GO:0005488,GO:0005515,GO:0005575,GO:0005622,GO:0005623,GO:0005634,GO:0005635,GO:0005737,GO:0005768,GO:0005769,GO:0005794,GO:0005813,GO:0005815,GO:0005829,GO:0005856,GO:0005886,GO:0006928,GO:0006935,GO:0007154,GO:0007165,GO:0007275,GO:0007399,GO:0007409,GO:0007411,GO:0008047,GO:0008150,GO:0008285,GO:0008361,GO:0009605,GO:…	-	ko:K17700,ko:K17708	K17700	RAP1GAP, RAPGAP	RAP1 GTPase activating protein 1	K17708	RAP1GAP2	RAP1 GTPase activating protein 2				ko04015,map04015	-
1	130	Under	TRINITY_DN41621_c0_g1_i1	1609	TRINITY_DN41621_c0_g1_i1.p1	454	complete	5.5	11.7995	2.4668	0.658941	3.74359	0.000181412	0.00899154	1.2	4.5	0.4	1.5	Cytoplasm								136037.KDR22863	6.08e-237	658	KOG1829@1|root,KOG1829@2759|Eukaryota,38CBC@33154|Opisthokonta,3BHJD@33208|Metazoa,3CUCM@33213|Bilateria,41Y8C@6656|Arthropoda,3SK75@50557|Insecta	33208|Metazoa	T	Zinc ion binding. It is involved in the biological process described with intracellular signal transduction	C1_1,zf-RING_9	DEF8	GO:0008150,GO:0031344,GO:0031346,GO:0032418,GO:0034103,GO:0034105,GO:0044087,GO:0044089,GO:0045124,GO:0045780,GO:0046850,GO:0046852,GO:0048518,GO:0048522,GO:0050789,GO:0050794,GO:0051128,GO:0051130,GO:0051179,GO:0051239,GO:0051240,GO:0051640,GO:0051641,GO:0060491,GO:0065007,GO:0065008,GO:0120032,GO:0120034,GO:0120035,GO:1900027,GO:1900029	-	-										-	-
1	131	Under	TRINITY_DN4178_c0_g1_i1	2983	TRINITY_DN4178_c0_g1_i1.p1	348	complete	4.3	887.043	2.11445	0.613263	3.44787	0.000565022	0.0205425	58.4	162.9	20.7	79.7	Extracellular	Signal peptide							136037.KDR21228	1.15e-174	495	28MRA@1|root,2QU9D@2759|Eukaryota,39TIS@33154|Opisthokonta,3BGWE@33208|Metazoa,3D3D1@33213|Bilateria,41TNA@6656|Arthropoda,3SKIA@50557|Insecta	33208|Metazoa	-	-	MACPF	tsl	GO:0000003,GO:0000578,GO:0000902,GO:0000904,GO:0001703,GO:0001709,GO:0002064,GO:0003002,GO:0003006,GO:0003381,GO:0003382,GO:0003383,GO:0003384,GO:0005575,GO:0005576,GO:0006355,GO:0006357,GO:0006928,GO:0007154,GO:0007165,GO:0007166,GO:0007167,GO:0007169,GO:0007275,GO:0007276,GO:0007277,GO:0007278,GO:0007350,GO:0007351,GO:0007354,GO:0007362,GO:0007369,GO:0007370,GO:0007389,GO:0008150,GO:0008293,GO:…	-	ko:K12377	K12377	TSL	torso-like protein							ko04013,map04013	-
1	132	Under	TRINITY_DN4237_c0_g1_i1	1874	TRINITY_DN4237_c0_g1_i1.p1	205	complete	2.6	146.135	1.37957	0.400655	3.4433	0.000574668	0.0207258	23.5	40.6	3.6	11.7	Cytoplasm|Nucleus	Nuclear localization signal|Nuclear export signal							136037.KDR23887	5.08e-142	401	COG0638@1|root,KOG0180@2759|Eukaryota,38GZR@33154|Opisthokonta,3B9UW@33208|Metazoa,3D1MR@33213|Bilateria,41XPI@6656|Arthropoda,3SHCI@50557|Insecta	33208|Metazoa	O	threonine-type endopeptidase activity. It is involved in the biological process described with proteolysis involved in cellular protein catabolic process	Proteasome	PSMB3	GO:0000502,GO:0003674,GO:0003824,GO:0004175,GO:0005488,GO:0005515,GO:0005575,GO:0005622,GO:0005623,GO:0005634,GO:0005654,GO:0005737,GO:0005829,GO:0005839,GO:0006464,GO:0006508,GO:0006511,GO:0006807,GO:0008150,GO:0008152,GO:0008233,GO:0009056,GO:0009057,GO:0009987,GO:0010498,GO:0016579,GO:0016787,GO:0019538,GO:0019774,GO:0019941,GO:0030163,GO:0031974,GO:0031981,GO:0032991,GO:0036211,GO:0043161,GO:…	3.4.25.1	ko:K02735	K02735	PSMB3	20S proteasome subunit beta 3							ko03050,map03050	M00337,M00340
1	133	Under	TRINITY_DN4295_c0_g1_i1	2293	TRINITY_DN4295_c0_g1_i1.p1	398	complete	332.5	25.7483	8.37735	1.92811	4.34484	1.39376e-05	0.00117919	0	7.6	0	6.2	Cytoplasm|Nucleus	Nuclear localization signal							136037.KDR14370	5.23e-216	604	KOG2752@1|root,KOG2752@2759|Eukaryota,38GJS@33154|Opisthokonta,3BA1D@33208|Metazoa,3CXRE@33213|Bilateria,41W9W@6656|Arthropoda,3SIVY@50557|Insecta	33208|Metazoa	S	Zinc ion binding	zf-UBR	UBR7	-	2.3.2.27	ko:K11979	K11979	UBR7	E3 ubiquitin-protein ligase UBR7							-	-
1	134	Under	TRINITY_DN430_c0_g1_i11	2497	TRINITY_DN430_c0_g1_i11.p1	457	complete	2.8	339.923	1.46127	0.469477	3.11254	0.00185482	0.0495839	38.6	79.1	7.6	52.4	Cell membrane|Lysosome/Vacuole	Signal peptide|Transmembrane domain							136037.KDR21992	1.39e-147	428	COG4886@1|root,KOG0619@2759|Eukaryota,3A12R@33154|Opisthokonta,3BPAY@33208|Metazoa,3D6RU@33213|Bilateria,41YNG@6656|Arthropoda,3SM9C@50557|Insecta	33208|Metazoa	S	Protein singed wings	LRR_8	-	GO:0002165,GO:0007154,GO:0007165,GO:0007275,GO:0008150,GO:0009719,GO:0009725,GO:0009791,GO:0009987,GO:0010033,GO:0014070,GO:0023052,GO:0032501,GO:0032502,GO:0033993,GO:0035073,GO:0035075,GO:0035210,GO:0035556,GO:0036314,GO:0042221,GO:0048856,GO:0050789,GO:0050794,GO:0050896,GO:0051716,GO:0065007,GO:0097305,GO:1901654,GO:1901700	-	-										-	-
1	135	Under	TRINITY_DN4355_c0_g1_i1	1872	TRINITY_DN4355_c0_g1_i1.p1	375	complete	3.7	102.496	1.89857	0.555376	3.41853	0.000629592	0.0224904	12.5	30.6	4.9	10.4	Endoplasmic reticulum	Signal peptide							136037.KDR09261	7.98e-250	687	KOG4265@1|root,KOG4265@2759|Eukaryota,39N2V@33154|Opisthokonta,3BGTJ@33208|Metazoa,3D01I@33213|Bilateria,41XYR@6656|Arthropoda,3SK65@50557|Insecta	33208|Metazoa	O	Zinc finger, C3HC4 type (RING finger)	zf-C3HC4_3	CGRRF1	GO:0001558,GO:0005575,GO:0005622,GO:0005623,GO:0005634,GO:0005654,GO:0008150,GO:0008285,GO:0030308,GO:0031974,GO:0031981,GO:0040008,GO:0042127,GO:0043226,GO:0043227,GO:0043229,GO:0043231,GO:0043233,GO:0044422,GO:0044424,GO:0044428,GO:0044446,GO:0044464,GO:0045926,GO:0048519,GO:0048523,GO:0050789,GO:0050794,GO:0051128,GO:0065007,GO:0070013	-	-										-	-
1	136	Under	TRINITY_DN449_c0_g1_i12	1327	TRINITY_DN449_c0_g1_i12.p1	238	complete	4.6	97.1129	2.20478	0.451794	4.88006	1.06052e-06	0.000138762	14.6	45.9	6	12.4	Extracellular	Signal peptide							7070.TC000515-PA	1.51e-83	256	28MZH@1|root,2QUID@2759|Eukaryota,39KQ3@33154|Opisthokonta,3CP50@33208|Metazoa,3E598@33213|Bilateria,4225R@6656|Arthropoda,3SQKF@50557|Insecta	33208|Metazoa	O	Thaumatin family	Thaumatin	-	GO:0005575,GO:0005576	-	-										-	-
1	137	Under	TRINITY_DN4541_c1_g1_i1	900	TRINITY_DN4541_c1_g1_i1.p1	222	complete	5.7	38.2768	2.49959	0.455314	5.48982	4.02352e-08	7.60919e-06	7.7	29.9	2.8	8.6	Cell membrane								7460.GB42858-PA	2.98e-33	126	2E1HR@1|root,2S8UT@2759|Eukaryota,3AB36@33154|Opisthokonta,3BUA0@33208|Metazoa,3DAQ4@33213|Bilateria,4214D@6656|Arthropoda,3SPBN@50557|Insecta,46IXA@7399|Hymenoptera	33208|Metazoa	-	-	-	-	-	-	-										-	-
1	138	Under	TRINITY_DN4544_c0_g1_i7	3482	TRINITY_DN4544_c0_g1_i7.p1	195	complete	11.7	28.3249	3.54887	1.07183	3.31105	0.000929458	0.0297123	0.7	4.8	0.5	4.6	Cytoplasm|Nucleus	Nuclear export signal							13249.RPRC014273-PA	4.23e-28	109	KOG4797@1|root,KOG4797@2759|Eukaryota,39Y9U@33154|Opisthokonta,3BN6F@33208|Metazoa,3D3YF@33213|Bilateria,421HA@6656|Arthropoda,3SPGI@50557|Insecta,3EE6S@33342|Paraneoptera	33208|Metazoa	K	TSC-22/dip/bun family	DUF4703,TSC22	TSC22D4	GO:0000981,GO:0002682,GO:0002683,GO:0003674,GO:0003700,GO:0005575,GO:0005622,GO:0005623,GO:0005634,GO:0005737,GO:0006355,GO:0006357,GO:0006950,GO:0006970,GO:0008150,GO:0009628,GO:0009889,GO:0009890,GO:0009892,GO:0010468,GO:0010556,GO:0010558,GO:0010605,GO:0010629,GO:0010941,GO:0019219,GO:0019222,GO:0031323,GO:0031324,GO:0031326,GO:0031327,GO:0042981,GO:0043066,GO:0043067,GO:0043069,GO:0043226,GO:…	-	-										-	-
1	139	Under	TRINITY_DN4605_c0_g1_i1	1350	TRINITY_DN4605_c0_g1_i1.p1	172	complete	3.4	609.827	1.77974	0.458162	3.88452	0.000102533	0.00609466	114.3	257.9	20.5	95.5	Cytoplasm|Nucleus	Nuclear export signal							136037.KDR20562	4.1e-102	298	KOG4006@1|root,KOG4006@2759|Eukaryota,3A43J@33154|Opisthokonta,3BSA3@33208|Metazoa,3DAC3@33213|Bilateria,41ZZ2@6656|Arthropoda,3SN9D@50557|Insecta	33208|Metazoa	T	BTG family	BTG	BTG1	-	-	ko:K14443	K14443	TOB	protein Tob/BTG							ko03018,map03018	-
1	140	Under	TRINITY_DN4670_c0_g1_i3	2324	TRINITY_DN4670_c0_g1_i3.p1	340	complete	10.7	45.1352	3.41391	0.837221	4.07766	4.54903e-05	0.00322953	1.8	12	1.1	10	Cytoplasm|Extracellular	Signal peptide							136037.KDR24044	1.57e-257	709	29D7G@1|root,2RKBA@2759|Eukaryota,39T6K@33154|Opisthokonta,3BJCU@33208|Metazoa,3D3GM@33213|Bilateria,41Y5C@6656|Arthropoda,3SG93@50557|Insecta	33208|Metazoa	O	chitin binding. It is involved in the biological process described with chitin metabolic process	CBM_14,Ldl_recept_a,Polysacc_deac_1	-	GO:0003674,GO:0003824,GO:0004099,GO:0004553,GO:0004568,GO:0005488,GO:0005575,GO:0005576,GO:0006022,GO:0006026,GO:0006030,GO:0006032,GO:0006040,GO:0006807,GO:0008061,GO:0008144,GO:0008150,GO:0008152,GO:0009056,GO:0009057,GO:0009987,GO:0016787,GO:0016798,GO:0016810,GO:0016811,GO:0017144,GO:0019213,GO:0042737,GO:0043170,GO:0044237,GO:0044248,GO:0046348,GO:0071704,GO:0097367,GO:1901071,GO:1901072,GO:…	-	-										-	-
1	141	Under	TRINITY_DN4745_c0_g1_i21	1668	TRINITY_DN4745_c0_g1_i21.p1	493	complete	2.7	60.3151	1.42409	0.42329	3.36432	0.000767314	0.0258509	10.8	20.4	3.1	8	Endoplasmic reticulum	Signal peptide							136037.KDR15980	2.38e-153	454	COG3320@1|root,KOG1221@2759|Eukaryota,39WVZ@33154|Opisthokonta,3BJYK@33208|Metazoa,3D16R@33213|Bilateria,41VT5@6656|Arthropoda,3SGUF@50557|Insecta	33208|Metazoa	I	Catalyzes the reduction of fatty acyl-CoA to fatty alcohols	NAD_binding_4,Sterile	-	GO:0003674,GO:0003824,GO:0005575,GO:0005622,GO:0005623,GO:0005737,GO:0005777,GO:0006139,GO:0006163,GO:0006637,GO:0006725,GO:0006732,GO:0006753,GO:0006790,GO:0006793,GO:0006796,GO:0006807,GO:0008150,GO:0008152,GO:0009058,GO:0009117,GO:0009150,GO:0009259,GO:0009987,GO:0010025,GO:0010166,GO:0016491,GO:0016620,GO:0016903,GO:0019637,GO:0019693,GO:0033865,GO:0033875,GO:0034032,GO:0034641,GO:0035336,GO:…	1.2.1.84	ko:K13356	K13356	FAR	alcohol-forming fatty acyl-CoA reductase							ko00073,ko04146,ko04212,map00073,map04146,map04212	-
1	142	Under	TRINITY_DN4763_c0_g1_i1	1757	TRINITY_DN4763_c0_g1_i1.p1	316	complete	132.6	10.3419	7.05083	1.39146	5.06723	4.03648e-07	6.05466e-05	0	4.2	0	2.2	Extracellular	Signal peptide							136037.KDR08568	2.4e-162	461	COG3338@1|root,KOG0382@2759|Eukaryota,38CIB@33154|Opisthokonta,3BEG5@33208|Metazoa,3CZ7G@33213|Bilateria,41YWX@6656|Arthropoda,3SKVT@50557|Insecta	33208|Metazoa	P	It is involved in the biological process described with one-carbon metabolic process	Carb_anhydrase	CA14	GO:0003674,GO:0003824,GO:0004089,GO:0005575,GO:0005623,GO:0005886,GO:0006810,GO:0006811,GO:0006820,GO:0006885,GO:0008150,GO:0015669,GO:0015670,GO:0015701,GO:0015711,GO:0015893,GO:0016020,GO:0016021,GO:0016829,GO:0016835,GO:0016836,GO:0019755,GO:0031224,GO:0031225,GO:0031226,GO:0042221,GO:0042493,GO:0042592,GO:0044425,GO:0044459,GO:0044464,GO:0046658,GO:0048878,GO:0050801,GO:0050896,GO:0051179,GO:…	4.2.1.1	ko:K01672,ko:K01674,ko:K18246	K01672	CA	carbonic anhydrase	K01674	cah	carbonic anhydrase	K18246			ko00910,ko04964,map00910,map04964	-
1	143	Under	TRINITY_DN4777_c0_g1_i1	2812	TRINITY_DN4777_c0_g1_i1.p1	763	complete	3	69.813	1.58359	0.44672	3.54493	0.000392714	0.0158104	6.5	13.2	2.3	3.2	Cytoplasm	Nuclear export signal							136037.KDR21971	2.76e-295	825	COG2802@1|root,KOG4159@2759|Eukaryota,38F1Y@33154|Opisthokonta,3BEYD@33208|Metazoa,3CT7S@33213|Bilateria,41VMV@6656|Arthropoda,3SIJS@50557|Insecta	33208|Metazoa	O	ATP-dependent peptidase activity. It is involved in the biological process described with proteolysis	LON_substr_bdg,zf-C3HC4_2,zf-C3HC4_3,zf-C3HC4_4,zf-RING_UBOX	LONRF3	GO:0000209,GO:0003674,GO:0003824,GO:0004842,GO:0005488,GO:0005515,GO:0005575,GO:0005622,GO:0005623,GO:0005737,GO:0005829,GO:0006464,GO:0006807,GO:0008150,GO:0008152,GO:0008270,GO:0009893,GO:0009894,GO:0009896,GO:0009987,GO:0010604,GO:0016567,GO:0016740,GO:0019222,GO:0019538,GO:0019787,GO:0019899,GO:0030162,GO:0031323,GO:0031325,GO:0031329,GO:0031331,GO:0031624,GO:0032268,GO:0032270,GO:0032434,GO:…	-	-										-	-
1	144	Under	TRINITY_DN48391_c0_g1_i1	791	TRINITY_DN48391_c0_g1_i1.p1	188	complete	12.2	6.59119	3.61214	1.0988	3.28736	0.00101131	0.0316438	0.8	7.7	0.6	8.9	Extracellular	Signal peptide							136037.KDR12554	1.09e-40	145	2E93Y@1|root,2SFHR@2759|Eukaryota,3AAH2@33154|Opisthokonta,3BV1N@33208|Metazoa,3DBKW@33213|Bilateria,423JQ@6656|Arthropoda,3SRS0@50557|Insecta	33208|Metazoa	S	C-type lectin (CTL) or carbohydrate-recognition domain (CRD)	Lectin_C	-	-	-	-										-	-
1	145	Under	TRINITY_DN48416_c0_g1_i2	3429	TRINITY_DN48416_c0_g1_i2.p1	673	complete	5.6	46.3805	2.49445	0.66033	3.77758	0.00015836	0.00817404	2.1	7.6	0.5	5.3	Extracellular	Signal peptide							7460.GB43095-PA	3.21e-274	773	KOG1216@1|root,KOG1216@2759|Eukaryota,38TEU@33154|Opisthokonta,3B98U@33208|Metazoa,3CRF5@33213|Bilateria,41TQR@6656|Arthropoda,3SGXG@50557|Insecta,46I2M@7399|Hymenoptera	33208|Metazoa	VW	von Willebrand factor type C domain	C8,TIL,VWC,VWD	BMPER	GO:0001525,GO:0001568,GO:0001655,GO:0001657,GO:0001775,GO:0001822,GO:0001823,GO:0001932,GO:0001934,GO:0001935,GO:0001944,GO:0002009,GO:0002040,GO:0002043,GO:0002165,GO:0003002,GO:0003674,GO:0005102,GO:0005488,GO:0005515,GO:0005575,GO:0005576,GO:0005615,GO:0005623,GO:0006355,GO:0006357,GO:0007275,GO:0007389,GO:0007423,GO:0007444,GO:0007472,GO:0007474,GO:0007476,GO:0007552,GO:0007560,GO:0008150,GO:…	-	-										-	-
1	146	Under	TRINITY_DN4893_c0_g1_i1	2377	TRINITY_DN4893_c0_g1_i1.p1	456	complete	5.9	69.6804	2.56839	0.642686	3.99633	6.4331e-05	0.0042493	4.5	17.3	2.4	9.2	Cell membrane	Transmembrane domain							136037.KDR10840	8.95e-248	690	KOG2532@1|root,KOG2532@2759|Eukaryota,39XKC@33154|Opisthokonta,3BMP2@33208|Metazoa,3D5XJ@33213|Bilateria,41YGC@6656|Arthropoda,3SIAX@50557|Insecta	33208|Metazoa	G	It is involved in the biological process described with transmembrane transport	MFS_1	-	GO:0003333,GO:0003674,GO:0005215,GO:0005283,GO:0005310,GO:0005313,GO:0005314,GO:0005326,GO:0005328,GO:0005342,GO:0005343,GO:0005416,GO:0005575,GO:0005623,GO:0005886,GO:0006082,GO:0006520,GO:0006541,GO:0006807,GO:0006810,GO:0006811,GO:0006812,GO:0006814,GO:0006817,GO:0006820,GO:0006835,GO:0006836,GO:0006855,GO:0006865,GO:0006996,GO:0007005,GO:0008150,GO:0008152,GO:0008324,GO:0008509,GO:0008514,GO:…	-	ko:K08193	K08193	SLC17A	MFS transporter, ACS family, solute carrier family 17 (sodium-dependent inorganic phosphate cotransporter), other							-	-
1	147	Under	TRINITY_DN5040_c0_g1_i2	1799	TRINITY_DN5040_c0_g1_i2.p1	394	complete	2.9	65.1913	1.51422	0.390257	3.88005	0.000104434	0.00616871	10.2	20.4	3	6	Cell membrane	Signal peptide|Transmembrane domain							136037.KDR21220	1.63e-231	645	KOG2641@1|root,KOG2641@2759|Eukaryota,38CUU@33154|Opisthokonta,3BCTY@33208|Metazoa,3CUXU@33213|Bilateria,41UBB@6656|Arthropoda,3SGQG@50557|Insecta	33208|Metazoa	T	Organic solute transporter Ostalpha	Solute_trans_a	TMEM184B	GO:0000003,GO:0003006,GO:0003674,GO:0005215,GO:0005488,GO:0005539,GO:0005575,GO:0005622,GO:0005623,GO:0005737,GO:0005768,GO:0005769,GO:0005886,GO:0006950,GO:0006952,GO:0007275,GO:0007399,GO:0007530,GO:0008037,GO:0008038,GO:0008039,GO:0008150,GO:0008201,GO:0009605,GO:0009607,GO:0009620,GO:0009987,GO:0010008,GO:0012505,GO:0012506,GO:0016020,GO:0016021,GO:0018992,GO:0022008,GO:0022414,GO:0030141,GO:…	3.4.24.70	ko:K01414	K01414	prlC	oligopeptidase A							-	-
1	148	Under	TRINITY_DN509_c0_g1_i6	1336	TRINITY_DN509_c0_g1_i6.p1	203	5prime_partial	3.1	95.1568	1.64046	0.464058	3.53502	0.000407739	0.0161837	19.3	40.3	6.9	9.3	Extracellular	Signal peptide							7070.TC003391-PA	5.19e-46	157	2D544@1|root,2S541@2759|Eukaryota,3A68B@33154|Opisthokonta,3BSWR@33208|Metazoa,3D9V6@33213|Bilateria,420BF@6656|Arthropoda,3SNXH@50557|Insecta	33208|Metazoa	S	growth factor activity	PTN_MK_C	-	GO:0003674,GO:0005488,GO:0005539,GO:0005575,GO:0005576,GO:0007275,GO:0007498,GO:0007568,GO:0008150,GO:0008201,GO:0008340,GO:0009653,GO:0009888,GO:0010259,GO:0032501,GO:0032502,GO:0043167,GO:0043168,GO:0048332,GO:0048729,GO:0048856,GO:0097367,GO:1901681	-	-										-	-
1	149	Under	TRINITY_DN5132_c0_g1_i3	2956	TRINITY_DN5132_c0_g1_i3.p1	584	complete	2.7	235.905	1.40704	0.358324	3.92673	8.61088e-05	0.00532384	22.8	42.9	5.8	15.3	Cytoplasm	Nuclear export signal							136037.KDR14452	0	928	KOG0592@1|root,KOG0592@2759|Eukaryota,38C50@33154|Opisthokonta,3B9MT@33208|Metazoa,3CYMK@33213|Bilateria,41XK3@6656|Arthropoda,3SJD5@50557|Insecta	33208|Metazoa	T	It is involved in the biological process described with protein phosphorylation	PH_3,Pkinase	PDPK1	GO:0000003,GO:0001558,GO:0001775,GO:0001932,GO:0001933,GO:0001934,GO:0001936,GO:0001938,GO:0002064,GO:0002065,GO:0002066,GO:0002067,GO:0002068,GO:0002119,GO:0002164,GO:0002218,GO:0002220,GO:0002223,GO:0002253,GO:0002376,GO:0002429,GO:0002682,GO:0002683,GO:0002684,GO:0002694,GO:0002696,GO:0002697,GO:0002699,GO:0002703,GO:0002757,GO:0002758,GO:0002764,GO:0002768,GO:0002886,GO:0003006,GO:0003008,GO:…	2.7.11.1	ko:K06276	K06276	PDPK1	3-phosphoinositide dependent protein kinase-1							ko01524,ko03320,ko04011,ko04068,ko04071,ko04140,ko04150,ko04151,ko04152,ko04210,ko04510,ko04660,ko04664,ko04722,ko04910,ko04919,ko04931,ko04960,ko05145,ko05160,ko05205,ko05213,ko05215,ko05223,ko05231,map01524,map03320,map04011,map04068,map04071,map04140,map04150,map04151,map04152,map04210,map04510,map04660,map04664,map04722,map04910,map04919,map04931,map04960,map05145,map05160,map05205,map05213,m…	-
1	150	Under	TRINITY_DN51586_c0_g1_i1	927	TRINITY_DN51586_c0_g1_i1.p1	261	complete	4.3	142.942	2.10693	0.577077	3.65104	0.000261181	0.0116625	34.8	96.1	7.9	50.6	Cytoplasm|Nucleus	Nuclear export signal							136037.KDR12542	1.91e-151	429	KOG0185@1|root,KOG0185@2759|Eukaryota,38G4U@33154|Opisthokonta,3B964@33208|Metazoa,3CZ27@33213|Bilateria,41WQQ@6656|Arthropoda,3SHPX@50557|Insecta	33208|Metazoa	O	Threonine-type endopeptidase activity. It is involved in the biological process described with proteolysis involved in cellular protein catabolic process	Proteasome	PSMB4	GO:0000226,GO:0000502,GO:0001530,GO:0002682,GO:0002683,GO:0002861,GO:0002862,GO:0003674,GO:0005488,GO:0005575,GO:0005622,GO:0005623,GO:0005634,GO:0005654,GO:0005737,GO:0005829,GO:0005839,GO:0006464,GO:0006508,GO:0006511,GO:0006807,GO:0006996,GO:0007010,GO:0007017,GO:0007049,GO:0007098,GO:0008150,GO:0008152,GO:0008289,GO:0009056,GO:0009057,GO:0009987,GO:0010498,GO:0016043,GO:0016579,GO:0019538,GO:…	3.4.25.1	ko:K02736	K02736	PSMB4	20S proteasome subunit beta 7							ko03050,map03050	M00337,M00340
1	151	Under	TRINITY_DN51736_c0_g1_i1	1389	TRINITY_DN51736_c0_g1_i1.p1	254	complete	2.5	111.675	1.304	0.418765	3.11391	0.00184623	0.0494636	25.8	42.7	6.6	9.6	Cytoplasm|Nucleus	Nuclear localization signal|Nuclear export signal							69319.XP_008543308.1	1.46e-147	419	COG0638@1|root,KOG0184@2759|Eukaryota,38E3A@33154|Opisthokonta,3BHBT@33208|Metazoa,3CW0K@33213|Bilateria,41VZZ@6656|Arthropoda,3SG2C@50557|Insecta,46KAR@7399|Hymenoptera	33208|Metazoa	O	Proteasome subunit A N-terminal signature Add an annotation	Proteasome,Proteasome_A_N	PSMA3	GO:0000003,GO:0000502,GO:0002064,GO:0002065,GO:0002066,GO:0003006,GO:0003674,GO:0005488,GO:0005515,GO:0005575,GO:0005622,GO:0005623,GO:0005634,GO:0005654,GO:0005737,GO:0005829,GO:0005839,GO:0006464,GO:0006508,GO:0006511,GO:0006807,GO:0007276,GO:0007281,GO:0007292,GO:0008150,GO:0008152,GO:0009056,GO:0009057,GO:0009888,GO:0009987,GO:0010498,GO:0016579,GO:0019222,GO:0019538,GO:0019773,GO:0019899,GO:…	3.4.25.1	ko:K02727	K02727	PSMA3	20S proteasome subunit alpha 7							ko03050,map03050	M00337,M00340
1	152	Under	TRINITY_DN522_c0_g1_i1	1686	TRINITY_DN522_c0_g1_i1.p1	500	5prime_partial	6.77021e+07	429.226	26.0127	3.38347	7.68816	1.49263e-14	1.01793e-11	0	239.1	0	365.2	Endoplasmic reticulum	Signal peptide|Transmembrane domain							136037.KDR06612	2.09e-207	591	COG2124@1|root,KOG0156@2759|Eukaryota,39SXI@33154|Opisthokonta,3BG1W@33208|Metazoa,3D50Q@33213|Bilateria,41W2D@6656|Arthropoda,3SH03@50557|Insecta	33208|Metazoa	Q	cytochrome p450	p450	-	-	-	ko:K17855	K17855	CYP2L	cytochrome P450 family 2 subfamily L							-	-
1	153	Under	TRINITY_DN522_c0_g1_i2	2367	TRINITY_DN522_c0_g1_i2.p1	500	5prime_partial	15.4	244.344	3.94821	1.08894	3.62572	0.000288155	0.012471	6.7	87.5	1.4	127.9	Endoplasmic reticulum	Signal peptide|Transmembrane domain							136037.KDR06612	2.09e-207	591	COG2124@1|root,KOG0156@2759|Eukaryota,39SXI@33154|Opisthokonta,3BG1W@33208|Metazoa,3D50Q@33213|Bilateria,41W2D@6656|Arthropoda,3SH03@50557|Insecta	33208|Metazoa	Q	cytochrome p450	p450	-	-	-	ko:K17855	K17855	CYP2L	cytochrome P450 family 2 subfamily L							-	-
1	154	Under	TRINITY_DN5223_c0_g1_i1	5940	TRINITY_DN5223_c0_g1_i1.p1	1435	complete	2.3	111.757	1.17926	0.339671	3.47178	0.000517017	0.0194899	5.9	9.7	1.2	4.5	Cytoplasm|Nucleus	Nuclear localization signal							136037.KDR11240	0	2327	KOG1839@1|root,KOG1839@2759|Eukaryota,38HJZ@33154|Opisthokonta,3BEBG@33208|Metazoa,3CWQM@33213|Bilateria,41UZM@6656|Arthropoda,3SJ7W@50557|Insecta	33208|Metazoa	Z	mRNA-binding protein involved in proper cytoplasmic distribution of mitochondria	CLU,CLU_N,DUF727,TPR_10,TPR_12,eIF3_p135	CLUH	GO:0003674,GO:0003676,GO:0003723,GO:0003729,GO:0005488,GO:0005575,GO:0005622,GO:0005623,GO:0005737,GO:0005739,GO:0005740,GO:0005741,GO:0005783,GO:0005794,GO:0005819,GO:0005856,GO:0006996,GO:0007005,GO:0007275,GO:0007399,GO:0007405,GO:0008150,GO:0008283,GO:0008356,GO:0009987,GO:0012505,GO:0015630,GO:0016020,GO:0016043,GO:0017145,GO:0019867,GO:0019898,GO:0022008,GO:0030154,GO:0031090,GO:0031312,GO:…	-	ko:K03255	K03255	TIF31, CLU1	protein TIF31							-	-
1	155	Under	TRINITY_DN525_c0_g1_i9	2949	TRINITY_DN525_c0_g1_i9.p1	369	complete	7.71285e+06	127.525	22.8788	3.38372	6.76144	1.36626e-11	5.0406e-09	0	28.1	0	42.9	Cytoplasm|Nucleus	Nuclear export signal							136037.KDR17898	1.93e-199	566	COG0111@1|root,KOG0068@2759|Eukaryota,38GJA@33154|Opisthokonta,3BEWZ@33208|Metazoa,3CTJ7@33213|Bilateria,41VU6@6656|Arthropoda,3SGK1@50557|Insecta	33208|Metazoa	E	Belongs to the D-isomer specific 2-hydroxyacid dehydrogenase family	2-Hacid_dh,2-Hacid_dh_C	PHGDH	GO:0001505,GO:0003674,GO:0003824,GO:0004617,GO:0005575,GO:0005622,GO:0005623,GO:0005737,GO:0005829,GO:0006082,GO:0006091,GO:0006520,GO:0006541,GO:0006544,GO:0006563,GO:0006564,GO:0006566,GO:0006790,GO:0006805,GO:0006807,GO:0007049,GO:0007275,GO:0007399,GO:0007417,GO:0007420,GO:0008150,GO:0008152,GO:0008652,GO:0009055,GO:0009058,GO:0009064,GO:0009066,GO:0009069,GO:0009070,GO:0009410,GO:0009448,GO:…	1.1.1.399,1.1.1.95	ko:K00058	K00058	serA, PHGDH	D-3-phosphoglycerate dehydrogenase / 2-oxoglutarate reductase							ko00260,ko00680,ko01100,ko01120,ko01130,ko01200,ko01230,map00260,map00680,map01100,map01120,map01130,map01200,map01230	M00020
1	156	Under	TRINITY_DN53_c1_g1_i7	1167	TRINITY_DN53_c1_g1_i7.p1	80	complete	299.4	38.3014	8.22593	1.88373	4.36682	1.26068e-05	0.00108316	0.1	22.7	0.2	23.1	Cytoplasm|Nucleus								136037.KDR22997	3.71e-22	94.4	KOG1584@1|root,KOG1584@2759|Eukaryota,38FPD@33154|Opisthokonta,3BEBC@33208|Metazoa,3CTZN@33213|Bilateria,41YRC@6656|Arthropoda,3SZ0I@50557|Insecta	33208|Metazoa	S	Sulfotransferase domain	Sulfotransfer_1	-	GO:0003674,GO:0003824,GO:0005575,GO:0005622,GO:0005623,GO:0005737,GO:0005829,GO:0006790,GO:0006805,GO:0006950,GO:0006952,GO:0008146,GO:0008150,GO:0008152,GO:0009410,GO:0009605,GO:0009607,GO:0009617,GO:0009987,GO:0016740,GO:0016782,GO:0042221,GO:0042742,GO:0043207,GO:0044237,GO:0044424,GO:0044444,GO:0044464,GO:0050896,GO:0051704,GO:0051707,GO:0051716,GO:0051923,GO:0070887,GO:0071466,GO:0098542	2.8.2.4	ko:K01016,ko:K01025	K01016	SULT1E1, STE	estrone sulfotransferase	K01025	E2.8.2.-	0				ko00140,map00140	-
1	157	Under	TRINITY_DN542_c0_g1_i1	1178	TRINITY_DN542_c0_g1_i1.p1	195	complete	38.5	26.2985	5.26827	1.20945	4.35591	1.32518e-05	0.0011254	0.6	16.6	1.3	9.5	Mitochondrion	Mitochondrial transit peptide							136037.KDR22003	1.99e-125	358	COG0386@1|root,KOG1651@2759|Eukaryota,3A1XE@33154|Opisthokonta,3BJ9B@33208|Metazoa,3D2QQ@33213|Bilateria,41Z0T@6656|Arthropoda,3SKZY@50557|Insecta	33208|Metazoa	O	Belongs to the glutathione peroxidase family	GSHPx	GPX4	GO:0000003,GO:0001676,GO:0003674,GO:0003824,GO:0004601,GO:0004602,GO:0005488,GO:0005515,GO:0005575,GO:0005622,GO:0005623,GO:0005634,GO:0005635,GO:0005654,GO:0005737,GO:0005739,GO:0005829,GO:0006082,GO:0006325,GO:0006518,GO:0006575,GO:0006629,GO:0006631,GO:0006633,GO:0006644,GO:0006690,GO:0006749,GO:0006790,GO:0006793,GO:0006796,GO:0006807,GO:0006950,GO:0006979,GO:0006996,GO:0007276,GO:0007283,GO:…	1.11.1.12,1.11.1.9	ko:K00432,ko:K05361	K00432	gpx	glutathione peroxidase	K05361	GPX4	phospholipid-hydroperoxide glutathione peroxidase				ko00480,ko00590,ko04216,ko04918,map00480,map00590,map04216,map04918	-
1	158	Under	TRINITY_DN542_c0_g1_i8	1107	TRINITY_DN542_c0_g1_i8.p1	195	complete	2.5	28.6125	1.3046	0.376099	3.46876	0.000522867	0.0196119	8.6	14.4	1.2	2	Mitochondrion	Mitochondrial transit peptide							136037.KDR22003	1.99e-125	358	COG0386@1|root,KOG1651@2759|Eukaryota,3A1XE@33154|Opisthokonta,3BJ9B@33208|Metazoa,3D2QQ@33213|Bilateria,41Z0T@6656|Arthropoda,3SKZY@50557|Insecta	33208|Metazoa	O	Belongs to the glutathione peroxidase family	GSHPx	GPX4	GO:0000003,GO:0001676,GO:0003674,GO:0003824,GO:0004601,GO:0004602,GO:0005488,GO:0005515,GO:0005575,GO:0005622,GO:0005623,GO:0005634,GO:0005635,GO:0005654,GO:0005737,GO:0005739,GO:0005829,GO:0006082,GO:0006325,GO:0006518,GO:0006575,GO:0006629,GO:0006631,GO:0006633,GO:0006644,GO:0006690,GO:0006749,GO:0006790,GO:0006793,GO:0006796,GO:0006807,GO:0006950,GO:0006979,GO:0006996,GO:0007276,GO:0007283,GO:…	1.11.1.12,1.11.1.9	ko:K00432,ko:K05361	K00432	gpx	glutathione peroxidase	K05361	GPX4	phospholipid-hydroperoxide glutathione peroxidase				ko00480,ko00590,ko04216,ko04918,map00480,map00590,map04216,map04918	-
1	159	Under	TRINITY_DN5423_c0_g2_i1	2386	TRINITY_DN5423_c0_g2_i1.p1	284	complete	2.2	472.666	1.13979	0.318212	3.58185	0.000341173	0.0141924	65.9	102.9	20.1	32.1	Cell membrane|Lysosome/Vacuole	Signal peptide|Transmembrane domain							121225.PHUM332960-PA	3.55e-110	326	KOG3882@1|root,KOG3882@2759|Eukaryota,39VAJ@33154|Opisthokonta,3BN7T@33208|Metazoa,3E45R@33213|Bilateria,41YEJ@6656|Arthropoda,3SKHR@50557|Insecta	33208|Metazoa	S	Tetraspanin family	Tetraspannin	Tspan18	GO:0005575,GO:0005623,GO:0005886,GO:0005887,GO:0007154,GO:0007165,GO:0007166,GO:0008150,GO:0009987,GO:0016020,GO:0016021,GO:0023052,GO:0031224,GO:0031226,GO:0044425,GO:0044459,GO:0044464,GO:0050789,GO:0050794,GO:0050896,GO:0051716,GO:0065007,GO:0071944	-	ko:K17352,ko:K17353	K17352	TSPAN11	tetraspanin-11	K17353	TSPAN18	tetraspanin-18				-	-
1	160	Under	TRINITY_DN5480_c0_g1_i1	1449	TRINITY_DN5480_c0_g1_i1.p1	197	complete	2.5	30.6672	1.33172	0.358588	3.7138	0.00020417	0.00980427	6.7	11.7	1.5	2.3	Endoplasmic reticulum	Signal peptide							7070.TC008221-PA	4.97e-86	258	KOG1110@1|root,KOG1110@2759|Eukaryota,3A5JW@33154|Opisthokonta,3BHXS@33208|Metazoa,3D3Y7@33213|Bilateria,42A3N@6656|Arthropoda,3SZJ6@50557|Insecta	33208|Metazoa	S	Belongs to the cytochrome b5 family	Cyt-b5	PGRMC2	GO:0000003,GO:0000775,GO:0000902,GO:0000904,GO:0001556,GO:0001674,GO:0001775,GO:0002252,GO:0002263,GO:0002274,GO:0002275,GO:0002283,GO:0002366,GO:0002376,GO:0002443,GO:0002444,GO:0002446,GO:0003006,GO:0003008,GO:0003674,GO:0003707,GO:0005488,GO:0005496,GO:0005575,GO:0005576,GO:0005615,GO:0005622,GO:0005623,GO:0005634,GO:0005635,GO:0005694,GO:0005737,GO:0005768,GO:0005783,GO:0005819,GO:0005856,GO:…	-	ko:K17278	K17278	PGRMC1_2	membrane-associated progesterone receptor component							-	-
1	161	Under	TRINITY_DN570_c0_g1_i1	3380	TRINITY_DN570_c0_g1_i1.p1	1032	complete	4	37.8359	1.9982	0.574648	3.47726	0.00050656	0.0191599	2.3	6.6	1	3.3	Cytoplasm|Nucleus	Nuclear localization signal							121225.PHUM508900-PA	0	1188	KOG0603@1|root,KOG0603@2759|Eukaryota,3AMZM@33154|Opisthokonta,3BB8W@33208|Metazoa,3CWC7@33213|Bilateria,41XRX@6656|Arthropoda,3SG5Q@50557|Insecta,3ECNP@33342|Paraneoptera	33208|Metazoa	T	Lipopolysaccharide kinase (Kdo/WaaP) family	Pkinase,Pkinase_C	RPS6KA5	GO:0000003,GO:0000166,GO:0000228,GO:0000723,GO:0000803,GO:0000805,GO:0000902,GO:0000904,GO:0001817,GO:0001818,GO:0001932,GO:0001934,GO:0002218,GO:0002220,GO:0002223,GO:0002253,GO:0002376,GO:0002429,GO:0002682,GO:0002684,GO:0002757,GO:0002758,GO:0002764,GO:0002768,GO:0003006,GO:0003674,GO:0003824,GO:0004672,GO:0004674,GO:0004711,GO:0005488,GO:0005515,GO:0005524,GO:0005575,GO:0005622,GO:0005623,GO:…	2.7.11.1	ko:K04445,ko:K16510	K04445	MSK1, RPS6KA5	ribosomal protein S6 kinase alpha-5	K16510	MSK2, RPS6KA4	ribosomal protein S6 kinase alpha-4				ko04010,ko04261,ko04668,ko04713,ko04722,ko05200,ko05206,ko05219,map04010,map04261,map04668,map04713,map04722,map05200,map05206,map05219	-
1	162	Under	TRINITY_DN5879_c0_g1_i1	1682	TRINITY_DN5879_c0_g1_i1.p1	230	complete	8.7	289.638	3.11738	0.862575	3.61404	0.000301461	0.0128981	19.6	106.7	6.4	84.8	Cytoplasm	Nuclear export signal							7460.GB50655-PA	7.27e-103	304	KOG4064@1|root,KOG4064@2759|Eukaryota,38G67@33154|Opisthokonta,3BI7G@33208|Metazoa,3D0I1@33213|Bilateria,41YTW@6656|Arthropoda,3SM4P@50557|Insecta,46I79@7399|Hymenoptera	33208|Metazoa	E	Cysteine dioxygenase type I	CDO_I	CDO1	GO:0000096,GO:0000097,GO:0000098,GO:0001101,GO:0003674,GO:0003824,GO:0005488,GO:0005506,GO:0005575,GO:0005622,GO:0005623,GO:0005737,GO:0005829,GO:0005886,GO:0006082,GO:0006520,GO:0006534,GO:0006790,GO:0006805,GO:0006807,GO:0006810,GO:0006950,GO:0006952,GO:0006954,GO:0007275,GO:0007589,GO:0007595,GO:0008150,GO:0008152,GO:0008198,GO:0008652,GO:0009056,GO:0009058,GO:0009063,GO:0009069,GO:0009071,GO:…	1.13.11.20	ko:K00456	K00456	CDO1	cysteine dioxygenase							ko00270,ko00430,ko01100,map00270,map00430,map01100	-
1	163	Under	TRINITY_DN5900_c0_g1_i1	1463	TRINITY_DN5900_c0_g1_i1.p1	105	complete	4.3	459.992	2.10312	0.670206	3.13803	0.00170088	0.0466809	66	179.7	11.9	109.8	Endoplasmic reticulum								6669.EFX79937	6.85e-37	127	2BVGC@1|root,2S7T0@2759|Eukaryota,39M7Q@33154|Opisthokonta,3CNUV@33208|Metazoa,3E56U@33213|Bilateria,4211A@6656|Arthropoda	33208|Metazoa	S	Small integral membrane protein	DUF2615	SMIM14	GO:0005575,GO:0005622,GO:0005623,GO:0005737,GO:0005783,GO:0012505,GO:0043226,GO:0043227,GO:0043229,GO:0043231,GO:0044424,GO:0044444,GO:0044464	-	-										-	-
1	164	Under	TRINITY_DN59985_c0_g1_i1	736	TRINITY_DN59985_c0_g1_i1.p2	147	complete	2.9	23.5377	1.52537	0.460203	3.31456	0.000917878	0.0294229	10.3	20	2.2	4.4	Mitochondrion	Mitochondrial transit peptide							136037.KDR13501	4.25e-74	224	COG0360@1|root,KOG4708@2759|Eukaryota,3A40E@33154|Opisthokonta,3BRI7@33208|Metazoa,3D8VC@33213|Bilateria,42004@6656|Arthropoda,3SZFY@50557|Insecta	33208|Metazoa	J	ribosomal protein, S6	Ribosomal_S6	MRPS6	GO:0000313,GO:0000314,GO:0003674,GO:0003676,GO:0003723,GO:0003735,GO:0005198,GO:0005488,GO:0005575,GO:0005622,GO:0005623,GO:0005737,GO:0005739,GO:0005740,GO:0005743,GO:0005759,GO:0005761,GO:0005763,GO:0005840,GO:0006412,GO:0006414,GO:0006415,GO:0006518,GO:0006807,GO:0008150,GO:0008152,GO:0009058,GO:0009059,GO:0009987,GO:0010467,GO:0015935,GO:0016020,GO:0016043,GO:0019538,GO:0019843,GO:0019866,GO:…	-	ko:K02990,ko:K14383	K02990	RP-S6, MRPS6, rpsF	small subunit ribosomal protein S6	K14383	SLC5A3, SMIT	solute carrier family 5 (sodium/myo-inositol cotransporter), member 3				ko03010,map03010	M00178
1	165	Under	TRINITY_DN6096_c0_g1_i5	1966	TRINITY_DN6096_c0_g1_i5.p1	450	complete	2.8	720.45	1.4915	0.246753	6.04449	1.49881e-09	4.01556e-07	103.7	204.3	15.3	48.1	Mitochondrion	Mitochondrial transit peptide							136037.KDR15510	6.77e-262	725	COG2175@1|root,KOG3888@2759|Eukaryota,39RY8@33154|Opisthokonta,3BFB6@33208|Metazoa,3CXMQ@33213|Bilateria,41YU9@6656|Arthropoda,3SKJI@50557|Insecta	33208|Metazoa	I	activity. It is involved in the biological process described with oxidation-reduction process	DUF971,TauD	BBOX1	GO:0003674,GO:0003824,GO:0005488,GO:0005515,GO:0005575,GO:0005622,GO:0005623,GO:0005737,GO:0005829,GO:0006575,GO:0006577,GO:0006578,GO:0006807,GO:0008150,GO:0008152,GO:0008270,GO:0008336,GO:0009058,GO:0009437,GO:0009987,GO:0016491,GO:0016705,GO:0016706,GO:0034641,GO:0042398,GO:0042802,GO:0043167,GO:0043169,GO:0044237,GO:0044249,GO:0044271,GO:0044424,GO:0044444,GO:0044464,GO:0045329,GO:0046872,GO:…	1.14.11.1	ko:K00471	K00471	E1.14.11.1	gamma-butyrobetaine dioxygenase							ko00310,map00310	-
1	166	Under	TRINITY_DN61008_c0_g1_i1	4510	TRINITY_DN61008_c0_g1_i1.p1	1186	complete	4.2	66.0002	2.06436	0.623827	3.30919	0.000935671	0.0298685	2.9	9.3	1	7.8	Extracellular	Signal peptide							136037.KDR10358	0	1760	KOG3714@1|root,KOG3714@2759|Eukaryota,38H9H@33154|Opisthokonta,3BFXI@33208|Metazoa,3CRSI@33213|Bilateria,41W6T@6656|Arthropoda,3SG0U@50557|Insecta	33208|Metazoa	O	calcium ion binding. It is involved in the biological process described with proteolysis	Astacin,CUB,EGF_CA,FXa_inhibition	BMP1	GO:0001501,GO:0001502,GO:0001568,GO:0001704,GO:0001707,GO:0001885,GO:0001944,GO:0002064,GO:0002376,GO:0002520,GO:0003002,GO:0003158,GO:0003674,GO:0003824,GO:0004175,GO:0004222,GO:0004252,GO:0005488,GO:0005515,GO:0005518,GO:0005575,GO:0005576,GO:0006355,GO:0006357,GO:0006508,GO:0006807,GO:0007275,GO:0007369,GO:0007389,GO:0007498,GO:0008150,GO:0008152,GO:0008233,GO:0008236,GO:0008237,GO:0009653,GO:…	3.4.24.19,3.4.24.21	ko:K05502,ko:K08076,ko:K09608,ko:K13046,ko:K13047	K05502	BMP1, TLD	bone morphogenetic protein 1	K08076	E3.4.24.21	astacin	K09608	K13046	K13047	-	-
1	167	Under	TRINITY_DN61280_c0_g1_i1	1812	TRINITY_DN61280_c0_g1_i1.p1	557	complete	10.1	56.4046	3.33795	1.0272	3.24956	0.00115584	0.0348223	3	19.4	2.5	15.7	Extracellular	Signal peptide							136037.KDR24379	3.22e-147	442	COG2272@1|root,KOG1516@2759|Eukaryota,39Y33@33154|Opisthokonta,3BNNT@33208|Metazoa,3D46R@33213|Bilateria,429U3@6656|Arthropoda,3SZ8Y@50557|Insecta	136037.KDR24379|-	G	Belongs to the type-B carboxylesterase lipase family	-	-	-	-	-										-	-
1	168	Under	TRINITY_DN6222_c0_g1_i4	966	TRINITY_DN6222_c0_g1_i4.p1	252	complete	3.6	43.1439	1.84318	0.421768	4.37013	1.24175e-05	0.00107483	11.5	27.9	1.1	8.1	Cytoplasm								136037.KDR14275	9.07e-113	331	COG1028@1|root,KOG1205@2759|Eukaryota,38DQR@33154|Opisthokonta,3BJDJ@33208|Metazoa,3CUQ1@33213|Bilateria,41ZE3@6656|Arthropoda,3SM7H@50557|Insecta	33208|Metazoa	Q	Belongs to the short-chain dehydrogenases reductases (SDR) family	adh_short	DHRS11	GO:0000253,GO:0003008,GO:0003674,GO:0003824,GO:0004303,GO:0004745,GO:0005575,GO:0005622,GO:0005623,GO:0005737,GO:0006629,GO:0006694,GO:0006714,GO:0006716,GO:0006718,GO:0006720,GO:0006721,GO:0006726,GO:0006807,GO:0007600,GO:0007606,GO:0007608,GO:0008150,GO:0008152,GO:0008202,GO:0008299,GO:0008610,GO:0009058,GO:0009059,GO:0009987,GO:0010817,GO:0016063,GO:0016106,GO:0016114,GO:0016229,GO:0016491,GO:…	1.1.1.216	ko:K15890	K15890	FOHSDR	NADP+-dependent farnesol dehydrogenase							ko00900,ko00981,ko01130,map00900,map00981,map01130	-
1	169	Under	TRINITY_DN625_c0_g1_i19	1938	TRINITY_DN625_c0_g1_i19.p1	419	complete	7.4	51.1495	2.8939	0.861768	3.3581	0.000784815	0.0263223	3.3	15.9	3.1	10.3	Cytoplasm	Nuclear export signal							136037.KDR16133	6.25e-176	513	COG0584@1|root,KOG2421@2759|Eukaryota,38EQN@33154|Opisthokonta,3BBJ6@33208|Metazoa,3CUAZ@33213|Bilateria,41U7X@6656|Arthropoda,3SJXD@50557|Insecta	33208|Metazoa	C	starch binding. It is involved in the biological process described with lipid metabolic process	CBM_20,GDPD	GPCPD1	GO:0003674,GO:0003824,GO:0005488,GO:0005515,GO:0005575,GO:0005622,GO:0005623,GO:0005737,GO:0005829,GO:0006629,GO:0006644,GO:0006650,GO:0006793,GO:0006796,GO:0006873,GO:0007275,GO:0007517,GO:0007519,GO:0008081,GO:0008092,GO:0008150,GO:0008152,GO:0008889,GO:0009056,GO:0009395,GO:0009888,GO:0009987,GO:0014706,GO:0016042,GO:0016787,GO:0016788,GO:0017022,GO:0019637,GO:0019725,GO:0030002,GO:0030320,GO:…	3.1.4.2	ko:K18695	K18695	GPCPD1	glycerophosphocholine phosphodiesterase GPCPD1							ko00564,ko05231,map00564,map05231	-
1	170	Under	TRINITY_DN625_c0_g1_i29	1365	TRINITY_DN625_c0_g1_i29.p1	297	3prime_partial	7.3	42.0801	2.85845	0.78808	3.6271	0.00028662	0.0124544	4.1	19.5	1.5	13.4	Cytoplasm|Nucleus	Nuclear export signal							136037.KDR16133	8.67e-127	382	COG0584@1|root,KOG2421@2759|Eukaryota,38EQN@33154|Opisthokonta,3BBJ6@33208|Metazoa,3CUAZ@33213|Bilateria,41U7X@6656|Arthropoda,3SJXD@50557|Insecta	33208|Metazoa	C	starch binding. It is involved in the biological process described with lipid metabolic process	CBM_20,GDPD	GPCPD1	GO:0003674,GO:0003824,GO:0005488,GO:0005515,GO:0005575,GO:0005622,GO:0005623,GO:0005737,GO:0005829,GO:0006629,GO:0006644,GO:0006650,GO:0006793,GO:0006796,GO:0006873,GO:0007275,GO:0007517,GO:0007519,GO:0008081,GO:0008092,GO:0008150,GO:0008152,GO:0008889,GO:0009056,GO:0009395,GO:0009888,GO:0009987,GO:0014706,GO:0016042,GO:0016787,GO:0016788,GO:0017022,GO:0019637,GO:0019725,GO:0030002,GO:0030320,GO:…	3.1.4.2	ko:K18695	K18695	GPCPD1	glycerophosphocholine phosphodiesterase GPCPD1							ko00564,ko05231,map00564,map05231	-
1	171	Under	TRINITY_DN62502_c0_g1_i1	1411	TRINITY_DN62502_c0_g1_i1.p1	367	complete	2.7	79.2659	1.41212	0.319453	4.42044	9.85016e-06	0.000901129	17.2	33.1	2.7	15.7	Cell membrane	Transmembrane domain							121225.PHUM124530-PA	2.65e-145	422	2BWHM@1|root,2QWRS@2759|Eukaryota,38TKN@33154|Opisthokonta,3BD61@33208|Metazoa,3D59K@33213|Bilateria,41Y1P@6656|Arthropoda,3SIX5@50557|Insecta,3E7KN@33342|Paraneoptera	33208|Metazoa	P	Structural component of the gap junctions	Innexin	shakB	GO:0003254,GO:0003674,GO:0005215,GO:0005243,GO:0005575,GO:0005623,GO:0005886,GO:0005911,GO:0005921,GO:0006810,GO:0007043,GO:0007154,GO:0007165,GO:0007602,GO:0007610,GO:0007626,GO:0007630,GO:0008150,GO:0008344,GO:0009314,GO:0009416,GO:0009581,GO:0009582,GO:0009583,GO:0009605,GO:0009628,GO:0009881,GO:0009987,GO:0010496,GO:0010644,GO:0015267,GO:0016020,GO:0016043,GO:0016264,GO:0022607,GO:0022803,GO:…	-	ko:K22037	K22037									-	-
1	172	Under	TRINITY_DN64648_c0_g1_i1	1027	TRINITY_DN64648_c0_g1_i1.p1	82	complete	4	132.157	2.00013	0.54936	3.64083	0.000271764	0.0119957	30.3	77.9	5.9	37.4	Mitochondrion	Transmembrane domain							136037.KDR23224	5.72e-44	143	2DMTJ@1|root,2S65P@2759|Eukaryota,3A5SV@33154|Opisthokonta,3BTSH@33208|Metazoa,3D9I3@33213|Bilateria,420UV@6656|Arthropoda,3SZUP@50557|Insecta	33208|Metazoa	P	NADH dehydrogenase (Ubiquinone) 1 alpha subcomplex	B12D	-	-	-	ko:K03948	K03948	NDUFA4	NADH dehydrogenase (ubiquinone) 1 alpha subcomplex subunit 4							ko00190,ko01100,ko04714,ko04723,ko04932,ko05010,ko05012,ko05016,map00190,map01100,map04714,map04723,map04932,map05010,map05012,map05016	M00146
1	173	Under	TRINITY_DN6650_c0_g2_i3	2614	TRINITY_DN6650_c0_g2_i3.p1	614	complete	2	230.973	1.03459	0.185002	5.59229	2.24095e-08	4.38544e-06	30.6	44.3	2.5	9.9	Cytoplasm|Endoplasmic reticulum	Signal peptide							136037.KDR06741	1e-238	678	COG2303@1|root,KOG1238@2759|Eukaryota,38UEK@33154|Opisthokonta,3BBXZ@33208|Metazoa,3CRXP@33213|Bilateria,41U7M@6656|Arthropoda,3SFS2@50557|Insecta	33208|Metazoa	E	Belongs to the GMC oxidoreductase family	GMC_oxred_C,GMC_oxred_N	-	-	1.1.3.49,1.1.5.9	ko:K00115,ko:K21270	K00115	GLD	glucose 1-dehydrogenase (FAD, quinone)"	K21270	ChuaMOX	(R)-mandelonitrile oxidase				ko00030,ko01100,ko01110,ko01130,map00030,map01100,map01110,map01130	-
1	174	Under	TRINITY_DN6651_c0_g1_i1	6057	TRINITY_DN6651_c0_g1_i1.p1	1248	complete	2.6	73.5114	1.39794	0.397162	3.51982	0.000431833	0.0169902	3.4	6.2	0.7	2.2	Cytoplasm|Nucleus	Nuclear localization signal|Nuclear export signal							7213.XP_004518567.1	0	1043	KOG1974@1|root,KOG1974@2759|Eukaryota,39Y2G@33154|Opisthokonta,3BJYR@33208|Metazoa,3D457@33213|Bilateria,41WDR@6656|Arthropoda,3SJWA@50557|Insecta,45232@7147|Diptera	33208|Metazoa	L	Required for the production of circadian rhythms. The biological cycle depends on the rhythmic formation and nuclear localization of the TIM-PER complex. Light induces the degradation of TIM, which promotes elimination of PER. Nuclear activity of the heterodimer coordinatively regulates PER and TIM transcription through a negative feedback loop. Behaves as a negative element in circadian transcri…	TIMELESS	tim	GO:0000003,GO:0000122,GO:0001659,GO:0002027,GO:0003053,GO:0003674,GO:0005488,GO:0005515,GO:0005575,GO:0005622,GO:0005623,GO:0005634,GO:0005737,GO:0006355,GO:0006357,GO:0006606,GO:0006810,GO:0006886,GO:0006913,GO:0007275,GO:0007562,GO:0007610,GO:0007617,GO:0007618,GO:0007620,GO:0007622,GO:0007623,GO:0007626,GO:0008016,GO:0008062,GO:0008104,GO:0008134,GO:0008150,GO:0009314,GO:0009416,GO:0009453,GO:…	-	ko:K03155,ko:K12074	K03155	TIMELESS	timeless	K12074	TIM	timeless				ko04711,map04711	-
1	175	Under	TRINITY_DN6825_c0_g1_i3	1992	TRINITY_DN6825_c0_g1_i3.p1	566	complete	12.4	65.6062	3.63193	0.857596	4.23501	2.28545e-05	0.00178591	2.7	20.7	2.2	15.7	Cytoplasm	Peroxisomal targeting signal							136037.KDR21553	8.09e-216	617	COG0318@1|root,KOG1177@2759|Eukaryota,38ES8@33154|Opisthokonta,3BHR0@33208|Metazoa,3CTUM@33213|Bilateria,41UI4@6656|Arthropoda,3SINP@50557|Insecta	33208|Metazoa	I	activity. It is involved in the biological process described with metabolic process	AMP-binding,AMP-binding_C	ACSF2	GO:0003674,GO:0003824,GO:0003996,GO:0005575,GO:0005622,GO:0005623,GO:0005737,GO:0005739,GO:0005759,GO:0005777,GO:0006082,GO:0006139,GO:0006163,GO:0006629,GO:0006631,GO:0006633,GO:0006637,GO:0006725,GO:0006732,GO:0006753,GO:0006790,GO:0006793,GO:0006796,GO:0006807,GO:0008150,GO:0008152,GO:0008610,GO:0009058,GO:0009117,GO:0009150,GO:0009259,GO:0009987,GO:0015645,GO:0016053,GO:0016405,GO:0016874,GO:…	-	ko:K00666	K00666	K00666	fatty-acyl-CoA synthase							-	-
1	176	Under	TRINITY_DN6842_c1_g1_i9	5266	TRINITY_DN6842_c1_g1_i9.p1	1297	complete	4.2	255.634	2.07781	0.61884	3.35759	0.000786259	0.0263315	9.5	25.4	1.1	15.5	Cytoplasm								69319.XP_008548603.1	6.14e-192	590	COG2801@1|root,KOG0017@2759|Eukaryota,39TC6@33154|Opisthokonta,3BHT2@33208|Metazoa,3D2MB@33213|Bilateria,41VKT@6656|Arthropoda,3SQJD@50557|Insecta,46JND@7399|Hymenoptera	33208|Metazoa	L	nucleic acid binding	DUF1758,DUF1759,Peptidase_A17,rve	-	-	-	-										-	-
1	177	Under	TRINITY_DN702_c0_g1_i1	1460	TRINITY_DN702_c0_g1_i1.p1	115	complete	33	236.554	5.04422	1.42536	3.53891	0.000401787	0.016064	5.1	106.4	6.9	112	Extracellular	Signal peptide							13249.RPRC005016-PA	4.03e-12	65.9	2D0FJ@1|root,2SE18@2759|Eukaryota,3ACV1@33154|Opisthokonta,3BVSQ@33208|Metazoa,3DCKK@33213|Bilateria,421V4@6656|Arthropoda	2759|Eukaryota	S	Transcription activator MBF2	MBF2	-	-	-	-										-	-
1	178	Under	TRINITY_DN7034_c0_g1_i1	675	TRINITY_DN7034_c0_g1_i1.p1	150	complete	6.3	22.4808	2.66213	0.681135	3.90837	9.29195e-05	0.00562138	5.9	24.2	3.3	13	Cell membrane								136037.KDR18174	2.85e-38	134	2DEAA@1|root,2SDDE@2759|Eukaryota,3ADT7@33154|Opisthokonta,3BW2J@33208|Metazoa,3DCRB@33213|Bilateria,421N5@6656|Arthropoda,3SQ0E@50557|Insecta	33208|Metazoa	-	-	-	-	-	-	-										-	-
1	179	Under	TRINITY_DN70796_c0_g1_i2	1546	TRINITY_DN70796_c0_g1_i2.p1	455	complete	2.7	22.6158	1.42192	0.44679	3.18254	0.0014599	0.0414837	4.3	8	1.5	1.3	Nucleus	Nuclear localization signal							136037.KDR15729	1.46e-220	620	KOG1425@1|root,KOG1425@2759|Eukaryota,38SMH@33154|Opisthokonta,3BAI2@33208|Metazoa,3CUVS@33213|Bilateria,41VRU@6656|Arthropoda,3SJBF@50557|Insecta	33208|Metazoa	Z	Microfibrillar-associated protein	MFAP1	MFAP1	GO:0000375,GO:0000377,GO:0000381,GO:0000398,GO:0001527,GO:0003674,GO:0005488,GO:0005515,GO:0005575,GO:0005576,GO:0005622,GO:0005623,GO:0005634,GO:0006139,GO:0006396,GO:0006397,GO:0006725,GO:0006807,GO:0007346,GO:0008150,GO:0008152,GO:0008380,GO:0009987,GO:0010389,GO:0010467,GO:0010468,GO:0010564,GO:0016070,GO:0016071,GO:0019219,GO:0019222,GO:0031012,GO:0031323,GO:0032991,GO:0034641,GO:0043170,GO:…	-	ko:K13110	K13110	MFAP1	microfibrillar-associated protein 1							-	-
1	180	Under	TRINITY_DN70815_c0_g1_i1	849	TRINITY_DN70815_c0_g1_i1.p1	179	complete	3.1	27.1372	1.63612	0.506292	3.23157	0.00123114	0.0366009	9.3	19.6	3.3	4.6	Cytoplasm	Nuclear export signal							13249.RPRC003844-PA	5.45e-37	133	2CK3S@1|root,2SA4N@2759|Eukaryota,3AA20@33154|Opisthokonta,3CBF4@33208|Metazoa,3DSQB@33213|Bilateria,428TM@6656|Arthropoda,3SY9U@50557|Insecta,3EDX4@33342|Paraneoptera	33208|Metazoa	-	-	-	-	-	-	-										-	-
1	181	Under	TRINITY_DN70863_c0_g1_i1	952	TRINITY_DN70863_c0_g1_i1.p1	234	complete	3.4	118.753	1.75651	0.557804	3.14898	0.00163844	0.0453543	33.8	74.2	9.6	35.1	Cytoplasm|Nucleus	Nuclear export signal							136037.KDR07186	9.01e-164	458	KOG0181@1|root,KOG0181@2759|Eukaryota,38DNP@33154|Opisthokonta,3BAR7@33208|Metazoa,3D1XM@33213|Bilateria,41XUA@6656|Arthropoda,3SJHM@50557|Insecta	33208|Metazoa	O	The proteasome is a multicatalytic proteinase complex which is characterized by its ability to cleave peptides with Arg, Phe, Tyr, Leu, and Glu adjacent to the leaving group at neutral or slightly basic pH	Proteasome,Proteasome_A_N	PSMA2	GO:0000502,GO:0000932,GO:0001775,GO:0002252,GO:0002263,GO:0002274,GO:0002275,GO:0002283,GO:0002366,GO:0002376,GO:0002443,GO:0002444,GO:0002446,GO:0003674,GO:0005488,GO:0005515,GO:0005575,GO:0005576,GO:0005622,GO:0005623,GO:0005634,GO:0005654,GO:0005737,GO:0005829,GO:0005839,GO:0006464,GO:0006508,GO:0006511,GO:0006807,GO:0006810,GO:0006887,GO:0006955,GO:0008150,GO:0008152,GO:0009056,GO:0009057,GO:…	3.4.25.1	ko:K02726	K02726	PSMA2	20S proteasome subunit alpha 2							ko03050,map03050	M00337,M00340
1	182	Under	TRINITY_DN70900_c0_g1_i1	2293	TRINITY_DN70900_c0_g1_i1.p1	291	complete	2.5	370.478	1.35028	0.364406	3.70543	0.000211036	0.0100198	48.3	90.9	7.4	50.7	Nucleus	Nuclear localization signal							136037.KDR21486	3.01e-160	453	KOG0837@1|root,KOG0837@2759|Eukaryota,38XJH@33154|Opisthokonta,3BFP2@33208|Metazoa,3CW57@33213|Bilateria,41Z3G@6656|Arthropoda,3SM3N@50557|Insecta	33208|Metazoa	K	sequence-specific DNA binding. It is involved in the biological process described with regulation of transcription, DNA-templated	Jun,bZIP_1	JUN	GO:0000003,GO:0000122,GO:0000165,GO:0000228,GO:0000302,GO:0000785,GO:0000790,GO:0000791,GO:0000976,GO:0000977,GO:0000978,GO:0000980,GO:0000981,GO:0000982,GO:0000987,GO:0000988,GO:0000989,GO:0001012,GO:0001067,GO:0001076,GO:0001077,GO:0001085,GO:0001102,GO:0001158,GO:0001190,GO:0001228,GO:0001525,GO:0001558,GO:0001568,GO:0001654,GO:0001700,GO:0001736,GO:0001738,GO:0001745,GO:0001751,GO:0001752,GO:…	-	ko:K04448,ko:K04449	K04448	JUN	transcription factor AP-1	K04449	JUND	transcription factor jun-D				ko01522,ko04010,ko04012,ko04013,ko04024,ko04137,ko04210,ko04214,ko04310,ko04380,ko04510,ko04530,ko04620,ko04621,ko04624,ko04657,ko04658,ko04659,ko04660,ko04662,ko04668,ko04722,ko04912,ko04915,ko04921,ko04926,ko04932,ko04933,ko05030,ko05031,ko05120,ko05132,ko05133,ko05140,ko05142,ko05161,ko05164,ko05166,ko05167,ko05168,ko05169,ko05200,ko05203,ko05210,ko05211,ko05224,ko05231,ko05321,ko05323,ko05418…	-
1	183	Under	TRINITY_DN7092_c0_g1_i14	1765	TRINITY_DN7092_c0_g1_i14.p1	519	complete	15	12362.8	3.90245	1.18353	3.2973	0.000976185	0.0309327	477.5	4441.5	276.1	3380.4	Extracellular|Lysosome/Vacuole	Signal peptide							136037.KDR07975	7.18e-252	705	COG0753@1|root,KOG0047@2759|Eukaryota,38BMC@33154|Opisthokonta,3BFAV@33208|Metazoa,3CSMT@33213|Bilateria,41UVT@6656|Arthropoda,3SHKQ@50557|Insecta	33208|Metazoa	P	Occurs in almost all aerobically respiring organisms and serves to protect cells from the toxic effects of hydrogen peroxide	Catalase,Catalase-rel	CAT	GO:0000166,GO:0000302,GO:0000323,GO:0001101,GO:0001655,GO:0001657,GO:0001666,GO:0001775,GO:0001822,GO:0001823,GO:0002252,GO:0002263,GO:0002274,GO:0002275,GO:0002283,GO:0002366,GO:0002376,GO:0002443,GO:0002444,GO:0002446,GO:0002682,GO:0003007,GO:0003674,GO:0003824,GO:0004046,GO:0004096,GO:0004601,GO:0005102,GO:0005488,GO:0005515,GO:0005575,GO:0005576,GO:0005615,GO:0005622,GO:0005623,GO:0005737,GO:…	1.11.1.6	ko:K03781	K03781	katE, CAT, catB, srpA	catalase							ko00380,ko00630,ko01110,ko01130,ko01200,ko04011,ko04016,ko04068,ko04146,ko04211,ko04212,ko04213,ko05014,map00380,map00630,map01110,map01130,map01200,map04011,map04016,map04068,map04146,map04211,map04212,map04213,map05014	M00532
1	184	Under	TRINITY_DN7099_c0_g1_i1	1463	TRINITY_DN7099_c0_g1_i1.p1	424	complete	5.4	9.14351	2.42289	0.711225	3.40664	0.000657677	0.0231628	1.1	4.1	0.7	1.3	Cytoplasm								7425.NV15830-PA	6.06e-196	556	COG1820@1|root,KOG3892@2759|Eukaryota,38BYR@33154|Opisthokonta,3BEM2@33208|Metazoa,3CYE7@33213|Bilateria,41W5W@6656|Arthropoda,3SFMM@50557|Insecta,46FFS@7399|Hymenoptera	33208|Metazoa	G	Amidohydrolase family	Amidohydro_1	AMDHD2	GO:0003674,GO:0003824,GO:0005575,GO:0005622,GO:0005623,GO:0005634,GO:0005737,GO:0005829,GO:0006040,GO:0006044,GO:0006046,GO:0006047,GO:0006048,GO:0006054,GO:0006082,GO:0006139,GO:0006725,GO:0006793,GO:0006807,GO:0008150,GO:0008152,GO:0008448,GO:0009056,GO:0009058,GO:0009225,GO:0009226,GO:0009987,GO:0016054,GO:0016787,GO:0016810,GO:0016811,GO:0016999,GO:0017001,GO:0017144,GO:0018130,GO:0019213,GO:…	3.5.1.25	ko:K01443	K01443	nagA, AMDHD2	N-acetylglucosamine-6-phosphate deacetylase							ko00520,ko01130,map00520,map01130	-
1	185	Under	TRINITY_DN71062_c0_g1_i1	915	TRINITY_DN71062_c0_g1_i1.p1	182	complete	3.1	15.6407	1.65508	0.532014	3.11097	0.00186471	0.0497809	4.9	10.6	2.6	0.8	Cytoplasm								136037.KDR10884	3.13e-97	286	COG5126@1|root,KOG0028@2759|Eukaryota,38C1B@33154|Opisthokonta,3BB2J@33208|Metazoa,3D0FW@33213|Bilateria,41YPI@6656|Arthropoda,3SM11@50557|Insecta	33208|Metazoa	DZ	Calcium ion binding	EF-hand_1,EF-hand_5,EF-hand_6,EF-hand_7,EF-hand_8	CETN1	GO:0000003,GO:0000086,GO:0000109,GO:0000226,GO:0000278,GO:0000715,GO:0000922,GO:0003674,GO:0005488,GO:0005509,GO:0005515,GO:0005575,GO:0005622,GO:0005623,GO:0005634,GO:0005654,GO:0005737,GO:0005813,GO:0005814,GO:0005815,GO:0005819,GO:0005829,GO:0005856,GO:0005929,GO:0006139,GO:0006259,GO:0006281,GO:0006289,GO:0006294,GO:0006725,GO:0006807,GO:0006950,GO:0006974,GO:0006996,GO:0007010,GO:0007017,GO:…	-	ko:K10840,ko:K16465	K10840	CETN2	centrin-2	K16465	CETN1	centrin-1				ko03420,map03420	-
1	186	Under	TRINITY_DN71230_c0_g1_i2	1112	TRINITY_DN71230_c0_g1_i2.p1	278	complete	49.2	39.8785	5.62102	1.21578	4.62338	3.7753e-06	0.000412443	0.8	24.5	0.6	28.5	Cytoplasm								10224.XP_002738455.1	7.12e-98	295	COG5285@1|root,2S0FA@2759|Eukaryota,3A3DD@33154|Opisthokonta,3BRST@33208|Metazoa,3DBAU@33213|Bilateria	33208|Metazoa	Q	Phytanoyl-CoA dioxygenase (PhyH)	PhyH	-	-	-	-										-	-
1	187	Under	TRINITY_DN71291_c0_g1_i2	787	TRINITY_DN71291_c0_g1_i2.p1	241	complete	135.4	17.4607	7.08058	1.35103	5.24086	1.59826e-07	2.59943e-05	0.2	18.1	0.4	16.6	Cytoplasm	Nuclear localization signal							136037.KDR20250	3.75e-97	290	KOG0406@1|root,KOG0406@2759|Eukaryota,38D3D@33154|Opisthokonta,3BJ5E@33208|Metazoa,3CXTB@33213|Bilateria,41YJZ@6656|Arthropoda,3SJYR@50557|Insecta	33208|Metazoa	O	Glutathione transferase activity. It is involved in the biological process described with metabolic process	GST_C,GST_C_2,GST_C_3,GST_N_3	GSTO1	GO:0000302,GO:0003674,GO:0003824,GO:0004364,GO:0004734,GO:0005488,GO:0005515,GO:0005575,GO:0005576,GO:0005604,GO:0005622,GO:0005623,GO:0005634,GO:0005635,GO:0005737,GO:0005739,GO:0005829,GO:0005975,GO:0005996,GO:0006082,GO:0006518,GO:0006575,GO:0006725,GO:0006726,GO:0006728,GO:0006732,GO:0006749,GO:0006766,GO:0006767,GO:0006790,GO:0006805,GO:0006807,GO:0006873,GO:0006874,GO:0006875,GO:0006937,GO:…	1.5.4.1,2.5.1.18	ko:K00310,ko:K00799	K00310	SE	pyrimidodiazepine synthase	K00799	GST, gst	glutathione S-transferase				ko00480,ko00790,ko00980,ko00982,ko00983,ko01524,ko05200,ko05204,ko05225,ko05418,map00480,map00790,map00980,map00982,map00983,map01524,map05200,map05204,map05225,map05418	-
1	188	Under	TRINITY_DN7130_c0_g1_i1	3171	TRINITY_DN7130_c0_g1_i1.p1	606	complete	13.9	178.379	3.79789	0.992412	3.82693	0.000129754	0.00690333	4	46.6	1.8	70.9	Cytoplasm|Endoplasmic reticulum	Signal peptide							136037.KDR19978	5.37e-161	479	COG2303@1|root,KOG1238@2759|Eukaryota,38UEK@33154|Opisthokonta,3BXM2@33208|Metazoa,3DD9T@33213|Bilateria,42256@6656|Arthropoda,3SJ1U@50557|Insecta	33208|Metazoa	E	GMC oxidoreductase	GMC_oxred_C,GMC_oxred_N	-	-	1.1.3.49	ko:K21270	K21270	ChuaMOX	(R)-mandelonitrile oxidase							-	-
1	189	Under	TRINITY_DN71426_c0_g1_i1	1017	TRINITY_DN71426_c0_g1_i1.p1	232	complete	3.6	118.452	1.86058	0.565704	3.28896	0.00100559	0.0315193	29.6	69	7.9	33.5	Cytoplasm|Nucleus	Nuclear export signal							136037.KDR18713	1.36e-132	379	KOG0174@1|root,KOG0174@2759|Eukaryota,38EH1@33154|Opisthokonta,3BA9I@33208|Metazoa,3CXGZ@33213|Bilateria,41VA3@6656|Arthropoda,3SHW3@50557|Insecta	33208|Metazoa	O	threonine-type endopeptidase activity. It is involved in the biological process described with proteolysis involved in cellular protein catabolic process	Proteasome	PSMB6	GO:0000502,GO:0001889,GO:0002376,GO:0002520,GO:0003008,GO:0003012,GO:0003674,GO:0003824,GO:0004175,GO:0005488,GO:0005575,GO:0005622,GO:0005623,GO:0005634,GO:0005654,GO:0005737,GO:0005829,GO:0005839,GO:0006464,GO:0006508,GO:0006511,GO:0006807,GO:0007275,GO:0008150,GO:0008152,GO:0008233,GO:0009056,GO:0009057,GO:0009605,GO:0009607,GO:0009615,GO:0009617,GO:0009628,GO:0009987,GO:0010033,GO:0010243,GO:…	3.4.25.1	ko:K02738,ko:K02741	K02738	PSMB6	20S proteasome subunit beta 1	K02741	PSMB9, LMP2	20S proteasome subunit beta 9				ko03050,map03050	M00337,M00340
1	190	Under	TRINITY_DN7262_c0_g1_i4	2412	TRINITY_DN7262_c0_g1_i4.p1	346	complete	2.3	155.249	1.17298	0.306955	3.82132	0.000132737	0.00704538	21.1	33.4	5.3	9.3	Cytoplasm								136037.KDR10178	3.52e-235	649	COG0462@1|root,KOG1448@2759|Eukaryota,38CQV@33154|Opisthokonta,3BD0G@33208|Metazoa,3CU7N@33213|Bilateria,41VRM@6656|Arthropoda,3SHV0@50557|Insecta	33208|Metazoa	EF	ribose phosphate diphosphokinase activity. It is involved in the biological process described with	Pribosyl_synth,Pribosyltran_N	PRPS2	GO:0000166,GO:0000287,GO:0001882,GO:0001883,GO:0002189,GO:0003674,GO:0003824,GO:0004749,GO:0005488,GO:0005515,GO:0005524,GO:0005575,GO:0005622,GO:0005623,GO:0005737,GO:0005829,GO:0006015,GO:0006082,GO:0006139,GO:0006144,GO:0006163,GO:0006164,GO:0006167,GO:0006220,GO:0006221,GO:0006725,GO:0006753,GO:0006793,GO:0006796,GO:0006807,GO:0007275,GO:0007399,GO:0008144,GO:0008150,GO:0008152,GO:0009058,GO:…	2.7.6.1	ko:K00948	K00948	PRPS, prsA	ribose-phosphate pyrophosphokinase							ko00030,ko00230,ko01100,ko01110,ko01120,ko01130,ko01200,ko01230,map00030,map00230,map01100,map01110,map01120,map01130,map01200,map01230	M00005
1	191	Under	TRINITY_DN733_c0_g1_i4	2936	TRINITY_DN733_c0_g1_i4.p1	728	complete	2.3	99.5913	1.21798	0.281222	4.33104	1.48408e-05	0.00123244	10.7	17.5	2.7	3.7	Cytoplasm								136037.KDR20343	6.71e-238	689	COG0515@1|root,KOG1187@2759|Eukaryota,38G1T@33154|Opisthokonta,3BCM7@33208|Metazoa,3CUYA@33213|Bilateria,41XWH@6656|Arthropoda,3SJ80@50557|Insecta	33208|Metazoa	T	It is involved in the biological process described with protein phosphorylation	Death,Pkinase,Pkinase_Tyr	IRAK1	GO:0000165,GO:0000187,GO:0000578,GO:0001817,GO:0001819,GO:0001932,GO:0001934,GO:0001959,GO:0002164,GO:0002218,GO:0002221,GO:0002224,GO:0002237,GO:0002253,GO:0002376,GO:0002520,GO:0002682,GO:0002684,GO:0002753,GO:0002755,GO:0002757,GO:0002758,GO:0002764,GO:0003002,GO:0003674,GO:0003824,GO:0004672,GO:0004674,GO:0004704,GO:0005102,GO:0005126,GO:0005149,GO:0005488,GO:0005515,GO:0005575,GO:0005622,GO:…	2.7.11.1	ko:K04730	K04730	IRAK1	interleukin-1 receptor-associated kinase 1							ko04010,ko04064,ko04620,ko04624,ko04722,ko05133,ko05140,ko05142,ko05145,ko05152,ko05162,ko05169,map04010,map04064,map04620,map04624,map04722,map05133,map05140,map05142,map05145,map05152,map05162,map05169	M00686
1	192	Under	TRINITY_DN734_c3_g1_i3	647	TRINITY_DN734_c3_g1_i3.p1	111	complete	24.2	24.4168	4.59957	1.47488	3.1186	0.00181711	0.048858	1.9	40.8	2.2	64.2	Cell membrane								136037.KDR09582	6.67e-30	116	KOG0255@1|root,KOG0255@2759|Eukaryota,39Z28@33154|Opisthokonta,3BM9Y@33208|Metazoa,3D53J@33213|Bilateria,41YG9@6656|Arthropoda,3SJ89@50557|Insecta	33208|Metazoa	S	Transmembrane transporter activity. It is involved in the biological process described with transmembrane transport	MFS_1,Sugar_tr	-	GO:0003674,GO:0005215,GO:0005575,GO:0005623,GO:0005886,GO:0005887,GO:0006810,GO:0006811,GO:0006820,GO:0008150,GO:0008509,GO:0008514,GO:0015075,GO:0015711,GO:0016020,GO:0016021,GO:0022857,GO:0031224,GO:0031226,GO:0034220,GO:0044425,GO:0044459,GO:0044464,GO:0051179,GO:0051234,GO:0055085,GO:0071702,GO:0071944,GO:0098656	-	-										-	-
1	193	Under	TRINITY_DN7342_c0_g1_i6	1830	TRINITY_DN7342_c0_g1_i6.p1	263	5prime_partial	6.3	34.6826	2.65763	0.541217	4.91047	9.08584e-07	0.000121712	2.8	12.3	1.7	4.2	Nucleus	Nuclear localization signal							136037.KDR16750	3.24e-41	147	2EAQF@1|root,2SGXI@2759|Eukaryota,3ADMS@33154|Opisthokonta,3BW4B@33208|Metazoa,3DC5Z@33213|Bilateria,421M2@6656|Arthropoda,3SPTJ@50557|Insecta	33208|Metazoa	-	-	-	-	-	-	-										-	-
1	194	Under	TRINITY_DN73672_c0_g1_i1	988	TRINITY_DN73672_c0_g1_i1.p1	284	complete	109.5	23.0589	6.77433	1.08839	6.22419	4.84044e-10	1.43334e-07	0.2	18.6	0.3	3.8	Cytoplasm|Nucleus	Nuclear localization signal							136037.KDR07295	5.69e-23	98.6	KOG3002@1|root,KOG3002@2759|Eukaryota,3APMS@33154|Opisthokonta,3C2HS@33208|Metazoa,3DHZK@33213|Bilateria,4235P@6656|Arthropoda	33208|Metazoa	O	E3 ubiquitin-protein ligase that mediates ubiquitination and subsequent proteasomal degradation of target proteins. E3 ubiquitin ligases accept ubiquitin from an E2 ubiquitin- conjugating enzyme in the form of a thioester and then directly transfers the ubiquitin to targeted substrates	Sina	-	-	2.3.2.27	ko:K04506	K04506	SIAH1	E3 ubiquitin-protein ligase SIAH1							ko04013,ko04115,ko04120,ko04310,map04013,map04115,map04120,map04310	-
1	195	Under	TRINITY_DN7480_c0_g2_i1	9637	TRINITY_DN7480_c0_g2_i1.p1	2906	complete	2.2	320.539	1.10501	0.312251	3.53886	0.000401866	0.016064	10.7	16.4	1	7.3	Extracellular	Signal peptide							69319.XP_008544837.1	0	1867	KOG1217@1|root,KOG1217@2759|Eukaryota,38BUP@33154|Opisthokonta,3BA2W@33208|Metazoa,3CUNH@33213|Bilateria,41VP3@6656|Arthropoda,3SGWN@50557|Insecta,46JDC@7399|Hymenoptera	33208|Metazoa	T	Complement Clr-like EGF-like	EGF_CA,FXa_inhibition,Sushi,TB,hEGF	FBN1	GO:0000902,GO:0000904,GO:0001501,GO:0001527,GO:0001654,GO:0001655,GO:0001656,GO:0001822,GO:0001932,GO:0001934,GO:0002682,GO:0002683,GO:0002761,GO:0002762,GO:0003674,GO:0005102,GO:0005178,GO:0005179,GO:0005198,GO:0005201,GO:0005488,GO:0005509,GO:0005515,GO:0005539,GO:0005575,GO:0005576,GO:0005604,GO:0005615,GO:0005622,GO:0005623,GO:0005737,GO:0005783,GO:0005788,GO:0005975,GO:0005996,GO:0006006,GO:…	-	ko:K06825,ko:K17307	K06825	FBN1	fibrillin 1	K17307	FBLN1_2	fibulin 1/2				-	-
1	196	Under	TRINITY_DN756_c1_g1_i25	3873	TRINITY_DN756_c1_g1_i25.p1	998	complete	2.4	296.753	1.26013	0.263618	4.78015	1.75164e-06	0.000213085	23.4	38.1	2.7	2.4	Cytoplasm|Lysosome/Vacuole	Nuclear export signal							136037.KDR08837	0	1056	KOG2308@1|root,KOG2308@2759|Eukaryota,38FWE@33154|Opisthokonta,3BDJ7@33208|Metazoa,3CUIS@33213|Bilateria,41VV8@6656|Arthropoda,3SGCQ@50557|Insecta	33208|Metazoa	IU	Metal ion binding	DDHD,SAM_1,WWE	SEC23IP	GO:0000003,GO:0001675,GO:0003006,GO:0003008,GO:0003674,GO:0003824,GO:0004620,GO:0004806,GO:0005575,GO:0005622,GO:0005623,GO:0005737,GO:0005783,GO:0005793,GO:0005794,GO:0005798,GO:0005801,GO:0005815,GO:0005829,GO:0005856,GO:0006629,GO:0006638,GO:0006639,GO:0006641,GO:0006726,GO:0006807,GO:0006810,GO:0006886,GO:0006888,GO:0006900,GO:0006901,GO:0006903,GO:0006996,GO:0007030,GO:0007276,GO:0007281,GO:…	-	ko:K16545	K16545	DDHD2	phospholipase DDHD2							-	-
1	197	Under	TRINITY_DN7602_c0_g2_i1	1624	TRINITY_DN7602_c0_g2_i1.p1	534	5prime_partial	4.2	18.7682	2.06353	0.571506	3.61069	0.000305382	0.0130024	2.4	7	1.3	1.6	Nucleus	Nuclear localization signal							7029.ACYPI53939-PA	5.99e-166	493	28P4Z@1|root,2QVRU@2759|Eukaryota,38G0P@33154|Opisthokonta,3BGQ6@33208|Metazoa,3CZYD@33213|Bilateria,4224W@6656|Arthropoda,3SNFM@50557|Insecta	33208|Metazoa	S	piggyBac transposable element-derived protein	DDE_Tnp_1_7	-	-	-	ko:K19679	K19679	IFT74	intraflagellar transport protein 74							-	-
1	198	Under	TRINITY_DN7749_c0_g1_i1	1224	TRINITY_DN7749_c0_g1_i1.p1	272	complete	2.1	82.3048	1.05662	0.322545	3.27589	0.0010533	0.0325613	24.8	35	2.1	5.2	Cytoplasm|Nucleus	Nuclear localization signal							136037.KDR13050	4.25e-120	354	KOG3183@1|root,KOG3183@2759|Eukaryota,39R5H@33154|Opisthokonta,3BC8X@33208|Metazoa,3CR5C@33213|Bilateria,41Z4V@6656|Arthropoda,3SM5R@50557|Insecta	33208|Metazoa	S	zinc ion binding	Apc13p,zf-AN1	ZFAND1	-	-	ko:K07059,ko:K12456	K07059	K07059	uncharacterized protein	K12456	APC13	anaphase-promoting complex subunit 13				ko04110,ko04114,ko04120,ko04914,map04110,map04114,map04120,map04914	M00389
1	199	Under	TRINITY_DN784_c0_g2_i3	2591	TRINITY_DN784_c0_g2_i3.p1	631	complete	3.3	149.167	1.71166	0.36517	4.68731	2.76823e-06	0.000314641	14.4	33.6	5.8	12.6	Endoplasmic reticulum	Signal peptide|Transmembrane domain							136037.KDR19518	7.58e-260	755	COG0652@1|root,KOG4029@1|root,KOG0885@2759|Eukaryota,KOG4029@2759|Eukaryota,38DAQ@33154|Opisthokonta,3BACF@33208|Metazoa,3CWEK@33213|Bilateria,41TMH@6656|Arthropoda,3SGWG@50557|Insecta	33208|Metazoa	O	Peptidyl-prolyl cis-trans isomerase activity. It is involved in the biological process described with protein folding	Pro_isomerase	CWC27	GO:0000375,GO:0000377,GO:0000398,GO:0000413,GO:0003674,GO:0003755,GO:0003824,GO:0005575,GO:0005622,GO:0005623,GO:0005634,GO:0005654,GO:0005681,GO:0006139,GO:0006396,GO:0006397,GO:0006464,GO:0006725,GO:0006807,GO:0008150,GO:0008152,GO:0008380,GO:0009987,GO:0010467,GO:0016070,GO:0016071,GO:0016853,GO:0016859,GO:0018193,GO:0018208,GO:0019538,GO:0031974,GO:0031981,GO:0032991,GO:0034641,GO:0036211,GO:…	5.2.1.8	ko:K12737	K12737	SDCCAG10	peptidyl-prolyl cis-trans isomerase SDCCAG10							-	-
1	200	Under	TRINITY_DN787_c0_g1_i1	3421	TRINITY_DN787_c0_g1_i1.p1	973	complete	2.7	85.4203	1.41278	0.387734	3.6437	0.000268749	0.0119658	7.2	13	3	2.6	Nucleus	Nuclear localization signal							132113.XP_003493157.1	6.91e-238	706	KOG0667@1|root,KOG0670@2759|Eukaryota,38BTX@33154|Opisthokonta,3BFA4@33208|Metazoa,3CT64@33213|Bilateria,41U8K@6656|Arthropoda,3SJUW@50557|Insecta,46I2E@7399|Hymenoptera	33208|Metazoa	T	Protein tyrosine kinase	Pkinase	PRPF4B	GO:0000375,GO:0000377,GO:0000398,GO:0003674,GO:0003824,GO:0004672,GO:0005575,GO:0005622,GO:0005623,GO:0005634,GO:0005654,GO:0005681,GO:0005694,GO:0006139,GO:0006396,GO:0006397,GO:0006464,GO:0006468,GO:0006725,GO:0006793,GO:0006796,GO:0006807,GO:0008150,GO:0008152,GO:0008380,GO:0009987,GO:0010467,GO:0016070,GO:0016071,GO:0016301,GO:0016310,GO:0016604,GO:0016607,GO:0016740,GO:0016772,GO:0016773,GO:…	2.7.11.1	ko:K08827	K08827	PRPF4B	serine/threonine-protein kinase PRP4							-	-
1	201	Under	TRINITY_DN802_c0_g1_i3	5958	TRINITY_DN802_c0_g1_i3.p1	1393	complete	216.3	27.7159	7.75679	1.76897	4.38491	1.16035e-05	0.00103626	0	3.1	0	2.9	Nucleus	Nuclear localization signal							136037.KDR18510	0	2323	KOG1513@1|root,KOG1513@2759|Eukaryota,38I2T@33154|Opisthokonta,3BBYS@33208|Metazoa,3CVTP@33213|Bilateria,41W4J@6656|Arthropoda,3SHT4@50557|Insecta	33208|Metazoa	KT	It is involved in the biological process described with regulation of transcription, DNA-templated	AAA_34,Helicase_C_4	sno	GO:0000003,GO:0001708,GO:0002009,GO:0002119,GO:0002164,GO:0002165,GO:0003002,GO:0003006,GO:0005575,GO:0005622,GO:0005623,GO:0005634,GO:0006355,GO:0006357,GO:0007154,GO:0007165,GO:0007166,GO:0007219,GO:0007275,GO:0007389,GO:0007444,GO:0007447,GO:0007450,GO:0007472,GO:0007476,GO:0007548,GO:0007552,GO:0007560,GO:0008150,GO:0008587,GO:0009653,GO:0009791,GO:0009886,GO:0009887,GO:0009888,GO:0009889,GO:…	-	-										-	-
1	202	Under	TRINITY_DN8168_c0_g1_i2	1465	TRINITY_DN8168_c0_g1_i2.p1	347	complete	208.8	16.2524	7.70574	1.42976	5.38953	7.06425e-08	1.23241e-05	0	7.8	0	5.9	Cytoplasm	Nuclear localization signal							136037.KDR11438	9.34e-59	194	2BVGF@1|root,2S28E@2759|Eukaryota,3A58E@33154|Opisthokonta,3BRPX@33208|Metazoa,3D8J6@33213|Bilateria,4206X@6656|Arthropoda	33208|Metazoa	-	-	C2	-	-	-	-										-	-
1	203	Under	TRINITY_DN82467_c0_g1_i1	3260	TRINITY_DN82467_c0_g1_i1.p1	628	complete	7.2	503.863	2.85612	0.500971	5.70117	1.18989e-08	2.59171e-06	19.7	96	10.3	22.1	Cell membrane	Signal peptide|Transmembrane domain							136037.KDR21025	2.72e-284	789	KOG3097@1|root,KOG3097@2759|Eukaryota	2759|Eukaryota	S	toll-like receptor 7 signaling pathway	MFS_1,UNC-93	unc-93	GO:0003674,GO:0005575,GO:0005622,GO:0005623,GO:0005737,GO:0005886,GO:0005887,GO:0006937,GO:0008150,GO:0010959,GO:0015459,GO:0016020,GO:0016021,GO:0016247,GO:0031224,GO:0031226,GO:0032879,GO:0043226,GO:0043228,GO:0043229,GO:0043232,GO:0043266,GO:0043269,GO:0043292,GO:0044057,GO:0044422,GO:0044424,GO:0044425,GO:0044444,GO:0044449,GO:0044459,GO:0044464,GO:0050789,GO:0051049,GO:0051239,GO:0055120,GO:…	-	-										-	-
1	204	Under	TRINITY_DN83_c1_g1_i28	1923	TRINITY_DN83_c1_g1_i28.p1	445	complete	2.5	238.141	1.34808	0.386378	3.48902	0.000484791	0.0184294	37.8	66.2	10.7	23.4	Cytoplasm|Nucleus	Nuclear export signal							7070.TC002592-PA	4.87e-58	206	KOG1075@1|root,KOG1075@2759|Eukaryota,3AB3G@33154|Opisthokonta,3BQKC@33208|Metazoa,3D77Y@33213|Bilateria,42261@6656|Arthropoda,3SQT9@50557|Insecta	33208|Metazoa	S	Reverse transcriptase (RNA-dependent DNA polymerase)	RVT_1	-	-	-	-										-	-
1	205	Under	TRINITY_DN831_c0_g1_i2	3104	TRINITY_DN831_c0_g1_i2.p1	863	complete	6.7	1659.09	2.74784	0.414579	6.62803	3.40205e-11	1.17789e-08	72.4	321.4	13.1	91	Cell membrane|Lysosome/Vacuole	Signal peptide|Transmembrane domain							7070.TC001981-PA	2.55e-274	788	KOG1215@1|root,KOG1215@2759|Eukaryota,38B6M@33154|Opisthokonta,3B9HR@33208|Metazoa,3CR8C@33213|Bilateria,41VDA@6656|Arthropoda,3SFWB@50557|Insecta	33208|Metazoa	T	Calcium ion binding	EGF_CA,FXa_inhibition,Ldl_recept_a,Ldl_recept_b,cEGF	-	GO:0003674,GO:0005488,GO:0005575,GO:0005623,GO:0005886,GO:0006810,GO:0006897,GO:0006898,GO:0008150,GO:0016020,GO:0016192,GO:0032368,GO:0032370,GO:0032879,GO:0038024,GO:0044464,GO:0044877,GO:0048518,GO:0050789,GO:0051049,GO:0051050,GO:0051179,GO:0051234,GO:0065007,GO:0071813,GO:0071814,GO:0071944,GO:0098657,GO:1905952,GO:1905954	-	ko:K20053	K20053	VLDLR	very low-density lipoprotein receptor							-	-
1	206	Under	TRINITY_DN831_c0_g1_i4	3029	TRINITY_DN831_c0_g1_i4.p1	838	complete	2.9	1205.1	1.53345	0.411232	3.72891	0.000192312	0.0093552	106.9	204.7	8.8	71.3	Cell membrane|Lysosome/Vacuole	Signal peptide|Transmembrane domain							121225.PHUM378200-PA	1.79e-274	788	KOG1215@1|root,KOG1215@2759|Eukaryota,38B6M@33154|Opisthokonta,3B9HR@33208|Metazoa,3CR8C@33213|Bilateria,41VDA@6656|Arthropoda,3SFWB@50557|Insecta,3E9EB@33342|Paraneoptera	33208|Metazoa	T	Coagulation Factor Xa inhibitory site	EGF_CA,FXa_inhibition,Ldl_recept_a,Ldl_recept_b,cEGF	-	GO:0003674,GO:0005488,GO:0005575,GO:0005623,GO:0005886,GO:0006810,GO:0006897,GO:0006898,GO:0008150,GO:0016020,GO:0016192,GO:0032368,GO:0032370,GO:0032879,GO:0038024,GO:0044464,GO:0044877,GO:0048518,GO:0050789,GO:0051049,GO:0051050,GO:0051179,GO:0051234,GO:0065007,GO:0071813,GO:0071814,GO:0071944,GO:0098657,GO:1905952,GO:1905954	-	ko:K20053	K20053	VLDLR	very low-density lipoprotein receptor							-	-
1	207	Under	TRINITY_DN86008_c0_g1_i1	780	TRINITY_DN86008_c0_g1_i1.p1	122	5prime_partial	6.7	6.43132	2.73662	0.873843	3.13171	0.00173794	0.0474389	1.3	5.8	0.6	3.2	Cell membrane								136037.KDR17994	2.37e-37	129	COG5274@1|root,KOG0537@2759|Eukaryota	2759|Eukaryota	CI	heme binding	Cyt-b5	CYB5A	GO:0002682,GO:0003674,GO:0003824,GO:0004033,GO:0004129,GO:0004768,GO:0005215,GO:0005488,GO:0005515,GO:0005575,GO:0005622,GO:0005623,GO:0005737,GO:0005739,GO:0005740,GO:0005741,GO:0005783,GO:0005789,GO:0005829,GO:0005975,GO:0005996,GO:0006082,GO:0006091,GO:0006629,GO:0006631,GO:0006732,GO:0006766,GO:0006767,GO:0006810,GO:0006811,GO:0006812,GO:0008047,GO:0008150,GO:0008152,GO:0008324,GO:0009055,GO:…	-	-										-	-
1	208	Under	TRINITY_DN8614_c0_g1_i2	726	TRINITY_DN8614_c0_g1_i2.p1	117	complete	25.1	5.6066	4.6505	1.37563	3.38064	0.00072317	0.0248354	0.5	6.9	0.9	4.6	Cytoplasm								136037.KDR11429	6.5e-34	124	KOG4691@1|root,KOG4691@2759|Eukaryota,3A3EB@33154|Opisthokonta,3BS0W@33208|Metazoa,3D8DT@33213|Bilateria,41ZPU@6656|Arthropoda,3SMZ0@50557|Insecta	33208|Metazoa	S	ribosomal protein, S26	MRP-S26	mRpS26	GO:0000313,GO:0000314,GO:0003674,GO:0003735,GO:0005198,GO:0005575,GO:0005622,GO:0005623,GO:0005737,GO:0005739,GO:0005759,GO:0005761,GO:0005763,GO:0005840,GO:0006412,GO:0006518,GO:0006807,GO:0008150,GO:0008152,GO:0009058,GO:0009059,GO:0009987,GO:0010467,GO:0015935,GO:0019538,GO:0031974,GO:0032543,GO:0032991,GO:0034641,GO:0034645,GO:0043043,GO:0043170,GO:0043226,GO:0043227,GO:0043228,GO:0043229,GO:…	-	ko:K17405	K17405	MRPS26	small subunit ribosomal protein S26							-	-
1	209	Under	TRINITY_DN8681_c0_g4_i1	1646	TRINITY_DN8681_c0_g4_i1.p1	427	complete	287.5	22.252	8.1676	1.25947	6.48496	8.87563e-11	2.85351e-08	0	10.3	0	6	Lysosome/Vacuole	Signal peptide							136037.KDR16715	5.05e-196	555	COG2355@1|root,KOG4127@2759|Eukaryota,38D9H@33154|Opisthokonta,3BCAM@33208|Metazoa,3CRIG@33213|Bilateria,41VRV@6656|Arthropoda,3SHVG@50557|Insecta	33208|Metazoa	O	Belongs to the metallo-dependent hydrolases superfamily. Peptidase M19 family	Peptidase_M19	-	-	3.4.13.19	ko:K01273	K01273	DPEP	membrane dipeptidase							-	-
1	210	Under	TRINITY_DN8681_c0_g4_i2	1636	TRINITY_DN8681_c0_g4_i2.p1	427	complete	18	25.2893	4.17061	1.20335	3.46582	0.000528617	0.0197617	0.9	11	0.6	7.3	Lysosome/Vacuole	Signal peptide							136037.KDR16715	5.05e-196	555	COG2355@1|root,KOG4127@2759|Eukaryota,38D9H@33154|Opisthokonta,3BCAM@33208|Metazoa,3CRIG@33213|Bilateria,41VRV@6656|Arthropoda,3SHVG@50557|Insecta	33208|Metazoa	O	Belongs to the metallo-dependent hydrolases superfamily. Peptidase M19 family	Peptidase_M19	-	-	3.4.13.19	ko:K01273	K01273	DPEP	membrane dipeptidase							-	-
1	211	Under	TRINITY_DN875_c2_g1_i9	2691	TRINITY_DN875_c2_g1_i9.p2	138	complete	32.3	171.459	5.01368	1.5413	3.25289	0.00114238	0.0345556	2	50.5	2	45	Cytoplasm|Nucleus	Peroxisomal targeting signal							51511.ENSCSAVP00000004745	1.29e-22	98.6	KOG4740@1|root,KOG4740@2759|Eukaryota,3A4S6@33154|Opisthokonta,3BS37@33208|Metazoa,3D8DB@33213|Bilateria,48GIN@7711|Chordata	33208|Metazoa	S	proton channel activity	DDE_3,DUF4817,HTH_24	-	-	-	-										-	-
1	212	Under	TRINITY_DN882_c0_g1_i1	737	TRINITY_DN882_c0_g1_i1.p1	118	complete	2.9	28.457	1.51569	0.432002	3.50851	0.000450618	0.0174247	12.4	24.6	4	5.1	Cytoplasm|Nucleus	Nuclear export signal							126957.SMAR013483-PA	4.24e-77	231	KOG3473@1|root,KOG3473@2759|Eukaryota,3A1QH@33154|Opisthokonta,3BQAG@33208|Metazoa,3D75N@33213|Bilateria,41ZAQ@6656|Arthropoda	33208|Metazoa	K	Belongs to the SKP1 family	Skp1_POZ	TCEB1	GO:0000003,GO:0000151,GO:0000153,GO:0000280,GO:0000578,GO:0000819,GO:0001666,GO:0002009,GO:0002165,GO:0003002,GO:0003674,GO:0005488,GO:0005515,GO:0005575,GO:0005622,GO:0005623,GO:0005634,GO:0005654,GO:0005694,GO:0005700,GO:0005705,GO:0005737,GO:0005829,GO:0006139,GO:0006351,GO:0006354,GO:0006355,GO:0006357,GO:0006366,GO:0006368,GO:0006464,GO:0006725,GO:0006807,GO:0006928,GO:0006950,GO:0006996,GO:…	-	ko:K03872	K03872	TCEB1	transcription elongation factor B, polypeptide 1							ko04066,ko04120,ko05200,ko05211,map04066,map04120,map05200,map05211	M00383,M00388
1	213	Under	TRINITY_DN8947_c0_g1_i1	739	TRINITY_DN8947_c0_g1_i1.p1	192	5prime_partial	2.1	104.778	1.10049	0.28379	3.87782	0.000105399	0.00618205	56.9	86.9	12.8	30.4	Nucleus	Nuclear export signal							136037.KDR19330	3.86e-76	234	2CI6V@1|root,2RZP5@2759|Eukaryota,39ZVB@33154|Opisthokonta,3BPKH@33208|Metazoa,3CV6U@33213|Bilateria,420DB@6656|Arthropoda,3SNUA@50557|Insecta	33208|Metazoa	K	Protein dimerization activity. It is involved in the biological process described with negative regulation of transcription, DNA-templated	HLH	ID2	GO:0000003,GO:0000082,GO:0000083,GO:0000122,GO:0000278,GO:0000785,GO:0000902,GO:0000904,GO:0000981,GO:0000988,GO:0000989,GO:0001076,GO:0001191,GO:0001525,GO:0001568,GO:0001654,GO:0001655,GO:0001656,GO:0001667,GO:0001700,GO:0001745,GO:0001751,GO:0001752,GO:0001754,GO:0001775,GO:0001779,GO:0001822,GO:0001885,GO:0001886,GO:0001932,GO:0001944,GO:0001966,GO:0002009,GO:0002064,GO:0002065,GO:0002066,GO:…	-	ko:K04680,ko:K17693,ko:K17695,ko:K17696	K04680	ID1	DNA-binding protein inhibitor ID1	K17693	ID2	DNA-binding protein inhibitor ID2	K17695	K17696		ko04015,ko04350,ko04390,ko04550,ko05202,map04015,map04350,map04390,map04550,map05202	-
1	214	Under	TRINITY_DN904_c0_g1_i1	4730	TRINITY_DN904_c0_g1_i1.p1	854	complete	2.4	659.899	1.28125	0.24467	5.23664	1.63522e-07	2.62862e-05	41.6	70	6.2	4.1	Nucleus	Nuclear export signal							136037.KDR09361	0	1245	KOG3575@1|root,KOG3575@2759|Eukaryota,39MN7@33154|Opisthokonta,3CP8G@33208|Metazoa,3E5D0@33213|Bilateria,41XYA@6656|Arthropoda,3SGF2@50557|Insecta	33208|Metazoa	K	binding. It is involved in the biological process described with	Hormone_recep,zf-C4	E75	GO:0000003,GO:0000122,GO:0000981,GO:0002376,GO:0003006,GO:0003674,GO:0003676,GO:0003677,GO:0003700,GO:0004879,GO:0005488,GO:0005575,GO:0005622,GO:0005623,GO:0005634,GO:0006355,GO:0006357,GO:0006955,GO:0006959,GO:0007154,GO:0007165,GO:0007276,GO:0007281,GO:0007292,GO:0007553,GO:0007591,GO:0008150,GO:0009605,GO:0009607,GO:0009719,GO:0009725,GO:0009889,GO:0009890,GO:0009892,GO:0009987,GO:0010033,GO:…	-	ko:K08701	K08701	NR1D3	nuclear receptor subfamily 1 group D member 3							-	-
1	215	Under	TRINITY_DN9218_c0_g1_i4	2738	TRINITY_DN9218_c0_g1_i4.p1	653	complete	7	80.901	2.81251	0.345567	8.13883	3.99112e-16	3.90522e-13	3.9	18.5	0.6	1.4	Cell membrane|Endoplasmic reticulum	Transmembrane domain							136037.KDR12258	0	899	COG1131@1|root,KOG0061@2759|Eukaryota,39X0D@33154|Opisthokonta,3BNPY@33208|Metazoa,3D5N8@33213|Bilateria,41VPV@6656|Arthropoda,3SHPQ@50557|Insecta	33208|Metazoa	Q	ATP- binding	ABC2_membrane,ABC_tran	-	GO:0003674,GO:0003824,GO:0005215,GO:0005319,GO:0005575,GO:0005623,GO:0005886,GO:0006810,GO:0006869,GO:0008150,GO:0010876,GO:0015248,GO:0015318,GO:0015399,GO:0015405,GO:0015850,GO:0015918,GO:0016020,GO:0016021,GO:0016462,GO:0016787,GO:0016817,GO:0016818,GO:0016887,GO:0017111,GO:0017127,GO:0022804,GO:0022857,GO:0030301,GO:0031224,GO:0033036,GO:0034040,GO:0034041,GO:0042623,GO:0042626,GO:0043492,GO:…	-	-										-	-
1	216	Under	TRINITY_DN9272_c0_g1_i1	1447	TRINITY_DN9272_c0_g1_i1.p1	341	complete	14.6	7.55215	3.86791	1.0557	3.66383	0.000248475	0.0112282	0.4	4.3	0.3	4.5	Extracellular	Signal peptide							13037.EHJ76118	3.52e-19	94.4	2E93Y@1|root,2SFHR@2759|Eukaryota,3AAH2@33154|Opisthokonta,3BV1N@33208|Metazoa,3DBKW@33213|Bilateria,423JQ@6656|Arthropoda,3SRS0@50557|Insecta,444UY@7088|Lepidoptera	33208|Metazoa	S	C-type lectin (CTL) or carbohydrate-recognition domain (CRD)	Lectin_C	-	-	-	-										-	-
1	217	Under	TRINITY_DN9279_c0_g1_i4	738	TRINITY_DN9279_c0_g1_i4.p1	204	complete	5.1	313.394	2.34366	0.731856	3.20236	0.00136309	0.0396021	87.1	280.4	30.8	194.8	Cytoplasm|Nucleus								136037.KDR17193	8.29e-80	243	COG0494@1|root,KOG3041@2759|Eukaryota,39WPU@33154|Opisthokonta,3BBM6@33208|Metazoa,3CXZK@33213|Bilateria,421FP@6656|Arthropoda	33208|Metazoa	L	NUDIX domain	NUDIX	NUDT5	GO:0000287,GO:0003674,GO:0003676,GO:0003723,GO:0003824,GO:0005488,GO:0005515,GO:0005575,GO:0005622,GO:0005623,GO:0005634,GO:0005737,GO:0005829,GO:0005975,GO:0005996,GO:0006014,GO:0006139,GO:0006163,GO:0006325,GO:0006338,GO:0006725,GO:0006753,GO:0006793,GO:0006796,GO:0006807,GO:0006996,GO:0008150,GO:0008152,GO:0009056,GO:0009058,GO:0009117,GO:0009123,GO:0009126,GO:0009132,GO:0009134,GO:0009141,GO:…	2.7.7.96,3.6.1.13,3.6.1.58	ko:K01515,ko:K13987	K01515	nudF	ADP-ribose pyrophosphatase	K13987	NUDT5	ADP-sugar pyrophosphatase / 8-oxo-dGDP phosphatase / ADP-D-ribose pyrophosphorylase				ko00230,map00230	-
1	218	Under	TRINITY_DN929_c4_g1_i2	1103	TRINITY_DN929_c4_g1_i2.p1	277	complete	2.6	70.9921	1.37519	0.279548	4.91933	8.68405e-07	0.000117027	20.8	37.8	3.8	10.4	Cell membrane|Lysosome/Vacuole								136037.KDR23516	8.27e-129	373	COG0580@1|root,KOG0223@2759|Eukaryota,39WNG@33154|Opisthokonta,3BMPC@33208|Metazoa,3E4TW@33213|Bilateria,41UUS@6656|Arthropoda,3SIXT@50557|Insecta	33208|Metazoa	P	Belongs to the MIP aquaporin (TC 1.A.8) family	MIP	AQP5	-	-	ko:K09866,ko:K09867,ko:K09884	K09866	AQP4	aquaporin-4	K09867	AQP5	aquaporin-5	K09884			ko04962,ko04970,ko04976,map04962,map04970,map04976	-
1	219	Under	TRINITY_DN94_c0_g1_i25	2909	TRINITY_DN94_c0_g1_i25.p1	513	5prime_partial	3.6	247.024	1.84744	0.593557	3.1125	0.00185513	0.0495839	19.5	44.5	4.5	29.7	Nucleus								136037.KDR09398	1.71e-263	730	COG0160@1|root,KOG1403@2759|Eukaryota,38GHK@33154|Opisthokonta,3BBKV@33208|Metazoa,3CX69@33213|Bilateria,41UEP@6656|Arthropoda,3SGT7@50557|Insecta	33208|Metazoa	E	Belongs to the class-III pyridoxal-phosphate-dependent aminotransferase family	Aminotran_3	PHYKPL	GO:0002376,GO:0002520,GO:0003674,GO:0003824,GO:0005488,GO:0005515,GO:0005575,GO:0005622,GO:0005623,GO:0005737,GO:0005739,GO:0005759,GO:0006082,GO:0006520,GO:0006553,GO:0006554,GO:0006629,GO:0006644,GO:0006646,GO:0006650,GO:0006793,GO:0006796,GO:0006807,GO:0007275,GO:0008144,GO:0008150,GO:0008152,GO:0008453,GO:0008483,GO:0008610,GO:0008654,GO:0009056,GO:0009058,GO:0009063,GO:0009066,GO:0009068,GO:…	4.2.3.134,4.2.3.2	ko:K14286,ko:K18202	K14286	AGXT2L1, ETNPPL	ethanolamine-phosphate phospho-lyase	K18202	AGXT2L2	5-phosphonooxy-L-lysine phospho-lyase				ko00310,ko00564,ko01100,map00310,map00564,map01100	-
1	220	Under	TRINITY_DN943_c0_g1_i1	2926	TRINITY_DN943_c0_g1_i1.p1	462	complete	4.4	29.9707	2.12108	0.553148	3.83457	0.000125786	0.00680487	2	6.1	0.9	2.8	Cell membrane								136037.KDR16435	4.26e-221	624	COG1524@1|root,KOG2645@2759|Eukaryota,38EE7@33154|Opisthokonta,3BA91@33208|Metazoa,3CRDS@33213|Bilateria,41V20@6656|Arthropoda,3SJR1@50557|Insecta	33208|Metazoa	S	Type I phosphodiesterase / nucleotide pyrophosphatase	Phosphodiest	-	-	-	ko:K18398	K18398	ENPP5	ectonucleotide pyrophosphatase/phosphodiesterase family member 5							-	-
1	221	Under	TRINITY_DN9479_c0_g1_i1	1273	TRINITY_DN9479_c0_g1_i1.p1	210	complete	3.2	42.1212	1.65594	0.498172	3.32403	0.000887275	0.0285259	9	18.8	1.1	7.5	Cytoplasm	Mitochondrial transit peptide							7425.NV14988-PA	5.87e-54	177	KOG0850@1|root,KOG0848@2759|Eukaryota,3A2TH@33154|Opisthokonta,3BTEV@33208|Metazoa,3D9FU@33213|Bilateria,420JM@6656|Arthropoda,3SP0M@50557|Insecta,46MCK@7399|Hymenoptera	33208|Metazoa	K	OHCU decarboxylase	OHCU_decarbox	-	-	4.1.1.97	ko:K13485	K13485	PRHOXNB, URAD	2-oxo-4-hydroxy-4-carboxy-5-ureidoimidazoline decarboxylase							ko00230,ko01100,map00230,map01100	M00546
1	222	Under	TRINITY_DN9479_c0_g1_i10	566	TRINITY_DN9479_c0_g1_i10.p1	124	complete	6.1	27.573	2.61721	0.62568	4.18298	2.87708e-05	0.00219487	9.3	37.9	6	16.7	Cytoplasm|Nucleus	Nuclear export signal							13037.EHJ63921	7.82e-38	133	KOG0850@1|root,KOG0848@2759|Eukaryota,3A2TH@33154|Opisthokonta,3BTEV@33208|Metazoa,3D9FU@33213|Bilateria,420JM@6656|Arthropoda,3SP0M@50557|Insecta,447D3@7088|Lepidoptera	33208|Metazoa	K	OHCU decarboxylase	OHCU_decarbox	-	-	4.1.1.97	ko:K13485	K13485	PRHOXNB, URAD	2-oxo-4-hydroxy-4-carboxy-5-ureidoimidazoline decarboxylase							ko00230,ko01100,map00230,map01100	M00546
1	223	Under	TRINITY_DN9479_c0_g1_i8	661	TRINITY_DN9479_c0_g1_i8.p1	93	5prime_partial	3.8	14.3485	1.94438	0.544813	3.56889	0.000358491	0.0146916	5.7	15.3	2.4	4.6	Cytoplasm|Nucleus								7739.XP_002611914.1	1.39e-21	90.5	KOG0850@1|root,KOG0848@2759|Eukaryota,3A2TH@33154|Opisthokonta,3BR8T@33208|Metazoa,3E3ZQ@33213|Bilateria,48QP9@7711|Chordata	33208|Metazoa	K	Ureidoimidazoline (2-oxo-4-hydroxy-4-carboxy-5-) decarboxylase	OHCU_decarbox	urad	GO:0003674,GO:0003824,GO:0016829,GO:0016830,GO:0016831,GO:0051997	4.1.1.97	ko:K13485	K13485	PRHOXNB, URAD	2-oxo-4-hydroxy-4-carboxy-5-ureidoimidazoline decarboxylase							ko00230,ko01100,map00230,map01100	M00546
1	224	Under	TRINITY_DN9649_c0_g1_i1	2265	TRINITY_DN9649_c0_g1_i1.p1	614	complete	2.9	167.722	1.54397	0.455035	3.39308	0.000691119	0.0240807	20.2	43.4	4.9	26.5	Lysosome/Vacuole	Signal peptide							136037.KDR21204	1,58e-316	873	COG3525@1|root,KOG2499@2759|Eukaryota,39DD4@33154|Opisthokonta,3BBQT@33208|Metazoa,3D3CY@33213|Bilateria,41TTP@6656|Arthropoda,3SGRN@50557|Insecta	33208|Metazoa	G	beta-N-acetylhexosaminidase activity. It is involved in the biological process described with carbohydrate metabolic process	Glyco_hydro_20,Glycohydro_20b2,Homeobox	-	GO:0003674,GO:0003824,GO:0004553,GO:0004563,GO:0005575,GO:0005623,GO:0005886,GO:0008150,GO:0015929,GO:0016020,GO:0016231,GO:0016787,GO:0016798,GO:0040008,GO:0043900,GO:0043901,GO:0043903,GO:0044126,GO:0044130,GO:0044144,GO:0044146,GO:0044464,GO:0045926,GO:0048519,GO:0050789,GO:0065007,GO:0071944	3.2.1.52	ko:K12373	K12373	HEXA_B	hexosaminidase							ko00511,ko00513,ko00520,ko00531,ko00603,ko00604,ko01100,ko04142,map00511,map00513,map00520,map00531,map00603,map00604,map01100,map04142	M00079
1	225	Under	TRINITY_DN9793_c0_g1_i1	2625	TRINITY_DN9793_c0_g1_i1.p1	406	complete	2.1	554.097	1.09139	0.273758	3.9867	6.69989e-05	0.00436587	71.7	110.1	15.8	49.3	Cell membrane	Transmembrane domain							136037.KDR09300	6.95e-189	538	KOG3656@1|root,KOG3656@2759|Eukaryota,39UKM@33154|Opisthokonta,3BFSB@33208|Metazoa,3CYJB@33213|Bilateria,41UUF@6656|Arthropoda,3SI3K@50557|Insecta	33208|Metazoa	T	G-protein coupled receptor activity. It is involved in the biological process described with G-protein coupled receptor signaling pathway	7tm_1	GNRHR	GO:0001653,GO:0003674,GO:0004888,GO:0004930,GO:0004968,GO:0005488,GO:0005575,GO:0005623,GO:0005886,GO:0005887,GO:0006629,GO:0007154,GO:0007165,GO:0007186,GO:0007218,GO:0007275,GO:0007610,GO:0007623,GO:0007631,GO:0008150,GO:0008152,GO:0008188,GO:0008285,GO:0008528,GO:0009056,GO:0009719,GO:0009725,GO:0009987,GO:0010033,GO:0010243,GO:0016020,GO:0016021,GO:0016042,GO:0016499,GO:0016500,GO:0016520,GO:…	-	ko:K04280	K04280	GNRHR	gonadotropin-releasing hormone receptor							ko04080,ko04912,map04080,map04912	-
1	226	Under	TRINITY_DN9912_c0_g2_i1	2204	TRINITY_DN9912_c0_g2_i1.p1	378	complete	3.6	105.948	1.8655	0.509236	3.66333	0.00024896	0.0112282	11.2	30.1	1.8	20.5	Extracellular	Signal peptide							136037.KDR21213	4.86e-203	570	COG2273@1|root,2QRX5@2759|Eukaryota,38FWG@33154|Opisthokonta,3BF4Y@33208|Metazoa,3D1TU@33213|Bilateria,41X7R@6656|Arthropoda,3SJG7@50557|Insecta	33208|Metazoa	G	Gram-negative bacteria binding protein	CBM39,Glyco_hydro_16	GNBPB1	-	-	-										-	-
1	227	Under	TRINITY_DN999_c0_g1_i5	1540	TRINITY_DN999_c0_g1_i5.p1	384	complete	12.5	140.92	3.64031	0.774768	4.69858	2.6198e-06	0.000299282	7.5	58.5	3.6	45.1	Extracellular	Signal peptide							136037.KDR14962	4.18e-143	424	COG3325@1|root,KOG2806@2759|Eukaryota,38BJK@33154|Opisthokonta,3BA7Q@33208|Metazoa,3CS5K@33213|Bilateria,41V8B@6656|Arthropoda,3SI9U@50557|Insecta	33208|Metazoa	G	It is involved in the biological process described with carbohydrate metabolic process	CBM_14,Glyco_hydro_18,LysM,Self-incomp_S1	CHIA	GO:0001817,GO:0001819,GO:0002376,GO:0002532,GO:0002791,GO:0002793,GO:0003674,GO:0003796,GO:0003824,GO:0004553,GO:0004568,GO:0005488,GO:0005515,GO:0005575,GO:0005576,GO:0005615,GO:0005622,GO:0005623,GO:0005737,GO:0005975,GO:0005976,GO:0006022,GO:0006026,GO:0006030,GO:0006032,GO:0006037,GO:0006040,GO:0006807,GO:0006950,GO:0006952,GO:0006954,GO:0006955,GO:0007275,GO:0007586,GO:0007591,GO:0008061,GO:…	3.2.1.14	ko:K01183	K01183	E3.2.1.14	chitinase							ko00520,ko01100,map00520,map01100	-
2	228	Under	defensin_g10	216	defensin_g10.p1	71	complete	8.5	22.7415	3.08131	0.944801	3.26134	0.00110888	0.0338149	31.9	165.7	23.2	115.2	Extracellular	Signal peptide	Phormicin [Blattella germanica]	defensin-like domain family	91	PSN30605.1	95.8	71
2	229	Under	defensin_g9	216	defensin_g9.p1	71	complete	7	22.8635	2.80892	0.795153	3.53255	0.000411573	0.0163071	36.9	162.2	12.9	112	Extracellular	Signal peptide	Phormicin [Blattella germanica]	defensin-like domain family	91	PSN30605.1	98.6	71
2	230	Under	TRINITY_DN1164_c0_g1_i1	905	TRINITY_DN1164_c0_g1_i1.p1	227	complete	23.8	906.757	4.57337	0.577099	7.92477	2.28569e-15	1.90517e-12	48.9	745.3	18.3	353	Extracellular	Signal peptide	chemosensory protein [Blattella germanica]		227	AMA98146.1	100	227
2	231	Under	TRINITY_DN117_c1_g2_i20	2004	TRINITY_DN117_c1_g2_i20.p1	202	complete	553.6	42.6969	9.11272	1.58442	5.75145	8.84794e-09	1.99123e-06	0	18.8	0	26.7	Cytoplasm|Nucleus	Nuclear export signal	hypothetical protein C0J52_23602 [Blattella germanica]	RT_nLTR_like	406	PSN43099.1	93.3	165
2	232	Under	TRINITY_DN117_c1_g2_i21	2007	TRINITY_DN117_c1_g2_i21.p1	202	complete	107.6	8.23112	6.74912	1.63508	4.12769	3.66433e-05	0.00266879	0	3.6	0	4.9	Cytoplasm|Nucleus	Nuclear export signal	hypothetical protein C0J52_23602 [Blattella germanica]	RT_nLTR_like	406	PSN43099.1	93.3	165
2	233	Under	TRINITY_DN11892_c0_g1_i2	2131	TRINITY_DN11892_c0_g1_i2.p1	349	complete	3.3	666.644	1.7428	0.430729	4.04616	5.20647e-05	0.00356145	77	189.3	16.9	102.5	Extracellular	Signal peptide	sushi, von Willebrand factor type A, EGF and pentraxin domain-containing protein 1-like [Zootermopsis nevadensis]	Chitin-binding domain type 2 (region 27-78)	356	XP_021913984.1	39.3	351
2	234	Under	TRINITY_DN12339_c0_g1_i2	1903	TRINITY_DN12339_c0_g1_i2.p1	220	complete	4.7	44.4833	2.23433	0.702369	3.18114	0.00146697	0.0416319	4.4	16.2	2	16.3	Lysosome/Vacuole	Signal peptide|Transmembrane domain	hypothetical protein C0J52_04660, partial [Blattella germanica]		228	PSN53289.1	80.7	228
2	235	Under	TRINITY_DN13583_c0_g1_i3	776	TRINITY_DN13583_c0_g1_i3.p1	142	5prime_partial	73.1	15.8615	6.19106	1.35794	4.55916	5.13591e-06	0.000535109	0.3	17	0.7	13.9	Cell membrane|Lysosome/Vacuole	Signal peptide|Transmembrane domain	hypothetical protein C0J52_25082 [Blattella germanica]		105	PSN37624.1	100	105
2	236	Under	TRINITY_DN13878_c1_g2_i1	1711	TRINITY_DN13878_c1_g2_i1.p1	298	5prime_partial	6.6	23.1624	2.72488	0.784039	3.47544	0.000510018	0.0192583	2	9.9	1	9	Endoplasmic reticulum	Signal peptide|Transmembrane domain	hypothetical protein C0J52_08054 [Blattella germanica]		151	PSN45762.1	97.3	146
2	237	Under	TRINITY_DN14093_c0_g1_i1	744	TRINITY_DN14093_c0_g1_i1.p1	145	complete	2.6	16.4228	1.40556	0.450095	3.1228	0.00179139	0.0483977	7.6	14.3	1.7	5.2	Extracellular	Signal peptide	hypothetical protein C0J52_23910 [Blattella germanica]		145	PSN34981.1	100	145
2	238	Under	TRINITY_DN1643_c0_g1_i10	1679	TRINITY_DN1643_c0_g1_i10.p1	395	complete	4.7	419.036	2.23149	0.615286	3.62676	0.000287	0.0124544	47.7	155.9	23.3	105.4	Extracellular	Signal peptide	ankyrin repeat protein [Coptotermes formosanus]		318	AGM32371.1	38.5	174
2	239	Under	TRINITY_DN18750_c0_g2_i1	355	TRINITY_DN18750_c0_g2_i1.p1	64	complete	21	29.0532	4.39018	1.11977	3.92061	8.83236e-05	0.00544582	6.6	81.9	5.3	104.1	Cytoplasm|Nucleus		hypothetical protein C0J52_23544 [Blattella germanica]		64	PSN34939.1	100	64
2	240	Under	TRINITY_DN2175_c2_g1_i7	1571	TRINITY_DN2175_c2_g1_i7.p1	320	complete	3.4	28.6084	1.7694	0.490993	3.60372	0.0003137	0.013208	4.6	10.9	1.1	5.2	Cell membrane	Transmembrane domain	hypothetical protein C0J52_08511 [Blattella germanica]		756	PSN42357.1	96.9	64
2	241	Under	TRINITY_DN2780_c1_g2_i1	1901	TRINITY_DN2780_c1_g2_i1.p2	101	5prime_partial	4.1	50.7741	2.03137	0.549511	3.69668	0.000218437	0.0102415	5.6	16.5	2.8	7.9	Cytoplasm		hypothetical protein C0J52_24762 [Blattella germanica]		72	PSN49526.1	100	72
2	242	Under	TRINITY_DN2780_c1_g2_i3	2238	TRINITY_DN2780_c1_g2_i3.p3	72	complete	6.4	37.0361	2.68669	0.801342	3.35274	0.000800152	0.0265205	2.4	10.8	1.9	3.6	Cytoplasm		hypothetical protein C0J52_24762 [Blattella germanica]		72	PSN49526.1	100	72
2	243	Under	TRINITY_DN299_c0_g1_i3	1476	TRINITY_DN299_c0_g1_i3.p1	163	complete	2.7	77.3527	1.41299	0.390597	3.61751	0.00029745	0.0127507	15.8	29	4.5	6.4	Extracellular	Signal peptide	hypothetical protein C0J52_15106 [Blattella germanica]		163	PSN37205.1	98.8	163
2	244	Under	TRINITY_DN31587_c0_g2_i1	1182	TRINITY_DN31587_c0_g2_i1.p1	242	complete	2.1	193.673	1.06043	0.325951	3.25335	0.00114053	0.0345556	61.2	87.6	21.8	12.4	Extracellular	Signal peptide	hypothetical protein C0J52_00160 [Blattella germanica]		214	PSN58286.1	88.4	242
2	245	Under	TRINITY_DN33092_c0_g1_i1	1587	TRINITY_DN33092_c0_g1_i1.p1	332	5prime_partial	3.1	118.251	1.63798	0.27676	5.91842	3.25046e-09	8.31267e-07	19.9	43.3	3.2	8.8	Nucleus		hypothetical protein C0J52_06893 [Blattella germanica]		345	PSN46477.1	100	332
2	246	Under	TRINITY_DN3491_c2_g1_i1	909	TRINITY_DN3491_c2_g1_i1.p1	114	5prime_partial	208.4	43.3786	7.70288	1.06354	7.24268	4.39894e-13	2.30228e-10	0.3	41	0.3	16	Extracellular	Signal peptide	hypothetical protein C0J52_19475 [Blattella germanica]		107	PSN38707.1	100	107
2	247	Under	TRINITY_DN3532_c0_g1_i1	3518	TRINITY_DN3532_c0_g1_i1.p1	1016	complete	11.5	95.8904	3.52056	0.391091	9.00188	2.21875e-19	4.16109e-16	2.3	18.5	0.9	5.5	Cell membrane		hypothetical protein C0J52_11159 [Blattella germanica]		973	PSN47393.1	98.5	946
2	248	Under	TRINITY_DN367_c0_g3_i2	1159	TRINITY_DN367_c0_g3_i2.p1	154	complete	98.3	52.6171	6.61935	0.772486	8.56888	1.04492e-17	1.56773e-14	0.6	35.9	0.8	8.9	Extracellular	Signal peptide	hypothetical protein C0J52_27331 [Blattella germanica]		123	PSN29901.1	99.1	115
2	249	Under	TRINITY_DN3783_c1_g1_i15	1404	TRINITY_DN3783_c1_g1_i15.p1	394	complete	14.8	323.722	3.88819	0.888309	4.37707	1.20283e-05	0.0010533	16.4	192.5	4.9	210.4	Extracellular	Signal peptide	hypothetical protein C0J52_24420 [Blattella germanica]		394	PSN31018.1	97.7	394
2	250	Under	TRINITY_DN3884_c0_g1_i3	653	TRINITY_DN3884_c0_g1_i3.p1	113	3prime_partial	180.1	13.8629	7.49244	2.16465	3.46127	0.000537638	0.0198353	0	23.9	0	37.8	Cytoplasm		hypothetical protein C0J52_06231 [Blattella germanica]		70	PSN53784.1	86.2	58
2	251	Under	TRINITY_DN3914_c0_g1_i7	3953	TRINITY_DN3914_c0_g1_i7.p1	589	complete	5	130.001	2.31966	0.523552	4.43062	9.3964e-06	0.000870231	5.7	21.1	2.4	14.1	Extracellular	Signal peptide	hypothetical protein C0J52_00719 [Blattella germanica]		836	PSN51507.1	88.7	362
2	252	Under	TRINITY_DN39217_c0_g1_i1	671	TRINITY_DN39217_c0_g1_i1.p1	114	complete	4.2	281.832	2.05515	0.474245	4.33353	1.46739e-05	0.00122764	106.5	292	39.9	115.2	Extracellular	Signal peptide	hypothetical protein C0J52_09951 [Blattella germanica]		114	PSN53862.1	99.1	114
2	253	Under	TRINITY_DN3965_c0_g1_i1	656	TRINITY_DN3965_c0_g1_i1.p1	108	complete	7.1	14.5011	2.83098	0.560978	5.04651	4.4995e-07	6.4911e-05	3.5	17.5	1.9	3.5	Extracellular	Signal peptide	hypothetical protein C0J52_12814 [Blattella germanica]		156	PSN34056.1	100	103
2	254	Under	TRINITY_DN4045_c0_g1_i2	1484	TRINITY_DN4045_c0_g1_i2.p1	83	complete	4.3	346.838	2.11574	0.465954	4.54065	5.60802e-06	0.000571079	48.6	143.7	5.6	73.9	Extracellular	Signal peptide	hypothetical protein C0J52_09807 [Blattella germanica]		83	PSN47019.1	100	83
2	255	Under	TRINITY_DN421_c1_g2_i1	860	TRINITY_DN421_c1_g2_i1.p1	99	5prime_partial	2.2	61.0474	1.12666	0.291272	3.86806	0.000109705	0.00629824	26.9	40.5	2.6	5.5	Cytoplasm		mariner Mos1 transposase [Trichonephila clavipes]		143	GFX33057.1	86.2	29
2	256	Under	TRINITY_DN4338_c0_g1_i1	422	TRINITY_DN4338_c0_g1_i1.p1	92	5prime_partial	14.2	26.6603	3.82426	0.638634	5.98819	2.1219e-09	5.55273e-07	6.6	66.3	3.4	31.8	Cytoplasm|Nucleus		hypothetical protein C0J52_12418 [Blattella germanica]		742	PSN54872.1	98.2	55
2	257	Under	TRINITY_DN4656_c0_g1_i13	1192	TRINITY_DN4656_c0_g1_i13.p1	87	complete	4	45.7963	2.01634	0.522899	3.85609	0.000115216	0.00649857	8.8	26.4	1.9	18.5	Nucleus	Nuclear localization signal	hypothetical protein C0J52_21374 [Blattella germanica]		87	PSN45567.1	66.3	83
2	258	Under	TRINITY_DN4880_c0_g1_i1	396	TRINITY_DN4880_c0_g1_i1.p2	61	complete	7.9	115.239	2.98708	0.745581	4.00638	6.16552e-05	0.00411736	53.8	262.2	14.9	197.7	Extracellular	Signal peptide	termicin [Reticulitermes virginicus]	Antifungal peptide termicin	61	ADJ18991.1	67.2	61
2	259	Under	TRINITY_DN49162_c0_g1_i1	1415	TRINITY_DN49162_c0_g1_i1.p1	162	complete	3.8	45.0248	1.9246	0.389211	4.94487	7.61951e-07	0.000105201	7.4	20	2.3	7.5	Cytoplasm|Nucleus	Nuclear export signal	hypothetical protein C0J52_02052 [Blattella germanica]		162	PSN58057.1	100	162
2	260	Under	TRINITY_DN492_c8_g1_i1	879	TRINITY_DN492_c8_g1_i1.p1	229	complete	5.4	76.7869	2.43766	0.366036	6.65961	2.7455e-11	9.65431e-09	16.6	62.3	5.3	18.7	Extracellular	Signal peptide	Hemolymph lipopolysaccharide-binding protein [Blattella germanica]		229	PSN54446.1	100	229
2	261	Under	TRINITY_DN49473_c0_g1_i1	770	TRINITY_DN49473_c0_g1_i1.p1	227	complete	3.5	29.0109	1.79847	0.457429	3.93169	8.43496e-05	0.00522945	10.4	25	3.4	8	Extracellular	Signal peptide	Hemolymph lipopolysaccharide-binding protein [Blattella germanica]		201	PSN30713.1	99.5	188
2	262	Under	TRINITY_DN5366_c0_g1_i2	1305	TRINITY_DN5366_c0_g1_i2.p1	202	complete	16.2	34.6185	4.01801	1.22155	3.28926	0.0010045	0.0315193	1.8	20.8	2.4	15.5	Extracellular	Signal peptide	hypothetical protein C0J52_24419 [Blattella germanica]		198	PSN31021.1	100	198
2	263	Under	TRINITY_DN53738_c0_g1_i1	584	TRINITY_DN53738_c0_g1_i1.p1	121	complete	5.7	7.95897	2.51054	0.773157	3.24713	0.00116575	0.0350271	2.8	10.6	1.2	5.8	Extracellular	Signal peptide	hypothetical protein C0J52_08469 [Blattella germanica]		121	PSN49749.1	99.2	121
2	264	Under	TRINITY_DN573_c0_g1_i19	1153	TRINITY_DN573_c0_g1_i19.p1	220	5prime_partial	2.9	61.629	1.52325	0.389519	3.9106	9.20659e-05	0.00558475	15.8	31.3	4	8.5	Extracellular	Signal peptide	hypothetical protein C0J52_08681 [Blattella germanica]		210	PSN42628.1	100	210
2	265	Under	TRINITY_DN592_c0_g1_i4	1072	TRINITY_DN592_c0_g1_i4.p1	113	complete	2.6	23.6958	1.3721	0.405465	3.38402	0.000714339	0.024619	7.1	12.8	1.7	2.3	Cytoplasm|Nucleus|Mitochondrion		hypothetical protein C0J52_15840 [Blattella germanica]		190	PSN32457.1	78.1	64
2	266	Under	TRINITY_DN6056_c0_g1_i4	819	TRINITY_DN6056_c0_g1_i4.p1	238	3prime_partial	3.3	12.656	1.74215	0.55434	3.14275	0.00167369	0.0461032	4.3	9.8	1.2	2.7	Nucleus	Nuclear localization signal	hypothetical protein C0J52_05930 [Blattella germanica]		253	PSN48517.1	79.4	199
2	267	Under	TRINITY_DN61756_c0_g1_i1	592	TRINITY_DN61756_c0_g1_i1.p1	135	5prime_partial	8.9	20.2066	3.1556	0.729892	4.32339	1.53653e-05	0.00127131	4.6	27.3	1.9	16.4	Extracellular	Signal peptide	hypothetical protein C0J52_03256 [Blattella germanica]		110	PSN50852.1	100	109
2	268	Under	TRINITY_DN648_c37_g1_i1	443	TRINITY_DN648_c37_g1_i1.p1	112	3prime_partial	10.9	12.9346	3.45237	0.690985	4.9963	5.84407e-07	8.22005e-05	3.9	27.6	3	5.7	Extracellular	Signal peptide	hypothetical protein C0J52_08307 [Blattella germanica]		580	PSN52255.1	100	112
2	269	Under	TRINITY_DN650_c0_g1_i1	735	TRINITY_DN650_c0_g1_i1.p1	142	complete	3.5	27.0081	1.82668	0.545845	3.34652	0.000818322	0.0270431	10.1	24.1	3.8	9.1	Lysosome/Vacuole	Signal peptide|Transmembrane domain	hypothetical protein C0J52_23720 [Blattella germanica]		98	PSN31600.1	98.8	80
2	270	Under	TRINITY_DN6553_c0_g3_i2	760	TRINITY_DN6553_c0_g3_i2.p1	173	5prime_partial	16.9	16.2342	4.07716	0.67247	6.06296	1.3364e-09	3.66777e-07	1.5	18.6	0.6	10.4	Extracellular	Signal peptide	hypothetical protein C0J52_19474, partial [Blattella germanica]		169	PSN38706.1	99.4	169
2	271	Under	TRINITY_DN658_c0_g1_i3	1652	TRINITY_DN658_c0_g1_i3.p1	319	5prime_partial	1.05806e+07	62.9763	23.3349	3.38408	6.89549	5.36779e-12	2.15718e-09	0	36	0	56.2	Nucleus	Nuclear localization signal	hypothetical protein C0J52_06072 [Blattella germanica]		208	PSN51170.1	99	208
2	272	Under	TRINITY_DN74365_c0_g1_i1	691	TRINITY_DN74365_c0_g1_i1.p1	195	5prime_partial	6.8	11.7005	2.77297	0.593489	4.67232	2.97822e-06	0.000335124	2.8	13.3	1.5	3.9	Lysosome/Vacuole	Transmembrane domain	hypothetical protein C0J52_17759 [Blattella germanica]		191	PSN33054.1	100	191
2	273	Under	TRINITY_DN7687_c0_g1_i1	750	TRINITY_DN7687_c0_g1_i1.p1	221	5prime_partial	3.8	11.4252	1.9248	0.578751	3.32579	0.000881681	0.0284654	4	10.4	2.5	1.6	Extracellular	Signal peptide	hypothetical protein C0J52_09076 [Blattella germanica]	Platelet-derived and vascular endothelial growth factors	222	PSN51614.1	100	221
2	274	Under	TRINITY_DN8_c1_g1_i10	3202	TRINITY_DN8_c1_g1_i10.p1	174	complete	22.3	291.747	4.47955	0.527303	8.49522	1.97565e-17	2.61542e-14	4.1	68.9	2.4	49.7	Lysosome/Vacuole	Transmembrane domain	hypothetical protein C0J52_17760 [Blattella germanica]		95	PSN33059.1	100	62
2	275	Under	TRINITY_DN8224_c0_g1_i1	420	TRINITY_DN8224_c0_g1_i1.p1	113	5prime_partial	28.6	30.0102	4.83628	0.704244	6.86734	6.54122e-12	2.5381e-09	3.7	74.2	2.4	33.2	Extracellular	Signal peptide	hypothetical protein C0J52_19476 [Blattella germanica]		114	PSN38708.1	100	113
2	276	Under	TRINITY_DN828_c0_g1_i1	1007	TRINITY_DN828_c0_g1_i1.p1	223	5prime_partial	3.8	220.743	1.91915	0.305111	6.28999	3.17477e-10	9.78743e-08	53.8	141.3	11.3	30.8	Extracellular	Signal peptide	Hemolymph lipopolysaccharide-binding protein [Blattella germanica]		222	PSN36100.1	99.6	222
2	277	Under	TRINITY_DN8344_c1_g3_i2	1319	TRINITY_DN8344_c1_g3_i2.p1	150	complete	5.7	6707.84	2.50685	0.793309	3.15999	0.00157775	0.043999	849.8	3939.8	198.1	4628.3	Extracellular	Signal peptide	hypothetical protein C0J52_12797 [Blattella germanica]		150	PSN51912.1	99.3	150
2	278	Under	TRINITY_DN8389_c0_g1_i1	960	TRINITY_DN8389_c0_g1_i1.p1	242	5prime_partial	18.2	19.8582	4.18716	0.983038	4.25941	2.04972e-05	0.0016129	1.3	18.3	0.2	21.4	Extracellular	Signal peptide	PREDICTED: protein takeout-like [Papilio xuthus]	Haemolymph juvenile hormone binding protein	235	XP_013173283.1	25.1	223
2	279	Under	TRINITY_DN84302_c0_g1_i1	1037	TRINITY_DN84302_c0_g1_i1.p1	274	complete	4.9	7.87387	2.29173	0.698122	3.28271	0.00102814	0.0320033	1.5	5.3	0.8	2.8	Extracellular	Signal peptide	hypothetical protein C0J52_01049 [Blattella germanica]		346	PSN54698.1	78.9	346
2	280	Under	TRINITY_DN9273_c0_g2_i1	1507	TRINITY_DN9273_c0_g2_i1.p1	417	complete	11	34.9111	3.4658	0.429784	8.06405	7.38059e-16	6.64401e-13	2.1	17	0.6	6.5	Cell membrane|Lysosome/Vacuole	Signal peptide|Transmembrane domain	hypothetical protein C0J52_08307 [Blattella germanica]		580	PSN52255.1	100	417
2	281	Under	TRINITY_DN947_c0_g1_i8	2749	TRINITY_DN947_c0_g1_i8.p1	118	complete	19.6	33.7543	4.29256	1.22279	3.51046	0.000447334	0.0173573	0.6	10.6	0.4	16.9	Cytoplasm|Nucleus		hypothetical protein C0J52_05059 [Blattella germanica]		313	PSN36505.1	100	118
2	282	Under	TRINITY_DN9598_c0_g1_i1	21964	TRINITY_DN9598_c0_g1_i1.p1	6597	complete	14	1370.31	3.80719	1.00691	3.78107	0.000156156	0.00811616	4.2	47.6	1.3	57.6	>6000 ND	>6000 ND	hypothetical protein C0J52_27716, partial [Blattella germanica]		6473	PSN32516.1	92.8	4259
3	283	Under	TRINITY_DN1268_c1_g1_i13	960	TRINITY_DN1268_c1_g1_i13.p1	74	complete	4.8	22.0533	2.25006	0.676184	3.32759	0.000875993	0.0283658	4.7	14.8	1.7	9.6	Mitochondrion
3	284	Under	TRINITY_DN12862_c0_g1_i1	443	TRINITY_DN12862_c0_g1_i1.p1	103	complete	3.3	58.9579	1.70725	0.522925	3.2648	0.0010954	0.0335858	48.5	108.8	23	47.6	Extracellular	Signal peptide
3	285	Under	TRINITY_DN1380_c2_g2_i1	888	TRINITY_DN1380_c2_g2_i1.p1	138	complete	26.2	262.057	4.71133	1.11185	4.23737	2.26158e-05	0.00177341	13.5	225.2	16.2	106.3	Extracellular	Signal peptide
3	286	Under	TRINITY_DN13803_c0_g1_i10	1795	TRINITY_DN13803_c0_g1_i10.p1	498	complete	7.6	404.656	2.92299	0.642258	4.55112	5.33613e-06	0.000553409	28.6	168.9	5.2	160.4	Extracellular	Signal peptide
3	287	Under	TRINITY_DN13803_c0_g1_i4	1750	TRINITY_DN13803_c0_g1_i4.p1	483	complete	4.6	307.413	2.20588	0.653787	3.37401	0.000740815	0.0251464	34.3	122.5	5.8	114.3	Extracellular	Signal peptide
3	288	Under	TRINITY_DN1407_c0_g4_i1	956	TRINITY_DN1407_c0_g4_i1.p1	59	complete	87.1	19.2724	6.44448	1.96292	3.2831	0.00102671	0.0320033	0.3	20.4	0.6	32.9	Cytoplasm|Mitochondrion
3	289	Under	TRINITY_DN1413_c0_g2_i2	839	TRINITY_DN1413_c0_g2_i2.p1	59	complete	19.4	23.9843	4.27952	1.09316	3.91483	9.04693e-05	0.00553264	1.7	26.8	1	32.8	Mitochondrion
3	290	Under	TRINITY_DN15270_c1_g1_i17	1268	TRINITY_DN15270_c1_g1_i17.p1	131	complete	6.9	18.6439	2.78231	0.662664	4.19867	2.68485e-05	0.00206221	2	10.3	0.4	6.3	Nucleus
3	291	Under	TRINITY_DN1621_c0_g1_i2	1595	TRINITY_DN1621_c0_g1_i2.p1	440	complete	2.4	83.1667	1.27497	0.382072	3.33698	0.000846946	0.0276239	16.8	27.4	1.6	8.4	Endoplasmic reticulum	Signal peptide|Transmembrane domain
3	292	Under	TRINITY_DN17699_c0_g1_i4	3588	TRINITY_DN17699_c0_g1_i4.p2	63	complete	4.5	58.812	2.15504	0.373668	5.76726	8.05704e-09	1.85024e-06	3.1	9.7	1.3	2	Mitochondrion
3	293	Under	TRINITY_DN1774_c0_g1_i18	1266	TRINITY_DN1774_c0_g1_i18.p1	230	5prime_partial	32.7	13.6265	5.03314	1.37217	3.66801	0.00024445	0.0111367	0.4	7.3	0.5	5.7	Cell membrane	Signal peptide|Transmembrane domain
3	294	Under	TRINITY_DN1774_c0_g1_i7	1550	TRINITY_DN1774_c0_g1_i7.p1	230	5prime_partial	84.7	66.261	6.40363	1.68223	3.80664	0.000140868	0.00742445	0.5	29	0.7	21.4	Cell membrane	Signal peptide|Transmembrane domain
3	295	Under	TRINITY_DN1824_c1_g1_i2	979	TRINITY_DN1824_c1_g1_i2.p1	136	complete	4.7	19433.6	2.24245	0.583667	3.842	0.000122034	0.00669828	4070.4	14748.7	769.5	11964.8	Extracellular	Signal peptide
3	296	Under	TRINITY_DN18407_c0_g1_i7	1318	TRINITY_DN18407_c0_g1_i7.p1	167	complete	157.9	34.9246	7.30303	2.04728	3.56719	0.00036083	0.0146941	0.2	25.8	0.4	42.9	Extracellular	Signal peptide
3	297	Under	TRINITY_DN1936_c0_g1_i25	1515	TRINITY_DN1936_c0_g1_i25.p2	90	complete	2.3	45.6616	1.20062	0.331063	3.62656	0.000287218	0.0124544	10.2	16.6	2.8	5.9	Cytoplasm|Nucleus
3	298	Under	TRINITY_DN1949_c0_g1_i3	745	TRINITY_DN1949_c0_g1_i3.p1	165	complete	4.5	15929.2	2.16823	0.576318	3.76221	0.00016842	0.00849843	4873.6	16751.4	699.7	13742.2	Extracellular	Signal peptide
3	299	Under	TRINITY_DN1982_c1_g2_i3	282	TRINITY_DN1982_c1_g2_i3.p1	93	internal	6.3	44.4953	2.65402	0.677328	3.91837	8.91492e-05	0.0054817	47	201.8	20.7	167.7	Nucleus
3	300	Under	TRINITY_DN2_c1_g1_i17	3415	TRINITY_DN2_c1_g1_i17.p1	77	complete	14.1	49.2594	3.81339	1.12358	3.39396	0.000688887	0.0240736	1	11.4	0.9	13.3	Mitochondrion	Mitochondrial transit peptide
3	301	Under	TRINITY_DN2023_c0_g1_i6	2133	TRINITY_DN2023_c0_g1_i6.p1	70	complete	3.7	76.3562	1.88517	0.533764	3.53184	0.000412684	0.0163224	8.2	22.4	3.3	13.8	Cytoplasm
3	302	Under	TRINITY_DN2174_c1_g5_i1	1657	TRINITY_DN2174_c1_g5_i1.p3	68	complete	7.8	37.3397	2.95447	0.897566	3.29164	0.000996047	0.0313073	2.8	18.3	0.9	26	Cytoplasm
3	303	Under	TRINITY_DN22388_c0_g3_i1	824	TRINITY_DN22388_c0_g3_i1.p1	90	complete	4.3	12.0309	2.10418	0.583322	3.60724	0.000309468	0.0130913	3.4	10.3	2	3.3	Cytoplasm|Nucleus
3	304	Under	TRINITY_DN2329_c1_g1_i5	2437	TRINITY_DN2329_c1_g1_i5.p1	102	complete	3.5	48.1429	1.81901	0.330199	5.50883	3.61231e-08	6.88941e-06	4.7	11.2	0.7	1.5	Cytoplasm
3	305	Under	TRINITY_DN2463_c0_g1_i9	2073	TRINITY_DN2463_c0_g1_i9.p1	59	5prime_partial	11.1	14.807	3.47268	0.935979	3.71021	0.000207085	0.00990439	0.7	4.8	0.8	1.4	Nucleus	Nuclear localization signal
3	306	Under	TRINITY_DN2589_c2_g1_i1	644	TRINITY_DN2589_c2_g1_i1.p1	73	complete	8.3	9.58475	3.04867	0.97119	3.13911	0.00169463	0.046623	2.1	10.9	0.8	7.2	Extracellular
3	307	Under	TRINITY_DN28512_c0_g1_i1	1062	TRINITY_DN28512_c0_g1_i1.p2	69	complete	7.4	11.798	2.89316	0.67843	4.26449	2.00357e-05	0.00158212	1.6	8.5	0.8	6.1	Cytoplasm
3	308	Under	TRINITY_DN3022_c0_g2_i2	1961	TRINITY_DN3022_c0_g2_i2.p1	134	5prime_partial	251.5	103.583	7.97466	0.846029	9.42599	4.26083e-21	1.06544e-17	0.2	41.8	0.2	24	Mitochondrion
3	309	Under	TRINITY_DN3022_c0_g2_i4	1961	TRINITY_DN3022_c0_g2_i4.p1	134	5prime_partial	87.1	56.9505	6.44465	1.92939	3.34024	0.000837046	0.0273804	0.4	25.3	0.4	30.8	Mitochondrion
3	310	Under	TRINITY_DN3022_c0_g2_i6	2801	TRINITY_DN3022_c0_g2_i6.p1	134	5prime_partial	66.9	87.361	6.06366	0.671893	9.02475	1.80111e-19	3.68491e-16	0.5	24.5	0.3	17.7	Mitochondrion
3	311	Under	TRINITY_DN3022_c0_g2_i8	2801	TRINITY_DN3022_c0_g2_i8.p1	134	5prime_partial	38.9	59.6049	5.2826	1.64514	3.21103	0.0013226	0.0386057	0.6	17.8	0.2	21.4	Mitochondrion
3	312	Under	TRINITY_DN343_c0_g1_i1	756	TRINITY_DN343_c0_g1_i1.p1	63	5prime_partial	3.9	13.1828	1.97731	0.525186	3.76497	0.000166567	0.00847041	4.6	11.8	1.2	2.3	Cytoplasm
3	313	Under	TRINITY_DN3585_c0_g2_i1	1166	TRINITY_DN3585_c0_g2_i1.p1	134	complete	5.8	12150.6	2.54316	0.740903	3.43251	0.000598024	0.021465	1742	8141.8	273.1	8988.4	Extracellular	Signal peptide
3	314	Under	TRINITY_DN392_c1_g1_i26	1769	TRINITY_DN392_c1_g1_i26.p1	80	complete	125.7	9.75802	6.97409	1.88961	3.69075	0.000223595	0.0103753	0	3.8	0	2.5	Cytoplasm
3	315	Under	TRINITY_DN4263_c0_g1_i1	670	TRINITY_DN4263_c0_g1_i1.p1	92	5prime_partial	83.3	119.426	6.38078	0.866646	7.36261	1.80345e-13	1.01467e-10	2.8	143	2	96.3	Extracellular	Signal peptide
3	316	Under	TRINITY_DN43375_c0_g1_i1	417	TRINITY_DN43375_c0_g1_i1.p2	106	5prime_partial	14.3	6.64676	3.83707	1.03849	3.69487	0.000220003	0.0102721	1.7	16.2	1.3	10.1	Mitochondrion
3	317	Under	TRINITY_DN4486_c0_g3_i4	923	TRINITY_DN4486_c0_g3_i4.p1	184	5prime_partial	3.4	14.6818	1.7659	0.528941	3.33855	0.000842158	0.0275077	4.2	10.1	2.2	1.9	Extracellular
3	318	Under	TRINITY_DN4589_c0_g1_i3	1454	TRINITY_DN4589_c0_g1_i3.p3	62	complete	58.1	24.3945	5.86073	0.89981	6.5133	7.35189e-11	2.39789e-08	0.3	12.2	0.2	3.5	Cytoplasm|Nucleus|Mitochondrion
3	319	Under	TRINITY_DN5200_c0_g1_i1	1202	TRINITY_DN5200_c0_g1_i1.p1	322	complete	6.5	52.7642	2.69724	0.588584	4.5826	4.5924e-06	0.00048522	6.6	29.2	3.9	9.8	Cytoplasm
3	320	Under	TRINITY_DN5401_c0_g2_i1	616	TRINITY_DN5401_c0_g2_i1.p1	67	complete	47.1	6.06813	5.55761	1.5156	3.66694	0.000245472	0.0111378	0.2	9.3	0.5	10.1	Extracellular	Signal peptide
3	321	Under	TRINITY_DN54153_c0_g1_i1	607	TRINITY_DN54153_c0_g1_i1.p1	102	complete	22.2	7.58558	4.47232	1.22869	3.6399	0.000272748	0.0120121	0.7	10.1	0.9	6.4	Cytoplasm|Nucleus	Nuclear export signal
3	322	Under	TRINITY_DN5774_c0_g1_i1	2620	TRINITY_DN5774_c0_g1_i1.p1	135	5prime_partial	51.2	225.166	5.67807	0.431455	13.1603	1.48502e-39	1.50101e-35	1.7	63.6	0.9	19.5	Extracellular	Signal peptide
3	323	Under	TRINITY_DN625_c0_g2_i1	1307	TRINITY_DN625_c0_g2_i1.p1	96	complete	19.6	73.0222	4.29002	1.08768	3.94419	8.00689e-05	0.00500542	3	37.8	1.8	28.5	Cytoplasm
3	324	Under	TRINITY_DN6674_c0_g1_i1	1825	TRINITY_DN6674_c0_g1_i1.p2	79	complete	65.5	50.1194	6.03434	1.19536	5.04815	4.46117e-07	6.47733e-05	0.5	24	0.2	29.4	Cytoplasm|Nucleus
3	325	Under	TRINITY_DN688_c0_g1_i18	529	TRINITY_DN688_c0_g1_i18.p1	73	5prime_partial	20.8	137.039	4.37665	0.781736	5.59863	2.16058e-08	4.30299e-06	16.9	272.4	3	275.5	Extracellular	Signal peptide
3	326	Under	TRINITY_DN719_c0_g1_i2	783	TRINITY_DN719_c0_g1_i2.p1	94	3prime_partial	54.8	52.5476	5.77628	1.30209	4.43616	9.15786e-06	0.000852901	1.5	50	1	42.6	Cytoplasm
3	327	Under	TRINITY_DN7300_c0_g1_i2	873	TRINITY_DN7300_c0_g1_i2.p1	218	5prime_partial	29.8	131.202	4.89513	0.643277	7.60967	2.74795e-14	1.76693e-11	6	119.8	5.1	19.9	Extracellular	Signal peptide
3	328	Under	TRINITY_DN73287_c0_g1_i1	991	TRINITY_DN73287_c0_g1_i1.p2	102	complete	3.2	43.9316	1.66591	0.451047	3.69343	0.000221249	0.0102909	12.4	26.9	4.3	5.3	Extracellular	Signal peptide
3	329	Under	TRINITY_DN77391_c0_g1_i1	857	TRINITY_DN77391_c0_g1_i1.p1	85	complete	7.4	10.6615	2.89658	0.693406	4.17731	2.94972e-05	0.00223514	1.8	8.8	0.8	2.7	Cytoplasm
3	330	Under	TRINITY_DN8129_c0_g1_i12	412	TRINITY_DN8129_c0_g1_i12.p2	65	3prime_partial	6.6	8.74877	2.73056	0.704483	3.87599	0.000106194	0.00619144	4.5	20.6	3.7	4.9	Cytoplasm
3	331	Under	TRINITY_DN81986_c0_g1_i1	528	TRINITY_DN81986_c0_g1_i1.p1	138	5prime_partial	4.4	21.5838	2.13498	0.60595	3.52337	0.000426095	0.0167938	10.7	31.5	6.4	8.9	Extracellular	Signal peptide
3	332	Under	TRINITY_DN91_c0_g3_i1	1825	TRINITY_DN91_c0_g3_i1.p2	95	complete	4.8	166.388	2.2553	0.649699	3.4713	0.000517954	0.0194926	17.1	51.9	1.1	30	Cytoplasm
3	333	Under	TRINITY_DN91_c0_g3_i2	792	TRINITY_DN91_c0_g3_i2.p2	91	complete	10.6	54.0547	3.406	1.07313	3.17389	0.0015041	0.0424183	7.2	48.6	7.2	32.3	Nucleus
4	334	Under	TRINITY_DN1003_c0_g1_i8	1794	TRINITY_DN1003_c0_g1_i8.p2~~TRINITY_DN1003_c0_g1_i8.p3			15	6.92672	3.91112	0.963552	4.05907	4.92689e-05	0.00340136	0.3	2.7	0.4	0.5	Endoplasmic reticulum~~Mitochondrion	Signal peptide~~0
4	335	Under	TRINITY_DN1187_c0_g1_i15	2997	TRINITY_DN1187_c0_g1_i15.p2~~TRINITY_DN1187_c0_g1_i15.p3			601	46.6365	9.23123	1.14288	8.07714	6.63014e-16	6.21714e-13	0	10.9	0	2.3	Cytoplasm|Nucleus~~Cytoplasm|Nucleus
4	336	Under	TRINITY_DN1463_c0_g1_i10	1718	TRINITY_DN1463_c0_g1_i10.p1~~TRINITY_DN1463_c0_g1_i10.p2			36.6	11.6535	5.19538	1.53119	3.39303	0.000691231	0.0240807	0.2	4.4	0.2	4.9	Cytoplasm|Nucleus~~Mitochondrion
4	337	Under	TRINITY_DN1644_c4_g1_i1	1483	TRINITY_DN1644_c4_g1_i1.p1~~TRINITY_DN1644_c4_g1_i1.p3			6.6	29.7889	2.73219	0.807372	3.38405	0.000714237	0.024619	2.9	12.2	1.5	10.1	Cytoplasm|Nucleus|Mitochondrion~~Cytoplasm|Nucleus
4	338	Under	TRINITY_DN1982_c0_g1_i5	1494	TRINITY_DN1982_c0_g1_i5.p1~~TRINITY_DN1982_c0_g1_i5.p2			3.6	27.0253	1.8362	0.570544	3.21833	0.00128937	0.037783	4.3	10.4	2.3	3	Cytoplasm~~Cytoplasm
4	339	Under	TRINITY_DN268_c1_g1_i10	2852	TRINITY_DN268_c1_g1_i10.p2~~TRINITY_DN268_c1_g1_i10.p4			3.5	78.1766	1.81639	0.543742	3.34055	0.000836135	0.0273804	6.5	16.5	4.3	8.3	Cytoplasm~~Cytoplasm|Nucleus	Nuclear localization signal~~Nuclear localization signal
4	340	Under	TRINITY_DN367_c0_g1_i3	1353	TRINITY_DN367_c0_g1_i3.p1~~TRINITY_DN367_c0_g1_i3.p3			56.7	183.785	5.82452	0.445781	13.0659	5.16021e-39	2.90327e-35	2.6	101.5	0.7	16.1	Extracellular~~Cytoplasm	Signal peptide~~0
4	341	Under	TRINITY_DN568_c1_g1_i3	1235	TRINITY_DN568_c1_g1_i3.p3~~TRINITY_DN568_c1_g1_i3.p5			76.7	9.9687	6.26094	1.19846	5.22414	1.7497e-07	2.73452e-05	0.1	6.2	0.3	2.7	Cytoplasm~~Cytoplasm|Nucleus
4	342	Under	TRINITY_DN68_c3_g1_i1	1900	TRINITY_DN68_c3_g1_i1.p1~~TRINITY_DN68_c3_g1_i1.p2			2.1	27.2753	1.07123	0.338244	3.16702	0.00154007	0.0432406	5	7.4	0.9	2	Mitochondrion~~Mitochondrion	Mitochondrial transit peptide~~0
5	343	Under	TRINITY_DN10051_c0_g4_i1	1212				38.7	20.1547	5.2753	1.45568	3.62393	0.000290155	0.0125335	0.5	15.6	0.1	22.5
5	344	Under	TRINITY_DN10345_c0_g1_i2	402				17.3	18.7928	4.11475	1.09298	3.76472	0.000166736	0.00847041	4.4	57.2	4	66.3
5	345	Under	TRINITY_DN1035_c0_g1_i11	923				3.2	116.144	1.66371	0.418726	3.97328	7.08898e-05	0.00453232	36.4	78.3	10.8	32.6
5	346	Under	TRINITY_DN1035_c1_g1_i1	419				2.8	108.05	1.50613	0.375435	4.01169	6.02862e-05	0.00404997	106.9	204.3	21.9	65.6
5	347	Under	TRINITY_DN1035_c1_g2_i2	1481				3.2	153.71	1.67562	0.428458	3.91081	9.19871e-05	0.00558475	27.5	59.3	7.5	21.1
5	348	Under	TRINITY_DN1056_c0_g1_i15	801				8.8	54.7049	3.13707	0.819267	3.82912	0.000128604	0.00689102	9	62	3.1	79.9
5	349	Under	TRINITY_DN10766_c2_g1_i1	307				23.3	5.28594	4.54168	1.39612	3.25306	0.00114168	0.0345556	1.5	21.2	2.9	15.7
5	350	Under	TRINITY_DN10784_c0_g1_i1	789				12.6	11.1617	3.65596	0.808479	4.52203	6.12506e-06	0.000614167	1.3	12.4	0.9	10.3
5	351	Under	TRINITY_DN1079_c1_g1_i5	1205				292.2	165.976	8.19082	1.67702	4.88415	1.03878e-06	0.000136711	0.6	131.7	0.6	184.6
5	352	Under	TRINITY_DN1095_c1_g2_i1	848				5.3	26.7802	2.40674	0.480497	5.00885	5.47552e-07	7.7501e-05	6.3	23.4	0.9	12.4
5	353	Under	TRINITY_DN112_c1_g2_i1	2048				4.7	142.568	2.22701	0.695606	3.20153	0.00136698	0.0396442	13.1	43.2	7.2	37.5
5	354	Under	TRINITY_DN11479_c1_g1_i1	323				14.4	9.3578	3.84536	1.0827	3.55164	0.000382834	0.015468	3.6	41	1	49
5	355	Under	TRINITY_DN11639_c1_g4_i1	569				49.7	52.1048	5.63586	1.16384	4.84246	1.28242e-06	0.000163982	2.5	100	1.9	121.5
5	356	Under	TRINITY_DN1172_c0_g3_i2	813				141	18.0494	7.13918	1.74352	4.09469	4.2274e-05	0.00302024	0.2	19.7	0.4	21.1
5	357	Under	TRINITY_DN1172_c0_g6_i2	672				85.1	43.7988	6.41071	1.48499	4.31701	1.58158e-05	0.00129431	1	70.7	0.2	105.8
5	358	Under	TRINITY_DN1186_c0_g1_i2	703				18.3	44.4474	4.19121	0.471831	8.88285	6.51685e-19	1.12817e-15	4.2	54.7	1.1	21.3
5	359	Under	TRINITY_DN12390_c0_g3_i5	376				19.6	56.7443	4.29368	1.15169	3.72816	0.000192882	0.0093552	12.7	204.1	7.7	294
5	360	Under	TRINITY_DN12456_c0_g1_i4	935				5.4	9.07468	2.44234	0.673285	3.62749	0.000286188	0.0124544	1.9	7.3	0.9	4.4
5	361	Under	TRINITY_DN1259_c0_g1_i5	829				12.6	57.4204	3.65916	1.02573	3.56739	0.000360551	0.0146941	6.2	64.5	1.7	81.9
5	362	Under	TRINITY_DN1264_c0_g1_i9	1196				75.8	189.242	6.24402	0.631596	9.8861	4.78304e-23	1.34553e-19	2.4	136.9	0.9	108.9
5	363	Under	TRINITY_DN12980_c8_g1_i1	818				6.3	90.8078	2.65273	0.342419	7.74702	9.4077e-15	6.61626e-12	18.8	84.8	2.9	36.4
5	364	Under	TRINITY_DN134_c0_g1_i2	531				909.9	70.2896	9.82956	2.18814	4.4922	7.04916e-06	0.000689745	0	160.2	0	255.9
5	365	Under	TRINITY_DN13556_c0_g1_i12	823				29.4	29.65	4.8783	0.68119	7.16144	7.98328e-13	3.74299e-10	1.5	30	1.5	8
5	366	Under	TRINITY_DN13911_c0_g1_i4	1404				9	23.4704	3.16422	0.8512	3.71736	0.000201318	0.00972246	1.9	12.1	1.3	6.6
5	367	Under	TRINITY_DN13927_c0_g2_i4	748				18.9	36.6837	4.23903	0.591901	7.16171	7.96743e-13	3.74299e-10	3.1	40	2.1	8.8
5	368	Under	TRINITY_DN1419_c2_g2_i1	305				5.5	10.1023	2.4722	0.772426	3.20057	0.00137157	0.0397261	9.8	36.1	6.2	16.9
5	369	Under	TRINITY_DN142_c1_g1_i5	392				3.6	99.8488	1.84081	0.42042	4.37851	1.19496e-05	0.0010533	92.3	221.1	29.9	75
5	370	Under	TRINITY_DN1428_c0_g1_i4	1334				2.7	188.421	1.42255	0.307594	4.62476	3.75037e-06	0.000411717	43.1	81.9	9.9	24.5
5	371	Under	TRINITY_DN14321_c0_g1_i8	1384				3.6	32.6674	1.83608	0.506853	3.62251	0.000291755	0.0125753	5.7	14.3	2.2	6.1
5	372	Under	TRINITY_DN1460_c1_g1_i1	1475				2.8	22.2757	1.45992	0.417735	3.49485	0.000474324	0.0181234	4.4	8.4	1.1	1.2
5	373	Under	TRINITY_DN14765_c0_g1_i4	1017				104.3	32.6556	6.70414	0.910347	7.36438	1.77974e-13	1.01467e-10	0.4	26.8	0.5	9.2
5	374	Under	TRINITY_DN14842_c1_g1_i9	644				11.9	8.04601	3.57393	1.05267	3.3951	0.000686032	0.0240485	1.2	9.7	1.6	4.7
5	375	Under	TRINITY_DN16216_c0_g1_i3	1308				12.1	27.8946	3.59527	0.630589	5.70145	1.18794e-08	2.59171e-06	1.8	15.2	1.5	2.6
5	376	Under	TRINITY_DN17496_c0_g1_i1	762				12.1	18.0385	3.59107	0.878243	4.08892	4.33378e-05	0.00308645	2.3	19.7	1.5	18.4
5	377	Under	TRINITY_DN17530_c0_g2_i1	523				5	18.0318	2.33119	0.597244	3.90325	9.49108e-05	0.00572645	8	29.2	5.3	12.2
5	378	Under	TRINITY_DN17701_c0_g1_i2	671				2.5	31.9428	1.30944	0.392471	3.33639	0.000848734	0.0276422	17.7	30.2	2.8	7
5	379	Under	TRINITY_DN1875_c3_g1_i1	1707				5.2	52.9976	2.37993	0.567649	4.19261	2.75759e-05	0.00211087	5.4	19	3	5.5
5	380	Under	TRINITY_DN1895_c0_g2_i2	270				3.8	45.6913	1.92169	0.449993	4.27049	1.95047e-05	0.00155107	78	199.3	17.4	68.2
5	381	Under	TRINITY_DN1912_c0_g2_i1	1402				2.2	150.394	1.14577	0.281799	4.06593	4.78422e-05	0.00334375	37.6	57.8	10.7	12.1
5	382	Under	TRINITY_DN1913_c2_g1_i3	516				47.3	9.77351	5.56369	1.71433	3.24541	0.0011728	0.0351451	0.6	22.5	0.7	35.4
5	383	Under	TRINITY_DN1951_c0_g1_i1	360				4.6	14.2774	2.1891	0.54791	3.99537	6.45939e-05	0.0042493	12.6	41.8	2.8	26.3
[truncated: 77 more rows]
[truncated: 7 more columns]
